# Supplementary material for: Neocucurbins A–G, novel macrocyclic diterpenes and their derivatives from Neocucurbitaria unguis-hominis FS685
Source: Royal Society of Chemistry journal article supplement (doi:10.1039/d2ob00585a), 2022-01-01
Supplement: d2ob00585a1.pdf [file d2ob00585a1.pdf]

## Supporting Information

### **Neocucurbins A-G, novel macrocyclic diterpenes and their derivatives from *Neocucurbitaria unguis-hominis* FS685**

Jinhua Hu<sup>a,b</sup>, Wenge Zhang<sup>c</sup>, Haibo Tan<sup>c</sup>, Saini Li<sup>a</sup>, Xiaoxia Gao<sup>b</sup>, Zhaoming Liu<sup>a</sup>, Yanlin Wang<sup>d</sup>, Hongxin Liu<sup>a,\*</sup>, Weimin Zhang<sup>a,\*</sup>

<sup>a</sup>State Key Laboratory of Applied Microbiology Southern China, Guangdong Provincial Key Laboratory of Microbial Culture Collection and Application, Institute of Microbiology, Guangdong Academy of Sciences, Guangzhou 510070, China

<sup>b</sup>College of Pharmacy, Guangdong Pharmaceutical University, Guangzhou 510006, China

<sup>c</sup>Key Laboratory of South China Agricultural Plant Molecular Analysis and Genetic Improvement, Guangdong Provincial Key Laboratory of Applied Botany, South China Botanical Garden, Chinese Academy of Sciences, Guangzhou 510650, China

<sup>d</sup>Key Laboratory of Ocean and Marginal Sea Geology, South China Sea Institute of Oceanology, Innovation Academy of South China Sea Ecology and Environmental Engineering, Chinese Academy of Sciences, Guangzhou 510301, China.

Corresponding Authors: E-mail: [wmzhang@gdim.cn](mailto:wmzhang@gdim.cn) (Zhang W. M.); [liuhx@gdim.cn](mailto:liuhx@gdim.cn) (Liu H. X.);

## List of Supporting Information

- Table S1.** X-ray crystallographic data for compound **1**.
- Table S2.** X-ray crystallographic data for compound **2**.
- Figure S1.** Key NOE correlations of compound **2** and **3**.
- Figure S2.** Key COSY and HMBC correlations of compounds **4-7**.
- Figure S3.**  $^1\text{H}$  NMR spectrum (500 MHz,  $\text{CD}_3\text{OD}$ ) of **1**.
- Figure S4.**  $^{13}\text{C}$  NMR spectrum (125 MHz,  $\text{CD}_3\text{OD}$ ) of **1**.
- Figure S5.**  $^1\text{H}$ - $^1\text{H}$  COSY spectrum of **1**.
- Figure S6.** HSQC spectrum of **1**.
- Figure S7.** HMBC spectrum of **1**.
- Figure S8.** NOESY spectrum of **1**.
- Figure S9.** HRESIMS spectrum of **1**.
- Figure S10.** UV spectrum of **1**.
- Figure S11.** IR spectrum of **1**.
- Figure S12.** CD spectrum of **1**.
- Figure S13.**  $^1\text{H}$  NMR spectrum (500 MHz,  $\text{CD}_3\text{OD}$ ) of **2**.
- Figure S14.**  $^{13}\text{C}$  NMR spectrum (125 MHz,  $\text{CD}_3\text{OD}$ ) of **2**.
- Figure S15.**  $^1\text{H}$ - $^1\text{H}$  COSY spectrum of **2**.
- Figure S16.** HSQC spectrum of **2**.
- Figure S17.** HMBC spectrum of **2**.
- Figure S18.** NOESY spectrum of **2**.
- Figure S19.** HRESIMS spectrum of **2**.
- Figure S20.** UV spectrum of **2**.
- Figure S21.** IR spectrum of **2**.
- Figure S22.** CD spectrum of **2**.
- Figure S23.**  $^1\text{H}$  NMR spectrum (500 MHz,  $\text{CD}_3\text{OD}$ ) of **3**.
- Figure S24.**  $^{13}\text{C}$  NMR spectrum (125 MHz,  $\text{CD}_3\text{OD}$ ) of **3**.
- Figure S25.**  $^1\text{H}$ - $^1\text{H}$  COSY spectrum of **3**.
- Figure S26.** HSQC spectrum of **3**.

**Figure S27.** HMBC spectrum of **3**.

**Figure S28.** NOESY spectrum of **3**.

**Figure S29.** HRESIMS spectrum of **3**.

**Figure S30.** UV spectrum of **3**.

**Figure S31.** IR spectrum of **3**.

**Figure S32.** CD spectrum of **3**.

**Figure S33.**  $^1\text{H}$  NMR spectrum (500 MHz,  $\text{CD}_3\text{OD}$ ) of **4**.

**Figure S34.**  $^{13}\text{C}$  NMR spectrum (125 MHz,  $\text{CD}_3\text{OD}$ ) of **4**.

**Figure S35.**  $^1\text{H}$ - $^1\text{H}$  COSY spectrum of **4**.

**Figure S36.** HSQC spectrum of **4**.

**Figure S37.** HMBC spectrum of **4**.

**Figure S38.** NOESY spectrum of **4**.

**Figure S39.** HRESIMS spectrum of **4**.

**Figure S40.** UV spectrum of **4**.

**Figure S41.** IR spectrum of **4**.

**Figure S42.** CD spectrum of **4**.

**Figure S43.**  $^1\text{H}$  NMR spectrum (500 MHz,  $\text{CD}_3\text{OD}$ ) of **5**.

**Figure S44.**  $^{13}\text{C}$  NMR spectrum (125 MHz,  $\text{CD}_3\text{OD}$ ) of **5**.

**Figure S45.**  $^1\text{H}$ - $^1\text{H}$  COSY spectrum of **5**.

**Figure S46.** HSQC spectrum of **5**.

**Figure S47.** HMBC spectrum of **5**.

**Figure S48.** NOESY spectrum of **5**.

**Figure S49.** HRESIMS spectrum of **5**.

**Figure S50.** UV spectrum of **5**.

**Figure S51.** IR spectrum of **5**.

**Figure S52.** CD spectrum of **5**.

**Figure S53.**  $^1\text{H}$  NMR spectrum (500 MHz,  $\text{CD}_3\text{OD}$ ) of **6**.

**Figure S54.**  $^{13}\text{C}$  NMR spectrum (125 MHz,  $\text{CD}_3\text{OD}$ ) of **6**.

**Figure S55.**  $^1\text{H}$ - $^1\text{H}$  COSY spectrum of **6**.

**Figure S56.** HSQC spectrum of **6**.

**Figure S57.** HMBC spectrum of **6**.

**Figure S58.** NOESY spectrum of **6**.

**Figure S59.** HRESIMS spectrum of **6**.

**Figure S60.** UV spectrum of **6**.

**Figure S61.** IR spectrum of **6**.

**Figure S62.** CD spectrum of **6**.

**Figure S63.**  $^1\text{H}$  NMR spectrum (500 MHz,  $\text{CD}_3\text{OD}$ ) of **7**.

**Figure S64.**  $^{13}\text{C}$  NMR spectrum (125 MHz,  $\text{CD}_3\text{OD}$ ) of **7**.

**Figure S65.**  $^1\text{H}$ - $^1\text{H}$  COSY spectrum (500 MHz,  $\text{CD}_3\text{OD}$ ) of **7**.

**Figure S66.** HSQC spectrum of **7**.

**Figure S67.** HMBC spectrum of **7**.

**Figure S68.** NOESY spectrum of **7**.

**Figure S69.** HRESIMS spectrum of **7**.

**Figure S70.** UV spectrum of **7**.

**Figure S71.** IR spectrum of **7**.

**Figure S72.** CD spectrum of **7**.

**The details of the ECD calculations of compounds 1-7.**

**Table S1.** X-ray crystallographic data for compound **1**.

|                                             |                                                               |
|---------------------------------------------|---------------------------------------------------------------|
| Identification code                         | 53p-3-8_collect                                               |
| Empirical formula                           | C <sub>20</sub> H <sub>30</sub> O <sub>5</sub>                |
| Formula weight                              | 350.44                                                        |
| Temperature/K                               | 100.00(10)                                                    |
| Crystal system                              | orthorhombic                                                  |
| Space group                                 | P2 <sub>1</sub> 2 <sub>1</sub> 2 <sub>1</sub>                 |
| a/Å                                         | 8.17520(10)                                                   |
| b/Å                                         | 10.18530(10)                                                  |
| c/Å                                         | 22.0750(2)                                                    |
| α/°                                         | 90                                                            |
| β/°                                         | 90                                                            |
| γ/°                                         | 90                                                            |
| Volume/Å <sup>3</sup>                       | 1838.12(3)                                                    |
| Z                                           | 4                                                             |
| ρ <sub>calc</sub> /cm <sup>3</sup>          | 1.266                                                         |
| μ/mm <sup>-1</sup>                          | 0.726                                                         |
| F(000)                                      | 760.0                                                         |
| Crystal size/mm <sup>3</sup>                | 0.1 × 0.1 × 0.08                                              |
| Radiation                                   | Cu Kα (λ = 1.54184)                                           |
| 2θ range for data collection/°              | 8.01 to 148.774                                               |
| Index ranges                                | -10 ≤ h ≤ 9, -12 ≤ k ≤ 12, -27 ≤ l ≤ 27                       |
| Reflections collected                       | 17927                                                         |
| Independent reflections                     | 3702 [R <sub>int</sub> = 0.0221, R <sub>sigma</sub> = 0.0134] |
| Data/restraints/parameters                  | 3702/4/243                                                    |
| Goodness-of-fit on F <sup>2</sup>           | 1.066                                                         |
| Final R indexes [I ≥ 2σ (I)]                | R <sub>1</sub> = 0.0287, wR <sub>2</sub> = 0.0714             |
| Final R indexes [all data]                  | R <sub>1</sub> = 0.0289, wR <sub>2</sub> = 0.0716             |
| Largest diff. peak/hole / e Å <sup>-3</sup> | 0.28/-0.25                                                    |
| Flack parameter                             | 0.04(4)                                                       |

**Table S2.** X-ray crystallographic data for compound **2**.

|                                             |                                                               |
|---------------------------------------------|---------------------------------------------------------------|
| Identification code                         | hujinhua_53p-3-34_collect                                     |
| Empirical formula                           | C <sub>20</sub> H <sub>30</sub> O <sub>5</sub>                |
| Formula weight                              | 350.44                                                        |
| Temperature/K                               | 100.00(10)                                                    |
| Crystal system                              | monoclinic                                                    |
| Space group                                 | P2 <sub>1</sub>                                               |
| a/Å                                         | 13.9823(4)                                                    |
| b/Å                                         | 7.7311(2)                                                     |
| c/Å                                         | 17.3343(5)                                                    |
| α/°                                         | 90                                                            |
| β/°                                         | 92.675(3)                                                     |
| γ/°                                         | 90                                                            |
| Volume/Å <sup>3</sup>                       | 1871.77(9)                                                    |
| Z                                           | 4                                                             |
| ρ <sub>calc</sub> /cm <sup>3</sup>          | 1.244                                                         |
| μ/mm <sup>-1</sup>                          | 0.713                                                         |
| F(000)                                      | 760.0                                                         |
| Crystal size/mm <sup>3</sup>                | 0.3 × 0.02 × 0.02                                             |
| Radiation                                   | Cu Kα (λ = 1.54184)                                           |
| 2θ range for data collection/°              | 6.328 to 149.906                                              |
| Index ranges                                | -17 ≤ h ≤ 17, -9 ≤ k ≤ 9, -21 ≤ l ≤ 20                        |
| Reflections collected                       | 19209                                                         |
| Independent reflections                     | 7440 [R <sub>int</sub> = 0.0861, R <sub>sigma</sub> = 0.0832] |
| Data/restraints/parameters                  | 7440/1/463                                                    |
| Goodness-of-fit on F <sup>2</sup>           | 1.041                                                         |
| Final R indexes [I ≥ 2σ (I)]                | R <sub>1</sub> = 0.0811, wR <sub>2</sub> = 0.2020             |
| Final R indexes [all data]                  | R <sub>1</sub> = 0.0894, wR <sub>2</sub> = 0.2126             |
| Largest diff. peak/hole / e Å <sup>-3</sup> | 0.52/-0.44                                                    |
| Flack parameter                             | -0.1(2)                                                       |

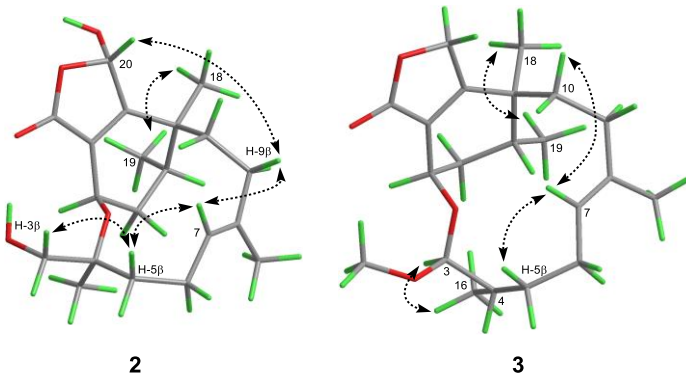

Figure S1. Key NOE correlations of compound **2** and **3**.

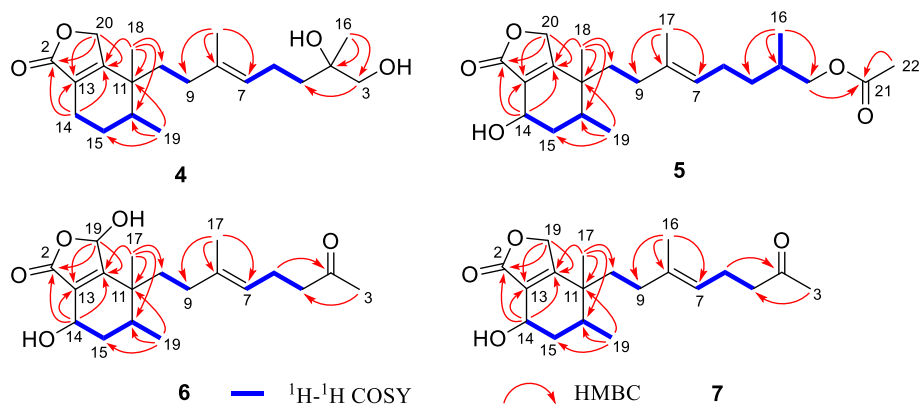

Figure S2. Key COSY and HMBC correlations of compounds **4-7**.

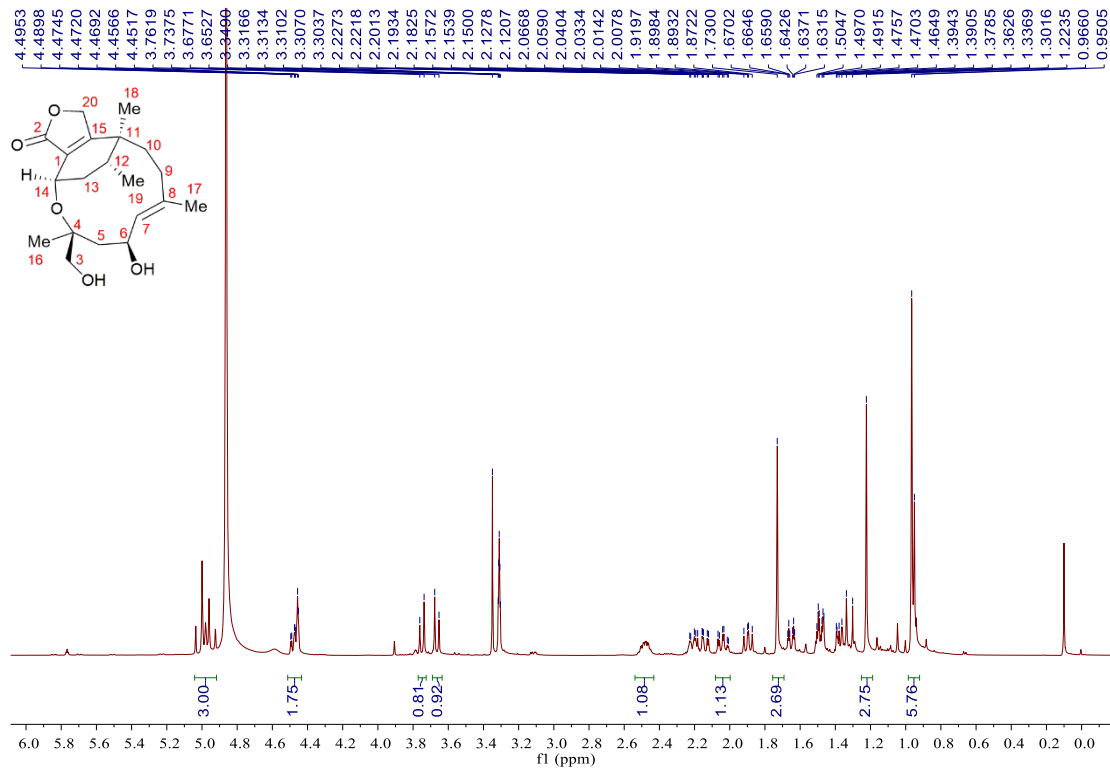

Figure S3.  $^1\text{H}$  NMR spectrum (500 MHz,  $\text{CD}_3\text{OD}$ ) of **1**.

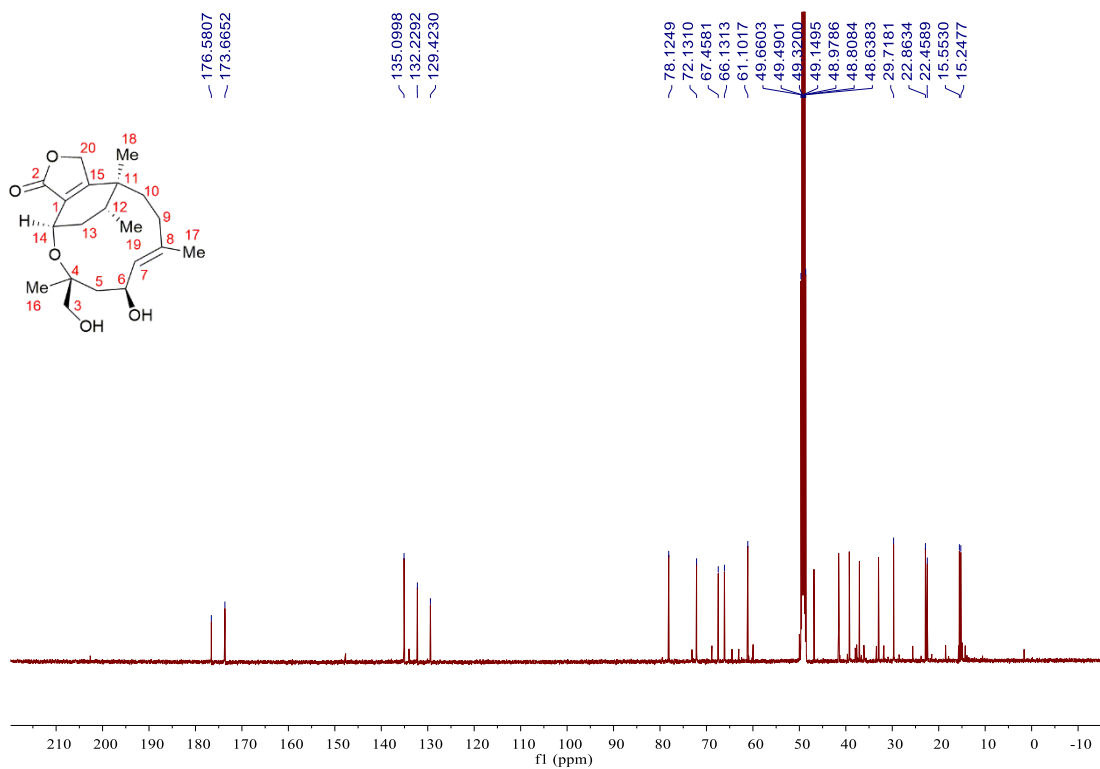

**Figure S4.**  $^{13}\text{C}$  NMR spectrum (125 MHz,  $\text{CD}_3\text{OD}$ ) of **1**.

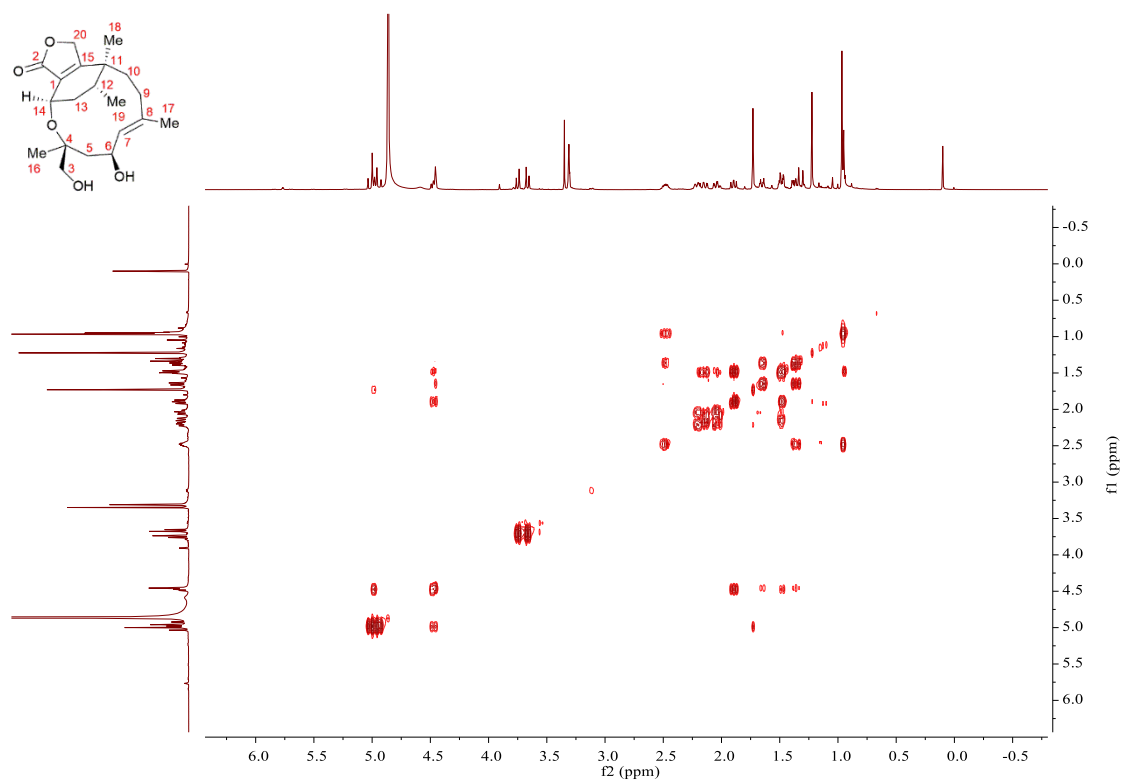

**Figure S5.**  $^1\text{H}$ - $^1\text{H}$  COSY spectrum (500 MHz,  $\text{CD}_3\text{OD}$ ) of **1**.



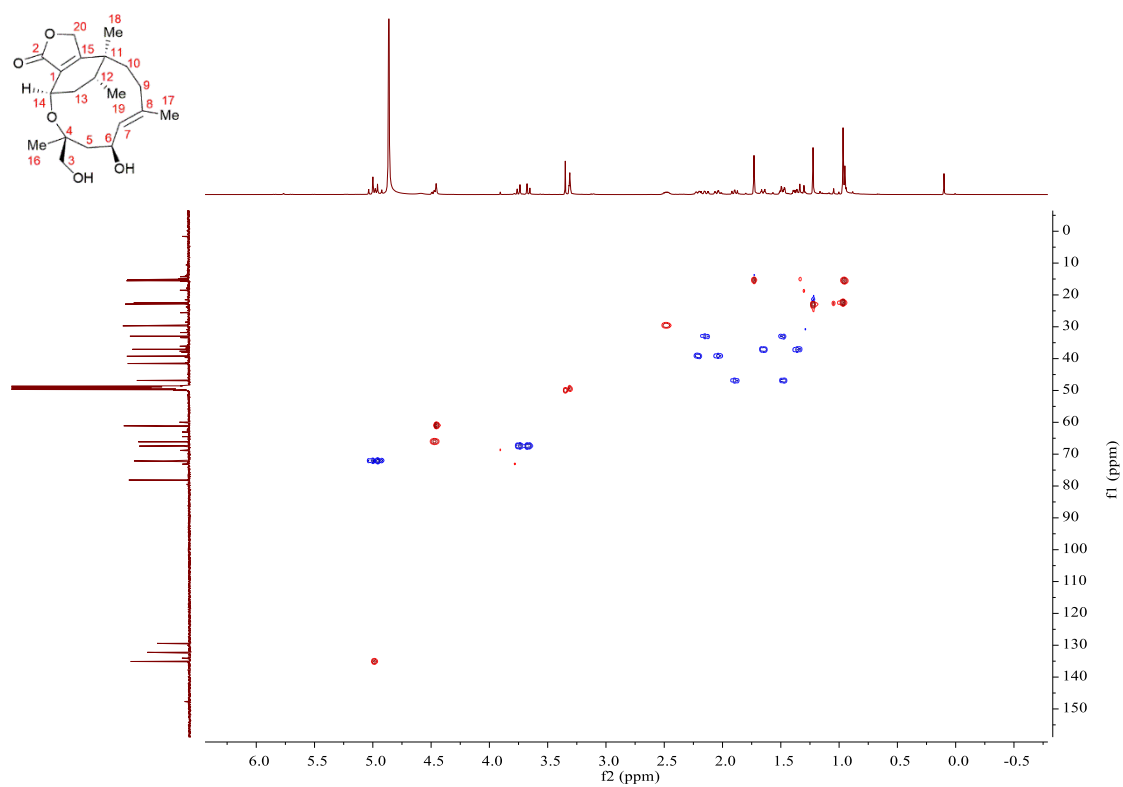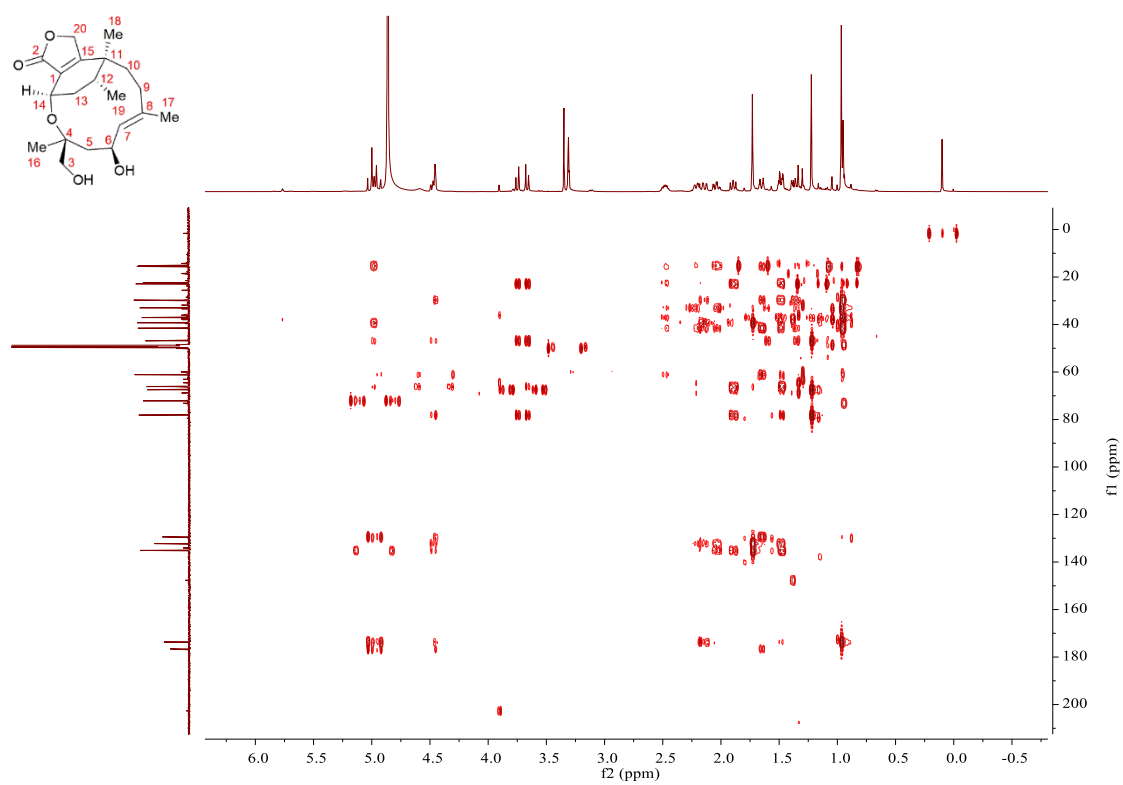

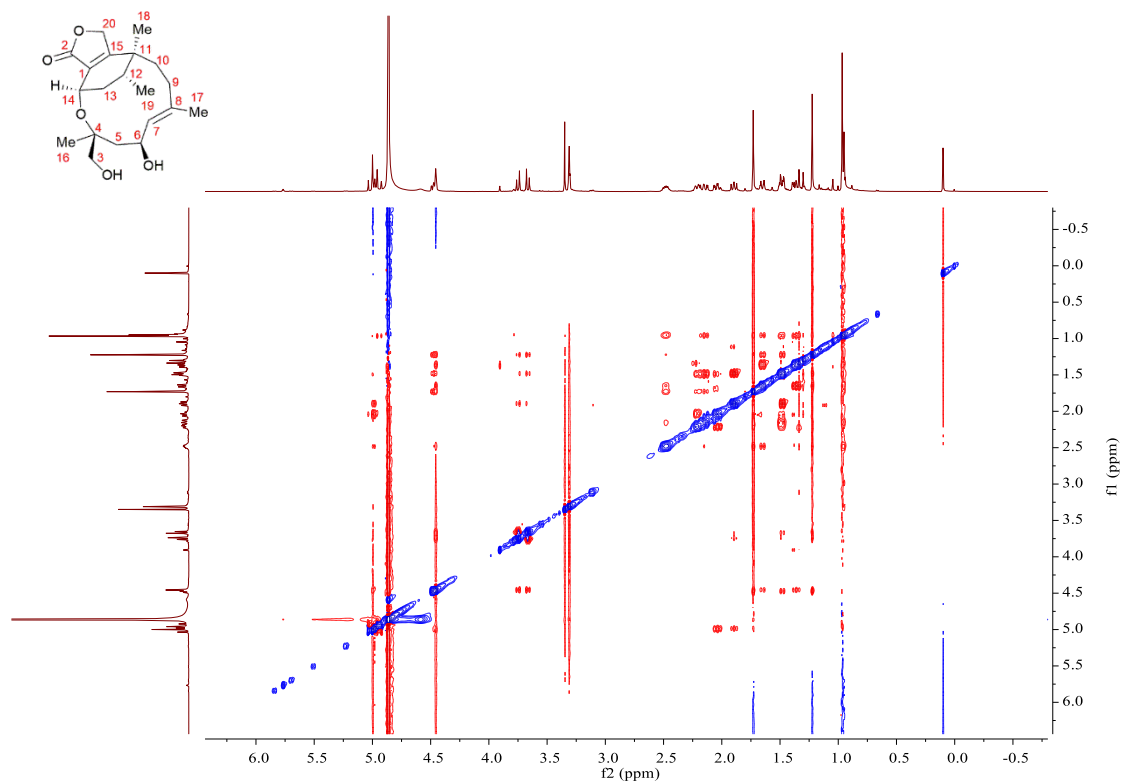

Figure S8. NOESY spectrum of **1**.

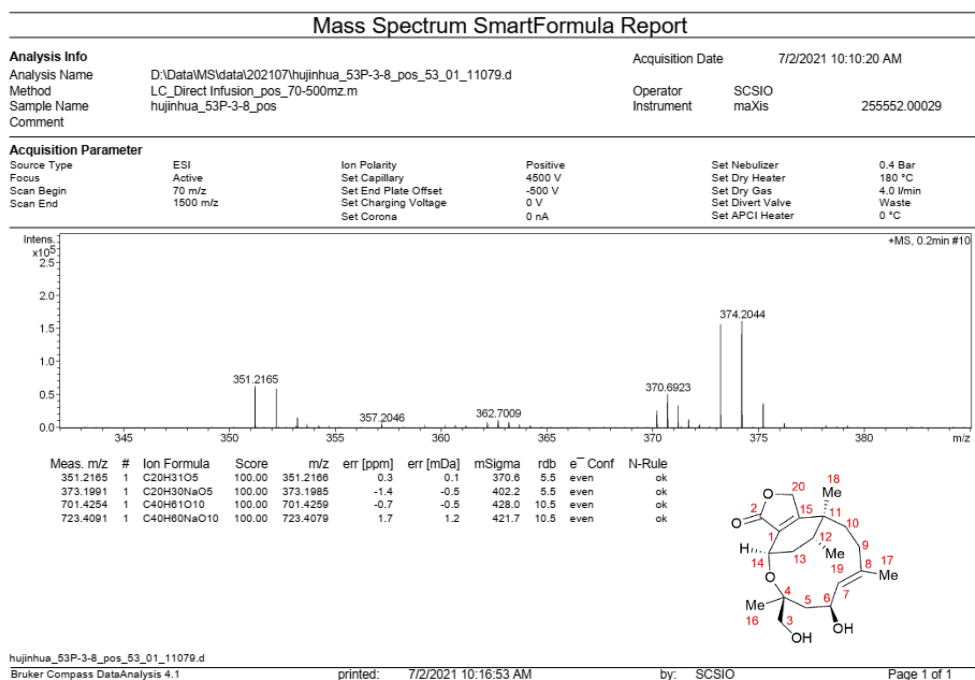

hujinhua\_53P-3-8\_pos\_53\_01\_11079.d  
Bruker Compass DataAnalysis 4.1

printed: 7/2/2021 10:16:53 AM

by: SCSIO

Page 1 of 1

Figure S9. HRESIMS spectrum of **1**.

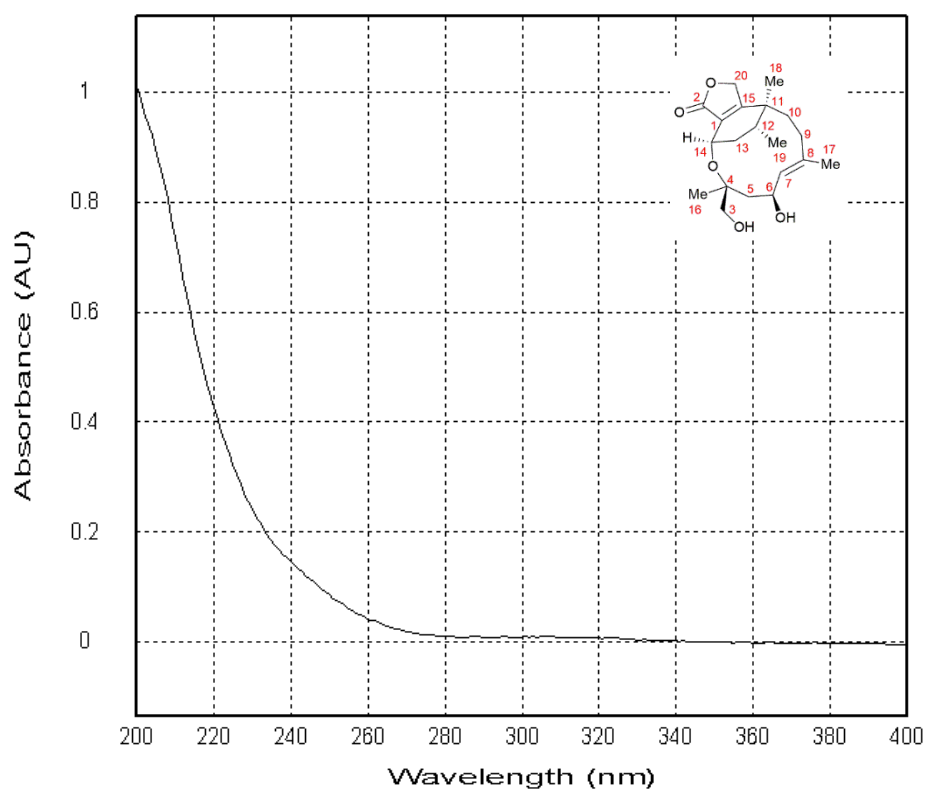

Figure S10. UV spectrum of 1.

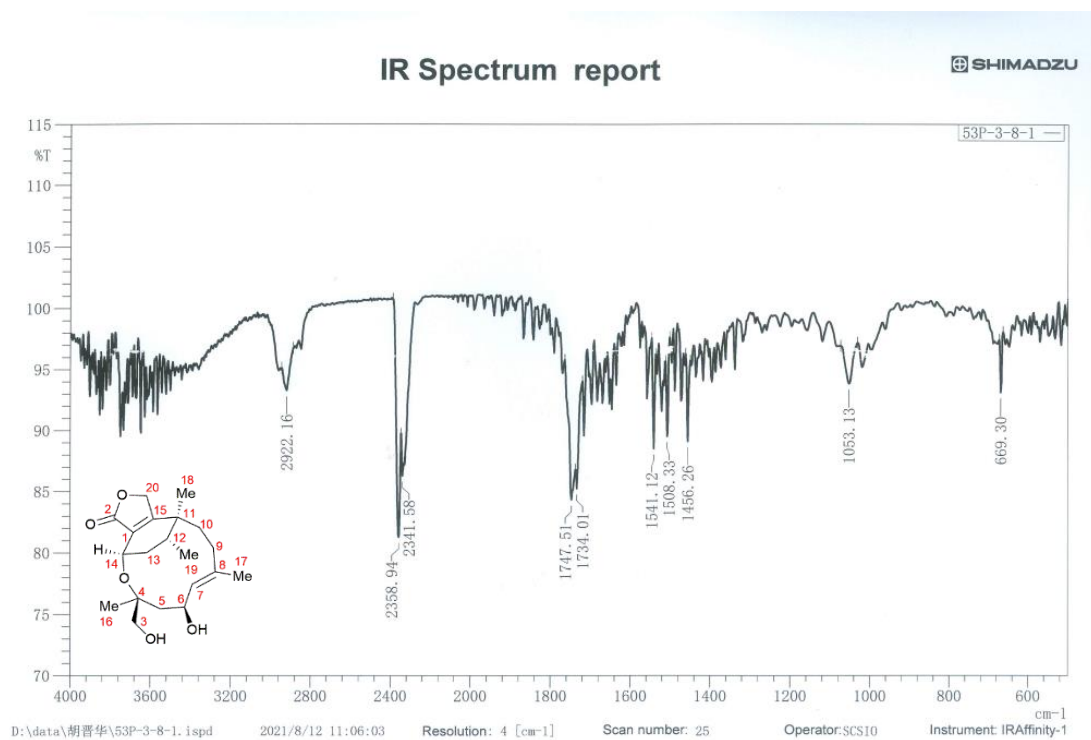

Figure S11. IR spectrum of 1.

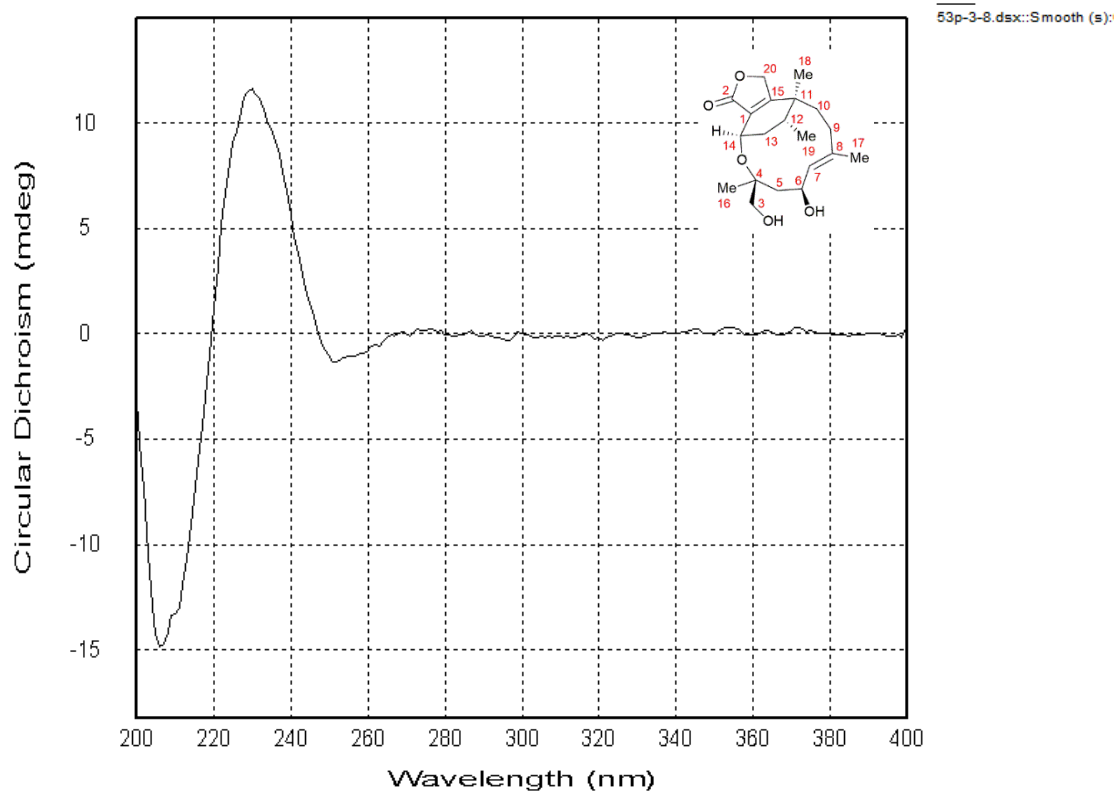

Figure S12. CD spectrum of 1.

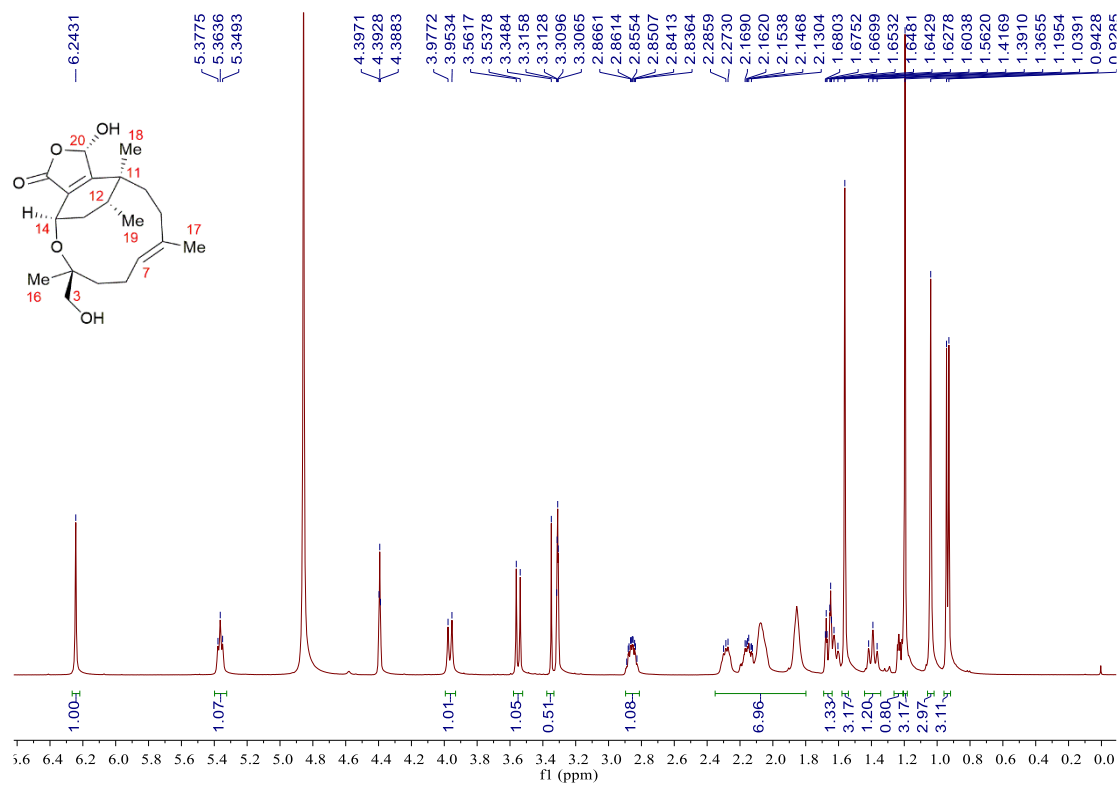

Figure S13.  $^1\text{H}$  NMR spectrum (500 MHz,  $\text{CD}_3\text{OD}$ ) of 2.

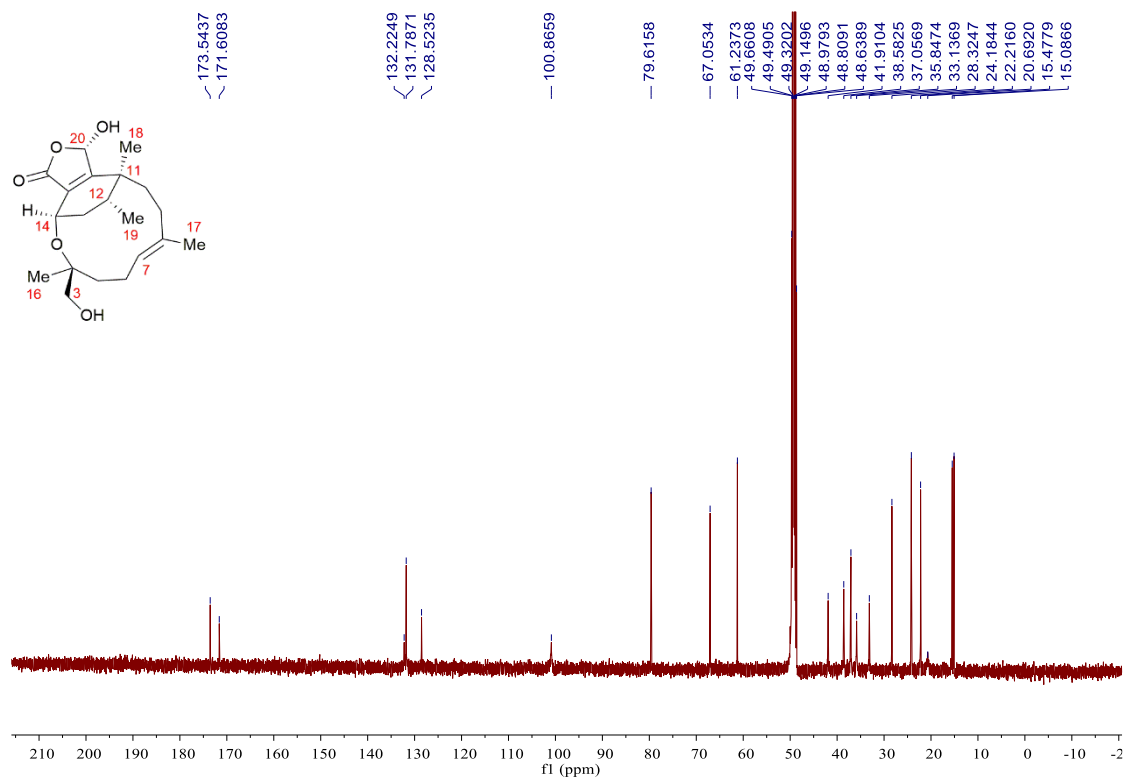

Figure S14.  $^{13}\text{C}$  NMR spectrum (125 MHz,  $\text{CD}_3\text{OD}$ ) of **2**.

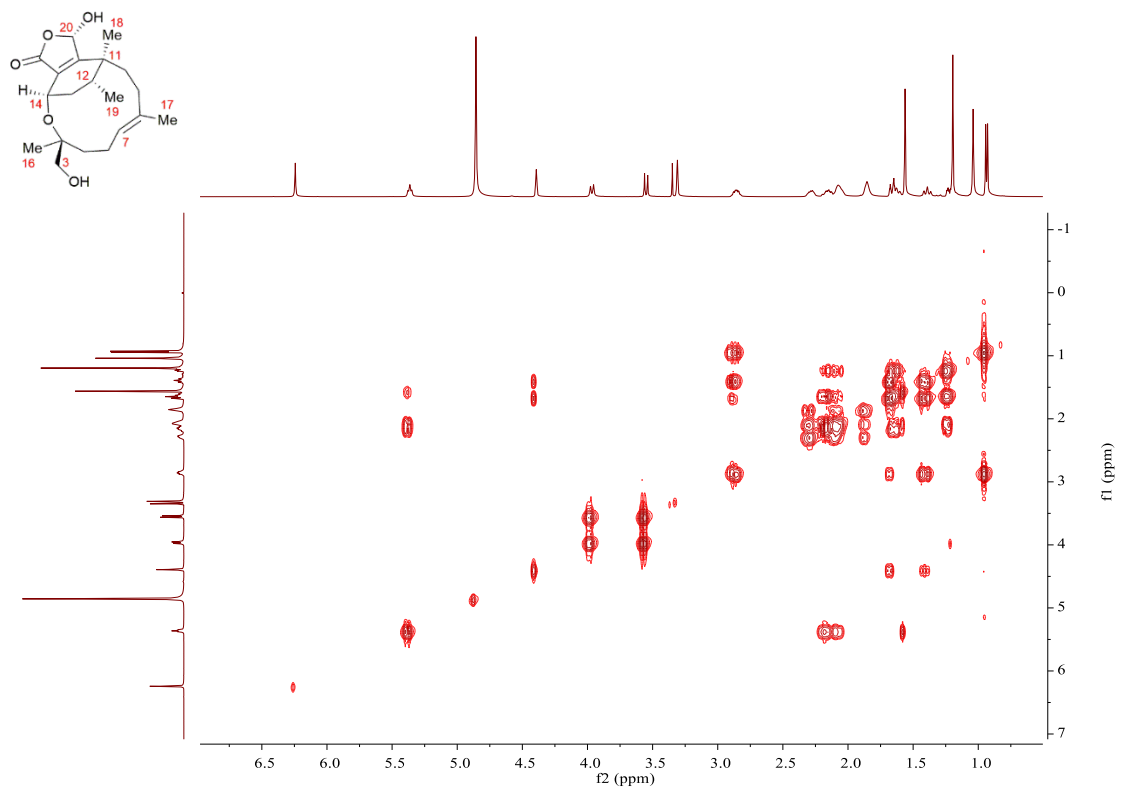

Figure S15.  $^1\text{H}$ - $^1\text{H}$  COSY spectrum of **2**.

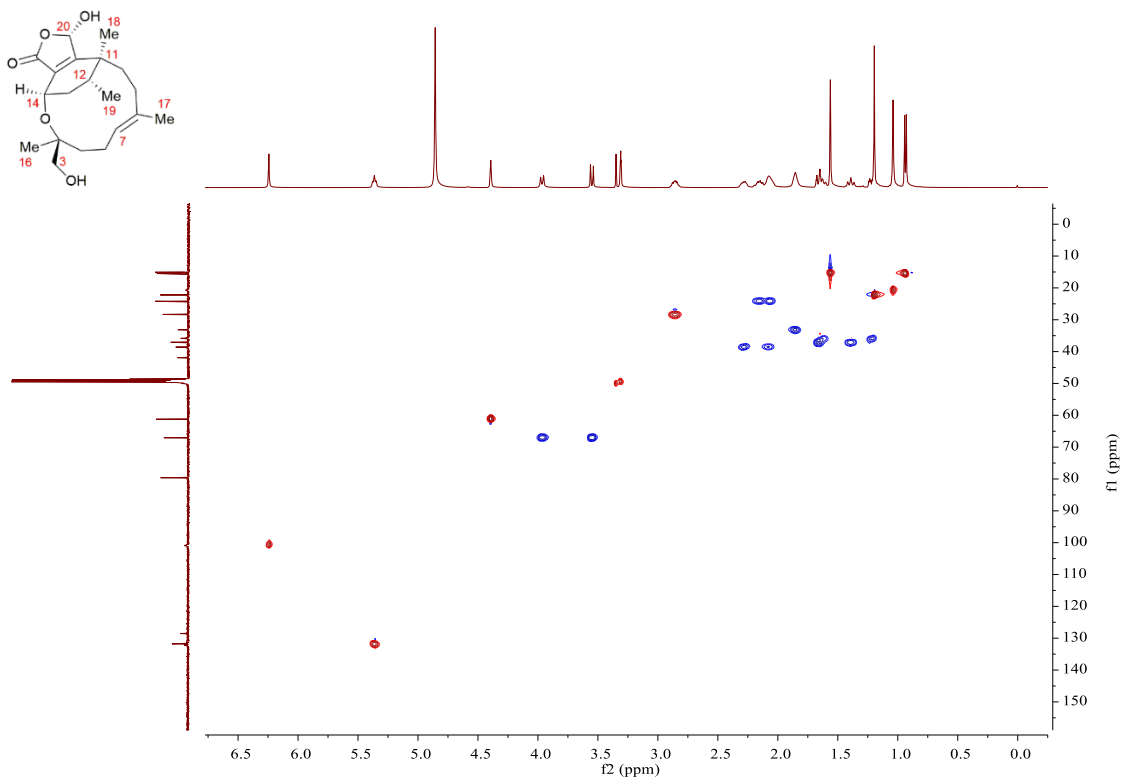

Figure S16. HSQC spectrum of **2**.

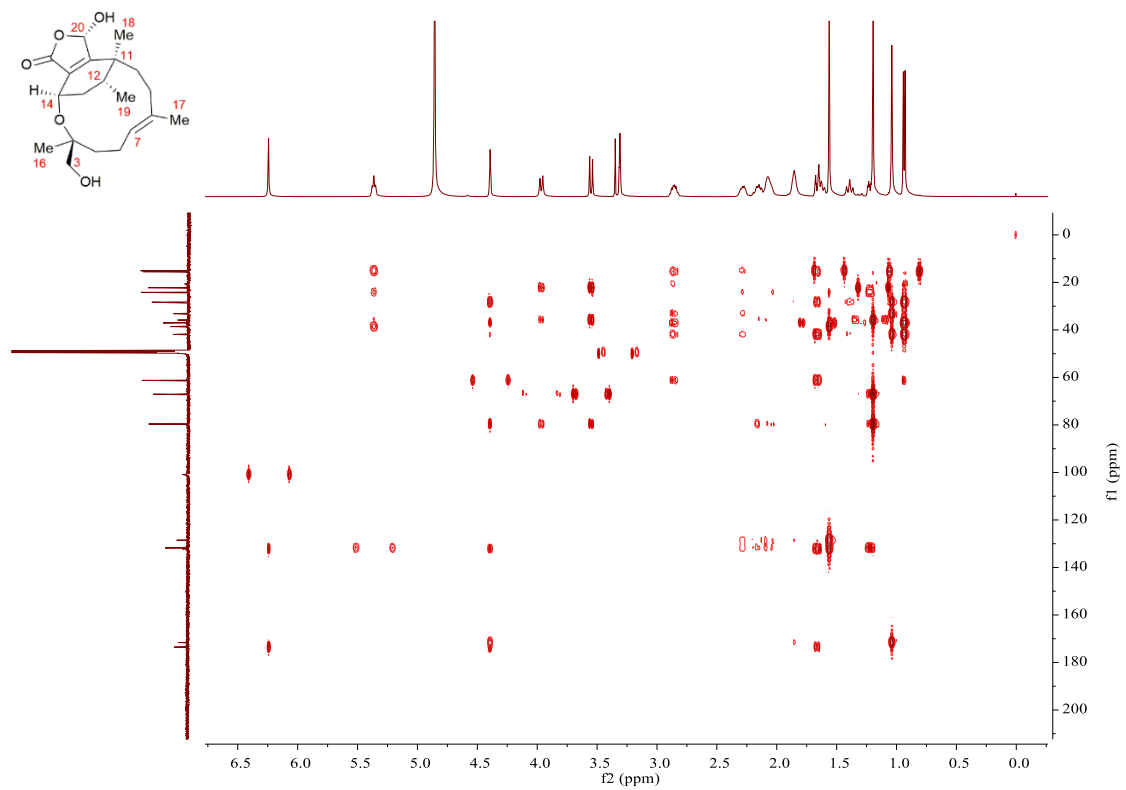

Figure S17. HMBC spectrum of **2**.

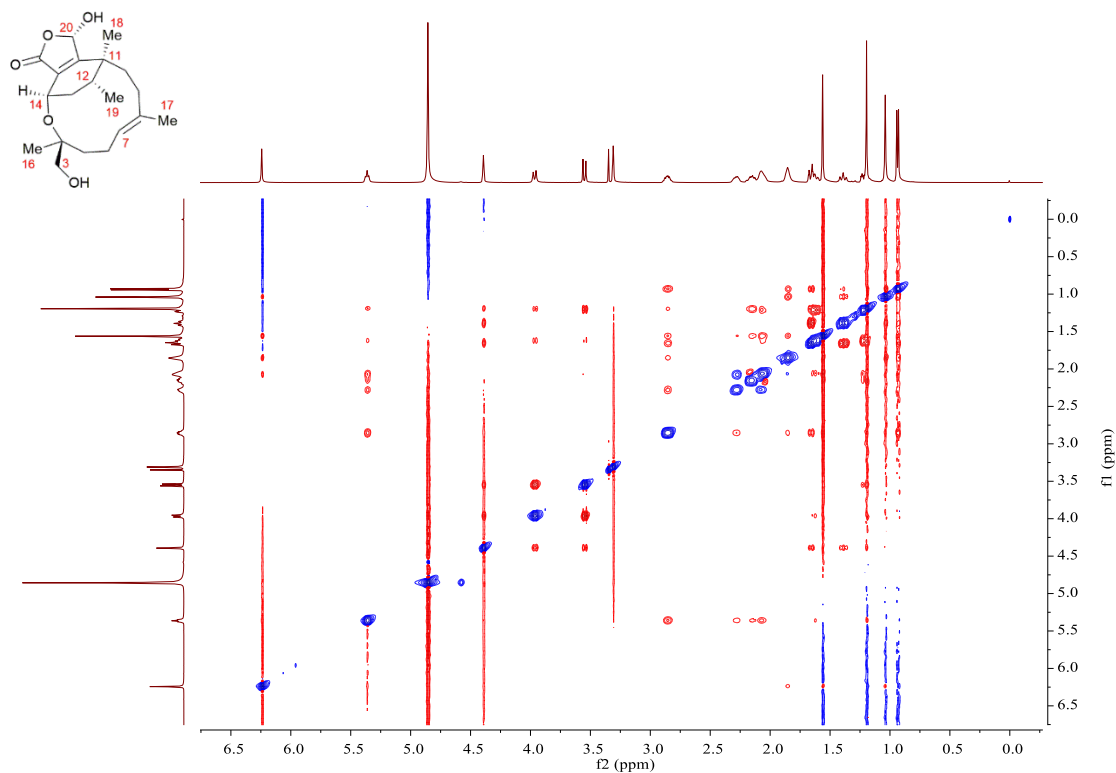

Figure S18. NOESY spectrum of **2**.

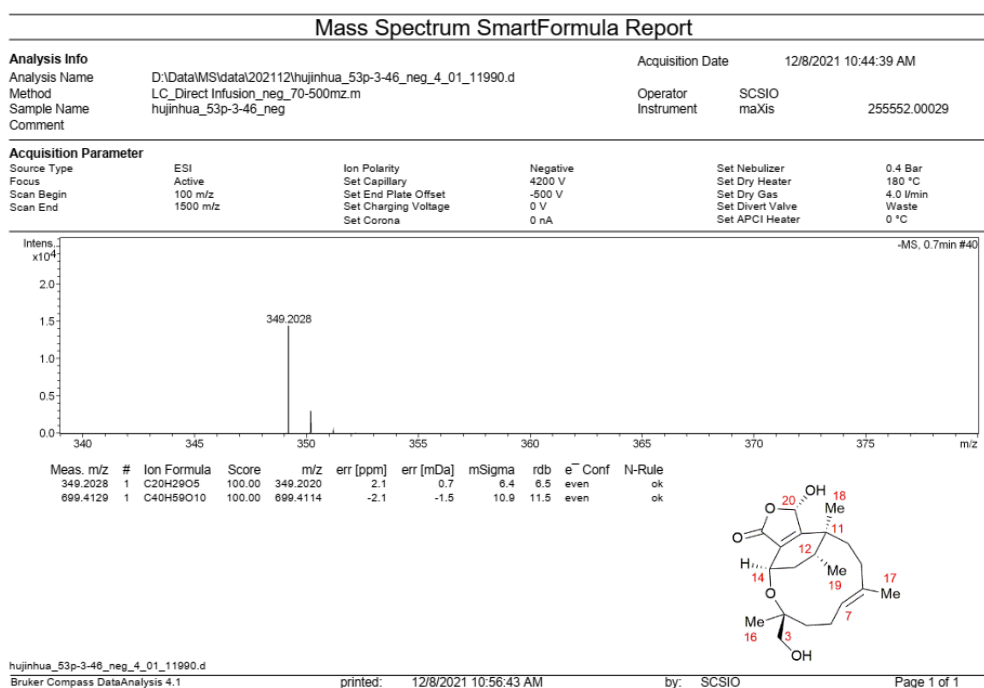

Figure S19. HRESIMS spectrum of **2**.

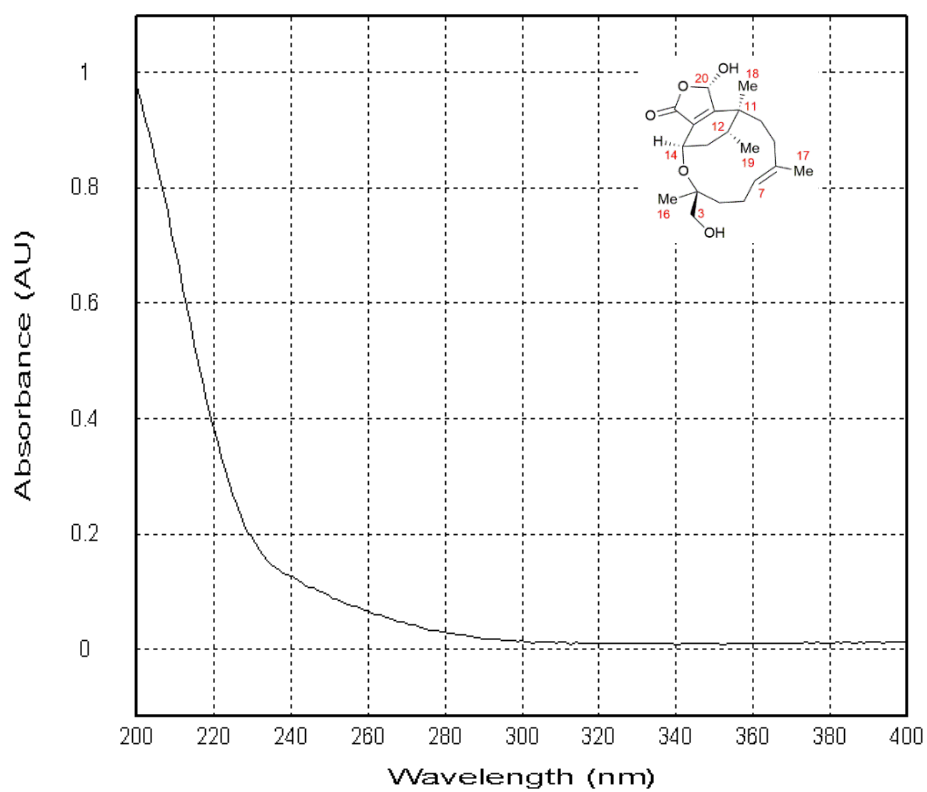

Figure S20. UV spectrum of 2.

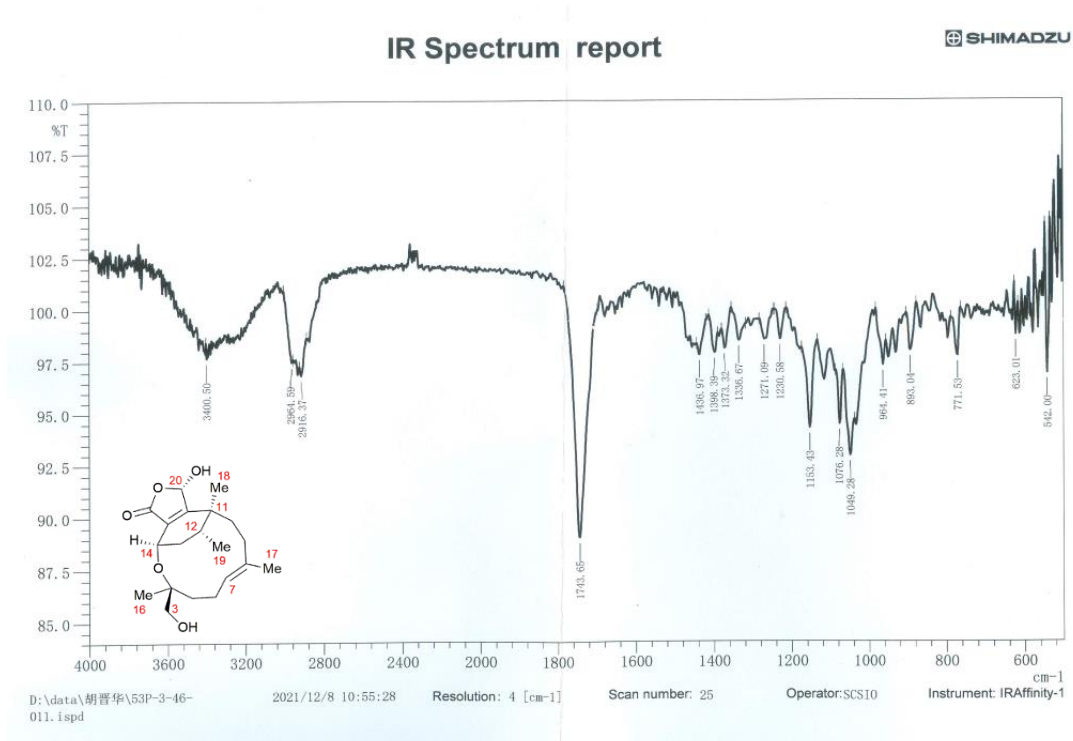

Figure S21. IR spectrum of 2.



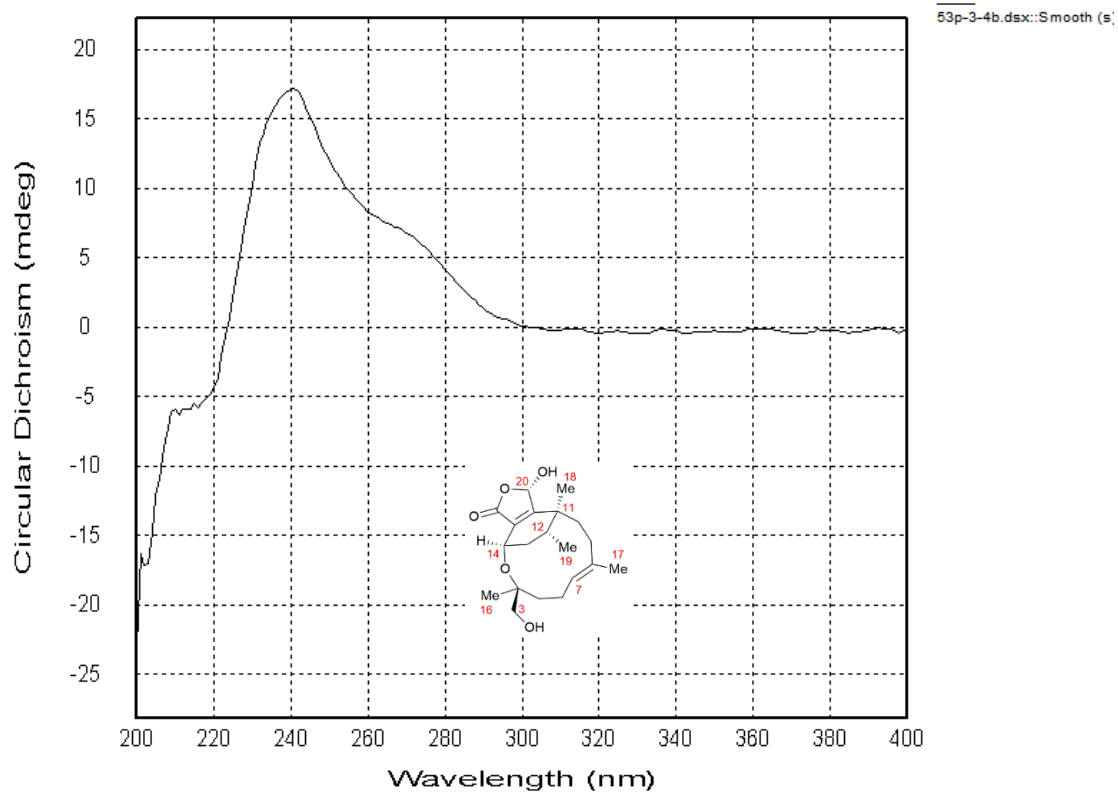

Figure S22. CD spectrum of 2.

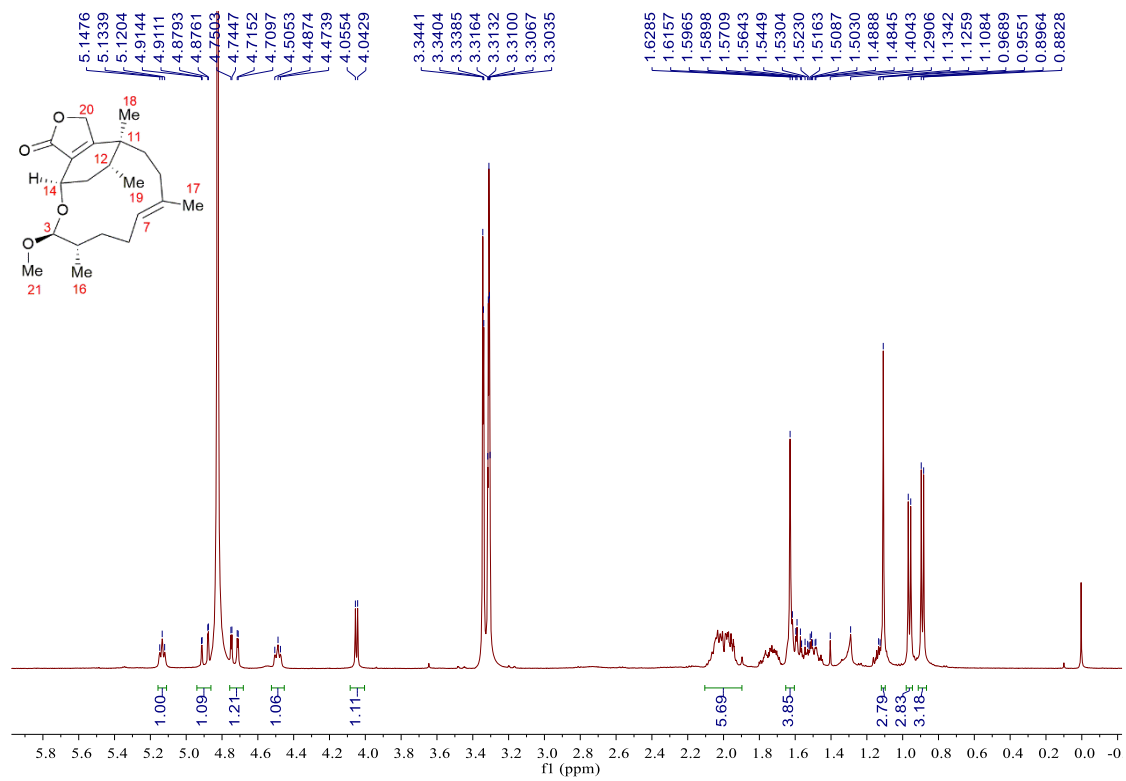

Figure S23.  $^1\text{H}$  NMR spectrum (500 MHz,  $\text{CD}_3\text{OD}$ ) of 3.

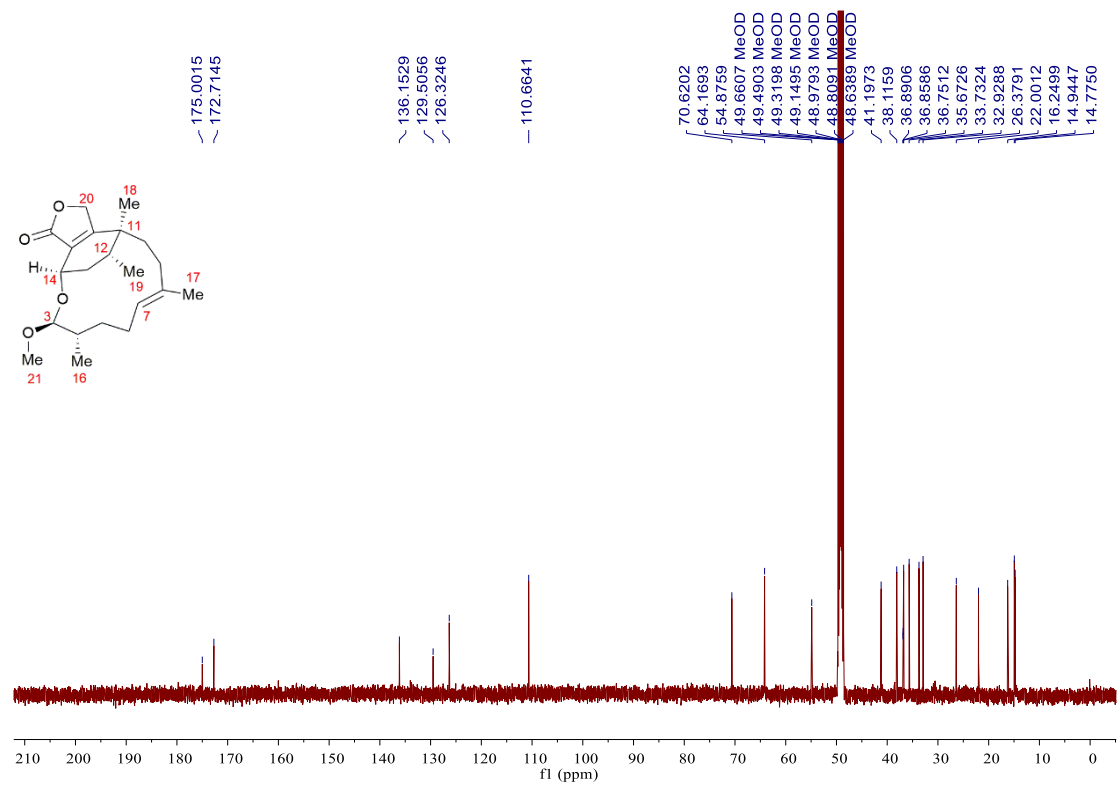

Figure S24.  $^{13}\text{C}$  NMR spectrum (125 MHz,  $\text{CD}_3\text{OD}$ ) of **3**.

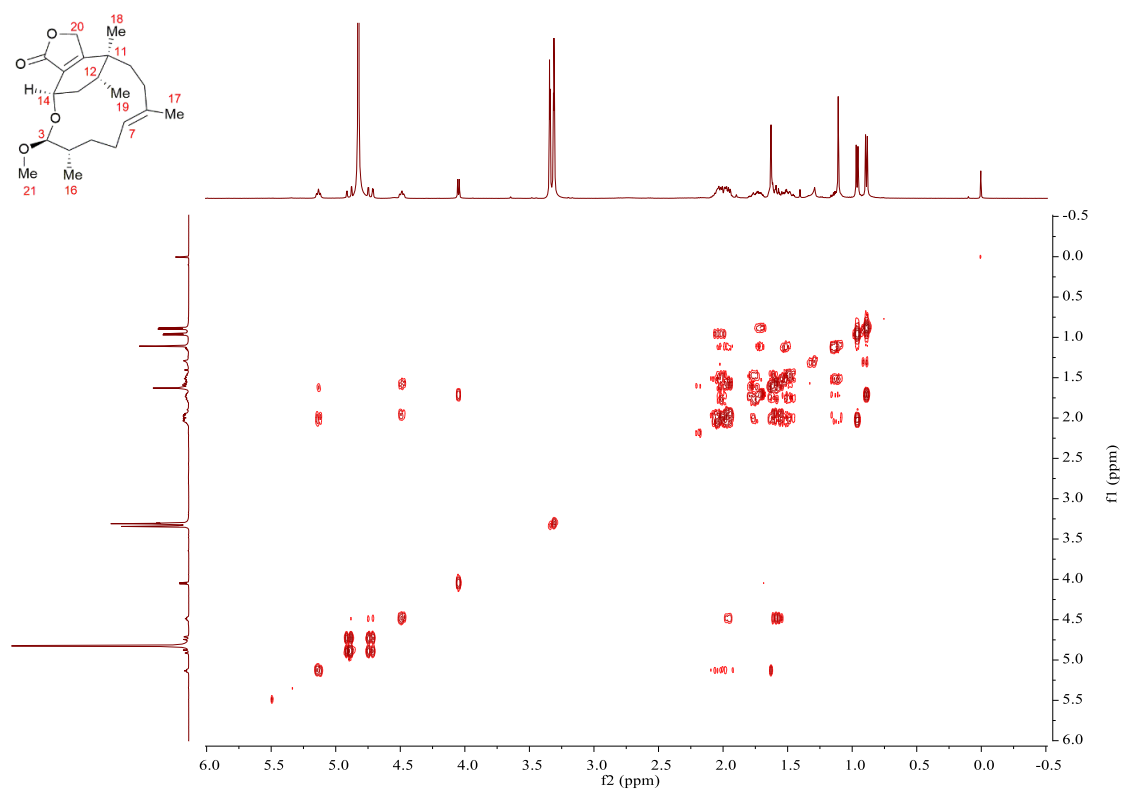

Figure S25.  $^1\text{H}$ - $^1\text{H}$  COSY spectrum of **3**.

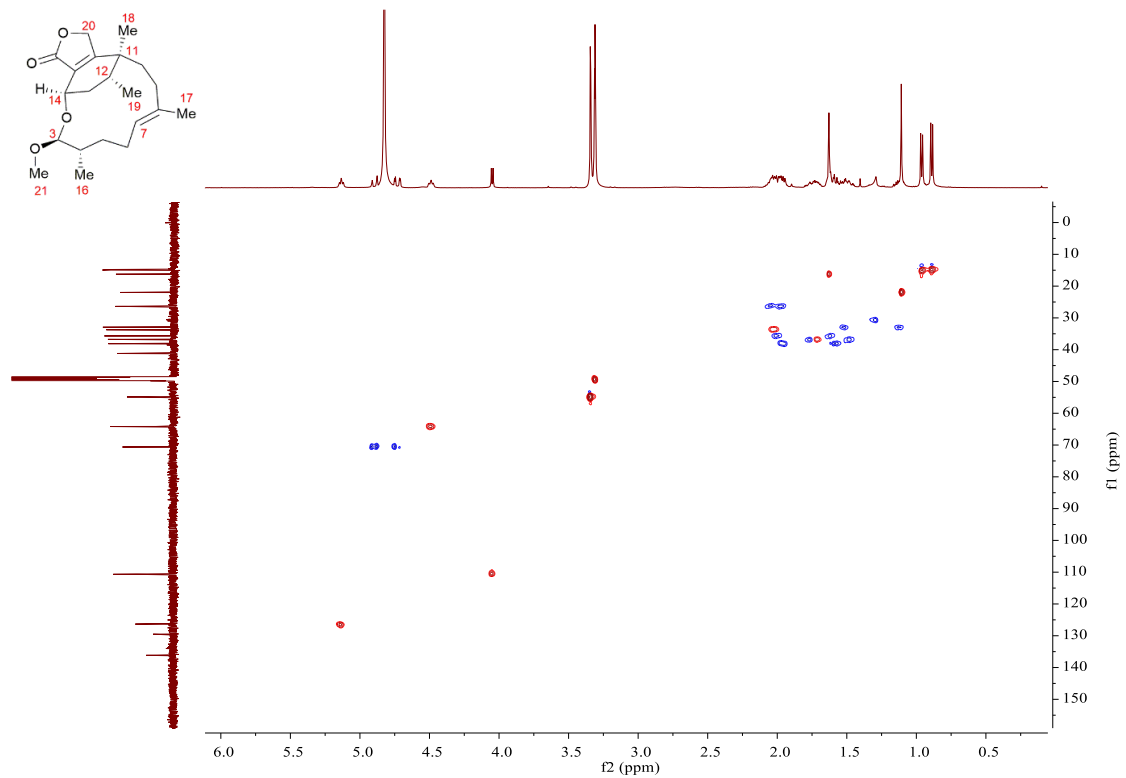

Figure S26. HSQC spectrum of **3**.

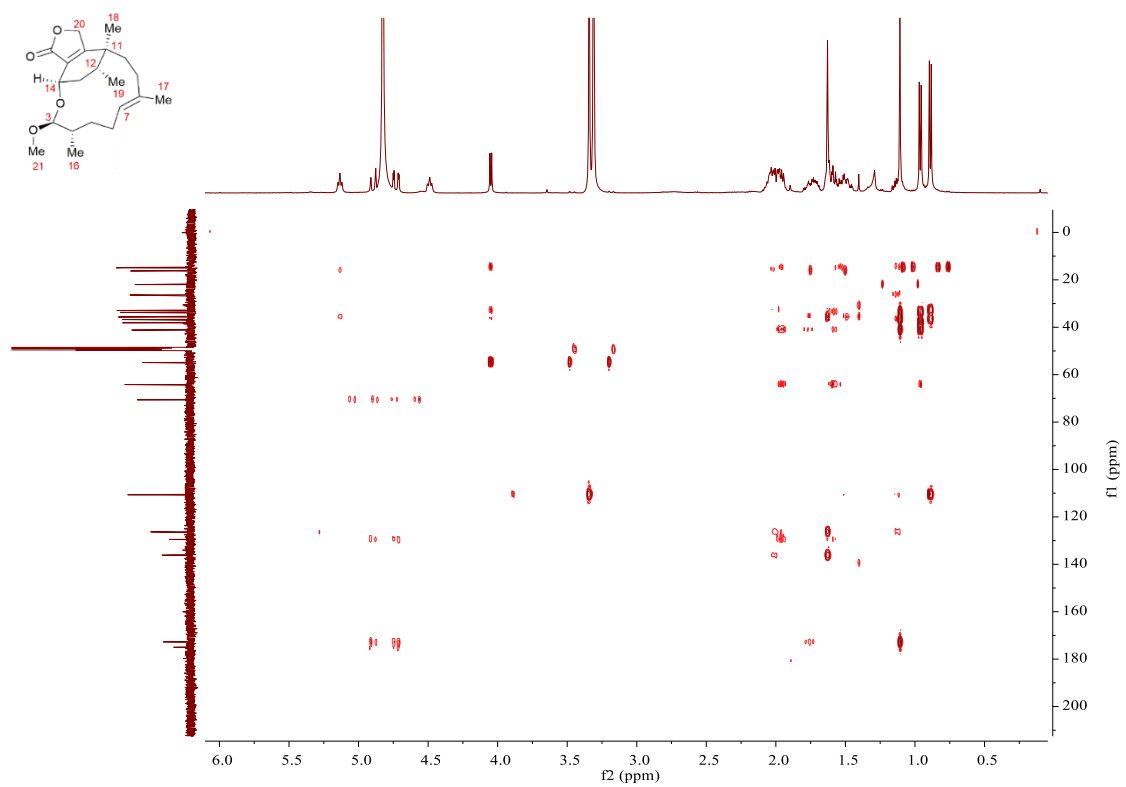

Figure S27. HMBC spectrum of **3**.

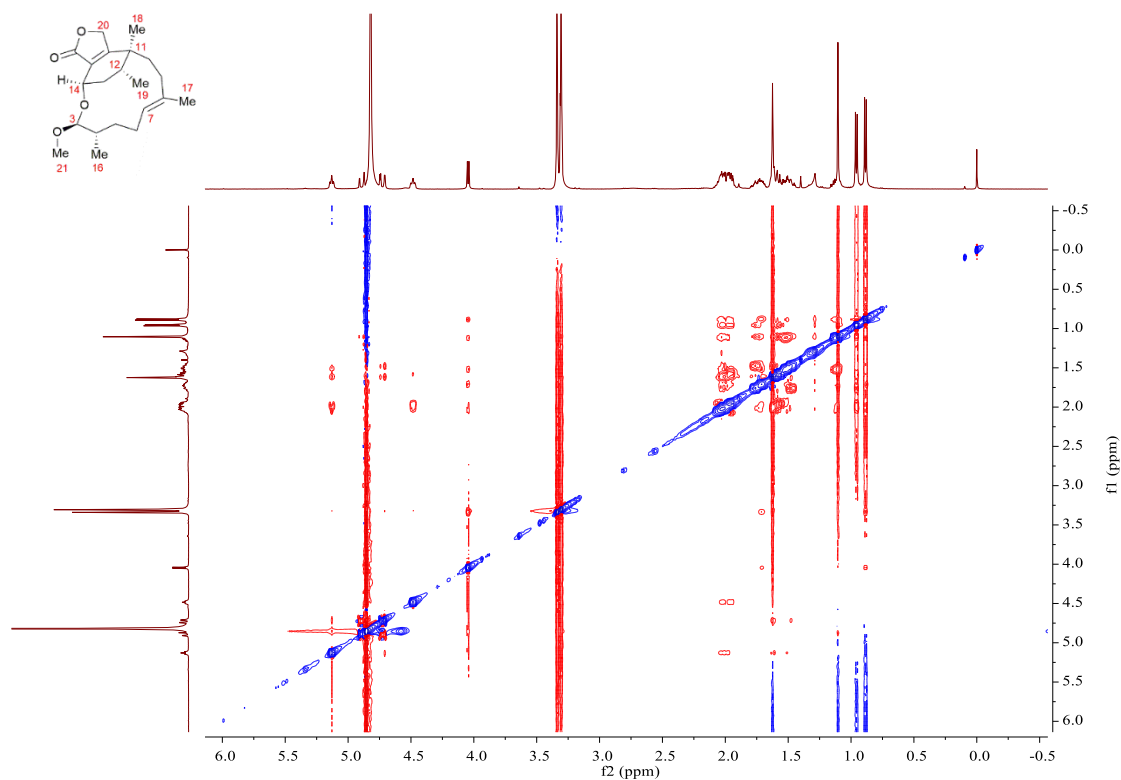

Figure S28. NOESY spectrum of **3**.

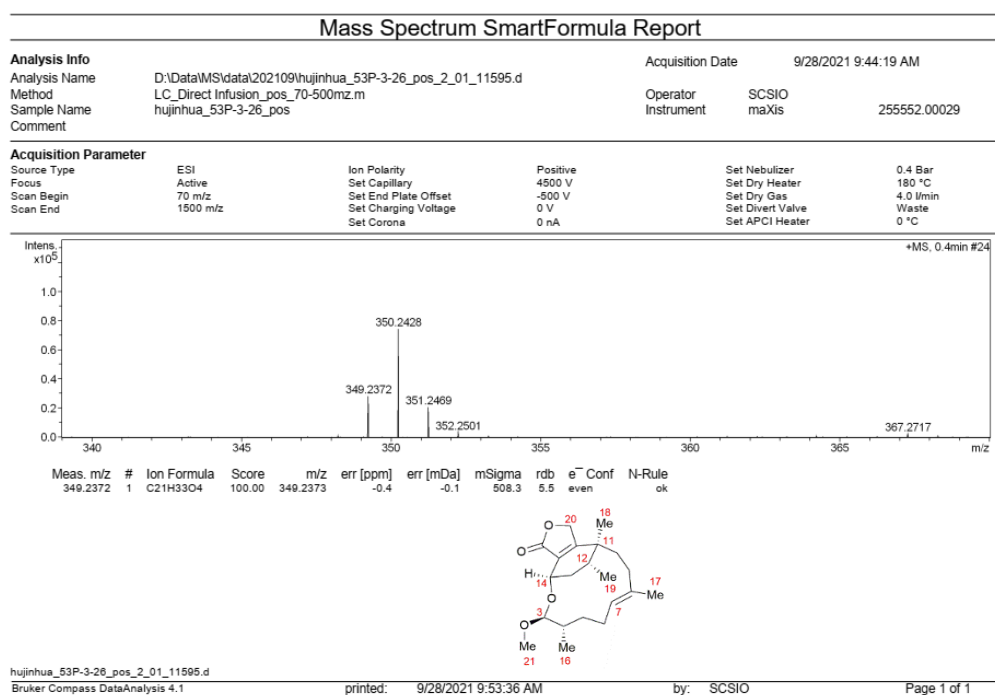

Figure S29. HRESIMS spectrum of **3**.

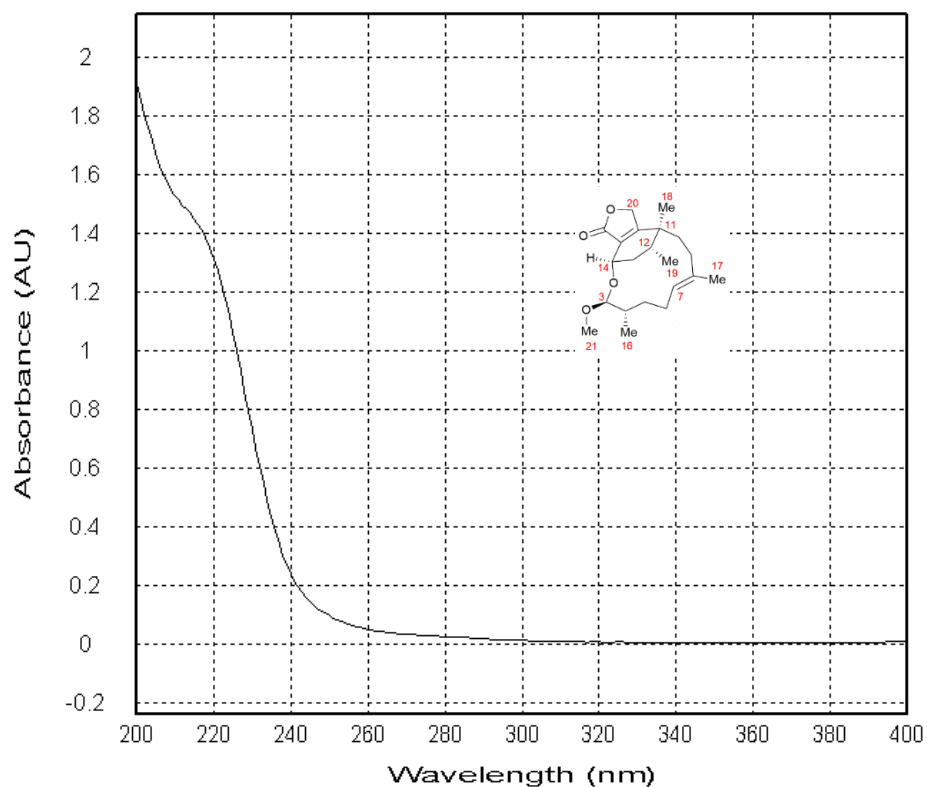

Figure S30. UV spectrum of 3.

## IR Spectrum report

SHIMADZU

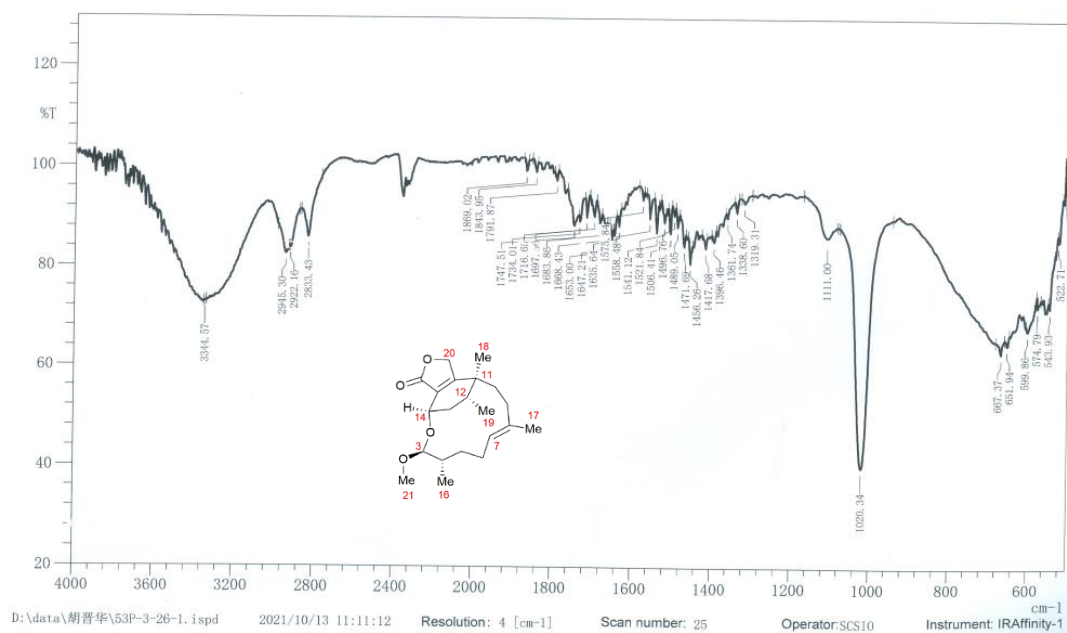

D:\data\胡晋华\53P-3-26-1.i.spd 2021/10/13 11:11:12 Resolution: 4 [cm<sup>-1</sup>] Scan number: 25 Operator:SCS10 Instrument: IRAffinity-1

Figure S31. IR spectrum of 3.

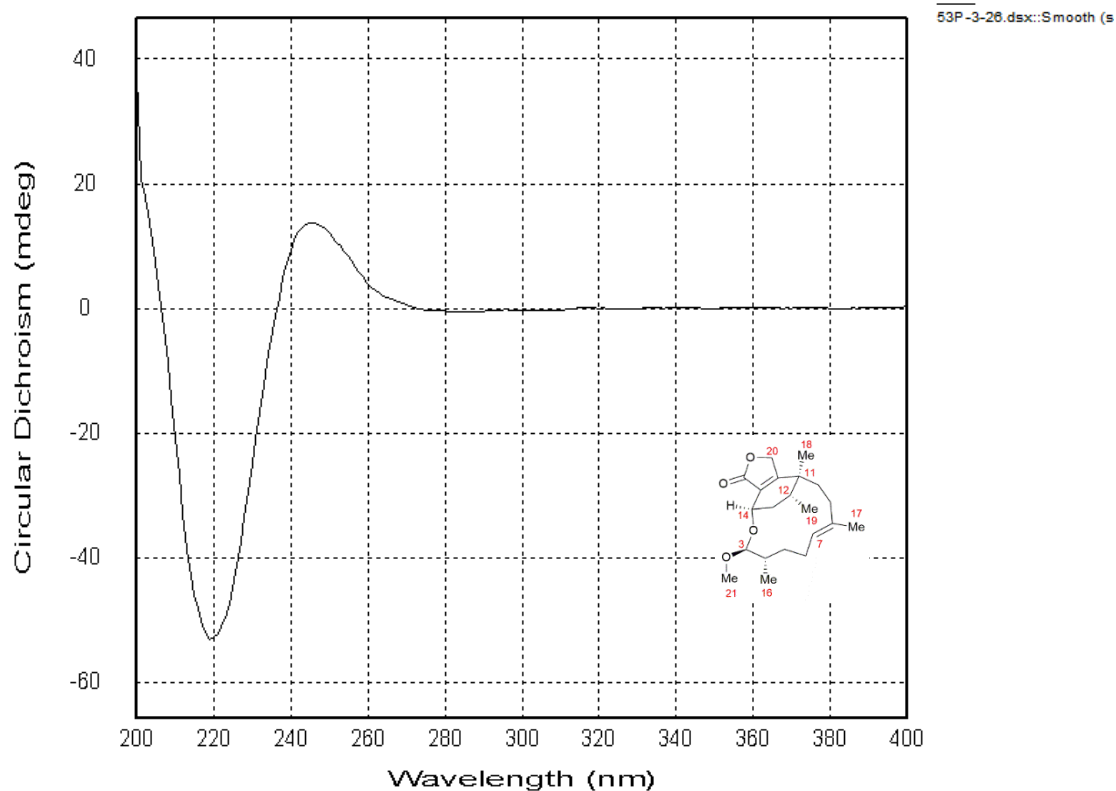

Figure S32. CD spectrum of 3.

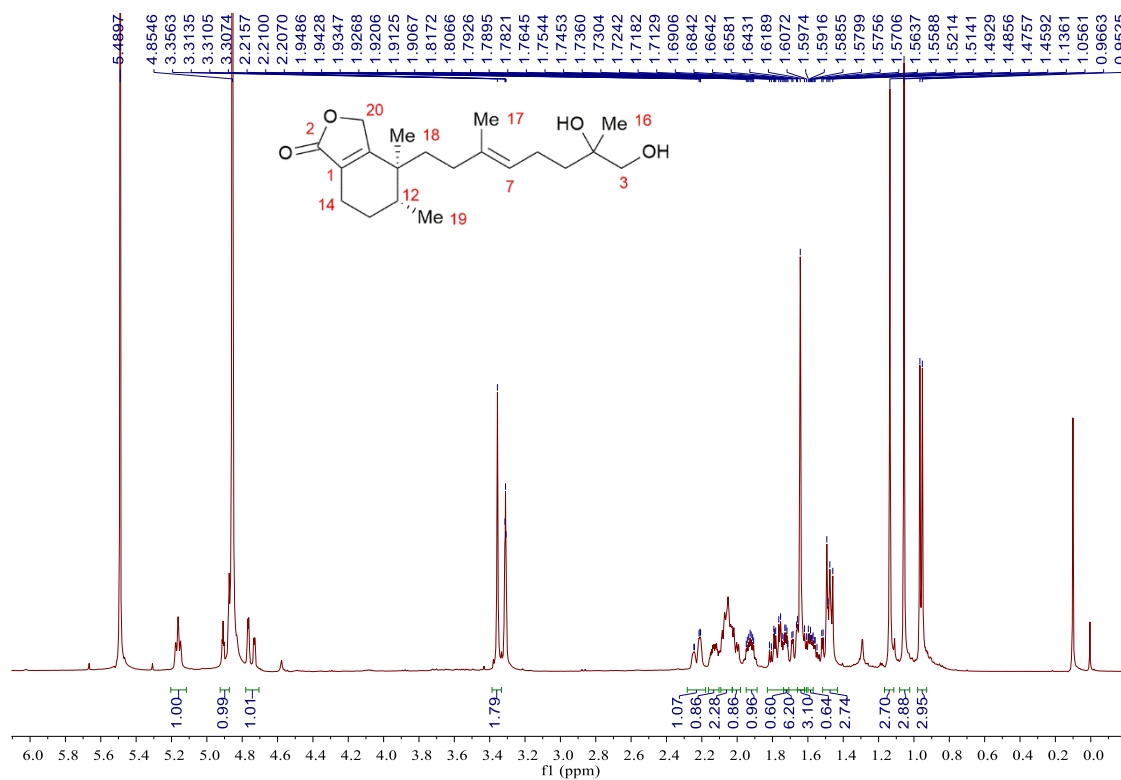

Figure S33.  $^1\text{H}$  NMR spectrum (500 MHz,  $\text{CD}_3\text{OD}$ ) of 4.

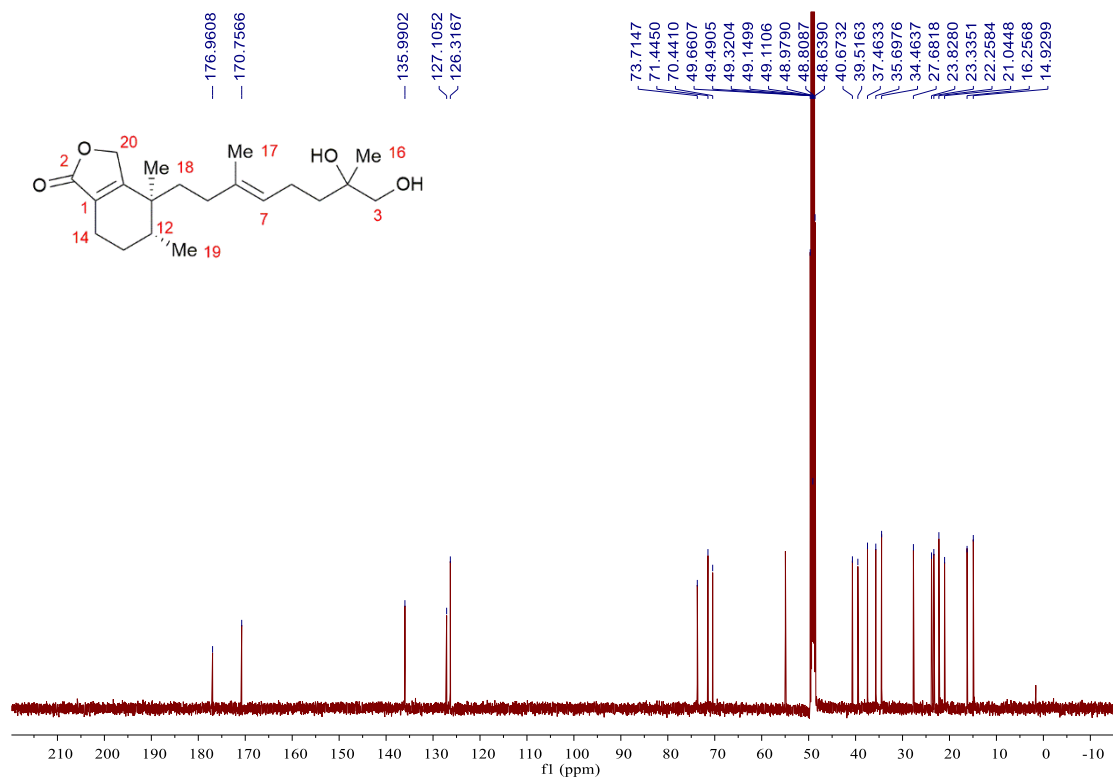

Figure S34.  $^{13}\text{C}$  NMR spectrum (125 MHz,  $\text{CD}_3\text{OD}$ ) of 4.

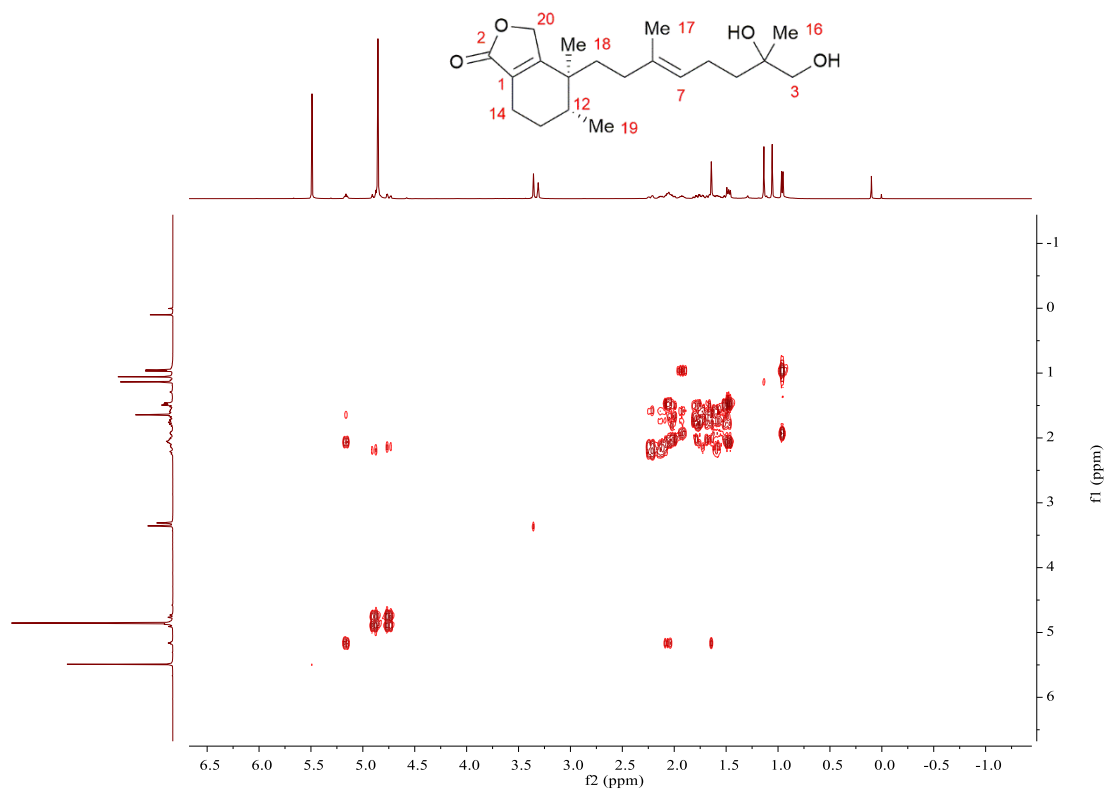

Figure S35.  $^1\text{H}$ - $^1\text{H}$  COSY spectrum of 4.

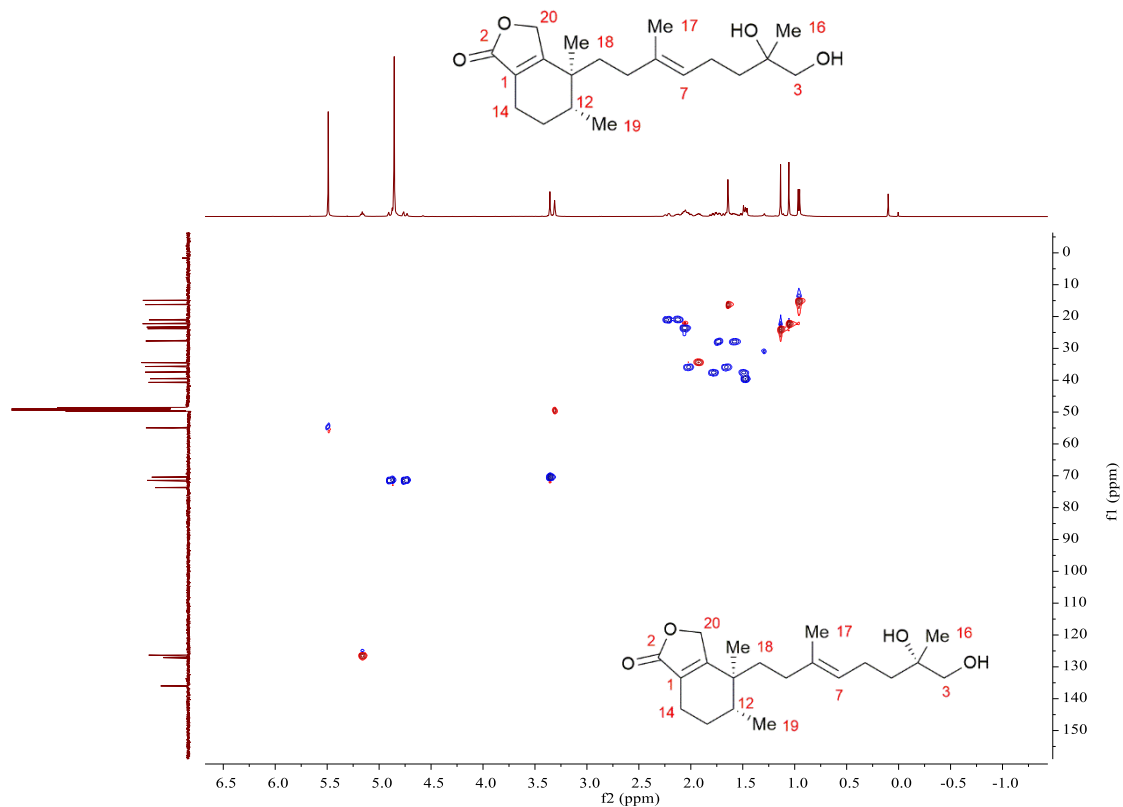

Figure S36. HSQC spectrum of **4**.

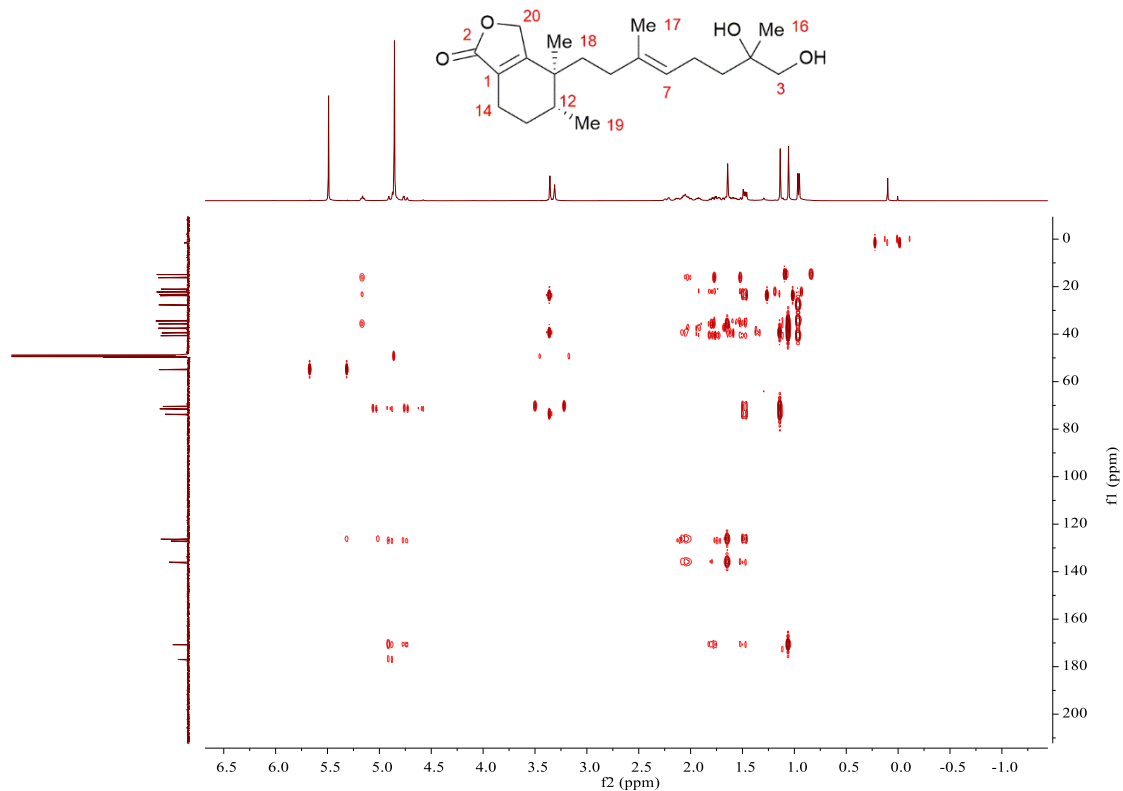

Figure S37. HMBC spectrum of **4**.



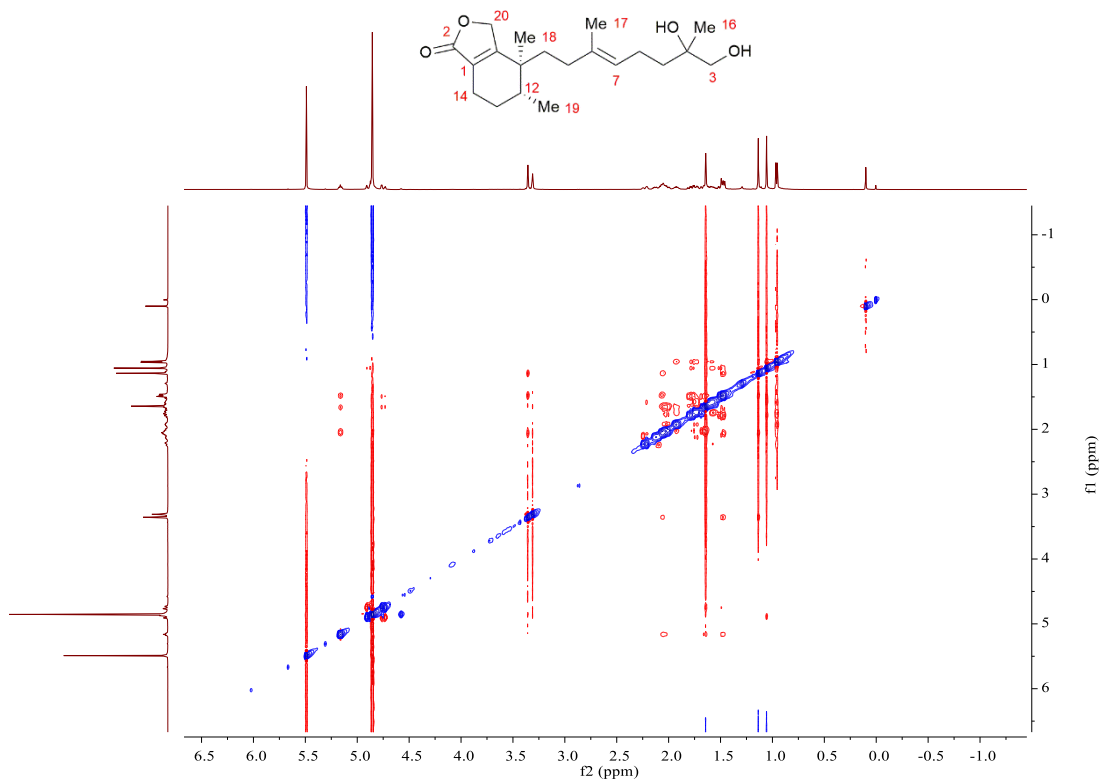

Figure S38. NOESY spectrum of 4.

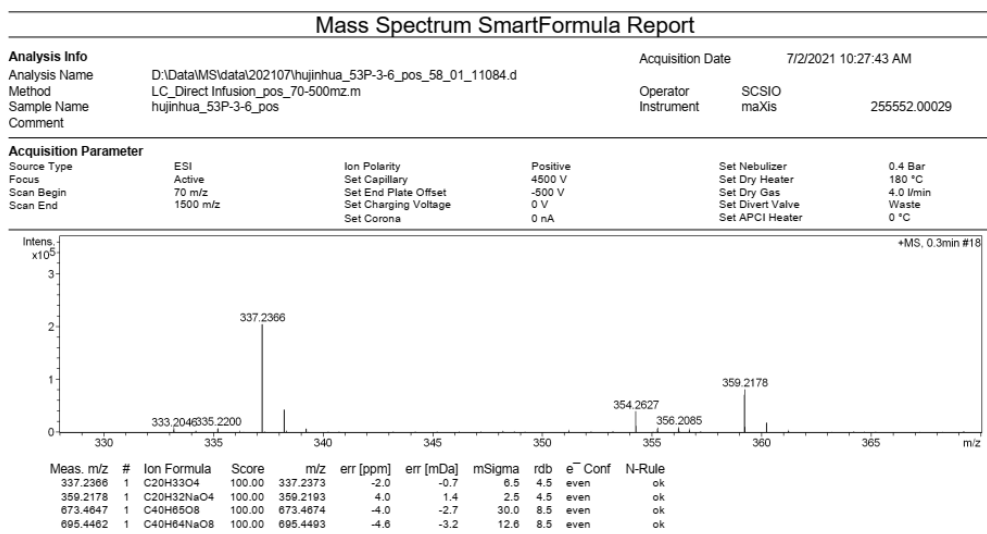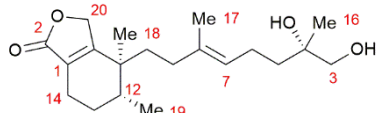

hujinhua\_53P-3-6\_pos\_58\_01\_11084.d  
Bruker Compass DataAnalysis 4.1

printed: 7/2/2021 10:35:02 AM

by: SCSIO

Page 1 of 1

Figure S39. HRESIMS spectrum of 4.

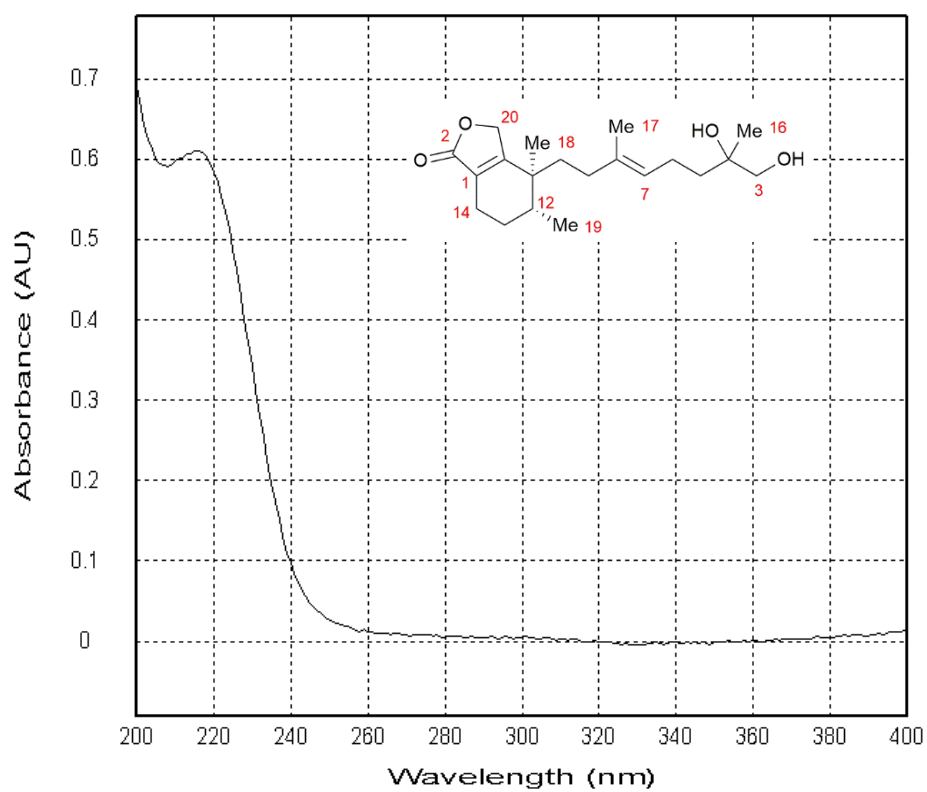

Figure S40. UV spectrum of 4.

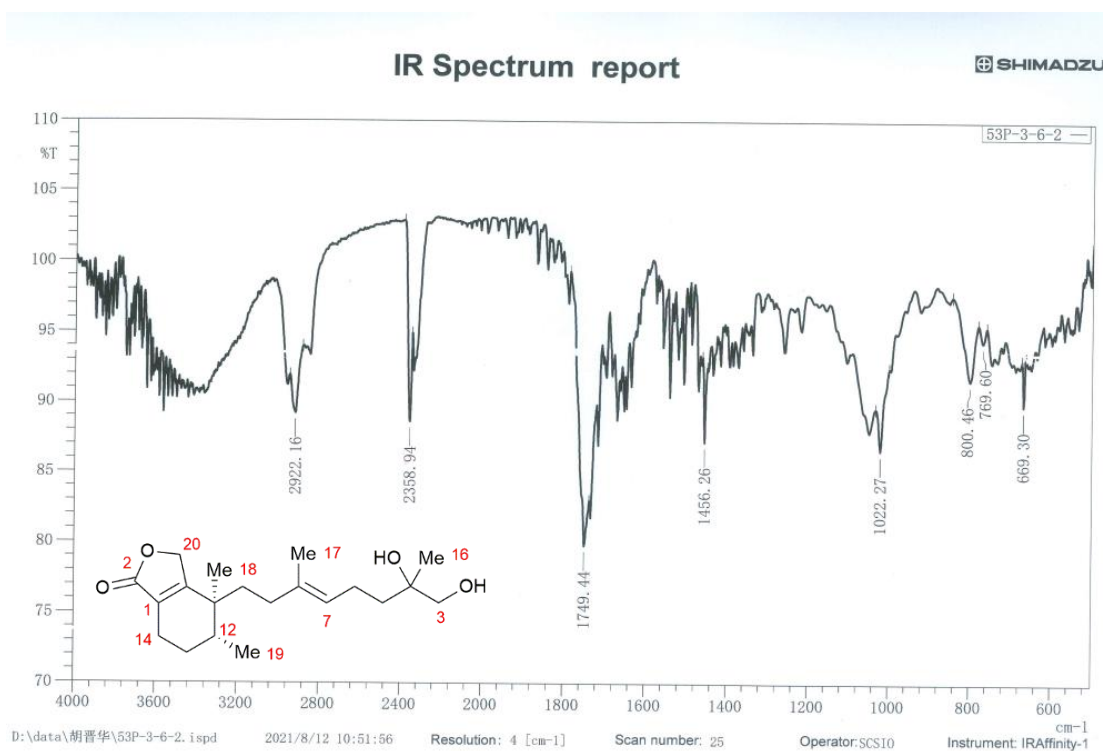

Figure S41. IR spectrum of 4.

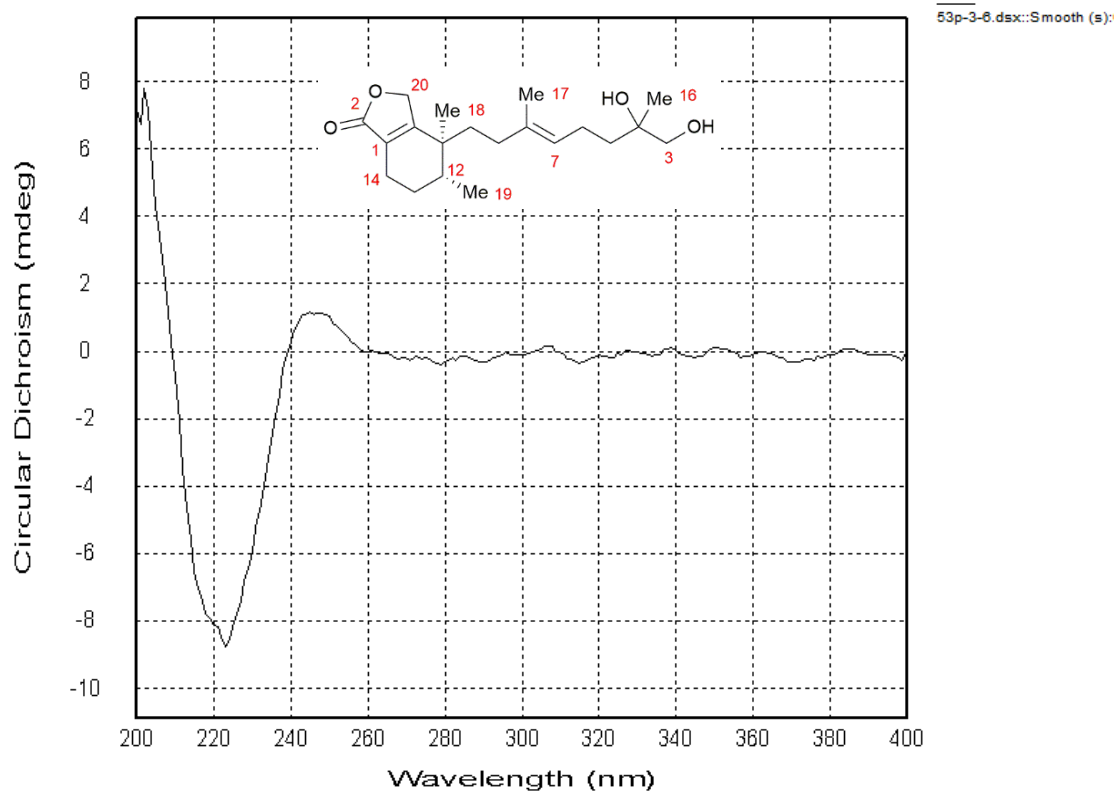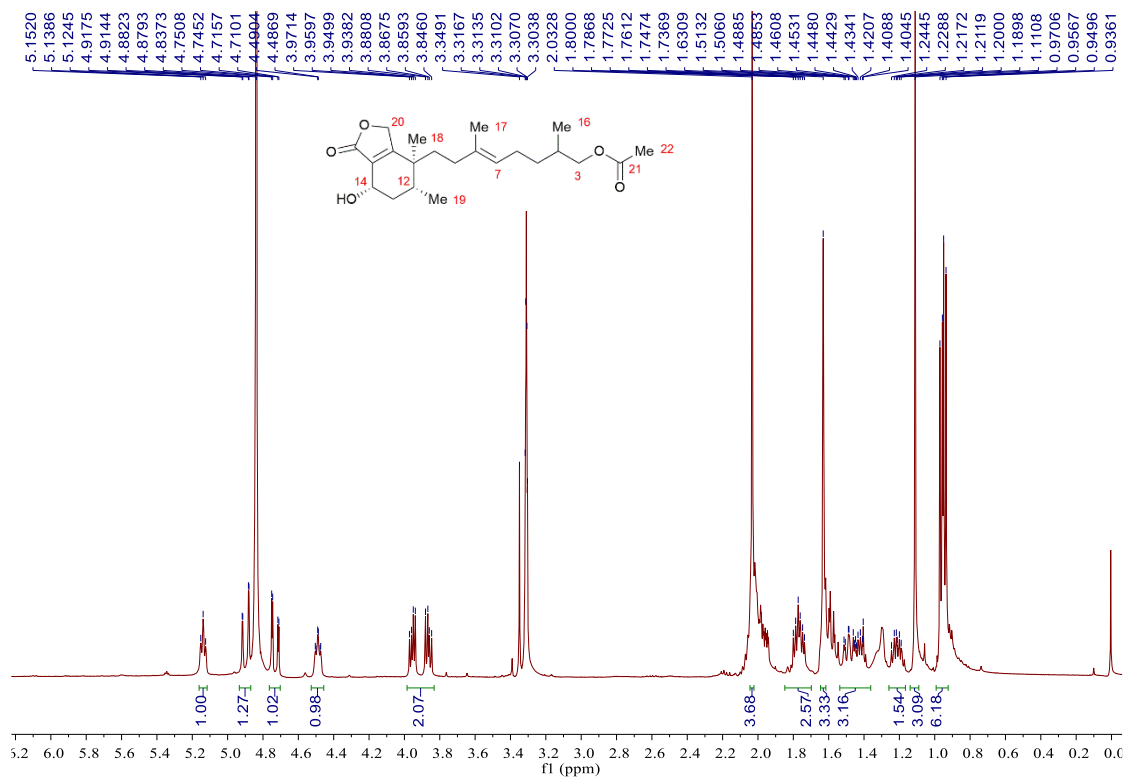

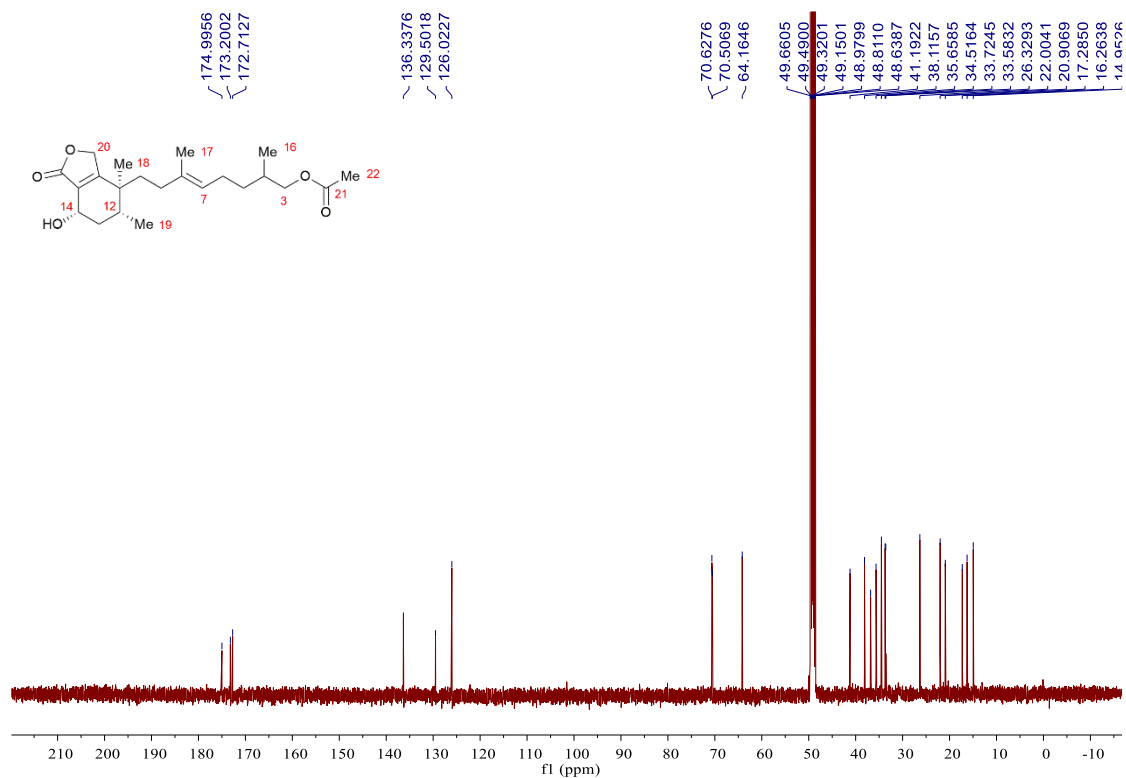

Figure S44.  $^{13}\text{C}$  NMR spectrum (125 MHz,  $\text{CD}_3\text{OD}$ ) of 5.

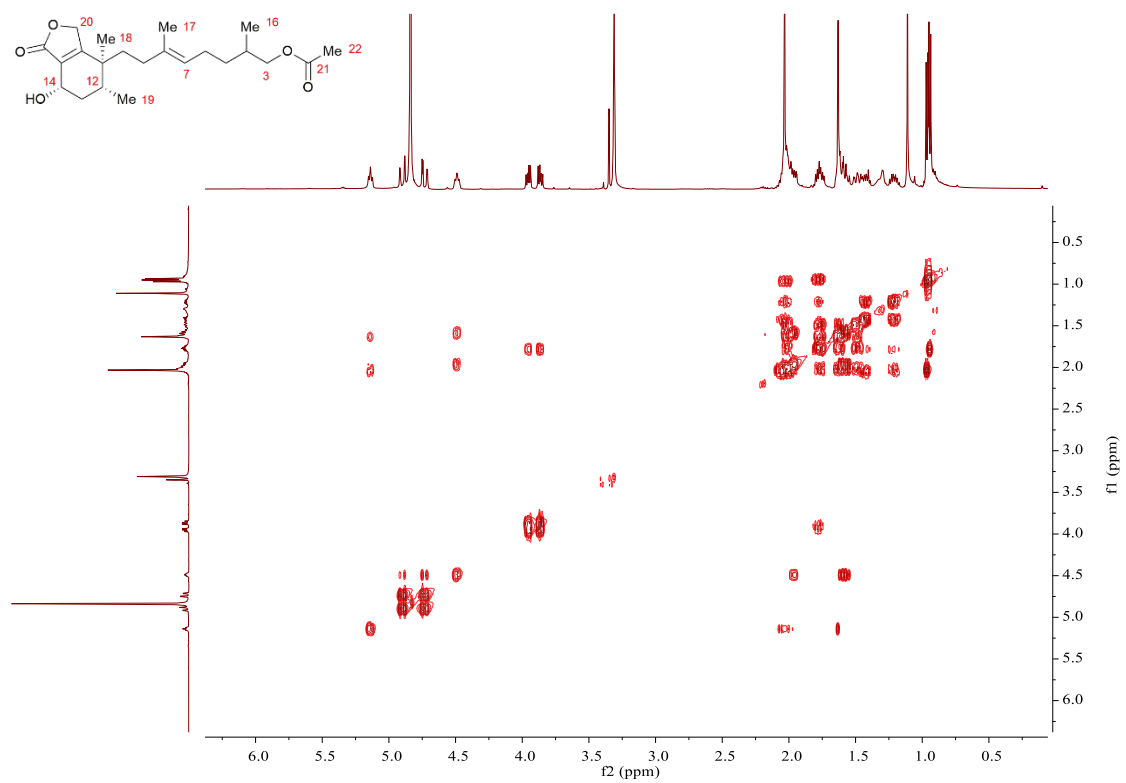

Figure S45.  $^1\text{H}$ - $^1\text{H}$  COSY spectrum of 5.

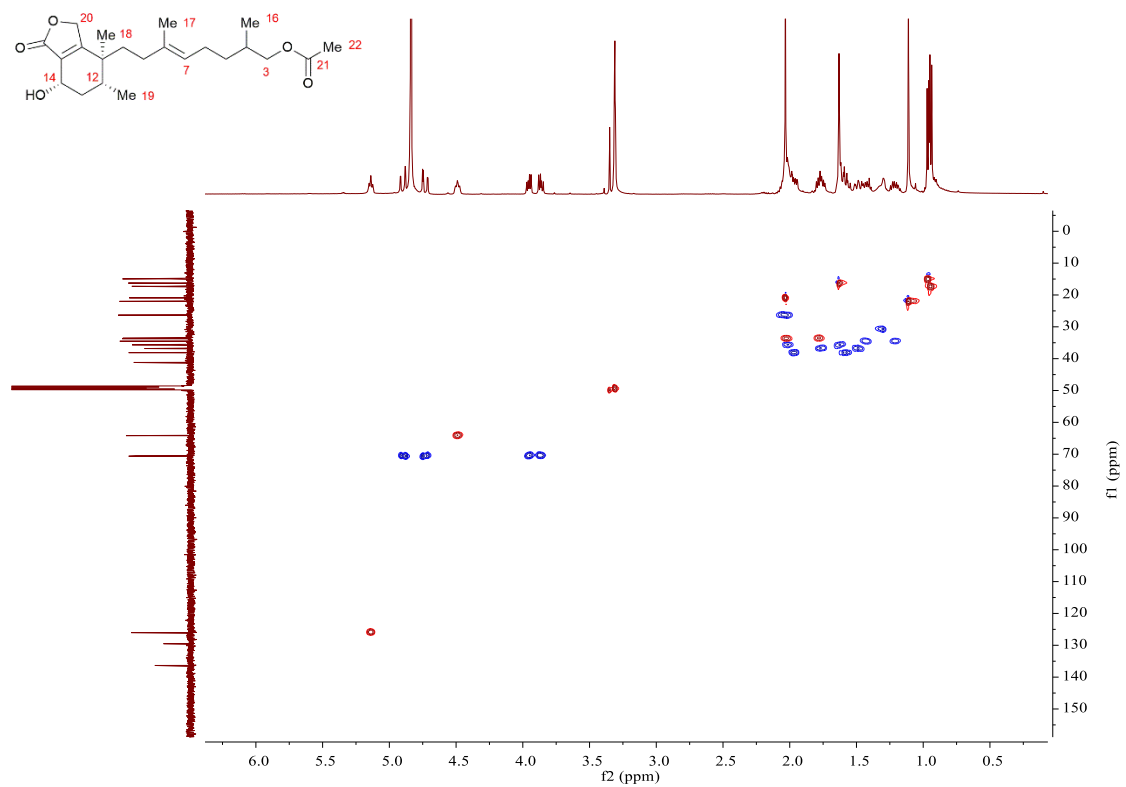

Figure S46. HSQC spectrum of 5.

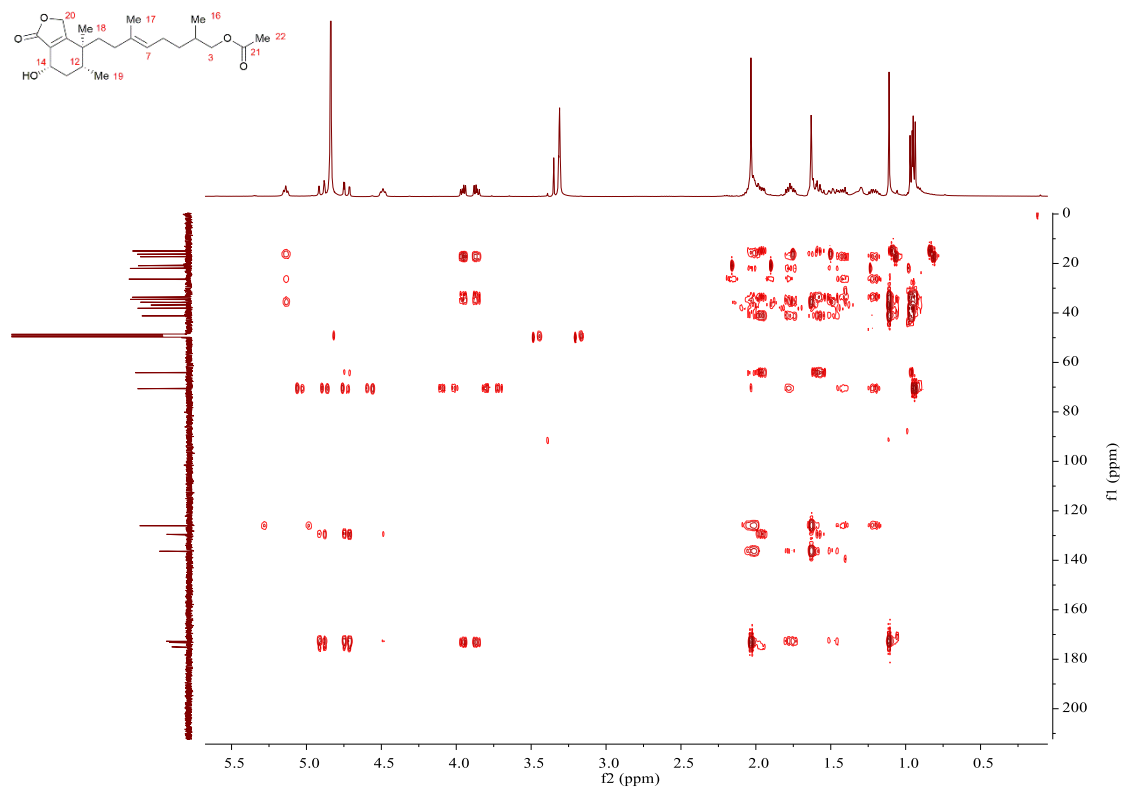

Figure S47. HMBC spectrum of 5.

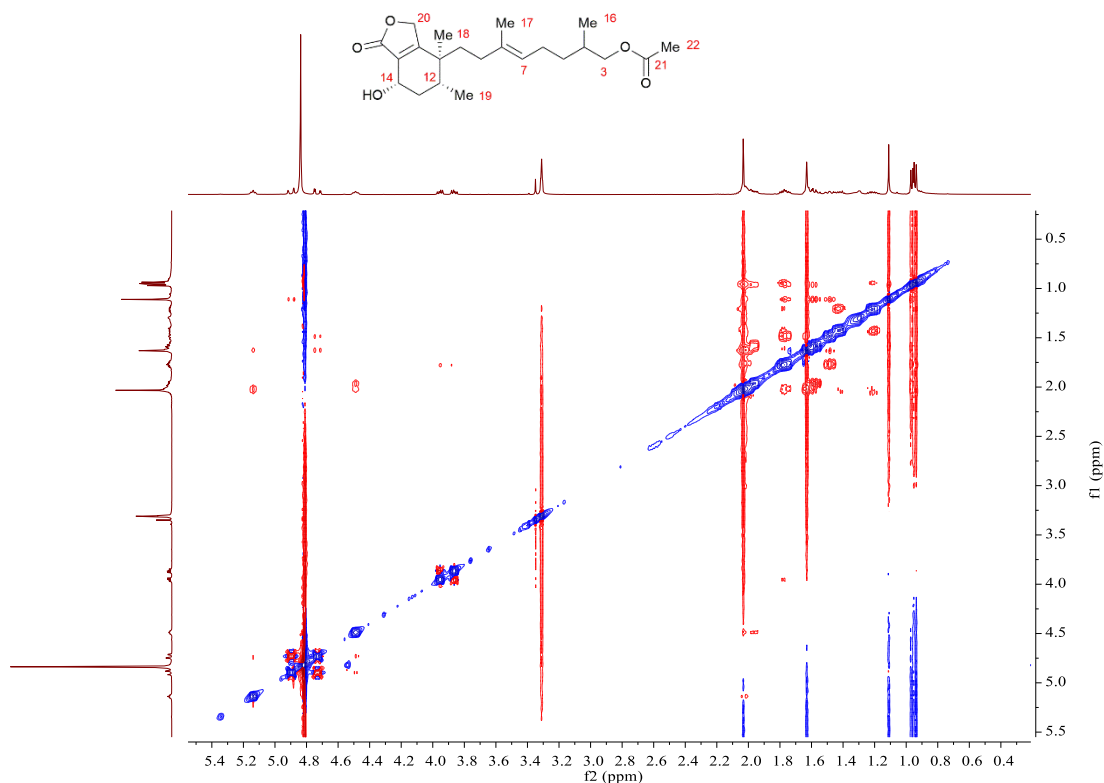

Figure S48. NOESY spectrum of 5.

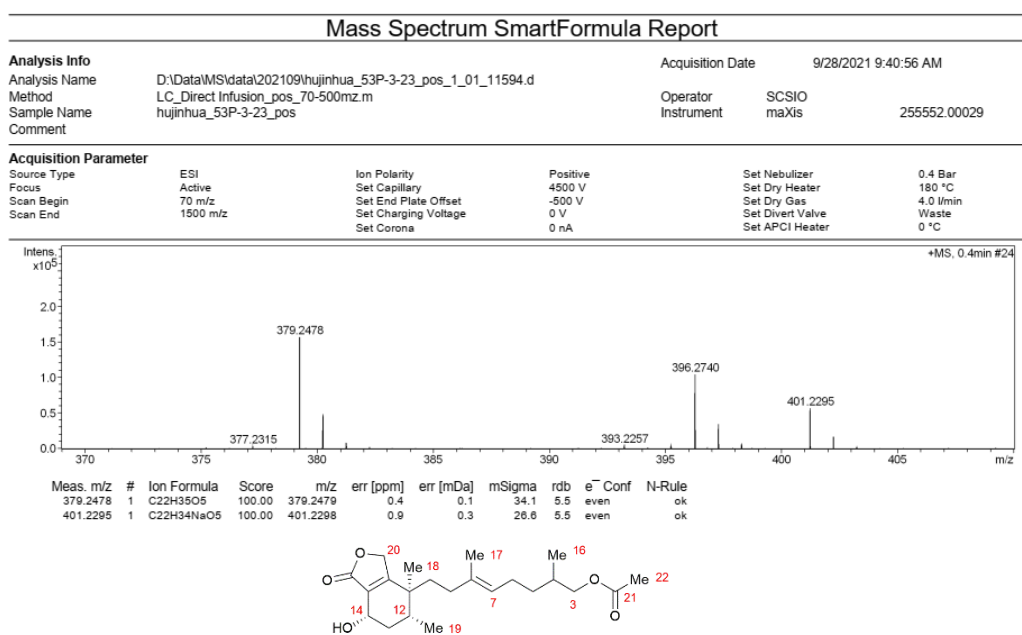

Figure S49. HRESIMS spectrum of 5.

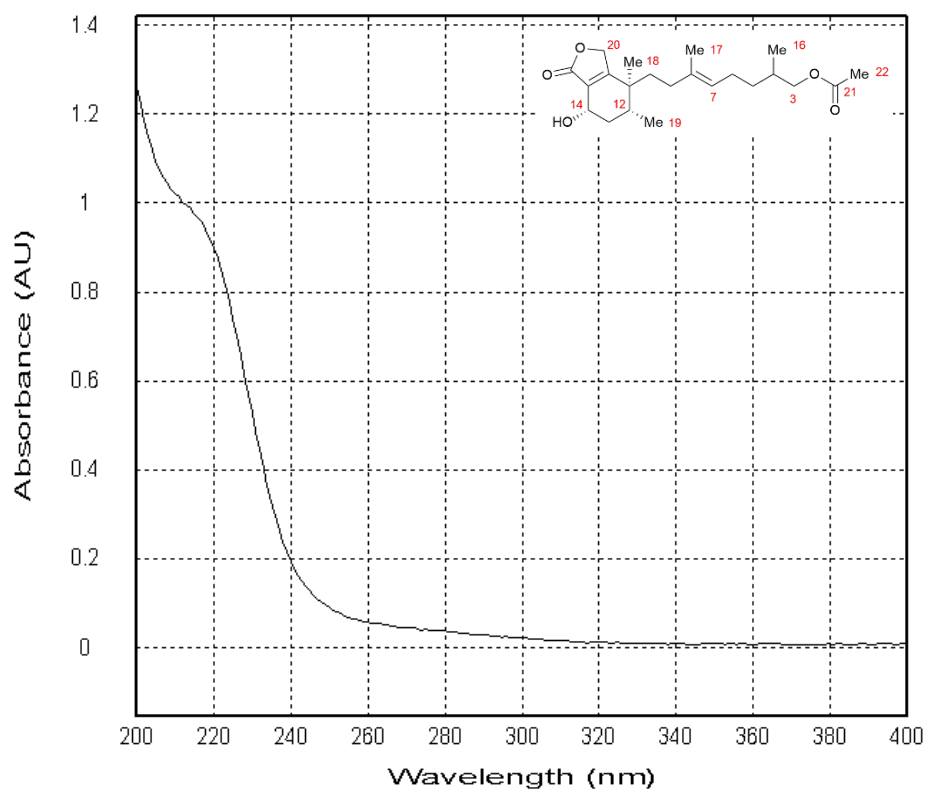

Figure S50. UV spectrum of 5.

## IR Spectrum report

SHIMADZU

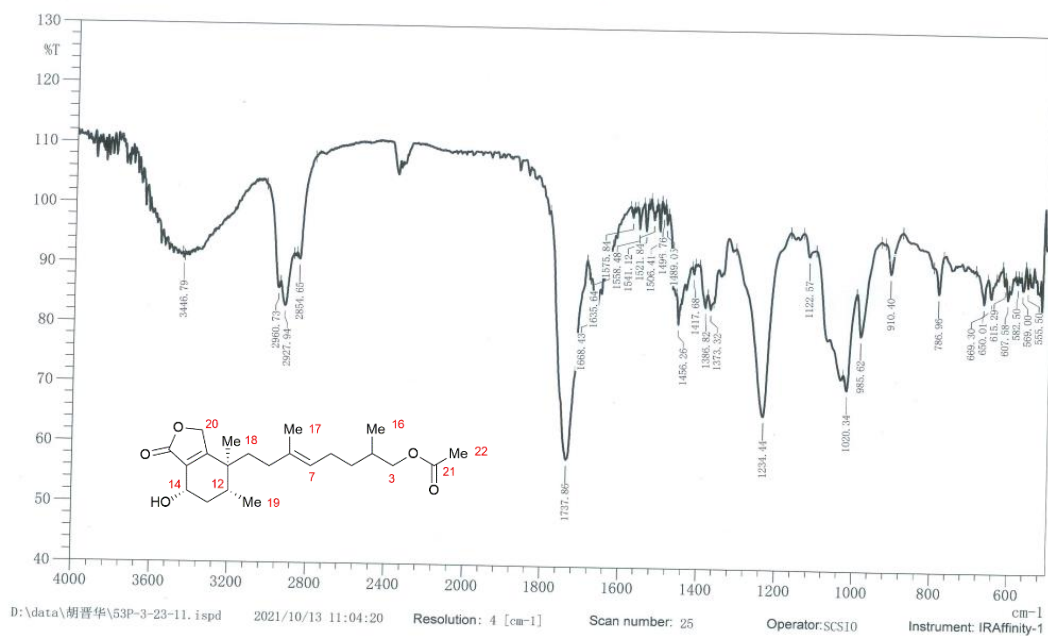

Figure S51. IR spectrum of 5.

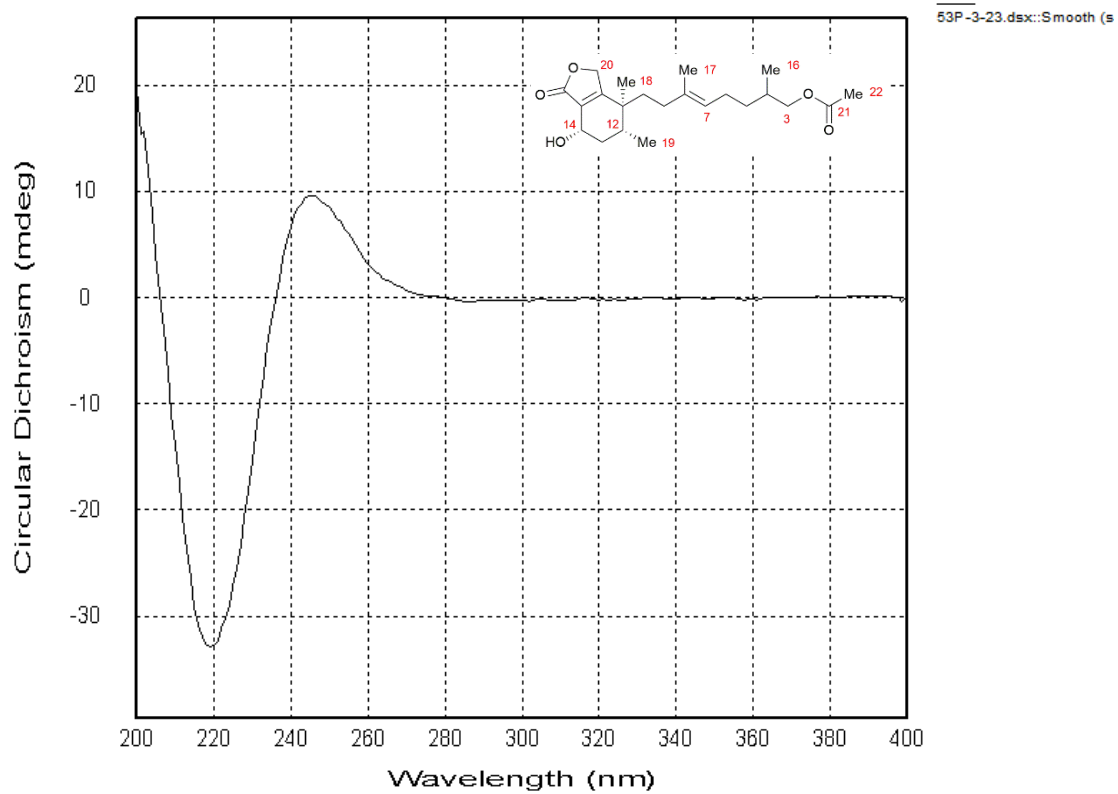

Figure S52. CD spectrum of 5.

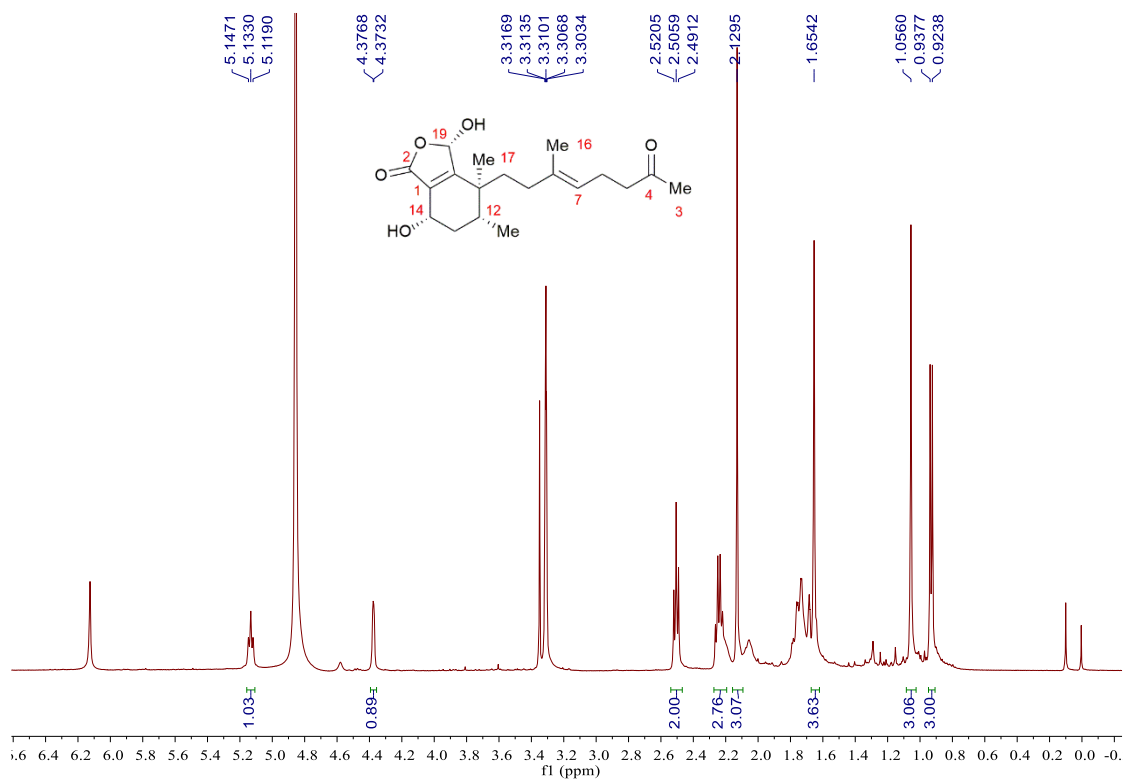

Figure S53.  $^1\text{H}$  NMR spectrum (500 MHz,  $\text{CD}_3\text{OD}$ ) of 6.



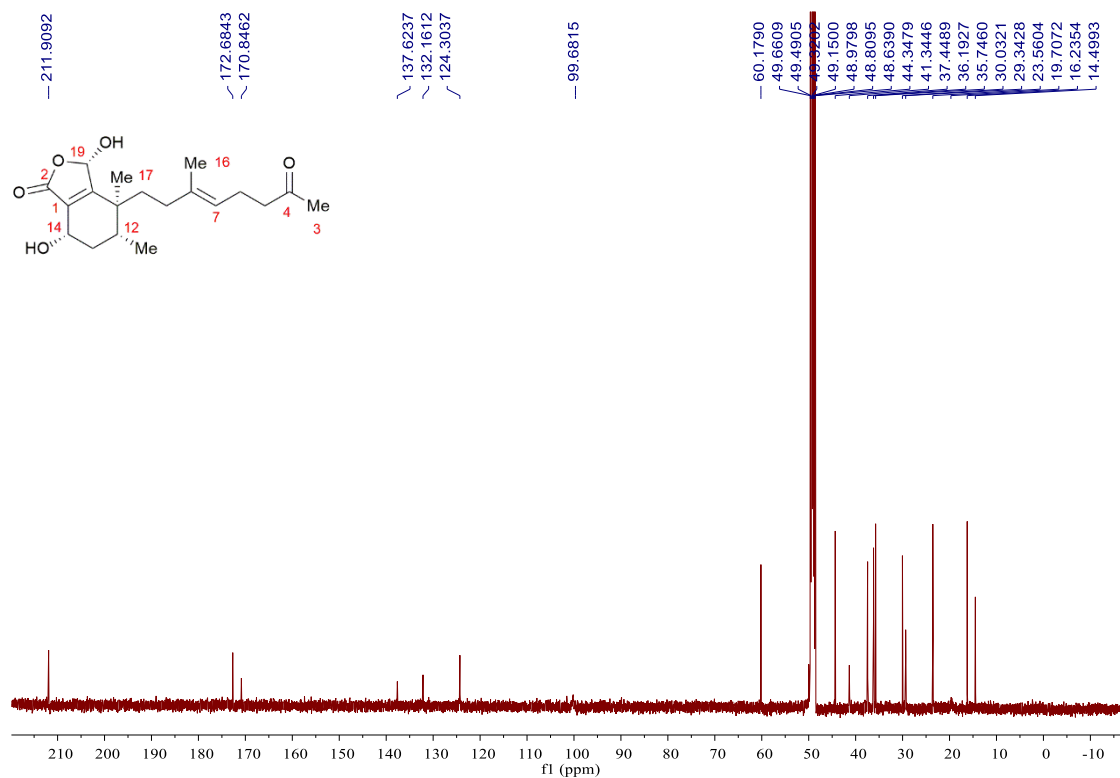

Figure S54.  $^{13}\text{C}$  NMR spectrum (125 MHz,  $\text{CD}_3\text{OD}$ ) of 6.

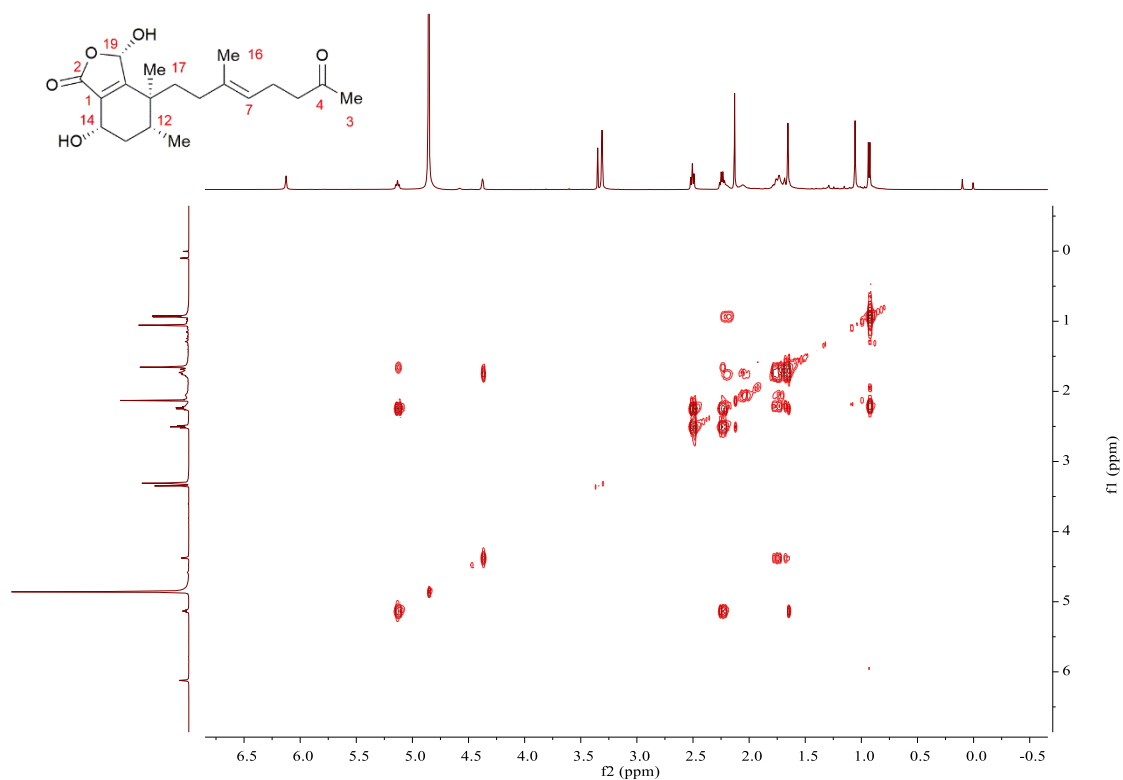

Figure S55.  $^1\text{H}$ - $^1\text{H}$  COSY spectrum of 6.

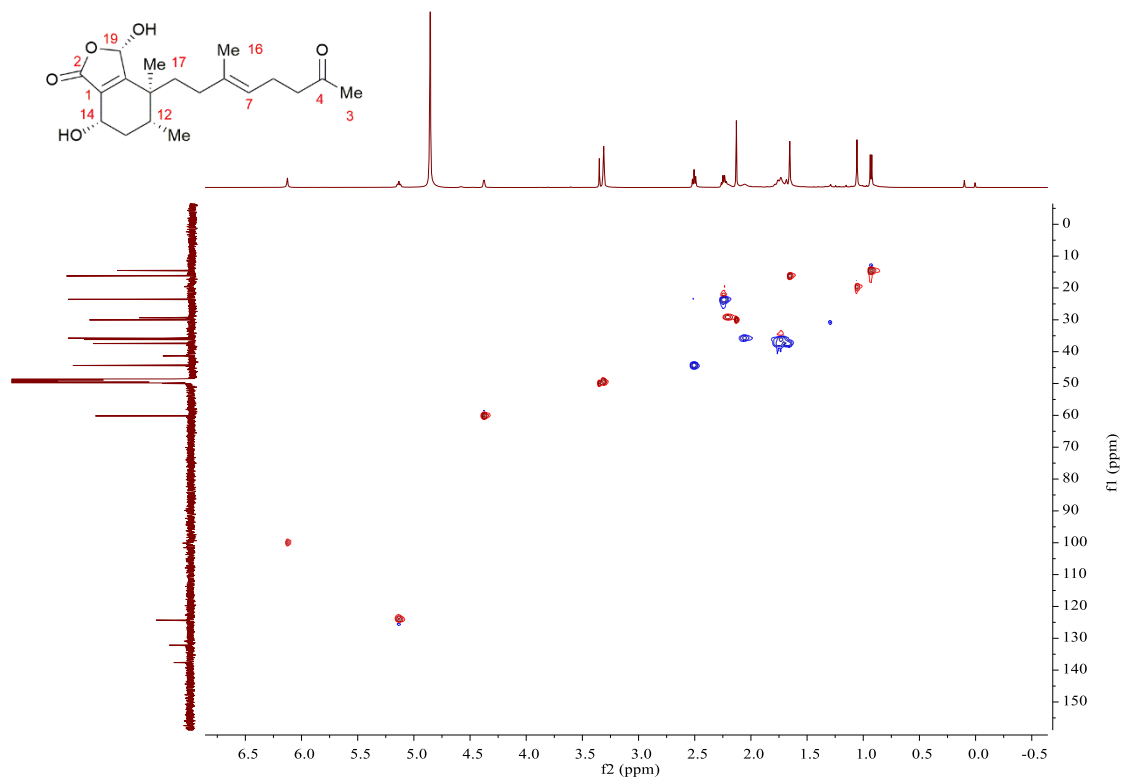

Figure S56. HSQC spectrum of **6**.

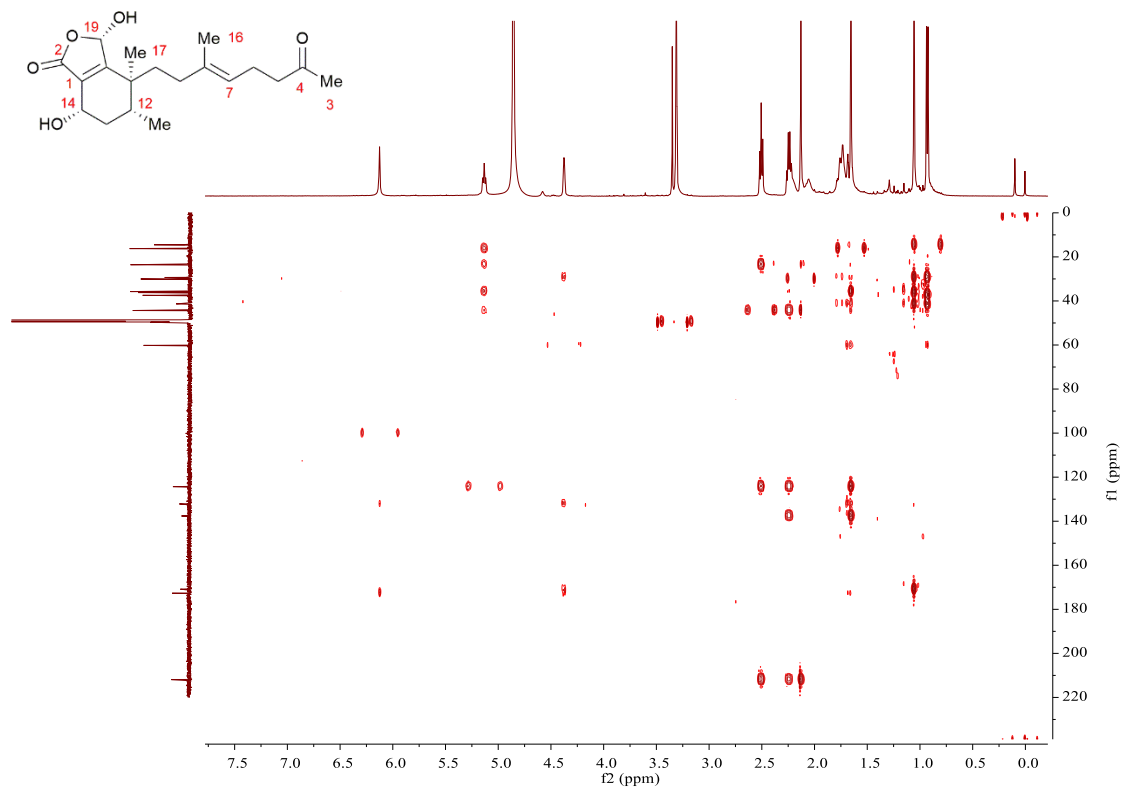

Figure S57. HMBC spectrum of **6**.

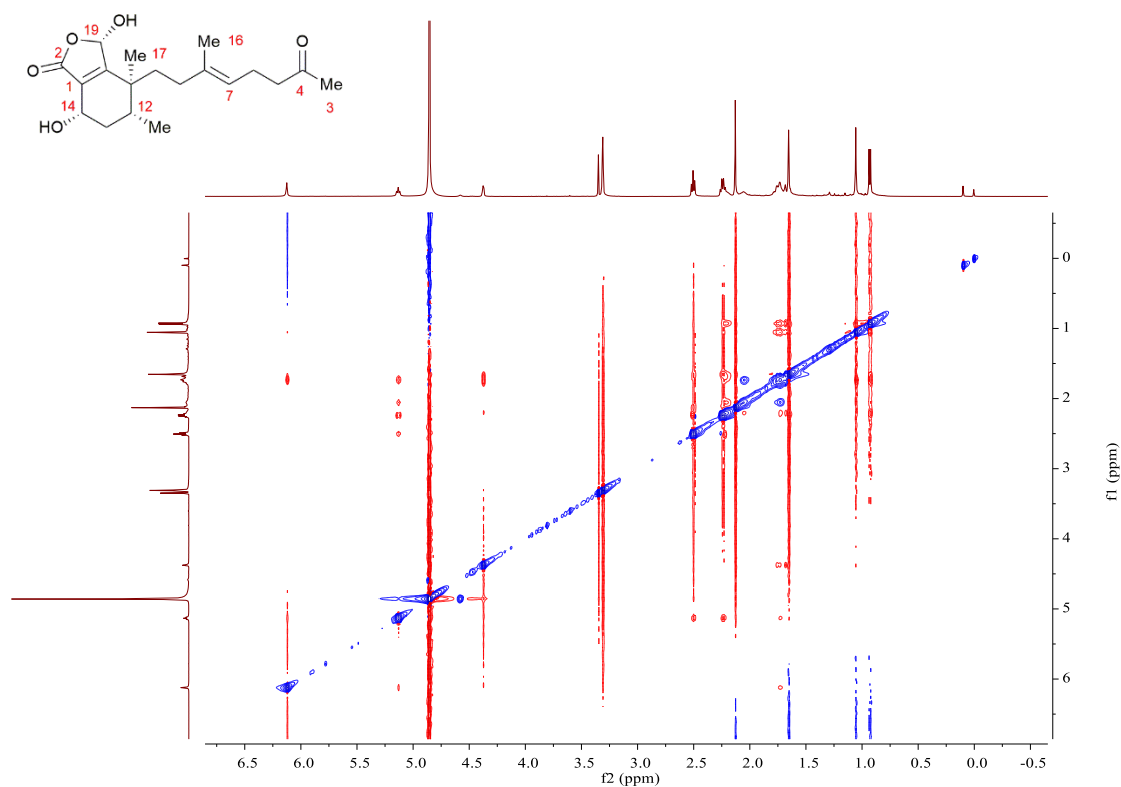

Figure S58. NOESY spectrum of **6**.

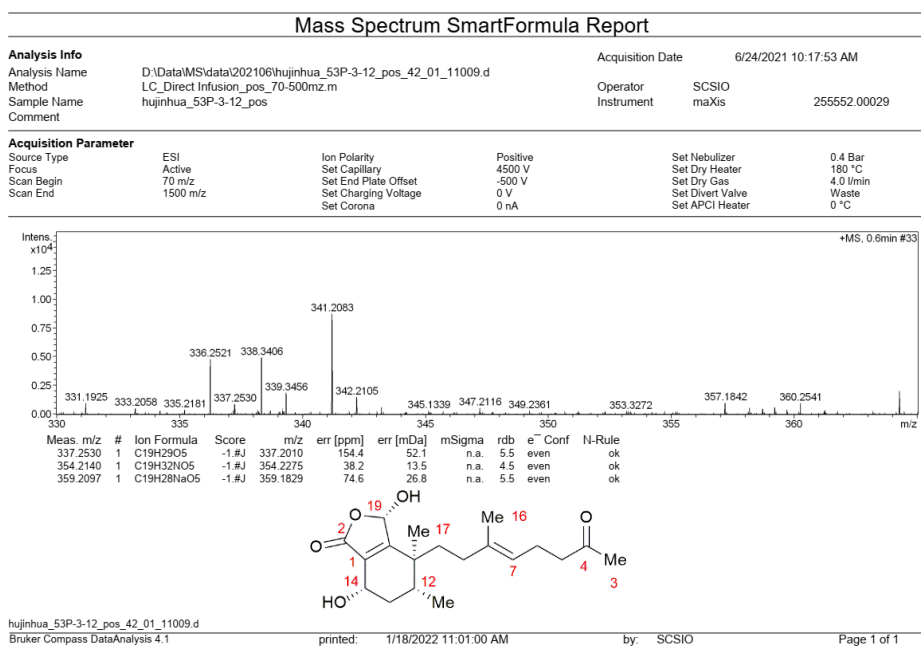

Figure S59. HRESIMS spectrum of **6**.

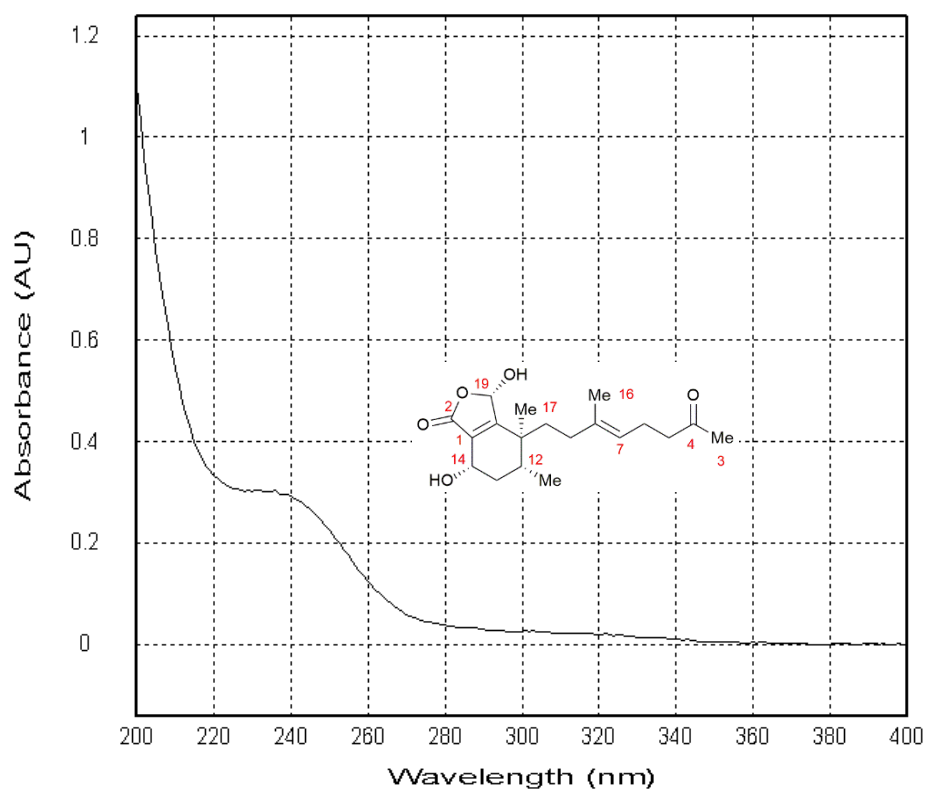

Figure S60. UV spectrum of 6.

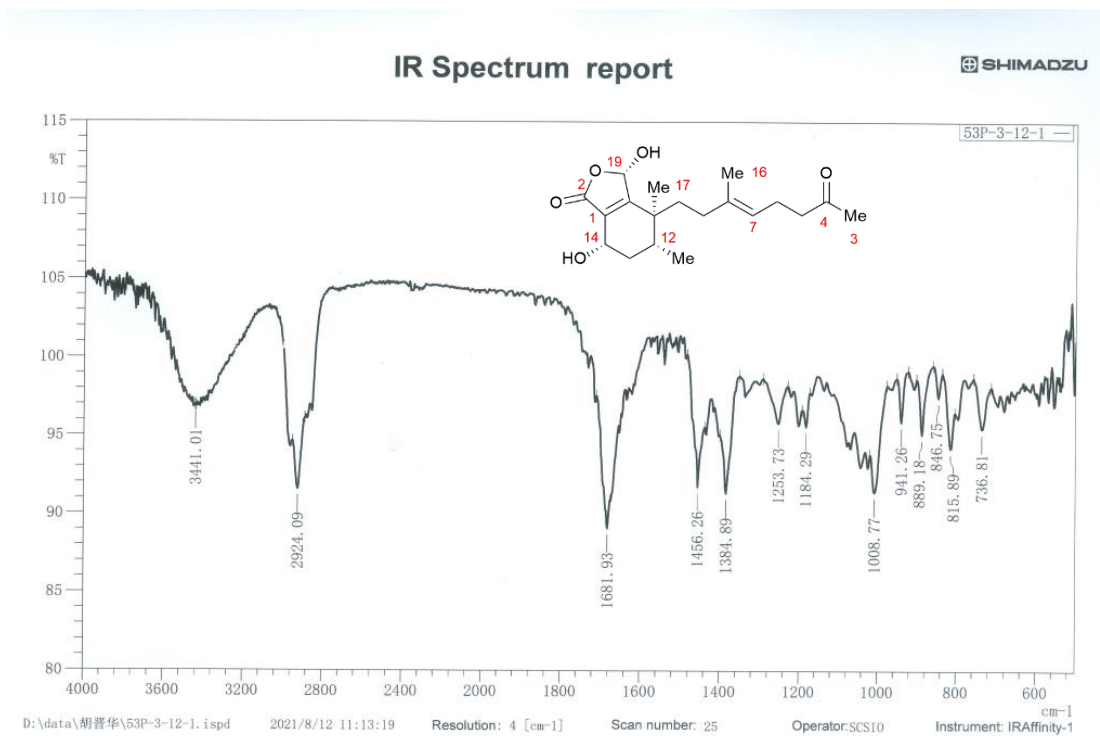

Figure S61. IR spectrum of 6.

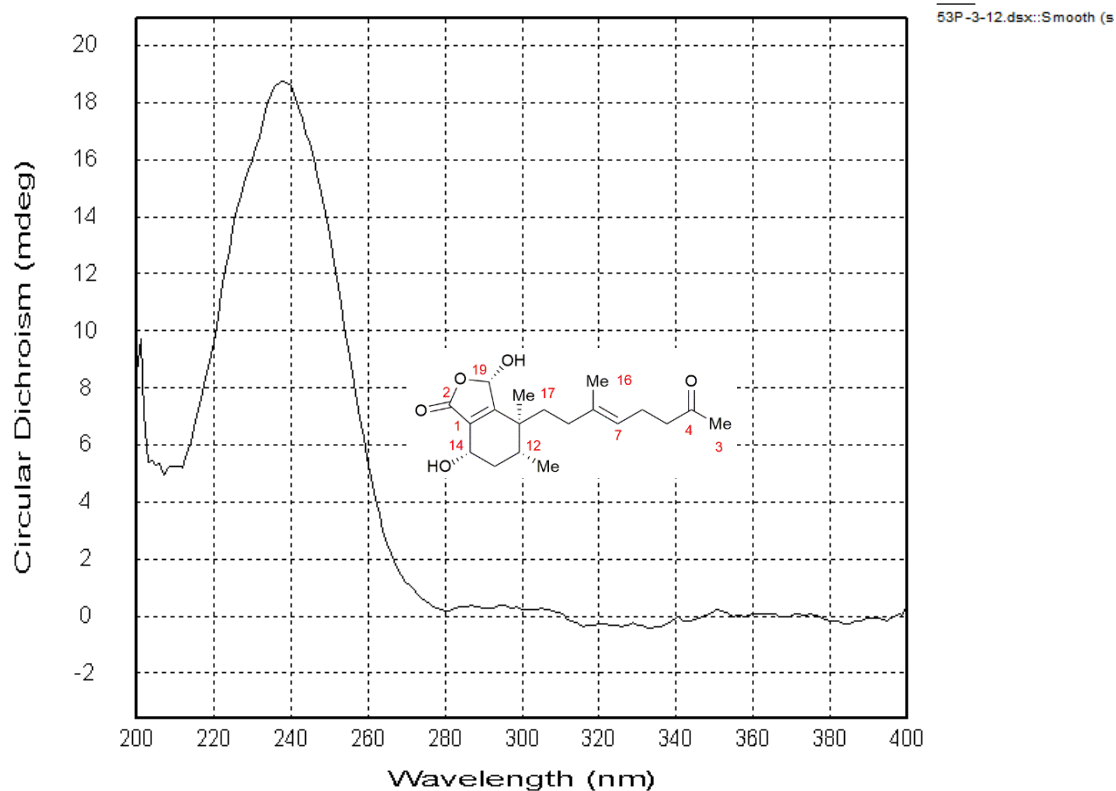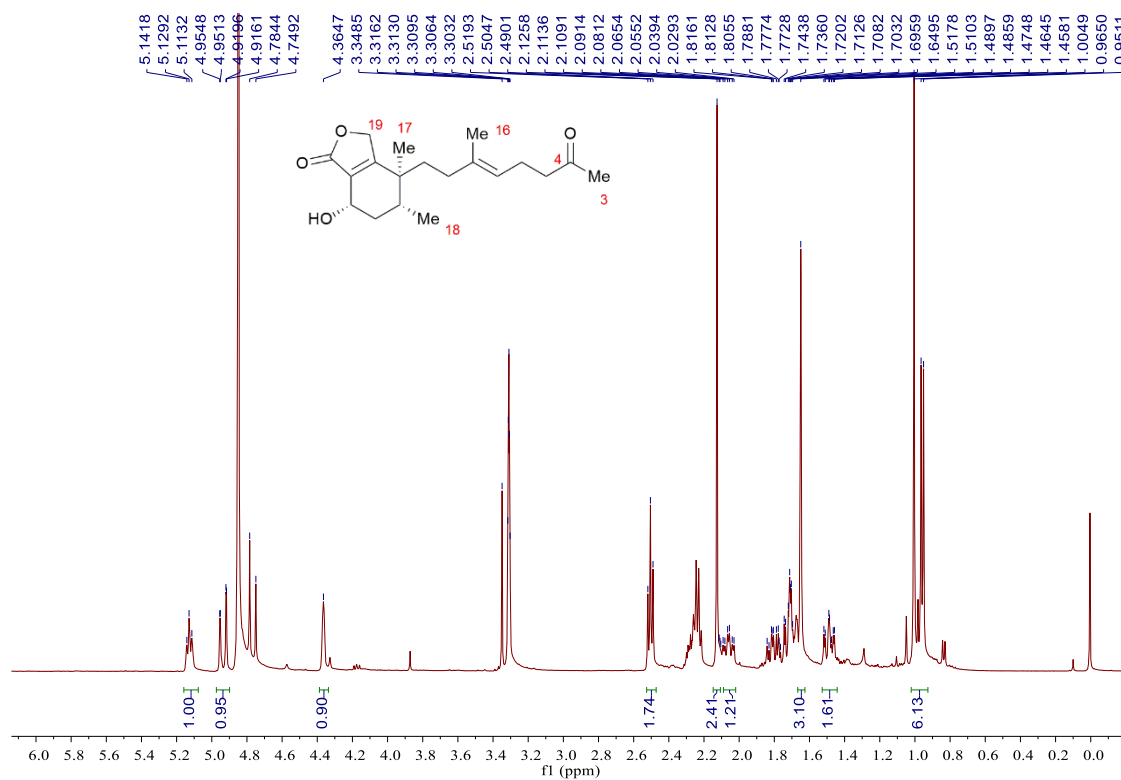

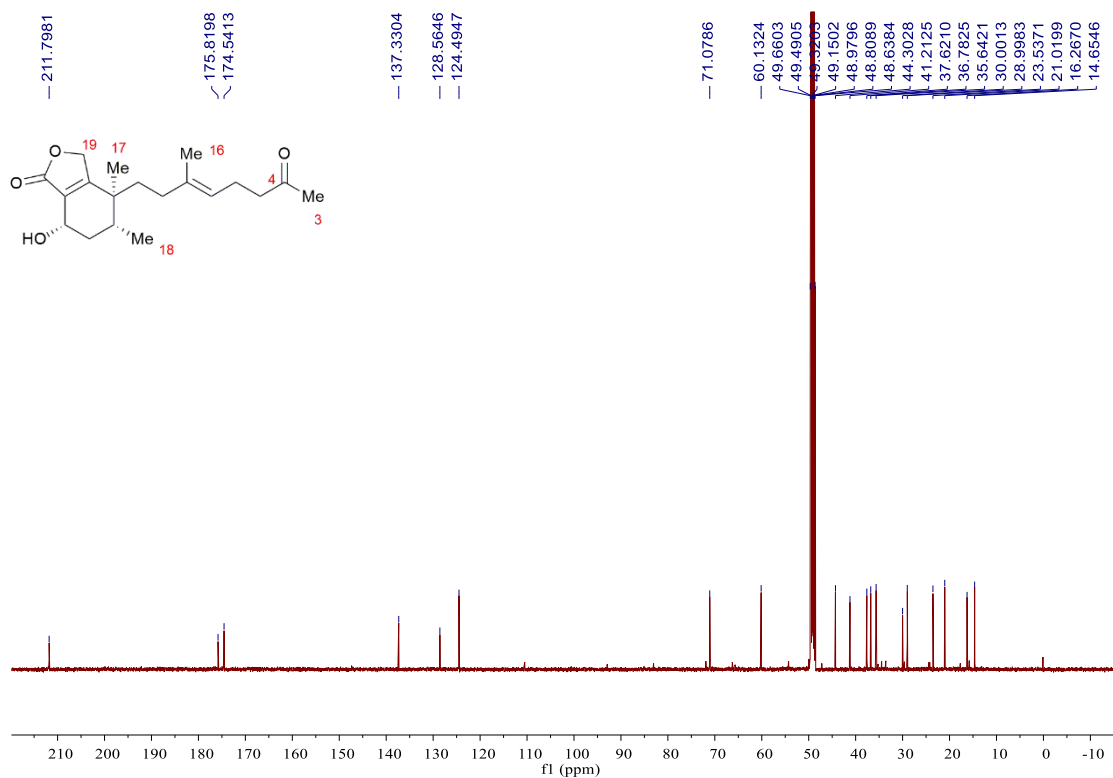

Figure S64.  $^{13}\text{C}$  NMR spectrum (125 MHz,  $\text{CD}_3\text{OD}$ ) of 7.

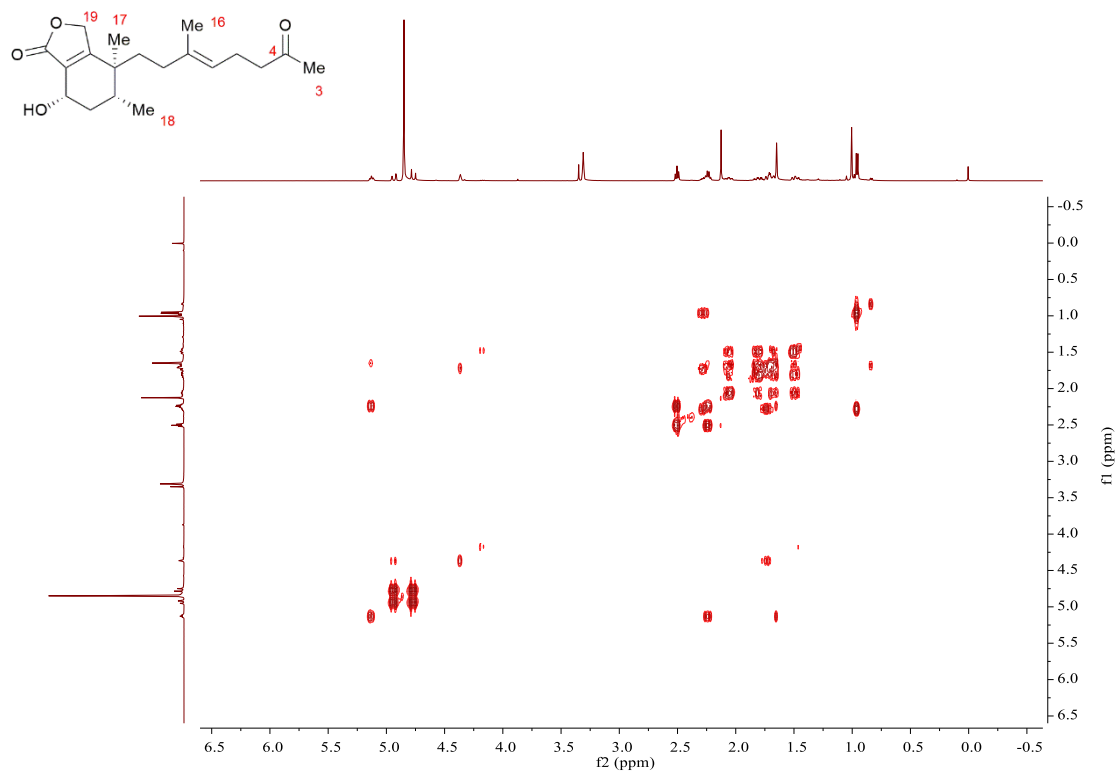

Figure S65.  $^1\text{H}$ - $^1\text{H}$  COSY spectrum of 7.

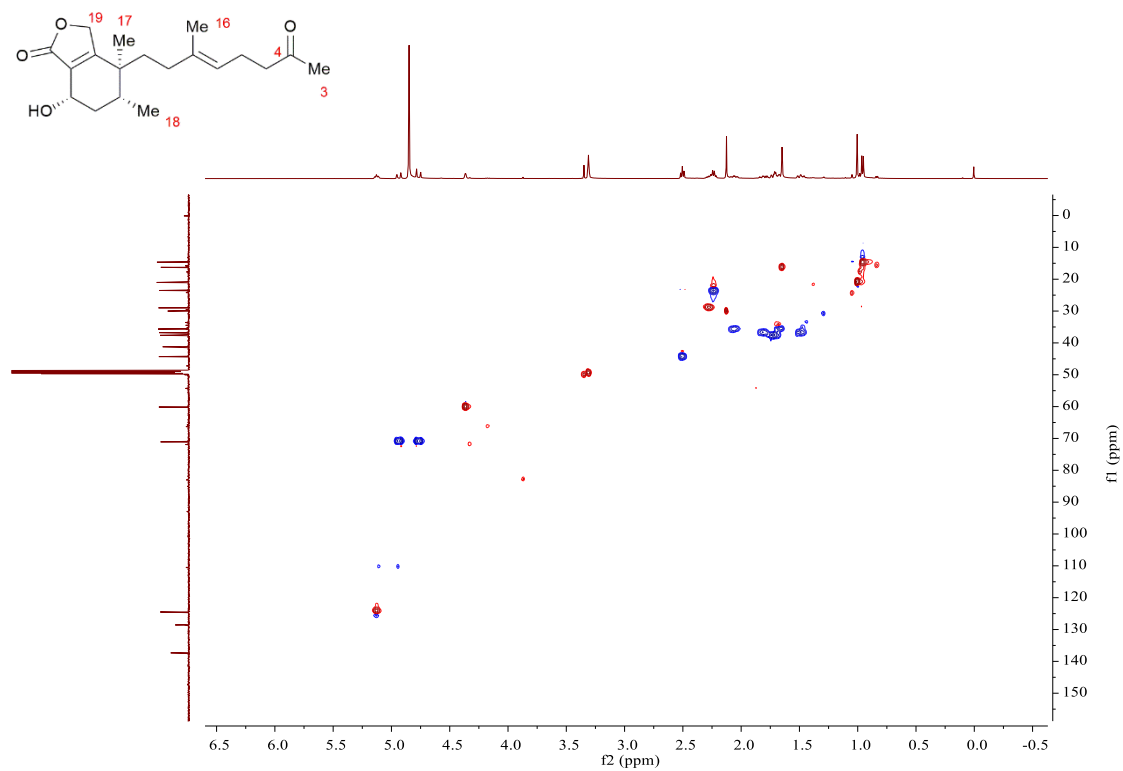

Figure S66. HSQC spectrum of 7.

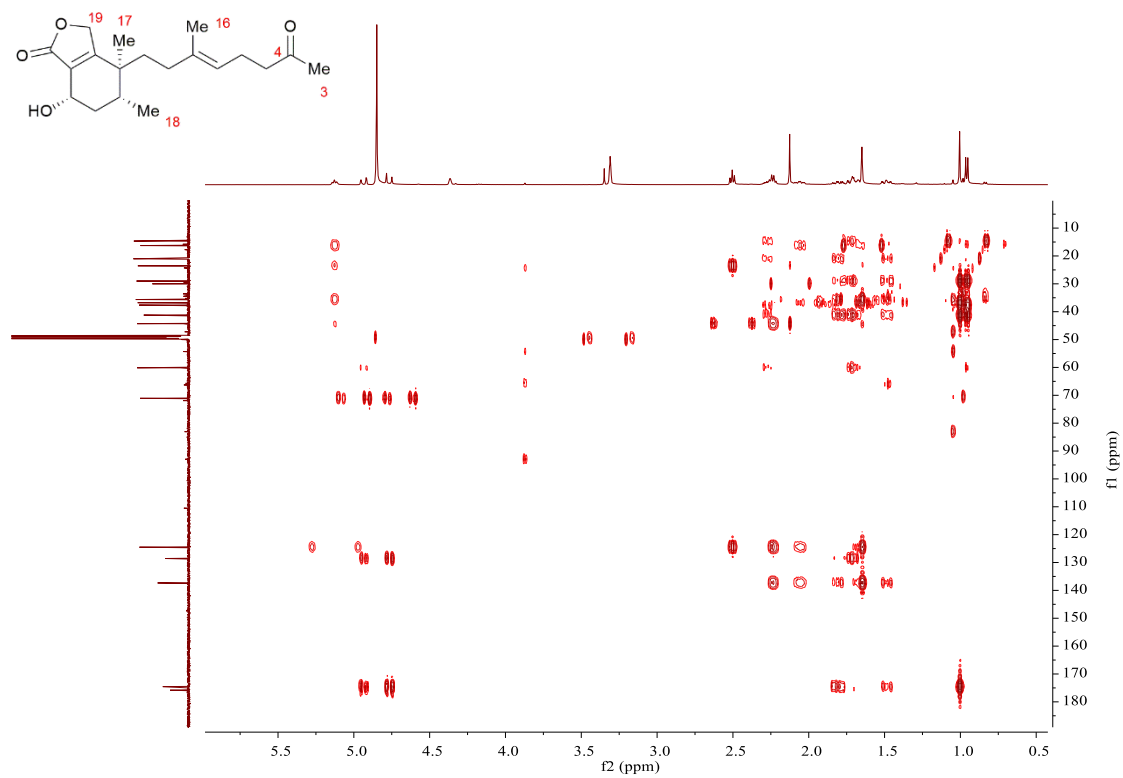

Figure S67. HMBC spectrum of 7.

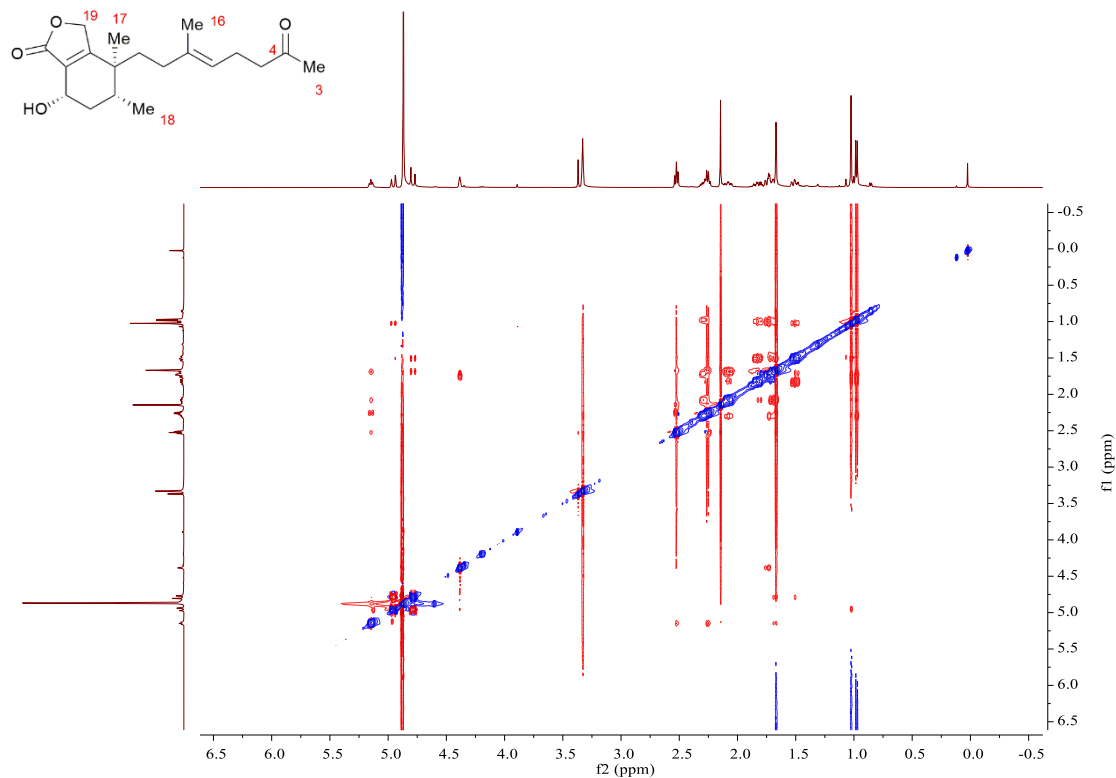

Figure S68. NOESY spectrum of 7.

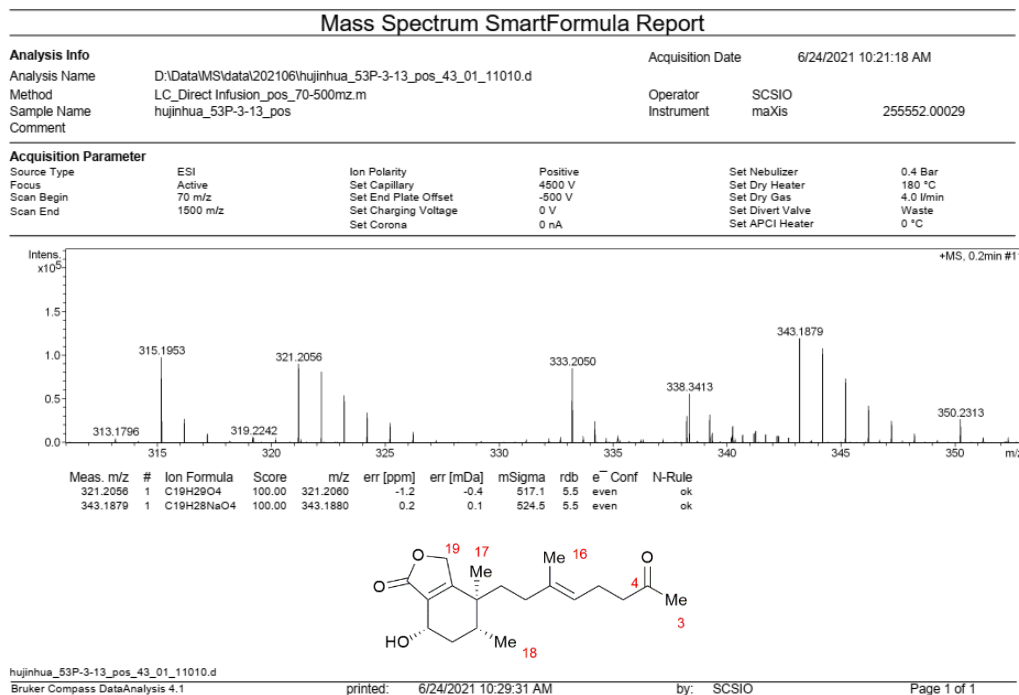

Figure S69. HRESIMS spectrum of 7.



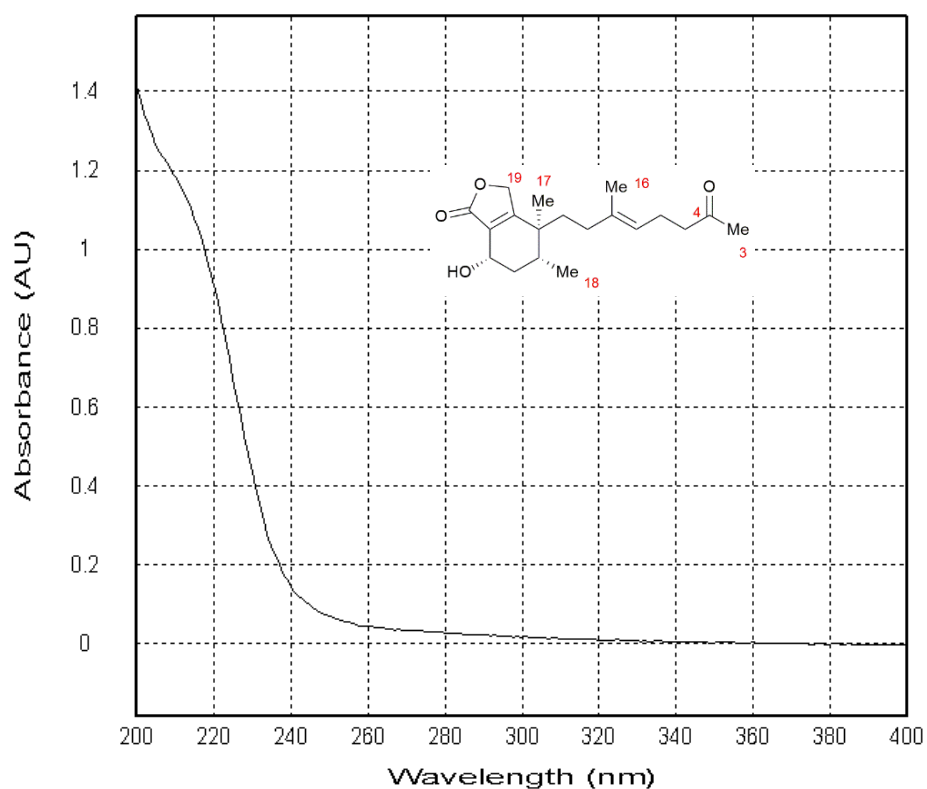

Figure S70. UV spectrum of 7.

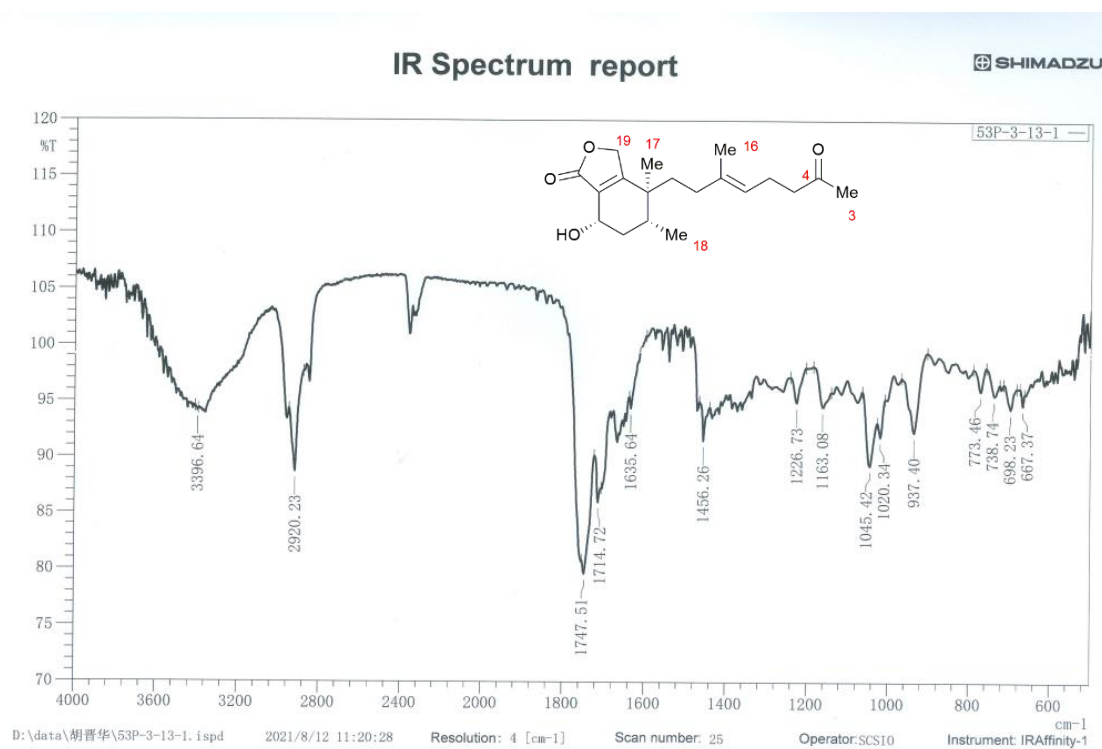

Figure S71. IR spectrum of 7.

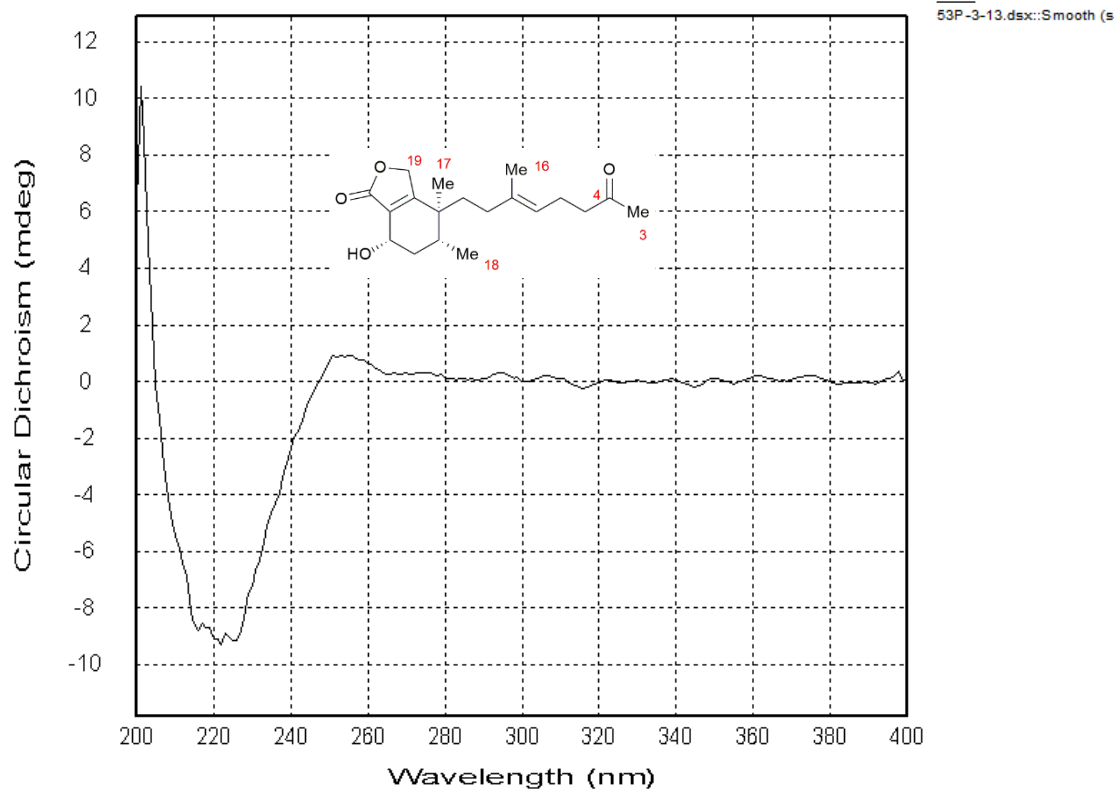

### The details of the ECD calculations of compounds 1-7.

The conformers of compounds 1-7 was generated by Confab with 50kcal/mol cutoff energy.<sup>1</sup> Gaussian09 software package was used to perform DFT calculations.<sup>2</sup> The optimization and frequency calculation of conformers were performed on B3LYP/SVP level of theory with IEF-PCM solvent model (MeOH). The population of each conformer was calculated by Boltzmann distribution based on Gibbs free energy. Theoretical ECD (TDDFT) of compounds 1-7 were calculated on mPW1PW91/SVP level with IEF-PCM solvent model (MeOH) as well. SpecDis v1.71 was used to simulate the ECD curve with sigma/gamma value 0.3 eV.<sup>3</sup> The calculated ECD curve of each conformer was Boltzmann averaged based on their Gibbs free energy. The averaged calculated ECD curves of 1-7 were adjusted by blue or red shifting for 0 ~ 15 nm.

[1] N. M. O'Boyle, T. Vandermeersch, C. J. Flynn, A. R. Maguire, G. R. Hutchison, *J. Cheminform.* **2011**, 3, 8.

[2] Gaussian 09, Revision A.02, M. J. Frisch, G. W. Trucks, H. B. Schlegel, G. E. Scuseria, M. A. Robb, J. R. Cheeseman, G. Scalmani, V. Barone, G. A. Petersson, H. Nakatsuji, X. Li, M. Caricato, A. Marenich, J. Bloino, B. G. Janesko, R. Gomperts, B. Mennucci, H. P. Hratchian, J. V. Ortiz, A. F. Izmaylov, J. L. Sonnenberg, D. Williams-Young, F. Ding, F. Lipparini, F. Egidi, J. Goings, B. Peng, A. Petrone, T. Henderson, D. Ranasinghe, V. G. Zakrzewski, J. Gao, N. Rega, G. Zheng, W. Liang, M. Hada, M. Ehara, K. Toyota, R. Fukuda, J. Hasegawa, M. Ishida, T. Nakajima, Y. Honda, O. Kitao, H. Nakai, T. Vreven, K. Throssell, J. A. Montgomery, Jr., J. E. Peralta, F. Ogliaro, M. Bearpark, J. J. Heyd, E. Brothers, K. N. Kudin, V. N. Staroverov, T. Keith, R. Kobayashi, J. Normand, K. Raghavachari, A. Rendell, J. C. Burant, S. S. Iyengar, J. Tomasi, M. Cossi, J. M. Millam, M. Klene, C. Adamo, R. Cammi, J. W. Ochterski, R. L. Martin, K. Morokuma, O. Farkas, J. B. Foresman, and D. J. Fox, Gaussian, Inc., Wallingford CT, 2016.

[3]. Bruhn, T.; Schaumlöffel, A.; Hemberger, Y.; Bringmann, G. *Chirality* **2013**, 25, 243–249.

Coordinates of the dominating conformers of **1**

1-c1,  $\Delta G = 0.0000$  kcal/mol, population = 87.09 %

O -0.928178 0.013382 -0.818941  
C 0.057206 0.785016 -1.480395  
H -0.389446 1.546137 -2.142052  
C 0.836355 1.435878 -0.380223  
C 1.929978 0.899873 0.191977  
C 2.402988 1.851232 1.255662  
H 2.487296 1.399099 2.254762  
H 3.372238 2.311714 1.005334  
O 1.398824 2.878199 1.306256  
C 0.439449 2.618894 0.385875  
O -0.578364 3.284218 0.310858  
C 2.537300 -0.434995 -0.154313  
C 3.985110 -0.199280 -0.639331  
H 4.003395 0.349794 -1.592891  
H 4.509503 -1.154662 -0.780704  
H 4.557762 0.382641 0.098358  
C 2.585732 -1.327207 1.127675  
H 3.459216 -1.013608 1.723303  
H 2.810228 -2.355971 0.803780  
C 1.377193 -1.332704 2.093611  
H 1.218510 -0.317062 2.484819  
H 1.699032 -1.939224 2.960997  
C 0.038986 -1.866795 1.619900  
C -1.020152 -1.042839 1.563471  
H -0.860556 0.006981 1.827506  
C -2.453695 -1.337501 1.160626  
H -2.711542 -2.354761 1.503436  
C -2.731121 -1.352391 -0.362747  
H -3.814238 -1.507417 -0.497513  
H -2.224504 -2.237168 -0.780953  
C -2.280658 -0.148031 -1.219630  
C -2.420805 -0.503030 -2.703440  
H -1.867895 -1.425334 -2.932286  
H -3.479043 -0.665473 -2.958814  
H -2.040916 0.302757 -3.349556  
C -3.064965 1.156620 -0.957271  
H -2.777831 1.901161 -1.720570  
H -4.140063 0.956156 -1.091289  
O -2.879497 1.702732 0.333454

H -2.063497 2.244406 0.334173  
O -3.341956 -0.470532 1.848731  
H -3.186674 0.423452 1.475594  
C -0.011289 -3.327636 1.253499  
H -1.038911 -3.692462 1.114632  
H 0.470791 -3.945773 2.030698  
H 0.534955 -3.528138 0.315196  
C 1.660734 -1.131858 -1.254851  
H 0.815535 -1.582488 -0.719262  
C 2.389991 -2.248933 -2.002271  
H 2.872356 -2.961795 -1.315982  
H 1.673261 -2.817199 -2.615261  
H 3.164630 -1.856586 -2.679186  
C 1.020062 -0.136666 -2.236063  
H 1.783877 0.470168 -2.751252  
H 0.468729 -0.689465 -3.010241

1-c7,  $\Delta G = 1.6780$  kcal/mol, population = 5.11 %

O -1.017005 -0.436660 -0.785320  
C -0.151734 0.342790 -1.598892  
H -0.712275 0.921462 -2.350892  
C 0.577269 1.261846 -0.667591  
C 1.740196 0.949533 -0.065785  
C 2.146587 2.118890 0.786183  
H 2.279443 1.869363 1.848839  
H 3.068400 2.602926 0.426702  
O 1.062445 3.052864 0.674217  
C 0.118742 2.556466 -0.159121  
O -0.922400 3.155180 -0.370580  
C 2.527825 -0.319977 -0.259690  
C 3.884777 0.094788 -0.879463  
H 4.427358 0.781437 -0.212395  
H 3.746033 0.600655 -1.847122  
H 4.525539 -0.783224 -1.035829  
C 2.819732 -0.978834 1.128638  
H 3.144206 -0.186862 1.822736  
H 3.704728 -1.623667 1.005664  
C 1.733705 -1.849255 1.802504  
H 2.159143 -2.141197 2.781430  
H 1.625019 -2.785321 1.234126  
C 0.355574 -1.250982 2.031669  
C -0.707918 -1.834491 1.454122  
H -0.506892 -2.730630 0.854633

C -2.186435 -1.496484 1.475485  
H -2.661370 -2.311138 2.061340  
C -2.835913 -1.629536 0.073461  
H -3.928754 -1.560278 0.194266  
H -2.627355 -2.653242 -0.276067  
C -2.396358 -0.651205 -1.050181  
C -2.616189 -1.309676 -2.416955  
H -2.305147 -0.647273 -3.239243  
H -2.037507 -2.242429 -2.483057  
H -3.679855 -1.552215 -2.564393  
C -3.174599 0.680973 -1.027312  
H -2.899643 1.275008 -1.915085  
H -4.249686 0.452530 -1.116073  
O -2.967181 1.448807 0.141715  
H -2.275923 2.117992 -0.048345  
O -2.532450 -0.300114 2.134216  
H -2.576011 0.417905 1.465492  
C 0.291209 -0.019145 2.906763  
H 1.172296 0.041312 3.565987  
H -0.618426 -0.004160 3.517094  
H 0.266405 0.904464 2.306821  
C 1.728047 -1.291288 -1.194283  
H 0.984738 -1.779230 -0.555361  
C 2.590231 -2.392103 -1.812109  
H 3.275953 -2.001809 -2.580233  
H 3.195204 -2.912429 -1.053196  
H 1.947824 -3.144581 -2.295652  
C 0.895241 -0.560204 -2.261894  
H 1.533164 0.048299 -2.925630  
H 0.384799 -1.302592 -2.893520

1-c2,  $\Delta G = 1.8957$  kcal/mol, population = 3.54 %

O -1.034096 -0.464947 0.509946  
C -0.004810 -1.118865 1.237291  
H -0.388043 -2.008183 1.766081  
C 0.959966 -1.517665 0.168133  
C 2.003244 -0.771825 -0.235001  
C 2.652831 -1.483650 -1.389938  
H 2.698196 -0.878882 -2.308407  
H 3.672352 -1.830738 -1.157844  
O 1.818828 -2.626769 -1.640155  
C 0.787494 -2.639039 -0.758864  
O -0.103280 -3.464584 -0.816323

C 2.432706 0.541422 0.368410  
C 3.829700 0.334417 0.998796  
H 4.243162 1.289806 1.350641  
H 4.536947 -0.078925 0.264356  
H 3.783303 -0.357999 1.852739  
C 2.562212 1.621949 -0.749607  
H 3.469177 1.396447 -1.335170  
H 2.772589 2.583125 -0.254588  
C 1.406537 1.800604 -1.762980  
H 1.260745 0.864738 -2.323762  
H 1.762396 2.546167 -2.497763  
C 0.066138 2.249875 -1.218050  
C -0.999879 1.435775 -1.309501  
H -0.862067 0.475262 -1.814568  
C -2.369224 1.655119 -0.710721  
H -2.283972 2.305999 0.172612  
C -3.055663 0.338909 -0.299743  
H -3.073603 -0.332607 -1.173629  
H -4.100377 0.573201 -0.043855  
C -2.416829 -0.441422 0.864888  
C -2.649602 0.239774 2.214657  
H -2.202959 -0.340811 3.036128  
H -2.207464 1.246260 2.226344  
H -3.727275 0.332521 2.417601  
C -2.977515 -1.879776 0.905098  
H -2.548397 -2.405340 1.780945  
H -4.064108 -1.817119 1.081297  
O -2.779105 -2.603028 -0.281941  
H -1.833754 -2.830296 -0.372404  
O -3.229462 2.380220 -1.602095  
H -3.230573 1.904001 -2.445173  
C 0.028497 3.619113 -0.590212  
H -0.979423 3.907825 -0.265722  
H 0.375003 4.374449 -1.316948  
H 0.704010 3.695111 0.277809  
C 1.376642 0.989593 1.441466  
H 0.554061 1.441239 0.876729  
C 1.907266 2.037670 2.421178  
H 1.074234 2.457629 3.006000  
H 2.627340 1.607400 3.134585  
H 2.404012 2.875735 1.908949  
C 0.734505 -0.183197 2.198821  
H 1.493465 -0.770351 2.744324  
H 0.038952 0.211175 2.952200

1-c3,  $\Delta G = 2.0055$  kcal/mol, population = 2.94 %

O -0.934848 -0.061958 -0.926782  
C -0.067005 0.991864 -1.313284  
H -0.613977 1.807197 -1.807383  
C 0.652472 1.496188 -0.091532  
C 1.799894 0.960366 0.370862  
C 2.227002 1.743360 1.579133  
H 2.328634 1.135825 2.491084  
H 3.175965 2.279590 1.419178  
O 1.184673 2.706286 1.783613  
C 0.244906 2.575446 0.817920  
O -0.742665 3.288231 0.802906  
C 2.544600 -0.200282 -0.237978  
C 3.946891 0.301434 -0.654028  
H 4.570318 -0.534660 -0.999971  
H 4.468087 0.768324 0.194656  
H 3.883712 1.043621 -1.464159  
C 2.727453 -1.330907 0.824057  
H 3.587145 -1.063144 1.460693  
H 3.036645 -2.242117 0.287871  
C 1.560418 -1.654406 1.783489  
H 1.321798 -0.761972 2.380054  
H 1.961762 -2.393967 2.501212  
C 0.266170 -2.209977 1.224130  
C -0.863378 -1.490329 1.329885  
H -0.787390 -0.491161 1.770384  
C -2.271637 -1.858133 0.924454  
H -2.380843 -2.958905 0.970178  
C -2.711889 -1.460608 -0.495833  
H -3.801780 -1.612148 -0.551433  
H -2.251504 -2.173725 -1.197167  
C -2.358804 -0.052570 -1.009628  
C -2.810407 0.093098 -2.465958  
H -2.333220 -0.677462 -3.089751  
H -3.902993 -0.018467 -2.544956  
H -2.547792 1.085673 -2.855240  
C -2.988129 1.056914 -0.144733  
H -4.069795 0.847050 -0.067651  
H -2.581320 0.991807 0.876144  
O -2.814042 2.348184 -0.690190  
H -2.084816 2.780580 -0.202485  
O -3.201189 -1.261324 1.834232

H -2.892439 -1.448382 2.731698  
C 0.343487 -3.572404 0.587861  
H 0.874142 -4.284399 1.243236  
H 0.912917 -3.535977 -0.357017  
H -0.646489 -3.987966 0.353994  
C 1.741999 -0.740445 -1.472572  
H 0.953734 -1.382972 -1.060608  
C 2.581880 -1.587636 -2.429580  
H 3.145998 -2.373156 -1.903589  
H 1.925110 -2.086801 -3.158907  
H 3.302324 -0.978791 -2.997471  
C 0.993306 0.370754 -2.227749  
H 1.685584 1.150383 -2.588224  
H 0.492193 -0.058480 -3.108674

1-c19,  $\Delta G = 2.9022$  kcal/mol, population = 0.65 %

O -1.034296 0.449443 -0.506717  
C -0.013192 1.118910 -1.231717  
H -0.407287 2.005762 -1.756513  
C 0.947413 1.524984 -0.161807  
C 1.999167 0.789466 0.237909  
C 2.641803 1.504593 1.394672  
H 2.693846 0.897407 2.311204  
H 3.657504 1.863153 1.163282  
O 1.795851 2.638156 1.648720  
C 0.763706 2.641854 0.768315  
O -0.135734 3.457759 0.828227  
C 2.441208 -0.517776 -0.369346  
C 3.836985 -0.296748 -0.997383  
H 3.785325 0.396660 -1.850224  
H 4.259906 -1.247647 -1.350137  
H 4.539369 0.121963 -0.261318  
C 2.577938 -1.599751 0.746082  
H 3.481679 -1.367557 1.334058  
H 2.797777 -2.557978 0.249383  
C 1.421731 -1.789631 1.756526  
H 1.267676 -0.856293 2.319310  
H 1.782294 -2.533737 2.490507  
C 0.084466 -2.249180 1.211294  
C -0.989436 -1.448911 1.318381  
H -0.864025 -0.495589 1.838876  
C -2.357353 -1.678440 0.726898  
H -2.263700 -2.335283 -0.157493

C -3.048890 -0.367741 0.304604  
H -3.076789 0.300485 1.178550  
H -4.094146 -0.597715 0.036682  
C -2.415434 0.411440 -0.863440  
C -2.639727 -0.276593 -2.211547  
H -3.716103 -0.383052 -2.414931  
H -2.200205 0.307348 -3.034458  
H -2.185346 -1.277588 -2.219687  
C -2.990700 1.844115 -0.909559  
H -2.565618 2.369963 -1.787198  
H -4.076332 1.770164 -1.087336  
O -2.801761 2.573925 0.274746  
H -1.858323 2.807236 0.369678  
O -3.155246 -2.333606 1.721707  
H -4.042190 -2.450924 1.351990  
C 0.062433 -3.613774 0.571852  
H 0.425347 -4.369761 1.289819  
H 0.732196 -3.672864 -0.301812  
H -0.943282 -3.914948 0.251433  
C 1.390187 -0.972689 -1.444236  
H 0.571946 -1.433913 -0.880975  
C 1.931541 -2.012007 -2.427391  
H 2.646949 -1.571758 -3.139414  
H 2.437202 -2.846569 -1.918156  
H 1.102908 -2.438705 -3.013593  
C 0.736533 0.196114 -2.197456  
H 1.489484 0.793912 -2.739722  
H 0.045769 -0.202296 -2.953096

1-c15,  $\Delta G = 3.2392$  kcal/mol, population = 0.37 %

O -0.820734 -0.137048 -1.238301  
C 0.131558 0.867960 -1.557435  
H -0.312283 1.662549 -2.180196  
C 0.761681 1.463383 -0.326026  
C 1.821278 0.918086 0.303590  
C 2.199712 1.819001 1.445777  
H 2.121646 1.331712 2.430642  
H 3.220908 2.220062 1.346991  
O 1.272133 2.905890 1.389042  
C 0.428767 2.743621 0.326855  
O -0.397836 3.577857 0.040202  
C 2.569445 -0.321807 -0.125662  
C 4.012968 0.108807 -0.482461

H 4.028923 0.777089 -1.356504  
H 4.631486 -0.770567 -0.709273  
H 4.490371 0.635283 0.356648  
C 2.653759 -1.353067 1.039865  
H 3.477581 -1.045389 1.704745  
H 2.972765 -2.316288 0.611471  
C 1.422769 -1.560484 1.945643  
H 1.189408 -0.617496 2.460985  
H 1.744579 -2.262857 2.736662  
C 0.143602 -2.101503 1.342482  
C -0.956682 -1.331021 1.339976  
H -0.855823 -0.311559 1.724812  
C -2.349603 -1.670226 0.874432  
H -2.508487 -2.760002 0.959097  
C -2.707400 -1.293484 -0.572515  
H -3.801817 -1.365977 -0.664797  
H -2.276275 -2.054207 -1.240230  
C -2.227549 0.069459 -1.107621  
C -2.861465 0.337666 -2.474551  
H -2.731615 -0.525272 -3.145259  
H -3.935970 0.537978 -2.352752  
H -2.405910 1.220448 -2.949498  
C -2.559646 1.227781 -0.140405  
H -1.889619 1.168961 0.732718  
H -2.350368 2.188927 -0.631905  
O -3.913544 1.222080 0.253913  
H -3.980789 0.490855 0.898533  
O -3.314018 -1.011723 1.719862  
H -3.027982 -1.093914 2.640765  
C 0.196288 -3.506428 0.805347  
H 0.617089 -4.196367 1.556750  
H 0.856853 -3.566860 -0.075981  
H -0.789407 -3.883285 0.500286  
C 1.851661 -0.947981 -1.371144  
H 0.995588 -1.510286 -0.978059  
C 2.725405 -1.921187 -2.164491  
H 2.108037 -2.461894 -2.898514  
H 3.520301 -1.401764 -2.721748  
H 3.203833 -2.674373 -1.519653  
C 1.242814 0.119954 -2.298512  
H 2.010013 0.830779 -2.647505  
H 0.810998 -0.367482 -3.185560

1-c5,  $\Delta G = 3.6145$  kcal/mol, population = 0.19 %

O 1.126342 -0.166062 -0.510448  
C 0.253211 -1.101002 -1.139183  
H 0.815052 -1.925516 -1.596423  
C -0.660200 -1.596294 -0.059665  
C -1.811624 -0.989379 0.286925  
C -2.389677 -1.732328 1.458207  
H -2.504183 -1.106323 2.356801  
H -3.364134 -2.195135 1.236425  
O -1.442639 -2.772740 1.743714  
C -0.410586 -2.703658 0.869504  
O 0.524368 -3.482563 0.926906  
C -2.435700 0.191525 -0.413639  
C -3.757486 -0.302337 -1.051204  
H -4.409174 -0.773191 -0.300715  
H -3.566481 -1.039772 -1.845059  
H -4.314101 0.539110 -1.486522  
C -2.793575 1.309439 0.613761  
H -3.671243 0.969456 1.188417  
H -3.144392 2.182115 0.040506  
C -1.730138 1.761133 1.643846  
H -1.449918 0.908208 2.281139  
H -2.235601 2.489127 2.304242  
C -0.470313 2.381351 1.081377  
C 0.703794 1.738575 1.199894  
H 0.715636 0.800798 1.761426  
C 1.995357 2.108268 0.502407  
H 1.765906 2.430456 -0.525921  
C 2.977684 0.925283 0.437080  
H 3.122675 0.559664 1.469163  
H 3.949866 1.314668 0.102042  
C 2.551319 -0.256116 -0.476777  
C 3.114661 -0.118451 -1.891298  
H 2.789630 0.832286 -2.340579  
H 4.215127 -0.140860 -1.877305  
H 2.769429 -0.945774 -2.528093  
C 3.031328 -1.557716 0.196174  
H 4.125160 -1.471915 0.333539  
H 2.579579 -1.600787 1.203066  
O 2.751381 -2.735412 -0.526058  
H 1.968277 -3.141317 -0.103161  
O 2.636116 3.243751 1.098466  
H 2.644685 3.097911 2.055308  
C -0.619820 3.692555 0.352091  
H -1.138141 3.573956 -0.614558

H 0.352200 4.168312 0.170536  
H -1.231986 4.390956 0.947820  
C -1.449190 0.732675 -1.510472  
H -0.725707 1.359030 -0.979357  
C -2.127194 1.602694 -2.570744  
H -2.769639 2.377757 -2.125813  
H -1.362810 2.115821 -3.174768  
H -2.746840 1.008805 -3.260691  
C -0.605979 -0.369705 -2.171140  
H -1.244576 -1.103324 -2.692967  
H 0.052612 0.083367 -2.928034

l-c9,  $\Delta G = 3.9326$  kcal/mol, population = 0.11 %

O 1.150478 0.219487 -0.553537  
C 0.423974 -0.734661 -1.330609  
H 1.109482 -1.426086 -1.837384  
C -0.395773 -1.441054 -0.304273  
C -1.634747 -1.070326 0.066586  
C -2.066234 -1.987047 1.179266  
H -2.363010 -1.462364 2.098652  
H -2.892363 -2.651905 0.880397  
O -0.909900 -2.790983 1.469614  
C 0.094892 -2.467633 0.617419  
O 1.199342 -2.972973 0.698966  
C -2.457549 0.022357 -0.573304  
C -3.655831 -0.683692 -1.254196  
H -3.316913 -1.398666 -2.019012  
H -4.320135 0.048859 -1.732244  
H -4.254526 -1.236640 -0.514544  
C -3.029711 0.992964 0.513385  
H -3.379639 0.393517 1.369297  
H -3.943026 1.447320 0.098055  
C -2.152430 2.162151 1.021884  
H -2.761826 2.683347 1.783006  
H -2.006042 2.884923 0.205501  
C -0.806994 1.811854 1.629055  
C 0.320080 2.238553 1.030784  
H 0.203673 2.872189 0.145323  
C 1.766683 1.921182 1.360256  
H 2.167160 2.734317 1.993637  
C 2.664766 1.879684 0.092850  
H 3.717845 1.967969 0.404015  
H 2.441830 2.771176 -0.514298



C 2.510217 0.607724 -0.780010  
C 2.781911 0.906885 -2.252516  
H 2.057239 1.637378 -2.640632  
H 3.791728 1.329790 -2.366383  
H 2.730943 -0.009086 -2.858760  
C 3.461923 -0.501120 -0.267326  
H 4.496389 -0.186573 -0.490701  
H 3.371912 -0.560908 0.828602  
O 3.244027 -1.759263 -0.868651  
H 2.572491 -2.234439 -0.341269  
O 1.908589 0.738347 2.135826  
H 1.464481 0.051268 1.615197  
C -0.855613 0.971311 2.887233  
H -0.038559 1.212451 3.577131  
H -0.767034 -0.106012 2.673456  
H -1.814991 1.116801 3.408908  
C -1.571495 0.803014 -1.603693  
H -0.967493 1.496798 -1.011909  
C -2.382526 1.635483 -2.597406  
H -1.713410 2.310647 -3.153436  
H -2.903395 1.007623 -3.337023  
H -3.137342 2.260339 -2.095012  
C -0.539137 -0.076504 -2.323362  
H -1.027882 -0.874470 -2.908944  
H 0.025597 0.539573 -3.037785

Coordinates of the dominating  
conformers of **2**

2-c2,  $\Delta G = 0.0000$  kcal/mol, population = 40.09 %

O -1.416418 0.205634 -0.318966  
C -0.512576 0.733107 -1.277428  
C 0.571702 1.294138 -0.414522  
C 1.682072 0.632962 -0.056150  
C 2.459318 1.510123 0.914345  
O 3.714862 1.907524 0.502827  
H 3.666942 2.214196 -0.416474  
H 2.583937 1.042268 1.901327  
O 1.595758 2.663408 1.114904  
C 0.466148 2.527066 0.380890  
O -0.452567 3.316399 0.447186  
C 2.069989 -0.752472 -0.512701

C 3.359125 -0.648319 -1.361631  
H 4.150339 -0.128234 -0.806000  
H 3.731854 -1.649165 -1.620460  
H 3.176681 -0.096839 -2.296694  
C 2.384100 -1.641667 0.729780  
H 3.349417 -1.308609 1.146684  
H 2.569071 -2.662696 0.360446  
C 1.376380 -1.687489 1.903813  
C -0.014756 -2.218570 1.617229  
C -1.080981 -1.411704 1.758442  
C -2.523829 -1.692766 1.423107  
H -2.602851 -2.539433 0.723023  
H -3.057943 -2.016590 2.336595  
C -3.288087 -0.471838 0.874592  
H -4.360924 -0.714300 0.805339  
H -3.195842 0.360915 1.588953  
C -2.828174 0.066686 -0.494134  
C -3.172960 -0.887489 -1.638212  
H -4.257364 -1.073363 -1.668666  
H -2.660224 -1.851180 -1.508719  
H -2.878319 -0.468729 -2.612387  
C -3.461487 1.448905 -0.759223  
H -4.556096 1.324194 -0.796280  
H -3.152449 1.794508 -1.766010  
O -3.177287 2.407299 0.227713  
H -2.224835 2.618997 0.212618  
H -0.887186 -0.393931 2.112400  
C -0.094048 -3.660540 1.185106  
H -1.113823 -3.968639 0.918119  
H 0.557449 -3.868288 0.320730  
H 0.253964 -4.322720 1.998127  
H 1.850881 -2.317612 2.679362  
H 1.280660 -0.684567 2.347941  
C 0.887501 -1.370296 -1.343443  
H 0.163097 -1.731287 -0.605471  
C 1.304208 -2.556368 -2.214895  
H 0.408311 -3.066104 -2.602240  
H 1.889828 -3.301907 -1.656108  
H 1.904572 -2.239995 -3.081958  
C 0.120184 -0.333383 -2.176306  
H -0.654686 -0.841991 -2.765328  
H 0.785546 0.171041 -2.898455  
H -0.981565 1.529632 -1.880227

2-c1,  $\Delta G = 0.5371$  kcal/mol, population = 16.17 %

O -1.460681 0.515362 0.563419  
C -0.698718 -0.383680 1.360651  
C 0.254945 -1.120304 0.455993  
C 1.481078 -0.666301 0.135491  
C 2.127939 -1.656733 -0.821460  
O 3.311884 -2.235529 -0.413500  
H 3.219496 -2.544727 0.501316  
H 2.317479 -1.218754 -1.810155  
O 1.112073 -2.672792 -1.009455  
C 0.021810 -2.386500 -0.265104  
O -0.942788 -3.126081 -0.260614  
C 2.135422 0.588791 0.666375  
C 3.347362 0.157213 1.530711  
H 3.853187 1.040937 1.942001  
H 3.034114 -0.480137 2.372175  
H 4.078550 -0.397752 0.929814  
C 2.687726 1.443230 -0.519407  
H 3.218791 0.768728 -1.210435  
H 3.473333 2.100909 -0.114227  
C 1.720103 2.349813 -1.313174  
C 0.474384 1.717137 -1.898474  
C -0.739690 2.122750 -1.492927  
C -2.079948 1.579944 -1.907833  
H -2.510098 2.235865 -2.688613  
H -1.970730 0.591558 -2.380616  
C -3.099972 1.520051 -0.752313  
H -3.092418 2.492098 -0.230972  
H -4.116246 1.396766 -1.159017  
C -2.860352 0.411601 0.295622  
C -3.661233 0.686580 1.569707  
H -4.738090 0.747120 1.346784  
H -3.340306 1.639521 2.016074  
H -3.515388 -0.120782 2.300620  
C -3.262382 -0.953537 -0.295784  
H -2.616896 -1.172342 -1.163627  
H -4.295042 -0.852265 -0.676140  
O -3.224542 -2.010729 0.637193  
H -2.432574 -2.543619 0.427190  
H -0.784206 2.926909 -0.749000  
C 0.650070 0.633288 -2.940637  
H 0.124132 0.882665 -3.876383  
H 1.708996 0.483215 -3.198421

H 0.243894 -0.335538 -2.604113  
H 1.418019 3.194188 -0.675305  
H 2.323199 2.789268 -2.129748  
C 1.090062 1.383974 1.517256  
H 0.436020 1.890457 0.800422  
C 1.710729 2.459890 2.408624  
H 0.919830 3.109556 2.814983  
H 2.410868 3.102320 1.851937  
H 2.254878 2.031199 3.264604  
C 0.150444 0.462224 2.314522  
H -0.522708 1.074331 2.933769  
H 0.712936 -0.199053 2.995487  
H -1.345950 -1.086623 1.902992

2-c3,  $\Delta G = 0.7511$  kcal/mol, population = 11.27 %

O -1.462139 -0.518267 -0.581636  
C -0.700600 0.381483 -1.379558  
C 0.247709 1.124872 -0.475016  
C 1.472657 0.673729 -0.146183  
C 2.098939 1.654282 0.827896  
O 3.264194 2.210816 0.345205  
H 3.731023 2.647407 1.072919  
H 2.239697 1.210754 1.824969  
O 1.085135 2.677324 0.999332  
C 0.009134 2.395661 0.234453  
O -0.952378 3.139947 0.209266  
C 2.132441 -0.579324 -0.673356  
C 3.336309 -0.140065 -1.544859  
H 3.857117 -1.022064 -1.941686  
H 3.006658 0.478628 -2.393263  
H 4.050074 0.448753 -0.957510  
C 2.690024 -1.427590 0.513779  
H 3.218066 -0.748590 1.202990  
H 3.479022 -2.082049 0.109997  
C 1.727230 -2.338651 1.309660  
C 0.477239 -1.713401 1.894231  
C -0.734837 -2.117495 1.481042  
C -2.076502 -1.577628 1.895804  
H -2.504865 -2.233318 2.677817  
H -1.969236 -0.588451 2.367550  
C -3.097409 -1.520694 0.741105  
H -3.089096 -2.493721 0.221573  
H -4.113487 -1.398103 1.148557

C -2.860673 -0.414094 -0.309731  
C -3.665104 -0.692791 -1.580818  
H -3.520150 0.112050 -2.314642  
H -4.741545 -0.751683 -1.355329  
H -3.345862 -1.647447 -2.024689  
C -3.261945 0.952720 0.278757  
H -2.611147 1.176827 1.141380  
H -4.291637 0.850362 0.666892  
O -3.234024 2.005904 -0.658861  
H -2.440307 2.541021 -0.459959  
H -0.776392 -2.916340 0.731386  
C 0.644751 -0.639622 2.948041  
H 0.224748 0.327861 2.624758  
H 0.126376 -0.907048 3.883205  
H 1.702907 -0.479940 3.202930  
H 1.430554 -3.185458 0.672537  
H 2.332450 -2.773865 2.126927  
C 1.091089 -1.382795 -1.521710  
H 0.435943 -1.887462 -0.804823  
C 1.717498 -2.461135 -2.406125  
H 2.418327 -3.098521 -1.844514  
H 2.262712 -2.034720 -3.262463  
H 0.929781 -3.115336 -2.811587  
C 0.152265 -0.467329 -2.326955  
H -0.518107 -1.083829 -2.944972  
H 0.716214 0.191226 -3.009158  
H -1.348909 1.079796 -1.926739

2-c8,  $\Delta G = 0.7624$  kcal/mol, population = 11.05 %

O -1.363014 -0.051954 0.386504  
C -0.501098 -0.754829 1.262180  
C 0.554806 -1.306934 0.355455  
C 1.686574 -0.661499 0.031712  
C 2.452981 -1.520284 -0.962925  
O 3.683384 -1.980590 -0.541047  
H 3.605661 -2.313091 0.367156  
H 2.617677 -1.019071 -1.926914  
O 1.553291 -2.632269 -1.230245  
C 0.423636 -2.498325 -0.498622  
O -0.513591 -3.262127 -0.614166  
C 2.102539 0.697716 0.542723  
C 3.406258 0.547301 1.360766  
H 3.236311 -0.037991 2.277580

H 4.180787 0.040044 0.770875  
H 3.794714 1.533615 1.650673  
C 2.396083 1.639849 -0.666431  
H 3.383635 1.365478 -1.073639  
H 2.523102 2.657524 -0.264589  
C 1.416937 1.668049 -1.863616  
C -0.006666 2.145520 -1.649868  
C -1.027649 1.292356 -1.845202  
C -2.509915 1.537089 -1.687838  
H -2.759435 2.568904 -1.985489  
H -3.044426 0.885795 -2.399011  
C -3.104085 1.330419 -0.272144  
H -2.728394 2.132495 0.384171  
H -4.198600 1.453817 -0.328553  
C -2.788164 0.002120 0.442675  
C -3.321932 0.035502 1.874458  
H -3.114649 -0.908251 2.396557  
H -4.413303 0.176821 1.862291  
H -2.874470 0.866990 2.438180  
C -3.348100 -1.216491 -0.314240  
H -2.964662 -1.195171 -1.349507  
H -4.447416 -1.127904 -0.367085  
O -3.037651 -2.441284 0.314997  
H -2.159523 -2.738529 0.007208  
H -0.758733 0.267089 -2.115947  
C -0.176474 3.585702 -1.242005  
H 0.244230 3.775547 -0.239462  
H 0.362199 4.256463 -1.934409  
H -1.230746 3.894469 -1.217237  
H 1.891892 2.324794 -2.616560  
H 1.375465 0.670171 -2.325655  
C 0.943937 1.292818 1.420508  
H 0.207019 1.689820 0.711442  
C 1.386170 2.441415 2.328106  
H 1.957160 3.208981 1.783548  
H 2.008289 2.091329 3.166322  
H 0.501422 2.935447 2.759028  
C 0.185502 0.221838 2.220864  
H -0.571526 0.705896 2.855062  
H 0.861878 -0.334881 2.891986  
H -1.023643 -1.563413 1.794381

2-c12,  $\Delta G = 1.1458$  kcal/mol, population = 5.78 %

O 1.366711 0.059089 0.387978  
C 0.509962 0.750026 1.278753  
C -0.544146 1.318949 0.381138  
C -1.677884 0.682486 0.048329  
C -2.420860 1.542330 -0.957743  
O -3.625656 1.990736 -0.459531  
H -4.162674 2.334453 -1.188675  
H -2.539704 1.043748 -1.932941  
O -1.518800 2.658130 -1.205657  
C -0.401250 2.518663 -0.457741  
O 0.539416 3.281783 -0.554097  
C -2.102044 -0.677819 0.548390  
C -3.397138 -0.520254 1.378746  
H -3.804342 -1.505959 1.645013  
H -3.205813 0.036539 2.308715  
H -4.159445 0.027175 0.810616  
C -2.412528 -1.607776 -0.665421  
H -3.395951 -1.314155 -1.069770  
H -2.556754 -2.625136 -0.268596  
C -1.435528 -1.648010 -1.864556  
C -0.014533 -2.134633 -1.653004  
C 1.011374 -1.286099 -1.843349  
C 2.492396 -1.540729 -1.688304  
H 2.735229 -2.572167 -1.992757  
H 3.030370 -0.888213 -2.395774  
C 3.089550 -1.347122 -0.272008  
H 2.704412 -2.147616 0.380836  
H 4.182485 -1.483848 -0.329611  
C 2.790389 -0.018356 0.449060  
C 3.321566 -0.066534 1.881329  
H 2.863487 -0.895259 2.440431  
H 3.125891 0.877089 2.408063  
H 4.411053 -0.221739 1.869102  
C 3.367409 1.197883 -0.299172  
H 2.987222 1.186428 -1.335927  
H 4.465895 1.098253 -0.348682  
O 3.068658 2.422359 0.336266  
H 2.187929 2.724679 0.040629  
H 0.748168 -0.257804 -2.108096  
C 0.146950 -3.578205 -1.253636  
H -0.281279 -3.772710 -0.255238  
H -0.389985 -4.242135 -1.953956  
H 1.199739 -3.891604 -1.223996  
H -1.916922 -2.303255 -2.614733

H -1.387638 -0.651963 -2.329558  
C -0.944604 -1.292412 1.414485  
H -0.212424 -1.686404 0.699115  
C -1.393150 -2.447894 2.310329  
H -0.511110 -2.953013 2.734065  
H -1.971085 -3.205334 1.759015  
H -2.011037 -2.102230 3.153419  
C -0.177145 -0.236773 2.225994  
H 0.579192 -0.733448 2.851242  
H -0.848092 0.314437 2.907039  
H 1.037064 1.549209 1.820902

2-c16,  $\Delta G = 1.4847$  kcal/mol, population = 3.26 %

O -1.432881 -0.136108 -0.251047  
C -0.702974 0.652709 -1.190394  
C 0.306968 1.363028 -0.346185  
C 1.512951 0.861892 -0.033651  
C 2.145903 1.773823 1.000066  
O 3.346206 2.305735 0.584116  
H 3.809125 2.681417 1.347528  
H 2.235744 1.273534 1.978941  
O 1.159429 2.827216 1.198082  
C 0.069201 2.583685 0.438839  
O -0.911998 3.301536 0.469898  
C 2.115082 -0.403136 -0.597501  
C 3.315061 0.006855 -1.486716  
H 4.009401 0.649058 -0.931907  
H 3.861914 -0.884058 -1.826082  
H 2.974545 0.562265 -2.373682  
C 2.658407 -1.303334 0.553512  
H 3.548417 -0.805645 0.974210  
H 3.040165 -2.226910 0.090487  
C 1.736842 -1.667104 1.744583  
C 0.457792 -2.413091 1.422920  
C -0.731751 -1.821672 1.625091  
C -2.097334 -2.302891 1.194251  
H -2.020025 -2.881413 0.258636  
H -2.512519 -3.003849 1.942353  
C -3.115779 -1.160698 1.028611  
H -4.125814 -1.581661 0.907247  
H -3.133413 -0.589923 1.973113  
C -2.854227 -0.172523 -0.140108  
C -3.479253 -0.650138 -1.450496

H -3.257421 0.051708 -2.267486  
H -4.573639 -0.720490 -1.356438  
H -3.086572 -1.641776 -1.721950  
C -3.412496 1.200498 0.290260  
H -2.929249 1.468751 1.246065  
H -4.492368 1.077057 0.491399  
O -3.242124 2.234595 -0.654661  
H -2.447756 2.732276 -0.379277  
H -0.716783 -0.827539 2.082166  
C 0.619524 -3.799175 0.852999  
H 1.076933 -4.468458 1.603661  
H -0.336761 -4.245473 0.547947  
H 1.291900 -3.813084 -0.020143  
H 2.357812 -2.274978 2.428921  
H 1.478091 -0.752978 2.301482  
C 1.033380 -1.169795 -1.442407  
H 0.419209 -1.713622 -0.718728  
C 1.626141 -2.192050 -2.414755  
H 2.115769 -1.710729 -3.275764  
H 0.825831 -2.837213 -2.809614  
H 2.367078 -2.847192 -1.932395  
C 0.050523 -0.242586 -2.172495  
H -0.672921 -0.852961 -2.734255  
H 0.572036 0.395923 -2.906705  
H -1.360000 1.358653 -1.713368

2-c13,  $\Delta G = 1.4885$  kcal/mol, population = 3.24 %

O 1.432734 0.108523 -0.232928  
C 0.686954 -0.669716 -1.167577  
C -0.334568 -1.355521 -0.317701  
C -1.536152 -0.838141 -0.015095  
C -2.200960 -1.752303 1.003072  
O -3.415821 -2.302898 0.653308  
H -3.354629 -2.670368 -0.242537  
H -2.349423 -1.251704 1.971215  
O -1.216968 -2.800166 1.230121  
C -0.113005 -2.567981 0.486014  
O 0.863899 -3.289203 0.539277  
C -2.117182 0.436138 -0.582316  
C -3.334699 0.053612 -1.459213  
H -4.061910 -0.532666 -0.883082  
H -3.845338 0.956132 -1.822275  
H -3.023424 -0.540833 -2.331768

C -2.633404 1.352139 0.569872  
H -3.532811 0.877939 0.997419  
H -2.995327 2.283275 0.106059  
C -1.697568 1.697433 1.754761  
C -0.412909 2.429716 1.423809  
C 0.771584 1.827227 1.622257  
C 2.138748 2.289656 1.176108  
H 2.059636 2.860220 0.235755  
H 2.568724 2.992545 1.913924  
C 3.142059 1.133983 1.012106  
H 4.155462 1.541758 0.874680  
H 3.163722 0.573635 1.962672  
C 2.856246 0.135770 -0.142141  
C 3.467728 0.593828 -1.465734  
H 4.563803 0.654482 -1.386527  
H 3.081264 1.586422 -1.742475  
H 3.228576 -0.114051 -2.272557  
C 3.406889 -1.238012 0.295621  
H 2.940176 -1.487513 1.264607  
H 4.492139 -1.126125 0.472635  
O 3.203812 -2.282373 -0.631510  
H 2.404632 -2.760815 -0.337389  
H 0.749065 0.836484 2.086069  
C -0.563031 3.814717 0.847957  
H 0.398423 4.255852 0.551833  
H -1.225954 3.829804 -0.032422  
H -1.025268 4.487995 1.592004  
H -2.305381 2.309757 2.446858  
H -1.445361 0.777075 2.304768  
C -1.022958 1.177293 -1.434343  
H -0.400890 1.716255 -0.713650  
C -1.597206 2.202709 -2.414392  
H -2.092557 1.723998 -3.273659  
H -0.785457 2.831989 -2.811323  
H -2.328225 2.873026 -1.937777  
C -0.053734 0.229524 -2.156306  
H 0.677979 0.824599 -2.723476  
H -0.584438 -0.407523 -2.885304  
H 1.329798 -1.391696 -1.686495

2-c4,  $\Delta G = 2.0959$  kcal/mol, population = 1.16 %

O 1.466917 -0.908551 0.908104  
C 0.708660 0.141647 1.487571

C -0.080986 0.985016 0.515308  
C -1.362834 0.758264 0.171768  
C -1.827739 1.889719 -0.734914  
O -2.913878 2.623111 -0.305212  
H -2.790107 2.866860 0.625557  
H -2.065085 1.544566 -1.748900  
O -0.662940 2.744388 -0.849890  
C 0.348334 2.250986 -0.103323  
O 1.410396 2.833184 -0.011834  
C -2.224456 -0.381606 0.660358  
C -3.377084 0.211705 1.509269  
H -4.012208 -0.595968 1.896536  
H -2.994544 0.785822 2.367074  
H -4.009131 0.873436 0.904773  
C -2.877714 -1.112956 -0.551840  
H -3.363634 -0.352381 -1.185302  
H -3.706149 -1.725145 -0.161501  
C -1.996652 -2.034811 -1.417725  
C -0.766003 -1.416611 -2.047972  
C 0.458504 -1.803242 -1.654065  
C 1.782193 -1.299065 -2.158410  
H 2.444236 -2.164636 -2.331543  
H 1.660325 -0.813529 -3.139071  
C 2.512781 -0.301490 -1.233535  
H 3.503581 -0.087330 -1.666722  
H 1.985076 0.660075 -1.235450  
C 2.726604 -0.748308 0.223466  
C 3.334166 -2.152290 0.301828  
H 4.236773 -2.223098 -0.322952  
H 2.613418 -2.910105 -0.032027  
H 3.607060 -2.385123 1.342892  
C 3.689289 0.209148 0.976558  
H 4.710742 -0.178976 0.837199  
H 3.465356 0.105638 2.058742  
O 3.732273 1.547573 0.560525  
H 2.842307 1.947662 0.520330  
H 0.513750 -2.558482 -0.865841  
C -0.986266 -0.402215 -3.150361  
H -0.733101 -0.828680 -4.136334  
H -2.038851 -0.088393 -3.208265  
H -0.368185 0.500097 -3.025440  
H -1.692698 -2.907937 -0.821675  
H -2.651133 -2.427154 -2.217806  
C -1.332123 -1.338508 1.518320

H -0.722157 -1.912835 0.811508  
C -2.127133 -2.342039 2.354274  
H -2.883304 -2.870227 1.753005  
H -2.643098 -1.861754 3.200036  
H -1.447312 -3.100730 2.772154  
C -0.318644 -0.563361 2.380422  
H 0.217785 -1.261829 3.039371  
H -0.823471 0.177465 3.021664  
H 1.356351 0.804148 2.089013

2-c35,  $\Delta G = 2.1524$  kcal/mol, population = 1.06 %

O 1.350200 0.093613 0.594063  
C 0.363517 0.596463 1.471188  
C -0.688977 1.160214 0.566013  
C -1.745381 0.468896 0.109467  
C -2.559277 1.386435 -0.790304  
O -3.828660 1.691294 -0.342083  
H -3.790382 1.905754 0.603486  
H -2.669807 1.003512 -1.814200  
O -1.746044 2.587562 -0.889583  
C -0.624749 2.447573 -0.143860  
O 0.267888 3.270323 -0.156541  
C -2.035220 -0.984391 0.393069  
C -3.396066 -1.102851 1.115734  
H -3.351156 -0.665105 2.125062  
H -4.182522 -0.581717 0.554176  
H -3.690570 -2.157119 1.212618  
C -2.134317 -1.753516 -0.963718  
H -3.131305 -1.552495 -1.390161  
H -2.132009 -2.830043 -0.729600  
C -1.107837 -1.458716 -2.084008  
C 0.357120 -1.782352 -1.861356  
C 1.266066 -0.791174 -1.860034  
C 2.761600 -0.875964 -1.662849  
H 3.159918 -1.775745 -2.162185  
H 3.218258 -0.007970 -2.158898  
C 3.263398 -0.927223 -0.200172  
H 2.962577 -1.895024 0.234401  
H 4.366377 -0.911996 -0.202368  
C 2.760743 0.159521 0.771781  
C 3.194770 -0.188694 2.198021  
H 2.783860 0.521025 2.931972  
H 4.291831 -0.153382 2.280454

H 2.864386 -1.201973 2.468641  
C 3.260057 1.581190 0.433069  
H 4.362870 1.560527 0.400876  
H 2.978702 2.253943 1.266226  
O 2.794191 2.087979 -0.793532  
H 1.914490 2.471856 -0.633753  
H 0.886577 0.228308 -1.973499  
C 0.698534 -3.237669 -1.672016  
H 0.275928 -3.851925 -2.486934  
H 1.782659 -3.413876 -1.637771  
H 0.271492 -3.634144 -0.734350  
H -1.458740 -2.036454 -2.959990  
H -1.180185 -0.401864 -2.380617  
C -0.869071 -1.577425 1.262305  
H -0.054549 -1.793969 0.560038  
C -1.232361 -2.883117 1.970298  
H -1.679588 -3.617898 1.283249  
H -1.939338 -2.724440 2.799430  
H -0.325089 -3.341027 2.394450  
C -0.278254 -0.557174 2.249615  
H 0.483880 -1.047914 2.871986  
H -1.049603 -0.161189 2.932025  
H 0.759674 1.379853 2.139428

2-c18,  $\Delta G = 2.3299$  kcal/mol, population = 0.78 %

O 1.440580 0.665250 -0.831506  
C 0.616267 -0.339660 -1.398226  
C -0.224002 -1.093383 -0.399026  
C -1.488180 -0.776549 -0.063754  
C -2.017779 -1.844720 0.881586  
O -3.129423 -2.542955 0.458893  
H -3.005856 -2.817853 -0.463332  
H -2.256236 -1.449258 1.878532  
O -0.892228 -2.745565 1.054619  
C 0.150003 -2.331838 0.303237  
O 1.199147 -2.943730 0.274617  
C -2.249474 0.433155 -0.551053  
C -3.484677 -0.033250 -1.357126  
H -4.099207 0.832507 -1.640296  
H -3.188670 -0.558675 -2.278140  
H -4.110457 -0.708859 -0.760942  
C -2.760447 1.280955 0.658263  
H -3.729163 0.866989 0.982792

H -2.990882 2.285287 0.271209  
C -1.891426 1.398846 1.931492  
C -0.448760 1.837300 1.792248  
C 0.536270 0.963927 2.064126  
C 2.024815 1.158815 2.045825  
H 2.291513 2.191271 1.781024  
H 2.392402 1.009993 3.077696  
C 2.782439 0.158069 1.150956  
H 3.833643 0.099845 1.477470  
H 2.371093 -0.851317 1.298831  
C 2.786916 0.481987 -0.352648  
C 3.436709 1.841255 -0.635194  
H 4.424203 1.916979 -0.156602  
H 2.801062 2.656129 -0.263932  
H 3.557471 1.980802 -1.720728  
C 3.579889 -0.577273 -1.155997  
H 4.640915 -0.282637 -1.122343  
H 3.269235 -0.481065 -2.217380  
O 3.534676 -1.904606 -0.702996  
H 2.626080 -2.198016 -0.497512  
H 0.231262 -0.047905 2.360673  
C -0.229998 3.276019 1.403604  
H -0.838799 3.552694 0.527533  
H -0.543614 3.948782 2.221713  
H 0.818509 3.498331 1.166123  
H -2.416572 2.114052 2.590753  
H -1.908667 0.441450 2.471628  
C -1.291242 1.288770 -1.451519  
H -0.628171 1.831031 -0.766423  
C -2.013310 2.320241 -2.319447  
H -2.571101 1.848097 -3.142983  
H -1.279167 3.006300 -2.769383  
H -2.722472 2.932401 -1.741547  
C -0.361095 0.411358 -2.304768  
H 0.219999 1.042997 -2.992202  
H -0.935411 -0.304759 -2.915568  
H 1.213411 -1.060216 -1.981878

2-c36,  $\Delta G = 2.4027$  kcal/mol, population = 0.69 %

O 1.353957 0.098815 0.599633  
C 0.369917 0.594635 1.484428  
C -0.686079 1.163717 0.587261  
C -1.741893 0.474471 0.127367

C -2.542260 1.390479 -0.780693  
O -3.785482 1.668014 -0.251809  
H -4.343038 2.057800 -0.941231  
H -2.609760 1.014213 -1.813810  
O -1.735715 2.598209 -0.864478  
C -0.623118 2.458607 -0.106970  
O 0.266368 3.285727 -0.103312  
C -2.030663 -0.979848 0.405812  
C -3.385169 -1.098099 1.139860  
H -3.681477 -2.152509 1.231590  
H -3.327093 -0.666679 2.150863  
H -4.172520 -0.564236 0.593178  
C -2.140430 -1.746014 -0.951343  
H -3.137362 -1.536002 -1.373985  
H -2.146541 -2.822774 -0.718401  
C -1.115686 -1.459662 -2.075842  
C 0.350208 -1.781242 -1.855751  
C 1.257521 -0.788480 -1.854644  
C 2.753981 -0.871138 -1.663079  
H 3.151706 -1.769370 -2.165674  
H 3.207240 -0.001656 -2.159835  
C 3.262374 -0.924124 -0.202779  
H 2.962484 -1.892104 0.232011  
H 4.365359 -0.909962 -0.210078  
C 2.764768 0.162147 0.772364  
C 3.205060 -0.187850 2.196266  
H 4.302516 -0.152437 2.273720  
H 2.876132 -1.201468 2.467351  
H 2.797437 0.520999 2.932857  
C 3.263917 1.584057 0.433088  
H 4.366222 1.561241 0.387536  
H 2.993763 2.254450 1.271791  
O 2.784344 2.096529 -0.785974  
H 1.906613 2.479539 -0.613945  
H 0.875866 0.230544 -1.964700  
C 0.694060 -3.236384 -1.669363  
H 0.276916 -3.849031 -2.488329  
H 1.778340 -3.410556 -1.629931  
H 0.262724 -3.636356 -0.735183  
H -1.468880 -2.042620 -2.947456  
H -1.188812 -0.404742 -2.378517  
C -0.860128 -1.578487 1.265473  
H -0.048356 -1.789453 0.558514  
C -1.219145 -2.889414 1.966090

H -0.309357 -3.349800 2.382234  
H -1.669692 -3.619704 1.276430  
H -1.921790 -2.737223 2.800103  
C -0.266359 -0.564999 2.257713  
H 0.498840 -1.059220 2.873682  
H -1.035518 -0.174745 2.945838  
H 0.768266 1.374126 2.155882

2-c6,  $\Delta G = 2.4159$  kcal/mol, population = 0.68 %

O 1.701062 0.690200 -0.710048  
C 0.866644 -0.272076 -1.363783  
C -0.091323 -1.027948 -0.481680  
C -1.372488 -0.674999 -0.269994  
C -2.027038 -1.738197 0.600475  
O -3.154546 -2.355170 0.091358  
H -2.978264 -2.646770 -0.816778  
H -2.309647 -1.344765 1.585035  
O -0.981164 -2.707977 0.818611  
C 0.151763 -2.337970 0.161411  
O 1.140102 -3.032630 0.159309  
C -2.074603 0.525854 -0.861187  
C -3.145398 0.009346 -1.856132  
H -3.658282 0.856969 -2.329951  
H -2.697485 -0.607055 -2.650376  
H -3.902667 -0.591491 -1.338225  
C -2.828228 1.318955 0.248684  
H -3.444110 0.605081 0.820140  
H -3.553768 1.980825 -0.250282  
C -1.999295 2.189855 1.212891  
C -0.930246 1.475833 2.011732  
C 0.369566 1.703951 1.760990  
C 1.547980 1.058385 2.433513  
H 2.288069 1.836855 2.684242  
H 1.246848 0.611029 3.392940  
C 2.242241 -0.041469 1.605012  
H 3.107483 -0.409363 2.182278  
H 1.570079 -0.900667 1.504436  
C 2.763065 0.358451 0.212533  
C 3.596513 1.639934 0.276995  
H 4.090660 1.816308 -0.687832  
H 4.369854 1.554913 1.055062  
H 2.962911 2.507331 0.504776  
C 3.605528 -0.785342 -0.377155



H 3.015837 -1.717740 -0.358213  
H 4.490257 -0.941689 0.259990  
O 4.066035 -0.494093 -1.685403  
H 3.374396 0.023873 -2.122172  
H 0.613912 2.410287 0.963035  
C -1.401347 0.544477 3.108518  
H -2.465609 0.289956 2.995554  
H -0.829266 -0.394796 3.143063  
H -1.299977 1.021464 4.098887  
H -1.538761 3.016107 0.650932  
H -2.717476 2.658342 1.910347  
C -1.010390 1.405343 -1.595117  
H -0.441826 1.924266 -0.814752  
C -1.612282 2.475669 -2.506152  
H -2.068823 2.043022 -3.409718  
H -0.824683 3.170546 -2.836526  
H -2.382296 3.069616 -1.990099  
C 0.024931 0.548473 -2.344543  
H 0.699155 1.201347 -2.918577  
H -0.463852 -0.130175 -3.062526  
H 1.487164 -1.004978 -1.908430

2-c9,  $\Delta G = 2.4523$  kcal/mol, population = 0.64 %

O 1.633244 0.673015 -0.730717  
C 0.836786 -0.334226 -1.347835  
C -0.105548 -1.056606 -0.416661  
C -1.386371 -0.700151 -0.205957  
C -2.026494 -1.721423 0.723467  
O -3.134339 -2.390865 0.236362  
H -2.943498 -2.713222 -0.658232  
H -2.329312 -1.282604 1.682338  
O -0.962950 -2.654400 1.006502  
C 0.162323 -2.311131 0.320775  
O 1.163250 -2.986094 0.373045  
C -2.102509 0.468318 -0.845601  
C -3.195844 -0.096300 -1.787785  
H -3.933467 -0.680240 -1.223982  
H -3.728583 0.725410 -2.285327  
H -2.764193 -0.744783 -2.565456  
C -2.827610 1.321032 0.239416  
H -3.427150 0.640033 0.866163  
H -3.567601 1.953346 -0.276329  
C -1.977955 2.249425 1.130340

C -0.858032 1.605776 1.918925  
C 0.424321 1.889415 1.636137  
C 1.639765 1.320523 2.314262  
H 2.383735 2.123163 2.450774  
H 1.384400 0.972327 3.327360  
C 2.308564 0.141811 1.576825  
H 3.197786 -0.163420 2.154110  
H 1.635343 -0.725049 1.589193  
C 2.752859 0.393156 0.120695  
C 3.615647 1.652896 0.010558  
H 3.987128 1.773643 -1.018771  
H 4.474297 1.603886 0.696669  
H 3.027289 2.549957 0.245487  
C 3.550836 -0.834174 -0.366577  
H 2.958441 -1.744644 -0.208601  
H 4.457952 -0.918321 0.261599  
O 3.871427 -0.797988 -1.743203  
H 4.427796 -0.025789 -1.910855  
H 0.621146 2.581087 0.812469  
C -1.249755 0.677448 3.050102  
H -1.027210 1.131828 4.030859  
H -2.328061 0.460924 3.042033  
H -0.710751 -0.281900 3.015404  
H -1.561929 3.059981 0.513671  
H -2.679557 2.733598 1.834448  
C -1.053900 1.309107 -1.644238  
H -0.472350 1.865266 -0.900177  
C -1.674388 2.330786 -2.597189  
H -2.138235 1.853776 -3.474478  
H -0.895920 3.014599 -2.969807  
H -2.442834 2.944323 -2.101932  
C -0.028103 0.417215 -2.362376  
H 0.633528 1.038613 -2.983942  
H -0.525530 -0.305002 -3.030347  
H 1.485152 -1.062885 -1.857060

2-c11,  $\Delta G = 2.5025$  kcal/mol, population = 0.58 %

O -1.599212 0.899810 0.823544  
C -0.763260 -0.050456 1.486508  
C 0.085085 -0.919640 0.582073  
C 1.366773 -0.652207 0.262986  
C 1.926536 -1.817277 -0.538004  
O 3.018893 -2.467749 -0.000876

H 2.857988 -2.645644 0.939037  
H 2.205519 -1.530960 -1.559387  
O 0.808546 -2.726563 -0.655325  
C -0.266245 -2.233739 0.000110  
O -1.313935 -2.848946 0.021217  
C 2.152933 0.572313 0.667227  
C 3.313496 0.126885 1.591522  
H 2.940179 -0.386038 2.490879  
H 3.993821 -0.553654 1.065236  
H 3.895904 1.000443 1.913665  
C 2.795787 1.227399 -0.594098  
H 3.354593 0.447886 -1.137793  
H 3.565914 1.932005 -0.242390  
C 1.880867 1.997001 -1.567669  
C 0.721359 1.228418 -2.166829  
C -0.539809 1.537210 -1.822791  
C -1.805852 0.882478 -2.299906  
H -2.506216 1.672311 -2.622074  
H -1.610467 0.272496 -3.195163  
C -2.526795 -0.020324 -1.272013  
H -3.495808 -0.317462 -1.706781  
H -1.965393 -0.951704 -1.152217  
C -2.811180 0.590905 0.117582  
C -3.499878 1.953666 -0.028160  
H -4.418961 1.867520 -0.626352  
H -2.834327 2.675963 -0.517330  
H -3.758988 2.353934 0.962967  
C -3.770591 -0.293008 0.946553  
H -4.713907 -0.365386 0.367411  
H -4.008600 0.258188 1.871820  
O -3.322808 -1.565909 1.344523  
H -2.749970 -1.990208 0.677363  
H -0.676578 2.347429 -1.102337  
C 1.055260 0.152836 -3.179204  
H 2.128470 -0.088755 -3.175652  
H 0.496529 -0.779889 -3.008188  
H 0.814982 0.487554 -4.203098  
H 1.492628 2.895043 -1.064844  
H 2.530878 2.362775 -2.383594  
C 1.187223 1.552399 1.407111  
H 0.563583 2.017302 0.634518  
C 1.899279 2.678668 2.156879  
H 2.418153 2.314627 3.057056  
H 1.164827 3.431119 2.483664

H 2.639723 3.191849 1.523881  
C 0.202864 0.799278 2.316576  
H -0.390332 1.519176 2.899482  
H 0.736699 0.154926 3.034458  
H -1.370733 -0.700704 2.131295

2-c15,  $\Delta G = 2.5370$  kcal/mol, population = 0.55 %

O 1.642869 -0.671014 0.759114  
C 0.849851 0.341568 1.375454  
C -0.083436 1.067144 0.439681  
C -1.360626 0.708488 0.213317  
C -1.971070 1.699290 -0.760477  
O -3.077600 2.342396 -0.238967  
H -3.542601 2.795245 -0.957445  
H -2.196973 1.232911 -1.730673  
O -0.912349 2.647078 -1.016450  
C 0.193515 2.321279 -0.293406  
O 1.188892 3.007142 -0.317106  
C -2.089210 -0.445206 0.863860  
C -3.166838 0.150272 1.805720  
H -3.726898 -0.657385 2.296970  
H -2.712558 0.780616 2.584697  
H -3.874373 0.770825 1.244871  
C -2.830684 -1.296334 -0.210657  
H -3.420180 -0.611524 -0.842751  
H -3.580411 -1.912027 0.311357  
C -1.996179 -2.246811 -1.093585  
C -0.882176 -1.621020 -1.905292  
C 0.402877 -1.871921 -1.604145  
C 1.617878 -1.313545 -2.291562  
H 2.353916 -2.123073 -2.432056  
H 1.360021 -0.963042 -3.302984  
C 2.301418 -0.142165 -1.555978  
H 3.189253 0.156766 -2.138749  
H 1.634525 0.729468 -1.563915  
C 2.755260 -0.397559 -0.102864  
C 3.611978 -1.662221 -0.002751  
H 4.465019 -1.616073 -0.696180  
H 3.016663 -2.555373 -0.235129  
H 3.991982 -1.787612 1.022940  
C 3.564426 0.824738 0.378459  
H 2.976408 1.738737 0.224031  
H 4.468293 0.902821 -0.255244

O 3.893413 0.787101 1.753097  
H 4.441432 0.008503 1.918887  
H 0.604545 -2.527097 -0.752708  
C -1.286959 -0.753929 -3.079350  
H -2.354923 -0.492830 -3.042513  
H -0.709948 0.181656 -3.132650  
H -1.128265 -1.284613 -4.034239  
H -1.576148 -3.046344 -0.465176  
H -2.706614 -2.741635 -1.781014  
C -1.053770 -1.292615 1.672633  
H -0.478456 -1.866962 0.937754  
C -1.691124 -2.293578 2.636591  
H -2.155869 -1.797360 3.502456  
H -0.921972 -2.979168 3.025139  
H -2.462721 -2.906653 2.145655  
C -0.019689 -0.406407 2.387865  
H 0.637470 -1.032282 3.009943  
H -0.512093 0.318912 3.056194  
H 1.502747 1.065600 1.885725

2-c17,  $\Delta G = 2.6763$  kcal/mol, population = 0.44 %

O -1.609855 -0.898732 -0.862995  
C -0.771457 0.053732 -1.523194  
C 0.064259 0.927029 -0.613055  
C 1.340526 0.660442 -0.272310  
C 1.865572 1.803258 0.574405  
O 2.961845 2.420630 0.009656  
H 3.387382 2.978847 0.676823  
H 2.061767 1.491011 1.609975  
O 0.752573 2.724375 0.653371  
C -0.300246 2.239832 -0.039601  
O -1.345400 2.859222 -0.093124  
C 2.141290 -0.551511 -0.684448  
C 3.285182 -0.079647 -1.617094  
H 2.889395 0.409815 -2.519293  
H 3.935217 0.638240 -1.104836  
H 3.894935 -0.938780 -1.928531  
C 2.801855 -1.207483 0.566503  
H 3.355041 -0.425336 1.112303  
H 3.578098 -1.899409 0.203565  
C 1.901823 -1.998084 1.538146  
C 0.747876 -1.240694 2.163235  
C -0.514172 -1.514335 1.792161

C -1.781623 -0.866967 2.274325  
H -2.475134 -1.661237 2.601021  
H -1.588152 -0.253789 3.167530  
C -2.514070 0.026568 1.245938  
H -3.480574 0.321431 1.687564  
H -1.958809 0.960216 1.118076  
C -2.811376 -0.591752 -0.139003  
C -3.492239 -1.956706 0.024302  
H -3.757029 -2.367428 -0.960909  
H -4.407032 -1.868374 0.628838  
H -2.820404 -2.671614 0.515782  
C -3.787515 0.283090 -0.959303  
H -4.716237 0.369828 -0.358481  
H -4.050884 -0.283303 -1.868291  
O -3.344136 1.545338 -1.392843  
H -2.768393 1.988669 -0.739993  
H -0.651961 -2.289730 1.035006  
C 1.095287 -0.227191 3.231988  
H 0.470276 0.676632 3.181103  
H 0.961154 -0.660135 4.238850  
H 2.149154 0.083313 3.170769  
H 1.509254 -2.886619 1.021816  
H 2.561199 -2.377796 2.339800  
C 1.188001 -1.540377 -1.429097  
H 0.565289 -2.013780 -0.661346  
C 1.915529 -2.657992 -2.177308  
H 2.435736 -2.286355 -3.073496  
H 1.190839 -3.417472 -2.509823  
H 2.657956 -3.165087 -1.541728  
C 0.201464 -0.796789 -2.343912  
H -0.386599 -1.523320 -2.923916  
H 0.733274 -0.154141 -3.064745  
H -1.378055 0.697972 -2.174609

2-c21,  $\Delta G = 2.7002$  kcal/mol, population = 0.42 %

O -1.573459 0.496695 0.680474  
C -0.721182 -0.484931 1.261326  
C 0.226865 -1.140823 0.289607  
C 1.497379 -0.748056 0.080939  
C 2.153591 -1.723787 -0.883399  
O 3.256337 -2.406808 -0.401943  
H 3.054853 -2.755705 0.480655  
H 2.471973 -1.246969 -1.820872

O 1.096585 -2.647545 -1.221705  
C -0.034840 -2.346369 -0.526747  
O -1.038781 -3.010732 -0.634879  
C 2.167259 0.453184 0.707175  
C 3.323409 -0.026014 1.617333  
H 2.947122 -0.605334 2.474129  
H 4.026149 -0.655839 1.057948  
H 3.881191 0.836994 2.007193  
C 2.781935 1.377480 -0.391087  
H 3.779706 0.986557 -0.649356  
H 2.968420 2.354240 0.080541  
C 2.032266 1.578760 -1.727752  
C 0.571552 1.973045 -1.683279  
C -0.358820 1.089481 -2.082572  
C -1.849664 1.236000 -2.166859  
H -2.181839 2.209418 -1.779290  
H -2.127555 1.231582 -3.237075  
C -2.628597 0.088800 -1.494205  
H -3.630190 0.019359 -1.948489  
H -2.128504 -0.867709 -1.715881  
C -2.819209 0.209579 0.032018  
C -3.700881 1.412857 0.381521  
H -3.855410 1.467850 1.469876  
H -4.679128 1.348201 -0.118263  
H -3.212981 2.349786 0.079468  
C -3.473311 -1.087192 0.543112  
H -2.839526 -1.943774 0.279121  
H -4.432800 -1.212075 0.006713  
O -3.651770 -1.133090 1.945956  
H -4.259897 -0.427932 2.204204  
H 0.003735 0.109434 -2.417736  
C 0.274461 3.377843 -1.227451  
H -0.791107 3.539411 -1.016061  
H 0.841170 3.634590 -0.317790  
H 0.581579 4.106958 -1.998509  
H 2.595028 2.353010 -2.280659  
H 2.121152 0.665676 -2.333722  
C 1.094050 1.232885 1.542048  
H 0.473605 1.772447 0.816031  
C 1.681662 2.257986 2.513497  
H 2.180378 1.776314 3.368960  
H 0.875426 2.890162 2.916824  
H 2.411803 2.925365 2.031282  
C 0.133355 0.281306 2.269888

H -0.540122 0.855347 2.923239  
H 0.685037 -0.429003 2.907997  
H -1.319536 -1.251680 1.773402

2-c24,  $\Delta G = 2.7673$  kcal/mol, population = 0.37 %

O -1.418992 -0.386657 -0.530139  
C -0.546594 0.139954 -1.514647  
C 0.418367 1.001848 -0.757311  
C 1.578457 0.561843 -0.242482  
C 2.236483 1.716128 0.499864  
O 3.463003 2.131243 0.024394  
H 3.422448 2.209526 -0.941713  
H 2.366375 1.512756 1.570866  
O 1.264106 2.790549 0.407475  
C 0.183546 2.378544 -0.293528  
O -0.793142 3.086151 -0.439246  
C 2.142885 -0.831618 -0.388726  
C 3.446620 -0.727468 -1.218307  
H 3.251822 -0.311074 -2.218782  
H 4.178313 -0.082128 -0.715267  
H 3.901311 -1.719444 -1.342213  
C 2.524184 -1.395397 1.019887  
H 3.070109 -0.609521 1.566508  
H 3.270021 -2.190878 0.862690  
C 1.425274 -2.000575 1.926939  
C 0.184990 -1.175032 2.205398  
C -1.020175 -1.614561 1.806643  
C -2.343860 -0.905786 1.914070  
H -2.886922 -1.283298 2.802198  
H -2.204410 0.172344 2.066633  
C -3.258414 -1.134836 0.692168  
H -3.289192 -2.217949 0.482664  
H -4.290486 -0.841386 0.941047  
C -2.842726 -0.398521 -0.606968  
C -3.321957 -1.169158 -1.840090  
H -4.416710 -1.284029 -1.826493  
H -2.869545 -2.171511 -1.855115  
H -3.049830 -0.649948 -2.772540  
C -3.418785 1.030373 -0.662902  
H -4.516853 0.938291 -0.730406  
H -3.085836 1.513491 -1.600268  
O -3.110134 1.834106 0.449873  
H -2.297942 2.323802 0.230732

H -1.061162 -2.589151 1.304093  
C 0.354120 0.141830 2.931846  
H 1.396775 0.306430 3.241441  
H 0.045649 0.999743 2.311926  
H -0.262703 0.182430 3.844207  
H 1.111650 -2.968311 1.506490  
H 1.928598 -2.237985 2.883097  
C 1.080685 -1.740015 -1.097595  
H 0.350693 -2.006056 -0.326630  
C 1.660361 -3.042568 -1.649261  
H 2.291935 -2.875156 -2.535580  
H 0.843910 -3.717655 -1.950108  
H 2.267167 -3.572519 -0.898560  
C 0.259345 -0.992304 -2.162525  
H -0.432661 -1.696296 -2.648443  
H 0.905674 -0.574926 -2.953680  
H -1.087975 0.733092 -2.269870

2-c14,  $\Delta G = 2.7742$  kcal/mol, population = 0.37 %

O 1.504571 0.632342 -0.838184  
C 0.627970 -0.340814 -1.400696  
C -0.232394 -1.067904 -0.392904  
C -1.496479 -0.720583 -0.083581  
C -2.079358 -1.774749 0.843346  
O -3.175546 -2.463994 0.365241  
H -3.011081 -2.732006 -0.552660  
H -2.365743 -1.373818 1.825170  
O -0.973020 -2.680970 1.076005  
C 0.107693 -2.289845 0.364958  
O 1.156429 -2.899437 0.436323  
C -2.214114 0.519250 -0.559453  
C -3.463100 0.112526 -1.375267  
H -3.183389 -0.401885 -2.307525  
H -4.110286 -0.557135 -0.795254  
H -4.048976 1.003791 -1.639538  
C -2.694979 1.365119 0.664933  
H -3.682343 0.987444 0.977234  
H -2.880196 2.385029 0.294730  
C -1.830588 1.424833 1.946571  
C -0.364487 1.785570 1.826964  
C 0.567480 0.855111 2.097992  
C 2.064501 0.965796 2.096156  
H 2.389895 1.994213 1.889299

H 2.414591 0.742309 3.120356  
C 2.781932 -0.025533 1.155495  
H 3.826916 -0.137636 1.487542  
H 2.324518 -1.018946 1.266809  
C 2.821443 0.369075 -0.336161  
C 3.546537 1.709667 -0.517407  
H 4.540482 1.692288 -0.047107  
H 2.961964 2.523196 -0.069317  
H 3.663570 1.933905 -1.587923  
C 3.605616 -0.661934 -1.174630  
H 4.648938 -0.635899 -0.801375  
H 3.634134 -0.288857 -2.213499  
O 3.134348 -1.988306 -1.220447  
H 2.571069 -2.221371 -0.458423  
H 0.202170 -0.139770 2.382631  
C -0.062719 3.215560 1.463042  
H 0.999773 3.385360 1.245881  
H -0.640953 3.537120 0.581624  
H -0.354300 3.891682 2.286433  
H -2.322775 2.161224 2.607813  
H -1.904367 0.465290 2.477849  
C -1.222514 1.355648 -1.438754  
H -0.544661 1.862883 -0.741232  
C -1.902062 2.425946 -2.293718  
H -1.141214 3.091602 -2.729830  
H -2.591731 3.054578 -1.709818  
H -2.472327 1.986906 -3.127054  
C -0.321494 0.455483 -2.295583  
H 0.284089 1.070919 -2.976673  
H -0.919009 -0.233644 -2.915332  
H 1.195550 -1.080412 -1.982254

2-c20,  $\Delta G = 2.7824$  kcal/mol, population = 0.36 %

O 1.426153 0.187642 -0.535554  
C 0.535991 -0.563435 -1.342338  
C -0.432015 -1.183191 -0.379695  
C -1.580404 -0.606084 0.011048  
C -2.245609 -1.516943 1.032992  
O -3.482946 -2.021819 0.690795  
H -3.454402 -2.348694 -0.222137  
H -2.360946 -1.039589 2.014893  
O -1.289178 -2.593520 1.216466  
C -0.210729 -2.395386 0.424659

O 0.754457 -3.132134 0.461449  
C -2.127648 0.710063 -0.488869  
C -3.441698 0.414235 -1.253441  
H -3.884184 1.346855 -1.628347  
H -3.263593 -0.251412 -2.112217  
H -4.176541 -0.065946 -0.594402  
C -2.485980 1.626852 0.727083  
H -3.036526 1.019000 1.463191  
H -3.222629 2.365791 0.373413  
C -1.369186 2.429593 1.437715  
C -0.137286 1.685067 1.912653  
C 1.069217 1.986032 1.404360  
C 2.384199 1.308503 1.683399  
H 2.941625 1.894877 2.439464  
H 2.231621 0.309303 2.111702  
C 3.288773 1.197747 0.437894  
H 3.332163 2.188595 -0.046163  
H 4.319319 0.962450 0.747450  
C 2.849134 0.155912 -0.622306  
C 3.325449 0.571737 -2.016658  
H 3.036205 -0.167650 -2.780041  
H 4.421742 0.668789 -2.040979  
H 2.886451 1.542764 -2.288727  
C 3.404714 -1.247503 -0.308688  
H 4.503101 -1.193965 -0.405973  
H 3.054467 -1.952382 -1.085448  
O 3.097812 -1.728925 0.977274  
H 2.276995 -2.246330 0.899136  
H 1.117817 2.795222 0.664831  
C -0.316320 0.605602 2.958158  
H 0.307288 0.795991 3.846685  
H -1.358289 0.541667 3.304973  
H -0.023145 -0.388391 2.581968  
H -1.047010 3.249483 0.777693  
H -1.858791 2.915537 2.302624  
C -1.061219 1.385772 -1.417389  
H -0.319219 1.831606 -0.747521  
C -1.629398 2.508969 -2.284924  
H -0.807315 3.069362 -2.757154  
H -2.220485 3.225653 -1.693660  
H -2.273092 2.126755 -3.092418  
C -0.261933 0.373752 -2.256842  
H 0.434018 0.915959 -2.914326  
H -0.922595 -0.224889 -2.907236

H 1.060922 -1.341185 -1.920979

2-c26,  $\Delta G = 2.8094$  kcal/mol, population = 0.35 %

O 1.421576 -0.392107 0.546199  
C 0.548988 0.137643 1.529710  
C -0.413830 1.002710 0.773293  
C -1.573202 0.564620 0.255656  
C -2.213771 1.712029 -0.504365  
O -3.420435 2.090618 0.043821  
H -3.889157 2.657566 -0.586108  
H -2.299105 1.503212 -1.581419  
O -1.244919 2.790006 -0.401399  
C -0.176705 2.381275 0.318866  
O 0.795854 3.091828 0.482311  
C -2.139590 -0.827320 0.401656  
C -3.438924 -0.719190 1.237349  
H -3.900321 -1.709249 1.353715  
H -3.233949 -0.311063 2.238733  
H -4.162111 -0.055702 0.747939  
C -2.524049 -1.389517 -1.006496  
H -3.068645 -0.602218 -1.552573  
H -3.271756 -2.183189 -0.848833  
C -1.427120 -1.998828 -1.914267  
C -0.183583 -1.178740 -2.195846  
C 1.019615 -1.617269 -1.789887  
C 2.344729 -0.911448 -1.901096  
H 2.886368 -1.293308 -2.788283  
H 2.206692 0.166251 -2.057971  
C 3.260061 -1.136124 -0.679050  
H 3.290782 -2.218431 -0.465267  
H 4.292069 -0.843700 -0.929677  
C 2.845307 -0.394979 0.617586  
C 3.333486 -1.156679 1.852906  
H 2.886972 -2.161575 1.874544  
H 3.060964 -0.634418 2.783542  
H 4.428903 -1.265067 1.836568  
C 3.414316 1.037160 0.664767  
H 4.513373 0.950789 0.725295  
H 3.084853 1.521505 1.602521  
O 3.092961 1.836125 -0.448104  
H 2.288882 2.333816 -0.217295  
H 1.057647 -2.587471 -1.278824  
C -0.345399 0.131848 -2.935279

H -1.386770 0.298394 -3.248209  
H -0.033521 0.993971 -2.322749  
H 0.273080 0.160347 -3.847082  
H -1.116094 -2.966531 -1.491742  
H -1.931595 -2.236842 -2.869678  
C -1.078958 -1.739347 1.108077  
H -0.348735 -2.005499 0.337586  
C -1.660899 -3.042178 1.656888  
H -0.845599 -3.718403 1.958638  
H -2.266591 -3.570669 0.904211  
H -2.294400 -2.875342 2.541891  
C -0.257688 -0.994938 2.175322  
H 0.433993 -1.700289 2.659983  
H -0.904605 -0.578696 2.966543  
H 1.091574 0.728688 2.285641

2-c30,  $\Delta G = 3.0290$  kcal/mol, population = 0.24 %

O -1.571445 0.491508 0.672345  
C -0.733661 -0.512005 1.233538  
C 0.218519 -1.147772 0.252203  
C 1.491449 -0.753792 0.061016  
C 2.149278 -1.704214 -0.927202  
O 3.249242 -2.402710 -0.461658  
H 3.044173 -2.776148 0.409981  
H 2.471735 -1.201999 -1.849917  
O 1.091828 -2.616184 -1.294446  
C -0.042039 -2.331280 -0.596213  
O -1.046152 -2.991520 -0.725337  
C 2.162648 0.426405 0.725104  
C 3.311919 -0.084416 1.626894  
H 4.015212 -0.700362 1.052939  
H 3.871065 0.764351 2.045017  
H 2.928470 -0.687063 2.464259  
C 2.787298 1.380257 -0.341922  
H 3.785455 0.993685 -0.605306  
H 2.973886 2.342225 0.159223  
C 2.047132 1.623284 -1.676995  
C 0.587557 2.021708 -1.630896  
C -0.343147 1.153334 -2.061368  
C -1.833029 1.306719 -2.151053  
H -2.165342 2.270326 -1.739891  
H -2.103810 1.330667 -3.222855  
C -2.619366 0.145076 -1.513026

H -3.617818 0.089326 -1.975816  
H -2.119364 -0.806850 -1.753884  
C -2.820475 0.233466 0.014371  
C -3.694150 1.433741 0.392035  
H -4.650195 1.409752 -0.152781  
H -3.177935 2.374555 0.155590  
H -3.899757 1.411349 1.470185  
C -3.484616 -1.061780 0.492141  
H -2.854529 -1.920853 0.211282  
H -4.443261 -1.162422 -0.051354  
O -3.690752 -1.006097 1.894467  
H -4.023091 -1.866443 2.181463  
H 0.018551 0.181835 -2.421546  
C 0.292161 3.413865 -1.136777  
H 0.852038 3.641485 -0.215186  
H 0.608711 4.164011 -1.883507  
H -0.774569 3.573384 -0.929674  
H 2.616541 2.411034 -2.203456  
H 2.136675 0.727818 -2.308668  
C 1.088577 1.186110 1.577383  
H 0.475262 1.750953 0.864708  
C 1.676011 2.177924 2.582973  
H 0.870731 2.801753 3.000946  
H 2.412413 2.855821 2.125516  
H 2.167284 1.667490 3.425969  
C 0.118139 0.218519 2.270659  
H -0.556552 0.777026 2.936078  
H 0.661886 -0.513444 2.890962  
H -1.343940 -1.287562 1.718541

2-c28,  $\Delta G = 3.2467$  kcal/mol, population = 0.17 %

O -1.635162 -0.490650 -0.701663  
C -0.735072 0.443442 -1.297551  
C 0.234338 1.119477 -0.363288  
C 1.499763 0.712654 -0.150838  
C 2.176778 1.716413 0.764303  
O 3.268724 2.310468 0.161502  
H 3.785506 2.775246 0.835940  
H 2.441912 1.279808 1.740576  
O 1.152098 2.697990 1.037706  
C 0.015724 2.393321 0.354636  
O -0.962077 3.102619 0.396960  
C 2.136929 -0.530286 -0.726378

C 3.274301 -0.115277 -1.690906  
H 3.984212 0.553239 -1.190757  
H 3.818927 -1.005898 -2.035514  
H 2.880212 0.410339 -2.573486  
C 2.768440 -1.408694 0.399267  
H 3.779523 -1.022219 0.607206  
H 2.925279 -2.410152 -0.028878  
C 2.058250 -1.531721 1.767254  
C 0.580071 -1.855955 1.783918  
C -0.293663 -0.906743 2.160088  
C -1.786398 -0.969638 2.288832  
H -2.174406 -1.959239 2.011120  
H -2.033782 -0.842025 3.358602  
C -2.531378 0.139916 1.518972  
H -3.504476 0.316982 2.004915  
H -1.977736 1.087032 1.606823  
C -2.825118 -0.143537 0.033642  
C -3.715945 -1.378146 -0.126808  
H -4.615313 -1.292691 0.501414  
H -3.171740 -2.288286 0.159561  
H -4.029508 -1.479057 -1.174211  
C -3.512146 1.082289 -0.589760  
H -2.861573 1.964689 -0.463673  
H -4.441649 1.281871 -0.034551  
O -3.874322 0.891447 -1.946297  
H -3.137983 0.451067 -2.392292  
H 0.125386 0.069287 2.434970  
C 0.203231 -3.266105 1.410832  
H -0.873736 -3.385946 1.232004  
H 0.734590 -3.597241 0.503992  
H 0.494566 -3.967590 2.212905  
H 2.603499 -2.312156 2.328441  
H 2.209534 -0.603498 2.336438  
C 1.031858 -1.330131 -1.496886  
H 0.405084 -1.807545 -0.733484  
C 1.575093 -2.428723 -2.412160  
H 2.074198 -2.015731 -3.302516  
H 0.744857 -3.060222 -2.764714  
H 2.292672 -3.086870 -1.899717  
C 0.091350 -0.395033 -2.271725  
H -0.598614 -0.987133 -2.890714  
H 0.656250 0.267013 -2.947936  
H -1.290656 1.228076 -1.838967

2-c34,  $\Delta G = 3.3490$  kcal/mol, population = 0.14 %

O 1.573567 -0.498597 0.678752  
C 0.745011 0.509183 1.247812  
C -0.202648 1.158946 0.271253  
C -1.477000 0.772394 0.075382  
C -2.115541 1.713813 -0.928351  
O -3.186739 2.398990 -0.385798  
H -3.683817 2.820904 -1.101875  
H -2.395817 1.203095 -1.863433  
O -1.055760 2.629181 -1.282748  
C 0.067059 2.346864 -0.567094  
O 1.071742 3.010208 -0.679182  
C -2.156849 -0.403061 0.737836  
C -3.290718 0.119212 1.652697  
H -2.888048 0.694109 2.500085  
H -3.970989 0.773387 1.095273  
H -3.870387 -0.724306 2.053935  
C -2.802670 -1.343709 -0.327367  
H -3.791700 -0.933826 -0.590449  
H -3.011503 -2.299921 0.175858  
C -2.069663 -1.607482 -1.663161  
C -0.613173 -2.017682 -1.619873  
C 0.324037 -1.155608 -2.049181  
C 1.812629 -1.320454 -2.141797  
H 2.138652 -2.284599 -1.726873  
H 2.080138 -1.351943 -3.214266  
C 2.610640 -0.162123 -1.511822  
H 3.606507 -0.114374 -1.981032  
H 2.115627 0.792786 -1.752081  
C 2.820371 -0.248491 0.014635  
C 3.689856 -1.452953 0.389087  
H 3.167837 -2.391453 0.156168  
H 3.900985 -1.430548 1.466186  
H 4.643385 -1.434446 -0.160418  
C 3.494779 1.043554 0.486439  
H 2.866778 1.905700 0.210899  
H 4.449571 1.139186 -0.064857  
O 3.712486 0.987432 1.887145  
H 4.043312 1.849041 2.172084  
H -0.030062 -0.180502 -2.406969  
C -0.328614 -3.413179 -1.128697  
H -0.886440 -3.636329 -0.204704  
H -0.656003 -4.159271 -1.874818



H 0.737517 -3.583428 -0.927010  
H -2.648138 -2.394804 -2.180182  
H -2.153277 -0.717187 -2.302654  
C -1.086822 -1.178921 1.579913  
H -0.477698 -1.741031 0.861672  
C -1.679021 -2.175984 2.577498  
H -0.876958 -2.808272 2.989085  
H -2.419745 -2.845631 2.114937  
H -2.166612 -1.670681 3.425715  
C -0.109600 -0.223487 2.280629  
H 0.562293 -0.791622 2.940805  
H -0.648215 0.507016 2.906857  
H 1.363317 1.275901 1.736658

2-c5,  $\Delta G = 3.6358$  kcal/mol, population = 0.09 %

O 1.477979 0.851095 -0.944497  
C 0.639560 -0.124464 -1.560576  
C -0.148667 -0.989013 -0.608259  
C -1.409442 -0.731392 -0.213766  
C -1.882060 -1.876303 0.671049  
O -3.010068 -2.556578 0.250327  
H -2.913778 -2.783522 -0.687786  
H -2.083566 -1.552904 1.700151  
O -0.750454 -2.769578 0.724933  
C 0.264586 -2.294698 -0.048178  
O 1.293629 -2.911975 -0.190043  
C -2.253014 0.448710 -0.639464  
C -3.416630 -0.084723 -1.513265  
H -3.045695 -0.631586 -2.393394  
H -4.061141 -0.758348 -0.935481  
H -4.036173 0.750398 -1.866573  
C -2.894300 1.137472 0.602970  
H -3.374716 0.357622 1.216485  
H -3.724896 1.764521 0.242193  
C -1.999983 2.027704 1.487797  
C -0.774835 1.372664 2.088571  
C 0.455169 1.733821 1.687038  
C 1.761889 1.166289 2.165690  
H 2.478765 1.991085 2.314262  
H 1.636852 0.695262 3.153015  
C 2.398990 0.119689 1.229481  
H 3.361480 -0.184759 1.673442  
H 1.778278 -0.785064 1.214205

C 2.685763 0.551661 -0.223157  
C 3.475313 1.859941 -0.269664  
H 3.704182 2.117665 -1.314687  
H 4.420120 1.755439 0.280668  
H 2.895300 2.685831 0.164139  
C 3.486913 -0.548071 -0.956417  
H 3.604309 -0.235378 -2.007315  
H 2.928239 -1.495970 -0.938667  
O 4.790240 -0.722451 -0.426168  
H 4.728247 -1.314933 0.334000  
H 0.529892 2.501467 0.911871  
C -1.007218 0.339400 3.170842  
H -0.741082 0.740681 4.164033  
H -2.065056 0.043466 3.227259  
H -0.407199 -0.571325 3.022971  
H -1.690192 2.913776 0.914319  
H -2.643184 2.404384 2.304248  
C -1.347561 1.431343 -1.450642  
H -0.710334 1.940856 -0.719025  
C -2.125135 2.508226 -2.208348  
H -1.429993 3.272237 -2.589931  
H -2.856769 3.019315 -1.563599  
H -2.667420 2.097073 -3.073934  
C -0.373063 0.684494 -2.375880  
H 0.181147 1.407853 -2.992270  
H -0.911978 0.011487 -3.062691  
H 1.228154 -0.776629 -2.226616

2-c10,  $\Delta G = 3.9169$  kcal/mol, population = 0.05 %

O -1.469710 -0.801083 -0.992199  
C -0.632824 0.207113 -1.553056  
C 0.150940 1.024098 -0.556070  
C 1.409055 0.746454 -0.166951  
C 1.876662 1.846007 0.776132  
O 3.010725 2.542506 0.400321  
H 2.923709 2.816571 -0.525991  
H 2.067413 1.472038 1.790063  
O 0.747286 2.739405 0.862443  
C -0.262914 2.304329 0.059680  
O -1.287401 2.932551 -0.064312  
C 2.254643 -0.411762 -0.645744  
C 3.423525 0.164531 -1.484949  
H 4.045336 -0.651948 -1.875888

H 3.057484 0.754326 -2.339162  
H 4.064567 0.808521 -0.870705  
C 2.888331 -1.161823 0.564646  
H 3.363921 -0.412971 1.219221  
H 3.722267 -1.769133 0.178617  
C 1.990627 -2.096149 1.399231  
C 0.762217 -1.473910 2.027493  
C -0.466043 -1.818921 1.606797  
C -1.775264 -1.272453 2.103663  
H -2.495974 -2.101073 2.206055  
H -1.655974 -0.851462 3.114192  
C -2.397376 -0.178173 1.214399  
H -3.360516 0.128122 1.651622  
H -1.761777 0.715966 1.239170  
C -2.678186 -0.543069 -0.257353  
C -3.457209 -1.854894 -0.371197  
H -3.703406 -2.049608 -1.425879  
H -4.390885 -1.801872 0.204449  
H -2.855777 -2.697057 -0.002792  
C -3.478599 0.583813 -0.932353  
H -3.549261 0.349712 -2.013744  
H -2.941586 1.538423 -0.819304  
O -4.763044 0.652921 -0.336329  
H -5.162840 1.495169 -0.587269  
H -0.535984 -2.549208 0.795722  
C 0.988495 -0.492092 3.158082  
H 2.046368 -0.201163 3.236156  
H 0.391072 0.425701 3.047831  
H 0.713619 -0.937745 4.129726  
H 1.684291 -2.952451 0.780474  
H 2.631183 -2.512788 2.198239  
C 1.353974 -1.351206 -1.511814  
H 0.711632 -1.896909 -0.811356  
C 2.136152 -2.388402 -2.318551  
H 1.443261 -3.131524 -2.743090  
H 2.863510 -2.931944 -1.695857  
H 2.684137 -1.933809 -3.158456  
C 0.385351 -0.557163 -2.404073  
H -0.164092 -1.247731 -3.061064  
H 0.928573 0.151085 -3.050835  
H -1.222264 0.890855 -2.186471

Coordinates of the dominating

### conformers of **3**

3-c1,  $\Delta G = 0.0000$  kcal/mol, population = 83.43 %

C -0.614903 1.584914 1.985472  
C 0.347177 2.416651 1.174777  
C 1.674937 2.248558 1.035359  
C 2.508868 3.276034 0.308215  
H 1.885263 3.996449 -0.241060  
H 3.215156 2.819637 -0.404489  
H 3.132044 3.839486 1.025884  
C 2.454339 1.127445 1.688552  
C 3.169044 0.137943 0.748095  
H 3.751372 0.694670 -0.004572  
H 3.921408 -0.401192 1.343520  
C 2.324002 -0.941325 0.013745  
C 1.406177 -0.342497 -1.024126  
C 0.131014 -0.711903 -1.249641  
C -0.374693 0.007770 -2.432244  
O -1.455694 -0.043367 -2.974004  
O 0.623418 0.815371 -2.890547  
C 1.790972 0.656728 -2.077344  
H 2.622774 0.309880 -2.711321  
H 2.061260 1.635455 -1.659227  
C -0.632659 -1.702184 -0.420304  
H -1.284871 -2.305022 -1.078528  
C 0.367134 -2.592839 0.309377  
H -0.178354 -3.197720 1.049542  
H 0.814192 -3.294538 -0.413659  
C 1.462271 -1.776998 1.016739  
H 0.931684 -1.050340 1.647986  
C 2.287010 -2.671374 1.944147  
H 3.089321 -2.116263 2.452787  
H 2.747772 -3.510628 1.400483  
H 1.638154 -3.101569 2.722552  
O -1.440092 -1.063901 0.568973  
C -2.576448 -0.347850 0.110115  
H -2.798195 -0.678406 -0.924651  
O -3.653230 -0.647504 0.945033  
C -4.090777 -1.987902 0.871563  
H -4.379667 -2.259208 -0.161891  
H -3.308897 -2.689296 1.209128  
H -4.968573 -2.086913 1.525048  
C -2.362067 1.171783 0.118531  
C -3.559799 1.861668 -0.539552

H -4.473379 1.709844 0.055698  
H -3.384377 2.944746 -0.630781  
H -3.739728 1.460780 -1.549701  
H -1.476766 1.360244 -0.508846  
C -2.070756 1.730172 1.522921  
H -2.331703 2.802754 1.530088  
H -2.744974 1.245557 2.245757  
C 3.320350 -1.844079 -0.759152  
H 3.882967 -1.260239 -1.502256  
H 4.051475 -2.290718 -0.070997  
H 2.802340 -2.655093 -1.291057  
H 1.821272 0.578643 2.397423  
H 3.245578 1.596857 2.300927  
H -0.093312 3.302158 0.696583  
H -0.555642 1.903916 3.043766  
H -0.334716 0.524606 1.965374

3-c2,  $\Delta G = 1.4954$  kcal/mol, population = 6.67 %

C -0.200278 -2.061603 -1.121216  
C 1.089986 -2.566744 -0.538515  
C 2.319486 -2.052915 -0.722520  
C 3.533068 -2.708315 -0.110195  
H 4.199858 -3.103820 -0.897075  
H 3.256580 -3.538083 0.556482  
H 4.142600 -1.994498 0.470558  
C 2.607415 -0.852639 -1.601048  
C 3.098626 0.420929 -0.884388  
H 3.862342 0.152481 -0.136168  
H 3.629972 1.043148 -1.619829  
C 2.047029 1.338554 -0.197622  
C 1.326271 0.620872 0.915001  
C -0.000708 0.657014 1.147584  
C -0.282078 -0.087104 2.389995  
O -1.331866 -0.292556 2.957440  
O 0.897915 -0.563035 2.874535  
C 1.975522 -0.147442 2.029964  
H 2.669200 0.474834 2.618499  
H 2.514919 -1.038909 1.685976  
C -0.999597 1.419335 0.322486  
H -1.708045 1.919497 1.003804  
C -0.249006 2.456042 -0.508511  
H -0.943891 2.868733 -1.255004  
H 0.052431 3.289549 0.146480

C 0.981182 1.862986 -1.216987  
H 0.618315 0.984526 -1.771647  
C 1.538611 2.852191 -2.242075  
H 1.798888 3.816751 -1.779242  
H 0.783192 3.053381 -3.017202  
H 2.435791 2.465988 -2.747933  
O -1.728602 0.588540 -0.588252  
C -2.785327 -0.201634 -0.069040  
H -2.698651 -0.224991 1.032852  
O -4.030637 0.333662 -0.428656  
C -4.335215 1.588200 0.137517  
H -4.230800 1.574213 1.239555  
H -3.691524 2.391070 -0.263824  
H -5.379359 1.821701 -0.114550  
C -2.719518 -1.629602 -0.623906  
C -2.996501 -1.677061 -2.129244  
H -2.941324 -2.711907 -2.502552  
H -3.997568 -1.281762 -2.349061  
H -2.266814 -1.074178 -2.689584  
H -3.543838 -2.155926 -0.113171  
C -1.411985 -2.340748 -0.220333  
H -1.169008 -2.073130 0.820694  
H -1.595128 -3.429091 -0.207989  
C 2.826452 2.510581 0.450932  
H 3.525330 2.141225 1.215399  
H 3.420344 3.043839 -0.304582  
H 2.149981 3.231011 0.933277  
H 1.740808 -0.616001 -2.232057  
H 3.409516 -1.148627 -2.300055  
H 1.008341 -3.468093 0.083696  
H -0.370393 -2.545188 -2.100892  
H -0.140578 -0.986759 -1.321456

3-c4,  $\Delta G = 1.7746$  kcal/mol, population = 4.16 %

C 0.327410 2.165749 -0.956435  
C -0.876245 2.690068 -0.222609  
C -2.152737 2.290364 -0.370417  
C -3.265990 2.951373 0.405310  
H -3.945214 3.494587 -0.275716  
H -2.879273 3.665705 1.146691  
H -3.896342 2.217804 0.936938  
C -2.595192 1.240468 -1.369636  
C -3.180667 -0.066039 -0.795769

H -3.882472 0.169161 0.021039  
H -3.801471 -0.530413 -1.576496  
C -2.201242 -1.166185 -0.295287  
C -1.377489 -0.691976 0.875798  
C -0.058264 -0.903379 1.050687  
C 0.335037 -0.366822 2.368071  
O 1.415125 -0.345498 2.914997  
O -0.774602 0.156900 2.958424  
C -1.909838 -0.013426 2.104175  
H -2.664595 -0.619694 2.630599  
H -2.341229 0.973793 1.893596  
C 0.834840 -1.589655 0.054425  
H 1.568472 -2.226031 0.577309  
C -0.032054 -2.426174 -0.880133  
H 0.595353 -2.773369 -1.714563  
H -0.379793 -3.322991 -0.342252  
C -1.229410 -1.631984 -1.429876  
H -0.807278 -0.718199 -1.873478  
C -1.915121 -2.408711 -2.555593  
H -2.243714 -3.405781 -2.223782  
H -1.211442 -2.556230 -3.389192  
H -2.792445 -1.878399 -2.954880  
O 1.536664 -0.633643 -0.747454  
C 2.670809 -0.055628 -0.169139  
H 2.585014 -0.063454 0.932160  
O 3.776505 -0.862596 -0.532588  
C 4.886077 -0.764657 0.331071  
H 5.620504 -1.519852 0.016382  
H 5.370626 0.228668 0.287699  
H 4.601686 -0.961674 1.382487  
C 2.801395 1.399091 -0.640250  
C 3.030468 1.501020 -2.148954  
H 3.154661 2.550933 -2.458022  
H 3.935730 0.946827 -2.436539  
H 2.187312 1.076941 -2.713419  
H 3.704284 1.783941 -0.135430  
C 1.616149 2.242804 -0.122459  
H 1.396635 1.931766 0.913542  
H 1.931383 3.298109 -0.052427  
C -3.068238 -2.343538 0.219106  
H -3.697354 -2.027050 1.063627  
H -3.739540 -2.703724 -0.572871  
H -2.447509 -3.185096 0.558820  
H -1.783885 1.009308 -2.072000

H -3.392884 1.697290 -1.982165  
H -0.681772 3.499157 0.494236  
H 0.470812 2.743468 -1.888706  
H 0.161704 1.128071 -1.262989

3-c3,  $\Delta G = 1.9020$  kcal/mol, population = 3.35 %

C 0.799291 -1.559720 -1.875877  
C -0.116552 -2.527628 -1.169999  
C -1.440624 -2.385298 -0.976274  
C -2.244213 -3.451332 -0.276189  
H -2.690778 -3.078104 0.660404  
H -1.624322 -4.324404 -0.024411  
H -3.085356 -3.792844 -0.905394  
C -2.227547 -1.214709 -1.528838  
C -3.121331 -0.403777 -0.569993  
H -3.791008 0.212869 -1.192175  
H -3.788091 -1.078125 -0.010778  
C -2.422782 0.542012 0.447947  
C -1.422534 1.408917 -0.275117  
C -0.135868 1.594552 0.075212  
C 0.483478 2.545715 -0.866913  
O 1.611101 2.982191 -0.909461  
O -0.463408 2.909446 -1.778751  
C -1.703118 2.257265 -1.483548  
H -2.472605 3.022889 -1.294659  
H -2.014992 1.672041 -2.362905  
C 0.515943 0.944851 1.260731  
H 1.239391 1.635310 1.722512  
C -0.576769 0.547436 2.246508  
H -0.121509 -0.048199 3.051964  
H -0.994996 1.456613 2.709305  
C -1.680588 -0.273104 1.558835  
H -1.164880 -1.092529 1.039969  
C -2.618362 -0.887108 2.600107  
H -3.030212 -0.126399 3.281638  
H -2.069078 -1.616813 3.214859  
H -3.466278 -1.416743 2.140353  
O 1.195412 -0.258086 0.892185  
C 2.454253 -0.116688 0.311765  
H 2.428353 0.630257 -0.504942  
O 3.341200 0.355759 1.312241  
C 4.374763 1.186970 0.829744  
H 3.965839 2.058069 0.286335

H 4.948869 1.540427 1.698163  
H 5.065949 0.646888 0.155043  
C 2.887592 -1.480743 -0.238948  
C 2.661243 -2.595282 0.786556  
H 3.172608 -2.351121 1.730388  
H 1.594822 -2.732559 1.006978  
H 3.065265 -3.549785 0.414306  
H 3.977918 -1.391622 -0.386382  
C 2.304579 -1.760046 -1.641883  
H 2.830667 -1.102385 -2.354610  
H 2.580336 -2.790492 -1.927799  
C -3.500328 1.471945 1.055397  
H -3.946144 2.117720 0.284789  
H -4.313808 0.880149 1.498047  
H -3.078429 2.120376 1.837604  
H -2.903429 -1.626469 -2.301670  
H -1.554497 -0.532757 -2.065302  
H 0.347258 -3.452720 -0.808678  
H 0.521130 -0.526376 -1.621415  
H 0.634229 -1.644380 -2.967176

3-c12,  $\Delta G = 2.4303$  kcal/mol, population = 1.37 %

C -0.357777 2.171853 -1.359415  
C 0.982226 2.814491 -1.130461  
C 2.190300 2.221721 -1.124816  
C 3.435056 3.012953 -0.810028  
H 4.168047 2.945786 -1.633323  
H 3.944780 2.627940 0.089403  
H 3.206877 4.074282 -0.634613  
C 2.417385 0.776521 -1.516955  
C 3.101232 -0.150284 -0.491244  
H 3.617117 -0.947593 -1.050399  
H 3.902772 0.388726 0.035252  
C 2.201464 -0.847483 0.566084  
C 1.102459 -1.612396 -0.126320  
C -0.196866 -1.639007 0.232646  
C -0.901991 -2.612328 -0.629233  
O -2.050953 -2.983776 -0.614116  
O -0.001429 -3.107036 -1.528905  
C 1.289056 -2.543274 -1.289841  
H 2.001689 -3.355689 -1.074462  
H 1.629056 -2.026541 -2.201367  
C -0.769556 -0.900705 1.412643

H -1.493226 -1.556258 1.925787  
C 0.381072 -0.503858 2.335477  
H -0.010345 0.198159 3.086799  
H 0.738662 -1.392576 2.879600  
C 1.534044 0.157808 1.555842  
H 1.083549 0.945935 0.935740  
C 2.518673 0.831604 2.512046  
H 2.015369 1.646496 3.054880  
H 3.376608 1.270205 1.981642  
H 2.910545 0.128240 3.263347  
O -1.419537 0.330072 1.079584  
C -2.367653 0.359071 0.064572  
H -1.972014 -0.123137 -0.852469  
O -3.496628 -0.371169 0.491378  
C -4.365992 -0.772703 -0.543342  
H -4.886047 0.085003 -1.009257  
H -3.825609 -1.333571 -1.325486  
H -5.122233 -1.435476 -0.098979  
C -2.680699 1.843030 -0.226926  
C -3.607722 2.437109 0.836674  
H -4.563911 1.898119 0.888175  
H -3.137465 2.381537 1.831157  
H -3.817647 3.495807 0.618516  
H -3.199335 1.868165 -1.201785  
C -1.390127 2.668369 -0.335527  
H -1.656137 3.713593 -0.569210  
H -0.919602 2.683921 0.659789  
C 3.085035 -1.875949 1.314590  
H 3.954580 -1.376158 1.764512  
H 2.528407 -2.388100 2.112228  
H 3.467959 -2.642367 0.625279  
H 3.069415 0.796140 -2.408892  
H 1.475335 0.323518 -1.855121  
H 0.947887 3.888538 -0.904135  
H -0.259929 1.080013 -1.298102  
H -0.726145 2.389951 -2.380121

3-c19,  $\Delta G = 3.3020$  kcal/mol, population = 0.31 %

C -0.612071 1.606536 -1.754863  
C 0.385353 2.599107 -1.216359  
C 1.704174 2.393571 -1.043043  
C 2.590059 3.455431 -0.444080  
H 2.030902 4.379463 -0.236036

H 3.429936 3.701183 -1.117793  
H 3.042214 3.117908 0.503826  
C 2.403375 1.133282 -1.510724  
C 3.202596 0.305857 -0.484244  
H 3.862269 -0.370393 -1.052476  
H 3.882564 0.959932 0.082688  
C 2.408776 -0.566512 0.528705  
C 1.415374 -1.427306 -0.211043  
C 0.119924 -1.594563 0.113804  
C -0.505079 -2.505824 -0.860860  
O -1.649851 -2.887910 -0.944321  
O 0.455579 -2.895376 -1.747657  
C 1.705218 -2.280675 -1.414422  
H 2.447112 -3.068188 -1.204163  
H 2.058763 -1.704755 -2.283525  
C -0.564524 -0.937193 1.274952  
H -1.245303 -1.661017 1.756912  
C 0.503951 -0.468008 2.258296  
H 0.025065 0.168882 3.017173  
H 0.913346 -1.344851 2.786816  
C 1.630561 0.314652 1.562123  
H 1.140567 1.108112 0.980737  
C 2.534104 0.980403 2.602041  
H 3.397737 1.485945 2.145064  
H 2.921037 0.253316 3.333090  
H 1.966704 1.740024 3.161620  
O -1.310450 0.203985 0.860599  
C -2.652003 0.043774 0.439133  
H -2.932209 -1.024765 0.536138  
O -3.476734 0.829210 1.251042  
C -3.512293 0.434776 2.604562  
H -3.806937 -0.627518 2.707192  
H -2.534746 0.572693 3.098513  
H -4.258125 1.060811 3.113905  
C -2.821931 0.506538 -1.014361  
C -4.301976 0.587718 -1.392504  
H -4.827582 -0.354469 -1.165829  
H -4.805406 1.393457 -0.838383  
H -4.412708 0.785634 -2.470231  
H -2.361754 -0.283713 -1.629954  
C -2.057451 1.825300 -1.263106  
H -2.609681 2.434283 -1.997150  
H -2.054886 2.408395 -0.329078  
C 3.416027 -1.506325 1.234671

H 4.223991 -0.923176 1.698706  
H 2.928360 -2.106240 2.016829  
H 3.879762 -2.199346 0.517166  
H 3.128361 1.445629 -2.285025  
H 1.687274 0.482019 -2.028765  
H -0.018926 3.575512 -0.919175  
H -0.291699 0.597022 -1.469551  
H -0.605412 1.618062 -2.861752

3-c11,  $\Delta G = 3.4337$  kcal/mol, population = 0.25 %

C -1.245642 -0.210548 2.174175  
C -0.617154 -1.550294 1.882161  
C 0.690102 -1.865061 1.889218  
C 1.145581 -3.290090 1.693128  
H 0.292392 -3.968631 1.545891  
H 1.718254 -3.643145 2.569642  
H 1.814883 -3.400193 0.824271  
C 1.778562 -0.852544 2.173874  
C 2.904590 -0.687693 1.133082  
H 3.663930 -0.025099 1.580764  
H 3.417290 -1.649501 0.975978  
C 2.534352 -0.109243 -0.263453  
C 1.689485 1.127853 -0.095141  
C 0.502264 1.362300 -0.684487  
C 0.042101 2.711681 -0.313314  
O -0.953346 3.314249 -0.643643  
O 0.968054 3.254480 0.529625  
C 2.054089 2.340362 0.714856  
H 2.984115 2.818626 0.368423  
H 2.161807 2.127562 1.790176  
C -0.189504 0.391012 -1.596001  
H -0.741499 0.942445 -2.377568  
C 0.881707 -0.508665 -2.208698  
H 0.390066 -1.290962 -2.806685  
H 1.503499 0.086651 -2.898320  
C 1.741566 -1.160483 -1.114399  
H 1.027068 -1.628833 -0.426509  
C 2.623427 -2.261598 -1.705745  
H 1.993973 -3.073721 -2.101077  
H 3.299087 -2.703771 -0.957839  
H 3.242559 -1.889952 -2.537065  
O -1.095897 -0.439450 -0.875072  
C -2.474606 -0.133097 -0.883246

H -2.687309 0.461251 -1.799925  
O -3.185132 -1.331183 -0.920440  
C -3.017379 -2.076379 -2.108214  
H -1.972529 -2.404230 -2.238179  
H -3.666366 -2.960258 -2.038514  
H -3.310160 -1.485119 -2.997018  
C -2.924070 0.666851 0.341316  
C -4.394387 1.068000 0.175890  
H -5.045681 0.180798 0.195643  
H -4.709448 1.744925 0.984960  
H -4.562363 1.586605 -0.781928  
H -2.321766 1.587467 0.325593  
C -2.700120 -0.036599 1.691804  
H -3.236009 0.567362 2.441694  
H -3.209553 -1.014542 1.675535  
C 3.845474 0.310886 -0.969790  
H 4.545295 -0.534983 -1.019038  
H 3.656374 0.663156 -1.994884  
H 4.349253 1.120113 -0.421167  
H 2.275071 -1.153131 3.115637  
H 1.327523 0.126876 2.381790  
H -1.328073 -2.365010 1.695976  
H -0.625245 0.608567 1.779874  
H -1.241103 -0.073729 3.272135

3-c17,  $\Delta G = 3.6515$  kcal/mol, population = 0.17 %

C 1.268088 -1.767016 -1.681203  
C 0.479652 -2.941852 -1.176936  
C -0.838043 -3.007630 -0.903947  
C -1.441222 -4.284942 -0.372101  
H -2.274801 -4.627571 -1.010691  
H -1.862268 -4.149705 0.638544  
H -0.695081 -5.090780 -0.315492  
C -1.825685 -1.889005 -1.180877  
C -2.718391 -1.425314 -0.007279  
H -3.695911 -1.116900 -0.411396  
H -2.942056 -2.270618 0.659655  
C -2.181611 -0.252031 0.857118  
C -1.985913 0.962639 -0.017291  
C -0.899565 1.754302 -0.037781  
C -1.092330 2.819386 -1.036703  
O -0.354902 3.714928 -1.373116  
O -2.335994 2.658000 -1.580169

C -2.975589 1.512514 -1.006450  
H -3.922704 1.826538 -0.538425  
H -3.212971 0.797766 -1.810650  
C 0.349710 1.491336 0.738198  
H 0.824075 2.442284 1.039342  
C -0.019961 0.632046 1.952606  
H 0.896306 0.318593 2.467260  
H -0.604280 1.246962 2.658382  
C -0.812708 -0.613097 1.521457  
H -0.210913 -1.093547 0.739119  
C -0.933976 -1.609609 2.675117  
H 0.066105 -1.965912 2.967137  
H -1.529912 -2.492779 2.399733  
H -1.395596 -1.155445 3.565905  
O 1.203990 0.790133 -0.167504  
C 2.593885 0.840217 -0.011104  
H 2.957248 1.872021 -0.197638  
O 2.984201 0.452273 1.288725  
C 3.577003 1.451858 2.092661  
H 2.902304 2.311723 2.254534  
H 3.799904 0.995948 3.067588  
H 4.520968 1.823928 1.655807  
C 3.182847 -0.135650 -1.042705  
C 4.708426 -0.151776 -0.934257  
H 5.148269 -0.767403 -1.733717  
H 5.131576 0.862700 -1.017214  
H 5.023036 -0.570728 0.034071  
H 2.906629 0.259489 -2.035661  
C 2.565503 -1.541649 -0.878797  
H 3.307831 -2.301651 -1.176201  
H 2.374473 -1.713340 0.192796  
C -3.255215 0.098168 1.913154  
H -3.497112 -0.784368 2.521790  
H -2.911906 0.898943 2.584535  
H -4.186397 0.434520 1.433231  
H -2.500745 -2.260935 -1.972952  
H -1.308972 -1.021673 -1.616433  
H 1.070036 -3.849680 -0.991563  
H 0.664548 -0.854224 -1.644070  
H 1.539466 -1.923978 -2.743325

3-c7,  $\Delta G = 3.7431$  kcal/mol, population = 0.15 %

C -0.525266 2.962395 0.085830

C 0.708676 3.460811 -0.630827  
C 1.688985 2.684195 -1.130417  
C 2.890657 3.258424 -1.832144  
H 2.854735 4.356987 -1.877991  
H 2.966783 2.869717 -2.863501  
H 3.827062 2.967989 -1.324163  
C 1.626094 1.178719 -1.040693  
C 2.761676 0.501464 -0.238876  
H 3.568070 0.171854 -0.913152  
H 3.221392 1.221209 0.456830  
C 2.268121 -0.709219 0.613857  
C 1.349118 -1.546738 -0.237409  
C 0.035340 -1.751849 -0.025733  
C -0.491882 -2.608785 -1.104755  
O -1.607260 -3.036957 -1.290205  
O 0.536181 -2.889003 -1.957750  
C 1.739521 -2.271271 -1.493118  
H 2.495135 -3.053032 -1.315579  
H 2.123615 -1.596631 -2.275273  
C -0.705561 -1.234146 1.173571  
H -1.497422 -1.944636 1.457127  
C 0.311756 -1.047752 2.295778  
H -0.192898 -0.591578 3.161074  
H 0.680019 -2.037218 2.613810  
C 1.475142 -0.146954 1.851593  
H 1.009566 0.788131 1.510484  
C 2.368954 0.213705 3.039487  
H 1.782393 0.759659 3.794486  
H 3.208013 0.861467 2.742689  
H 2.787093 -0.679826 3.528146  
O -1.300453 0.052844 0.950887  
C -2.348267 0.125021 0.031201  
H -2.035017 -0.305351 -0.942445  
O -3.422599 -0.639888 0.538104  
C -4.283695 -1.188194 -0.438592  
H -4.820744 -0.407258 -1.008462  
H -3.727136 -1.830621 -1.141627  
H -5.029182 -1.799164 0.090325  
C -2.741479 1.597867 -0.175301  
C -3.277932 2.228639 1.111564  
H -2.508989 2.252916 1.896964  
H -3.613803 3.261631 0.929441  
H -4.129479 1.649062 1.495461  
H -3.573608 1.553658 -0.899187

C -1.623463 2.419334 -0.853342  
H -1.156381 1.794626 -1.633230  
H -2.081219 3.268003 -1.389212  
C 3.475490 -1.572368 1.031858  
H 4.225785 -0.966228 1.557270  
H 3.168727 -2.395195 1.695419  
H 3.969248 -2.010931 0.152141  
H 1.621236 0.768915 -2.066548  
H 0.665041 0.889502 -0.605817  
H 0.801449 4.546031 -0.761634  
H -0.943972 3.780984 0.691533  
H -0.256382 2.168599 0.795071

3-c13,  $\Delta G = 3.8535$  kcal/mol, population = 0.12 %

C 0.609894 1.578592 1.869331  
C -0.290267 2.528239 1.118787  
C -1.603868 2.360762 0.881426  
C -2.400410 3.392357 0.124801  
H -2.826693 2.977783 -0.804116  
H -1.781765 4.259127 -0.150690  
H -3.255747 3.751939 0.723975  
C -2.387883 1.187975 1.431385  
C -3.157669 0.284446 0.448710  
H -3.825078 -0.354333 1.050734  
H -3.830292 0.892371 -0.175857  
C -2.338432 -0.645694 -0.489891  
C -1.326926 -1.421266 0.315414  
C -0.018435 -1.558597 0.025859  
C 0.602659 -2.434638 1.038222  
O 1.746062 -2.816761 1.147207  
O -0.362725 -2.799209 1.928287  
C -1.617940 -2.223930 1.551612  
H -2.341679 -3.034609 1.369320  
H -1.994011 -1.614344 2.388002  
C 0.652304 -0.949565 -1.172751  
H 1.370312 -1.670527 -1.591108  
C -0.422186 -0.620731 -2.205080  
H 0.042494 -0.033723 -3.011364  
H -0.787501 -1.558704 -2.654930  
C -1.584673 0.173676 -1.588773  
H -1.127944 1.028389 -1.071441  
C -2.499647 0.717387 -2.687749  
H -2.846269 -0.079032 -3.364899



H -1.954799 1.453863 -3.298243  
H -3.389397 1.221060 -2.281672  
O 1.314805 0.278859 -0.863745  
C 2.563768 0.245127 -0.209874  
H 2.549493 -0.526504 0.581823  
O 3.620643 -0.034723 -1.095740  
C 3.935310 -1.391854 -1.345454  
H 5.027408 -1.478050 -1.461821  
H 3.610496 -2.040832 -0.514671  
H 3.464156 -1.757006 -2.276205  
C 2.817265 1.634511 0.390091  
C 2.566592 2.743396 -0.637237  
H 1.519335 2.764251 -0.963737  
H 2.817228 3.727059 -0.209760  
H 3.194691 2.585831 -1.527097  
H 3.897064 1.636589 0.611954  
C 2.117571 1.840886 1.749954  
H 2.618421 1.183294 2.480857  
H 2.330360 2.872331 2.082463  
C -3.318261 -1.665351 -1.119626  
H -3.763711 -2.312716 -0.350108  
H -4.142546 -1.144434 -1.626873  
H -2.813249 -2.310473 -1.853338  
H -3.148305 1.608991 2.115300  
H -1.737648 0.571015 2.065759  
H 0.173766 3.450935 0.753623  
H 0.393307 0.544486 1.567193  
H 0.362244 1.625381 2.946943

#### Coordinates of the dominating conformers of **4**

4-c3,  $\Delta G = 0.0000$  kcal/mol, population = 44.88 %

O -4.041401 -1.487924 -0.202838  
H -3.291126 -2.045428 -0.482874  
C -3.688733 -0.138404 -0.449973  
H -2.979889 -0.076623 -1.290845  
H -4.598056 0.418287 -0.734943  
C -3.067562 0.517311 0.799766  
C -4.093836 0.573128 1.934555  
H -4.933392 1.239943 1.682482  
H -3.617441 0.940437 2.856063  
H -4.498342 -0.432843 2.122380  
C -2.508457 1.916393 0.504100

C -1.486621 1.951555 -0.648576  
C -0.537481 3.118440 -0.608719  
C 0.719264 3.104018 -0.124918  
C 1.593069 4.330746 -0.153651  
H 2.514724 4.148399 -0.733792  
H 1.919238 4.605853 0.865026  
H 1.076572 5.194479 -0.597893  
C 1.348763 1.867622 0.475260  
H 1.755584 2.130361 1.466603  
C 2.477092 1.252816 -0.385039  
H 3.446205 1.708431 -0.130803  
H 2.307485 1.498515 -1.446009  
C 2.608374 -0.291508 -0.262095  
C 1.325501 -0.916288 -0.754539  
C 0.581001 -1.815796 -0.083845  
C -0.643053 -2.067656 -0.852771  
O -1.608098 -2.753943 -0.566038  
O -0.586900 -1.360294 -2.007421  
C 0.639920 -0.615477 -2.057059  
H 0.395376 0.447720 -2.194522  
H 1.219743 -0.950783 -2.932031  
C 0.934998 -2.408343 1.237714  
C 2.425293 -2.169372 1.502416  
H 2.668506 -2.426259 2.545065  
H 3.025210 -2.841684 0.864701  
C 2.821702 -0.707281 1.234240  
C 4.231431 -0.411817 1.748970  
H 4.977934 -1.087330 1.303177  
H 4.271828 -0.550615 2.840431  
H 4.541354 0.622450 1.535230  
H 2.122385 -0.094367 1.825126  
H 0.685788 -3.481686 1.251606  
H 0.318211 -1.937781 2.024384  
C 3.765220 -0.763495 -1.168692  
H 3.924867 -1.848727 -1.084030  
H 4.701704 -0.253261 -0.903178  
H 3.553202 -0.535205 -2.224082  
H 0.573879 1.112201 0.663059  
H -0.920394 4.068059 -1.003725  
H -0.928686 1.010045 -0.608873  
H -2.018764 1.959329 -1.614127  
H -2.019742 2.264179 1.429067  
H -3.342792 2.609887 0.310108  
O -1.951805 -0.282355 1.219188

H -2.248643 -1.205174 1.193911

4-c2,  $\Delta G = 0.5968$  kcal/mol, population = 16.37 %

O 4.005002 1.639378 -0.064377  
H 3.260208 2.242529 -0.253381  
C 3.676125 0.372795 -0.607737  
H 2.999036 0.484289 -1.469936  
H 4.602721 -0.109620 -0.962338  
C 3.004701 -0.530968 0.450045  
C 4.032071 -0.964962 1.499638  
H 3.541433 -1.479945 2.337846  
H 4.553146 -0.078867 1.894635  
H 4.785162 -1.640362 1.063582  
C 2.314716 -1.711534 -0.238820  
C 1.570447 -2.654745 0.725318  
C 0.524966 -3.510320 0.055899  
C -0.770730 -3.184166 -0.113074  
C -1.744891 -4.146910 -0.741813  
H -2.184906 -3.742104 -1.668631  
H -2.591459 -4.346612 -0.060670  
H -1.265317 -5.106521 -0.984182  
C -1.337235 -1.863529 0.370883  
H -1.812100 -2.029878 1.355324  
C -2.368451 -1.214298 -0.568700  
H -3.351134 -1.695284 -0.449305  
H -2.083885 -1.394139 -1.618442  
C -2.534916 0.318497 -0.379775  
C -1.227764 0.987184 -0.728375  
C -0.605607 1.930366 0.003210  
C 0.676680 2.240767 -0.639540  
O 1.573105 2.977630 -0.270207  
O 0.768114 1.531426 -1.792297  
C -0.384193 0.690490 -1.933196  
H -0.046922 -0.356815 -1.975409  
H -0.884156 0.928525 -2.885513  
C -1.115577 2.500739 1.282772  
C -2.601940 2.155218 1.429402  
H -2.937665 2.369838 2.455780  
H -3.198449 2.803396 0.764447  
C -2.885077 0.677106 1.103564  
C -4.309273 0.285665 1.500296  
H -4.535469 -0.761941 1.249204  
H -5.059209 0.921351 1.004477

H -4.444888 0.402725 2.586596

H -2.194956 0.091544 1.732327  
H -0.948664 3.589712 1.310086  
H -0.533010 2.080650 2.122704  
C -3.613351 0.816946 -1.367066  
H -3.802036 1.893822 -1.247353  
H -4.559681 0.278524 -1.215577  
H -3.299433 0.644164 -2.407497  
H -0.517332 -1.153674 0.551327  
H 0.858597 -4.484852 -0.321790  
H 2.298516 -3.307793 1.232939  
H 1.109266 -2.039192 1.510419  
H 3.053110 -2.272007 -0.836229  
H 1.591076 -1.288903 -0.952417  
O 1.968413 0.226974 1.088337  
H 2.363859 1.086191 1.304376

4-c5,  $\Delta G = 0.9570$  kcal/mol, population = 8.91 %

O 3.415914 1.687249 -0.305791  
H 2.782705 1.543106 -1.040525  
C 4.117013 0.492984 -0.009946  
H 4.385541 -0.068153 -0.922273  
H 5.052173 0.788798 0.493283  
C 3.296487 -0.404030 0.948983  
C 4.213703 -1.382470 1.675076  
H 3.641920 -2.019276 2.366492  
H 4.963707 -0.831929 2.262934  
H 4.735529 -2.036285 0.959067  
C 2.201071 -1.134214 0.147194  
C 1.097910 -1.814269 0.963838  
C 0.165995 -2.600112 0.083250  
C -1.178243 -2.660863 0.098435  
C -1.904278 -3.598756 -0.836671  
H -2.682492 -3.086174 -1.427058  
H -2.429183 -4.384247 -0.264274  
H -1.214601 -4.087982 -1.539478  
C -2.061620 -1.920055 1.079133  
H -2.645334 -2.684645 1.622610  
C -3.083055 -0.930034 0.481305  
H -3.915405 -0.827540 1.193177  
H -3.537371 -1.364812 -0.423391  
C -2.607289 0.512535 0.144530  
C -1.511353 0.502248 -0.893433

C -0.356127 1.192610 -0.815913  
C 0.424015 0.926925 -2.031937  
O 1.543880 1.302142 -2.335721  
O -0.295557 0.121477 -2.844753  
C -1.548163 -0.198926 -2.220585  
H -1.620056 -1.291422 -2.140070  
H -2.365205 0.158162 -2.867558  
C 0.035045 2.091484 0.308601  
C -1.220103 2.473517 1.095049  
H -0.936509 2.979162 2.030953  
H -1.817987 3.198037 0.515611  
C -2.075613 1.239499 1.428353  
C -3.174387 1.598267 2.431002  
H -2.722434 1.933560 3.377140  
H -3.827084 0.743598 2.663048  
H -3.809491 2.418721 2.062521  
H -1.396828 0.528135 1.926488  
H 0.563589 2.976502 -0.078972  
H 0.745655 1.567002 0.966618  
C -3.815781 1.262416 -0.466664  
H -4.130952 0.794138 -1.410686  
H -3.571449 2.313838 -0.676583  
H -4.676608 1.234693 0.215953  
H -1.453571 -1.419882 1.843891  
H 0.678078 -3.233399 -0.653718  
H 1.561218 -2.508031 1.690034  
H 0.565891 -1.059946 1.560130  
H 2.691300 -1.877581 -0.504901  
H 1.732578 -0.407688 -0.526183  
O 2.714654 0.462045 1.927505  
H 2.640657 1.318412 1.468516

4-c1,  $\Delta G = 1.0053$  kcal/mol, population = 8.21 %

O 4.178613 0.473606 -1.339753  
H 3.416805 1.070901 -1.447437  
C 4.482597 0.318320 0.029362  
H 5.233342 -0.486495 0.090989  
H 4.942263 1.233662 0.454414  
C 3.286214 -0.044666 0.937524  
C 3.816946 -0.456310 2.308627  
H 2.985998 -0.568083 3.019922  
H 4.494083 0.317460 2.703337  
H 4.363669 -1.409419 2.255370

C 2.455620 -1.161508 0.278330  
C 1.181393 -1.578070 1.019808  
C 0.404175 -2.597368 0.229991  
C -0.928317 -2.770923 0.158438  
C -1.509966 -3.872877 -0.693396  
H -2.180966 -3.478860 -1.476385  
H -2.122287 -4.559768 -0.082664  
H -0.723783 -4.458713 -1.191068  
C -1.931487 -1.967966 0.959581  
H -2.459388 -2.685851 1.611888  
C -3.005355 -1.200520 0.152792  
H -3.966977 -1.268479 0.681610  
H -3.177501 -1.698346 -0.814300  
C -2.750937 0.310594 -0.113493  
C -1.441420 0.509823 -0.833942  
C -0.487916 1.398206 -0.486908  
C 0.621343 1.269570 -1.434214  
O 1.701304 1.846851 -1.431644  
O 0.310888 0.343571 -2.361064  
C -0.991111 -0.200714 -2.076978  
H -0.879509 -1.284507 -1.937741  
H -1.644551 -0.013925 -2.943261  
C -0.566388 2.353531 0.655582  
C -2.027331 2.481339 1.092707  
H -2.087077 3.015968 2.053069  
H -2.579264 3.093795 0.358813  
C -2.711379 1.110325 1.236061  
C -4.084221 1.264567 1.895058  
H -4.728008 1.959186 1.333571  
H -3.967780 1.672994 2.910670  
H -4.617771 0.306595 1.984936  
H -2.080448 0.524335 1.925043  
H -0.145683 3.327770 0.358397  
H 0.068226 1.987553 1.481051  
C -3.880216 0.820236 -1.039698  
H -3.804755 1.904619 -1.207050  
H -4.865712 0.603300 -0.604323  
H -3.837781 0.322947 -2.019929  
H -1.409746 -1.284290 1.641673  
H 1.024175 -3.291311 -0.352948  
H 1.450965 -2.003959 2.004189  
H 0.573980 -0.686235 1.229583  
H 3.107183 -2.042788 0.145729  
H 2.193698 -0.841919 -0.740988

O 2.486684 1.121380 1.173842  
H 2.266114 1.532484 0.320354

4-c6,  $\Delta G = 1.4019$  kcal/mol, population = 4.20 %

O -3.253973 1.001175 1.689455  
H -2.393385 1.428203 1.527090  
C -3.927292 0.872113 0.463070  
H -4.906819 0.411789 0.673708  
H -4.129825 1.862547 0.002514  
C -3.187724 0.014265 -0.581072  
C -4.056935 -0.125236 -1.831839  
H -3.504119 -0.637451 -2.631726  
H -4.356041 0.866963 -2.209097  
H -4.972886 -0.697891 -1.619123  
C -2.793385 -1.340789 0.018880  
C -2.018638 -2.257837 -0.946478  
C -1.186069 -3.301811 -0.250980  
C 0.130257 -3.220288 0.020937  
C 0.861406 -4.358147 0.686892  
H 1.274335 -4.063545 1.666498  
H 1.721787 -4.683300 0.074767  
H 0.203393 -5.225465 0.843166  
C 0.967030 -2.016025 -0.360195  
H 1.543324 -2.266458 -1.269543  
C 1.945844 -1.548242 0.728246  
H 2.809020 -2.228678 0.782799  
H 1.460307 -1.614580 1.716342  
C 2.467050 -0.096836 0.551261  
C 1.308628 0.861131 0.686320  
C 1.057919 1.910666 -0.117117  
C -0.179340 2.565957 0.332871  
O -0.794653 3.492800 -0.136527  
O -0.603266 1.925127 1.472560  
C 0.241409 0.797999 1.737963  
H -0.366182 -0.117620 1.665888  
H 0.630900 0.877410 2.764897  
C 1.888900 2.315294 -1.288542  
C 3.249099 1.611521 -1.211826  
H 3.775926 1.708106 -2.173828  
H 3.881673 2.112634 -0.459313  
C 3.108048 0.119311 -0.860046  
C 4.433915 -0.620735 -1.043442  
H 4.752206 -0.571864 -2.096314

H 4.355782 -1.684076 -0.770131  
H 5.236492 -0.174128 -0.436205  
H 2.393235 -0.296642 -1.588729  
H 2.001738 3.411316 -1.315724  
H 1.362209 2.040856 -2.220748  
C 3.467636 0.195544 1.692516  
H 3.899048 1.203102 1.604906  
H 4.287859 -0.536290 1.686869  
H 2.971541 0.126198 2.672276  
H 0.311032 -1.178451 -0.635793  
H -1.714502 -4.210021 0.066030  
H -2.729283 -2.760648 -1.623470  
H -1.382518 -1.627168 -1.581446  
H -3.700190 -1.845424 0.390683  
H -2.177109 -1.128695 0.904306  
O -1.947266 0.658177 -0.918315  
H -2.142410 1.522105 -1.309545

4-c4,  $\Delta G = 1.5117$  kcal/mol, population = 3.49 %

O -5.407222 0.987080 -0.139451  
H -4.745416 1.692980 -0.242404  
C -4.645320 -0.158300 0.173148  
H -4.382011 -0.183712 1.251238  
H -5.257313 -1.050005 -0.039320  
C -3.337183 -0.188728 -0.643940  
C -3.644760 -0.330672 -2.132558  
H -4.043964 -1.332100 -2.353609  
H -2.739307 -0.170837 -2.734850  
H -4.395456 0.416485 -2.426867  
C -2.428718 -1.308540 -0.117684  
C -1.100660 -1.494515 -0.859689  
C -0.207187 -2.494326 -0.170351  
C 1.124867 -2.637343 -0.295639  
C 1.850119 -3.736277 0.441801  
H 2.362186 -4.410717 -0.267035  
H 1.162349 -4.336203 1.055049  
H 2.637384 -3.342635 1.108085  
C 1.977363 -1.798486 -1.224841  
H 2.432219 -2.495208 -1.951573  
C 3.132681 -1.001344 -0.578010  
H 3.953029 -0.918322 -1.306151  
H 3.554625 -1.572774 0.263686  
C 2.820839 0.444350 -0.090258

C 1.656847 0.429793 0.867501  
C 0.546188 1.185645 0.759687  
C -0.374095 0.805684 1.839286  
O -1.519684 1.168906 2.043281  
O 0.231809 -0.111073 2.628528  
C 1.541638 -0.397870 2.115418  
H 1.609729 -1.478758 1.941948  
H 2.287089 -0.114376 2.875923  
C 0.315995 2.241528 -0.269250  
C 1.658426 2.607376 -0.905612  
H 1.495150 3.237914 -1.793287  
H 2.251458 3.211622 -0.197064  
C 2.459250 1.359407 -1.313246  
C 3.670859 1.751406 -2.162397  
H 4.311864 2.480502 -1.643155  
H 3.335167 2.219458 -3.100549  
H 4.293671 0.885038 -2.431204  
H 1.788359 0.765066 -1.955487  
H -0.160346 3.116962 0.202031  
H -0.405364 1.883399 -1.022549  
C 4.063679 0.967110 0.665279  
H 3.937694 2.017335 0.967507  
H 4.962782 0.891426 0.037937  
H 4.247290 0.374037 1.573469  
H 1.343619 -1.127793 -1.820338  
H -0.723467 -3.202474 0.490537  
H -1.304381 -1.831837 -1.892024  
H -0.596049 -0.522794 -0.957474  
H -2.995648 -2.255389 -0.147380  
H -2.225753 -1.114744 0.948472  
O -2.728983 1.102299 -0.487911  
H -2.403341 1.192275 0.431761

4-c12,  $\Delta G = 1.8875$  kcal/mol, population = 1.85 %

O -3.287537 0.674667 1.505146  
H -2.419197 1.103281 1.421448  
C -3.930679 0.682530 0.254069  
H -4.899034 0.172430 0.384543  
H -4.158224 1.720452 -0.069748  
C -3.162422 0.000802 -0.895287  
C -3.972398 0.154518 -2.186256  
H -4.944908 -0.356773 -2.114206  
H -3.414820 -0.275063 -3.031595

H -4.162310 1.218168 -2.404348  
C -2.853916 -1.486456 -0.652306  
C -1.971168 -1.791113 0.575337  
C -1.177196 -3.063964 0.459247  
C 0.100689 -3.160588 0.045398  
C 0.814731 -4.486160 -0.014724  
H 1.706066 -4.490372 0.636999  
H 1.179501 -4.692917 -1.036511  
H 0.164062 -5.317104 0.295797  
C 0.912638 -1.958387 -0.385546  
H 1.370013 -2.185130 -1.363479  
C 2.023810 -1.565188 0.609662  
H 2.882985 -2.246438 0.512034  
H 1.654130 -1.704099 1.639086  
C 2.534195 -0.102592 0.470216  
C 1.377315 0.832402 0.729512  
C 0.984363 1.838929 -0.072664  
C -0.255867 2.414017 0.463850  
O -0.984299 3.267839 0.012137  
O -0.549956 1.771836 1.639510  
C 0.448911 0.775596 1.909285  
H -0.051259 -0.195050 2.033236  
H 0.950998 1.025887 2.857777  
C 1.675839 2.257363 -1.325750  
C 3.085728 1.658589 -1.336317  
H 3.543870 1.790666 -2.328801  
H 3.723719 2.205237 -0.620288  
C 3.068660 0.161891 -0.979943  
C 4.426247 -0.488013 -1.252361  
H 5.237107 0.018329 -0.706004  
H 4.665058 -0.428529 -2.325475  
H 4.440386 -1.551350 -0.968354  
H 2.340224 -0.300546 -1.665249  
H 1.700061 3.356953 -1.395834  
H 1.097305 1.907540 -2.200032  
C 3.618074 0.143156 1.541812  
H 4.432279 -0.589032 1.447609  
H 3.197842 0.040062 2.553636  
H 4.046876 1.152547 1.455746  
H 0.251645 -1.096928 -0.555439  
H -1.698183 -3.992348 0.726706  
H -1.294551 -0.942516 0.704141  
H -2.594437 -1.816747 1.480674  
H -2.331832 -1.843813 -1.555054

H -3.803498 -2.043312 -0.599501  
O -1.887128 0.639201 -1.053936  
H -2.023808 1.587473 -1.200343

4-c11,  $\Delta G = 1.8913$  kcal/mol, population = 1.84 %

O -2.786727 1.395696 -1.004897  
H -2.270312 2.197369 -0.789944  
C -3.303339 0.867286 0.199433  
H -2.565962 0.921677 1.019459  
H -4.202210 1.426890 0.524890  
C -3.703223 -0.590435 -0.058452  
C -4.536669 -1.124088 1.101659  
H -5.461993 -0.536828 1.198917  
H -3.988664 -1.068916 2.053569  
H -4.812251 -2.174649 0.921543  
C -2.479865 -1.484330 -0.351016  
C -1.436038 -1.616624 0.764451  
C -0.383424 -2.644348 0.441025  
C 0.917502 -2.641251 0.785820  
C 1.817178 -3.785915 0.392406  
H 1.256518 -4.582942 -0.117102  
H 2.312836 -4.221388 1.277896  
H 2.622904 -3.458903 -0.284314  
C 1.548791 -1.572764 1.653047  
H 0.800835 -0.811784 1.913757  
C 2.831976 -0.887368 1.143367  
H 3.563432 -1.643652 0.820349  
H 3.301632 -0.386352 2.005734  
C 2.690664 0.169617 0.011881  
C 1.661241 1.196364 0.413660  
C 0.641131 1.629317 -0.353197  
C -0.116250 2.632569 0.410960  
O -1.118837 3.252586 0.102947  
O 0.476970 2.803304 1.615455  
C 1.618444 1.940435 1.717987  
H 1.483064 1.288714 2.594812  
H 2.514595 2.558438 1.887257  
C 0.373631 1.192090 -1.754219  
C 1.632918 0.529371 -2.317232  
H 1.396939 0.020678 -3.264919  
H 2.381176 1.304842 -2.557388  
C 2.243757 -0.489367 -1.338758  
C 3.360486 -1.278272 -2.027210

H 3.892820 -1.947203 -1.335190  
H 4.106813 -0.609446 -2.483658  
H 2.940553 -1.901362 -2.831815  
H 1.439552 -1.194659 -1.081754  
H 0.065914 2.057820 -2.362957  
H -0.484291 0.500800 -1.766266  
C 4.051670 0.889857 -0.135549  
H 4.038780 1.605227 -0.970809  
H 4.856818 0.163101 -0.313409  
H 4.306524 1.443986 0.779930  
H 1.816638 -2.060500 2.608627  
H -0.746777 -3.509425 -0.128780  
H -0.972999 -0.638577 0.965014  
H -1.943877 -1.909829 1.702239  
H -1.991414 -1.100414 -1.261517  
H -2.872784 -2.482091 -0.609139  
O -4.548096 -0.607096 -1.213346  
H -4.116455 -0.012968 -1.848068

4-c13,  $\Delta G = 1.8951$  kcal/mol, population = 1.83 %

O 3.285141 -0.651257 1.499436  
H 2.421460 -1.088203 1.410774  
C 3.933436 -0.648538 0.251015  
H 4.896041 -0.129110 0.387133  
H 4.172802 -1.683041 -0.075212  
C 3.163129 0.029198 -0.899341  
C 3.980074 -0.112036 -2.187357  
H 4.947138 0.408654 -2.109453  
H 3.421818 0.314852 -3.033622  
H 4.181469 -1.173006 -2.408208  
C 2.838558 1.512444 -0.652811  
C 1.947851 1.804163 0.572245  
C 1.141325 3.069200 0.456854  
C -0.135659 3.154098 0.037682  
C -0.863010 4.472474 -0.021114  
H -0.222074 5.309046 0.294524  
H -1.756848 4.465531 0.627161  
H -1.225925 4.678688 -1.043672  
C -0.933372 1.945071 -0.400690  
H -1.388582 2.170195 -1.380009  
C -2.044995 1.537538 0.588240  
H -2.910568 2.210392 0.488884  
H -1.681339 1.676891 1.619748

C -2.539906 0.070314 0.441870  
C -1.374711 -0.853680 0.703331  
C -0.967972 -1.853548 -0.100294  
C 0.275771 -2.417560 0.439800  
O 1.014927 -3.262388 -0.011416  
O 0.558137 -1.776190 1.618778  
C -0.452101 -0.791156 1.887359  
H 0.037509 0.184163 2.016685  
H -0.955784 -1.049717 2.832786  
C -1.649643 -2.275001 -1.357743  
C -3.065491 -1.690537 -1.372697  
H -3.517880 -1.824082 -2.367622  
H -3.701035 -2.245935 -0.661235  
C -3.065238 -0.194905 -1.011479  
C -4.428144 0.442059 -1.287884  
H -5.236230 -0.074272 -0.746777  
H -4.661558 0.383632 -2.362250  
H -4.454356 1.504276 -1.000544  
H -2.338517 0.277140 -1.692046  
H -1.662407 -3.374555 -1.431373  
H -1.070846 -1.916559 -2.228353  
C -3.625949 -0.189852 1.507859  
H -4.447143 0.534321 1.412314  
H -3.211246 -0.085685 2.521858  
H -4.044067 -1.203281 1.416740  
H -0.262925 1.090875 -0.570187  
H 1.651550 4.001980 0.729724  
H 1.279499 0.948259 0.695787  
H 2.567251 1.833417 1.480120  
H 2.316458 1.867391 -1.556500  
H 3.782184 2.078781 -0.594400  
O 1.895061 -0.621481 -1.065560  
H 2.041879 -1.567936 -1.213924

4-c9,  $\Delta G = 2.0419$  kcal/mol, population = 1.42 %

O -5.426709 0.508359 -0.227164  
H -5.859159 0.592060 0.633248  
C -4.516411 -0.571457 -0.160130  
H -5.000291 -1.499855 0.199037  
H -4.170486 -0.756210 -1.190857  
C -3.276304 -0.311179 0.723660  
C -3.696950 -0.099142 2.176251  
H -4.292450 -0.956850 2.526379

H -4.294960 0.818113 2.288255  
H -2.815911 -0.011457 2.827767  
C -2.500468 0.893353 0.161692  
C -1.245744 1.313654 0.933914  
C -0.495944 2.402286 0.210618  
C 0.816400 2.693921 0.262249  
C 1.372151 3.854510 -0.526943  
H 1.861486 4.585295 0.140892  
H 0.585388 4.373891 -1.092757  
H 2.145988 3.534121 -1.246248  
C 1.809377 1.973020 1.148973  
H 2.221516 2.730733 1.839271  
C 3.009392 1.299573 0.446260  
H 3.881617 1.348925 1.114341  
H 3.298075 1.882004 -0.442846  
C 2.852755 -0.191524 0.029201  
C 1.646074 -0.368622 -0.856656  
C 0.672105 -1.282483 -0.676618  
C -0.335382 -1.095848 -1.729060  
O -1.403913 -1.659932 -1.885502  
O 0.078246 -0.110547 -2.559994  
C 1.343090 0.399706 -2.111236  
H 1.238670 1.480565 -1.952813  
H 2.092432 0.228262 -2.900856  
C 0.647736 -2.321256 0.394004  
C 2.055357 -2.462649 0.976407  
H 2.024691 -3.073040 1.892283  
H 2.698903 -3.003614 0.261131  
C 2.683843 -1.097089 1.301213  
C 3.977222 -1.277654 2.099613  
H 4.695881 -1.920114 1.567634  
H 3.757177 -1.760278 3.064361  
H 4.474786 -0.320517 2.315772  
H 1.963980 -0.578727 1.956201  
H 0.285033 -3.274652 -0.024045  
H -0.084832 -2.038207 1.168496  
C 4.106767 -0.586457 -0.783977  
H 4.093778 -1.654143 -1.048401  
H 5.022495 -0.381600 -0.211816  
H 4.166467 -0.007498 -1.717530  
H 1.290284 1.248163 1.789952  
H -1.120851 3.045190 -0.423123  
H -1.538204 1.674730 1.937096  
H -0.604439 0.436405 1.102963

H -3.199987 1.742477 0.098311  
H -2.222026 0.661851 -0.879765  
O -2.490045 -1.500524 0.708564  
H -2.206810 -1.675706 -0.209811

4-c31,  $\Delta G = 2.2477$  kcal/mol, population = 1.01 %

O 5.080067 -0.797781 1.028595  
H 4.494410 -0.235609 1.563935  
C 4.196684 -1.606189 0.285310  
H 4.766871 -2.083631 -0.527113  
H 3.764514 -2.412417 0.911817  
C 3.036869 -0.778640 -0.297038  
C 1.986046 -1.711969 -0.895828  
H 2.411395 -2.288398 -1.732038  
H 1.119821 -1.151515 -1.277273  
H 1.619694 -2.415319 -0.136090  
C 3.576495 0.226811 -1.329160  
C 2.568149 1.282372 -1.818633  
C 2.298546 2.378599 -0.820271  
C 1.137492 2.699967 -0.212657  
C 1.063650 3.899847 0.697738  
H 2.017843 4.444765 0.724265  
H 0.802462 3.615524 1.730017  
H 0.276649 4.595756 0.358270  
C -0.156038 1.941647 -0.434554  
H -0.731027 2.476914 -1.210859  
C -1.026856 1.800494 0.820558  
H -1.434761 2.783312 1.098915  
H -0.398261 1.493575 1.673027  
C -2.205424 0.797871 0.711400  
C -1.678434 -0.614786 0.621826  
C -2.139507 -1.566993 -0.210786  
C -1.415488 -2.822696 0.060744  
O -1.519682 -3.907535 -0.462505  
O -0.533421 -2.589777 1.077908  
C -0.613034 -1.218646 1.491156  
H 0.379745 -0.757232 1.357835  
H -0.869892 -1.187386 2.562702  
C -3.234394 -1.387532 -1.209312  
C -4.016379 -0.110503 -0.881493  
H -4.662328 0.163070 -1.730250  
H -4.688675 -0.298394 -0.027150  
C -3.082817 1.069255 -0.556875

C -3.859163 2.385386 -0.487758  
H -4.664709 2.342677 0.261572  
H -4.326375 2.600604 -1.461188  
H -3.210087 3.238049 -0.236563  
H -2.382754 1.142437 -1.405636  
H -3.889859 -2.273547 -1.213327  
H -2.802612 -1.326045 -2.224805  
C -3.031112 0.906785 2.015004  
H -3.896476 0.228871 2.003774  
H -3.394941 1.933923 2.159874  
H -2.414187 0.649784 2.888977  
H 0.053376 0.945658 -0.850684  
H 3.171047 3.003489 -0.590297  
H 2.994664 1.754779 -2.720474  
H 1.637182 0.798793 -2.148158  
H 3.944695 -0.350742 -2.191755  
H 4.452515 0.729218 -0.887894  
O 2.489111 -0.092936 0.849595  
H 2.276287 0.825305 0.605246

4-c32,  $\Delta G = 2.3657$  kcal/mol, population = 0.82 %

O -3.136491 2.195917 -1.016252  
H -2.769408 1.485069 -1.568685  
C -4.339406 1.658542 -0.508074  
H -4.676926 2.295801 0.323474  
H -5.131197 1.665594 -1.283054  
C -4.147758 0.208519 -0.027194  
C -5.505908 -0.441862 0.234427  
H -6.040049 0.069804 1.050923  
H -5.390996 -1.499955 0.512399  
H -6.127127 -0.397808 -0.672717  
C -3.240355 0.182217 1.216606  
C -2.934017 -1.201082 1.825914  
C -2.370001 -2.245273 0.884368  
C -1.141529 -2.252122 0.327579  
C -0.697020 -3.376380 -0.571563  
H -0.393365 -3.004321 -1.565007  
H -1.489442 -4.124478 -0.717281  
H 0.185751 -3.884227 -0.145320  
C -0.128310 -1.154364 0.555797  
H -0.386869 -0.581186 1.456298  
C 0.002141 -0.203426 -0.647762  
H -0.935132 0.356619 -0.766331



H 0.100708 -0.796355 -1.571594  
C 1.187338 0.795963 -0.595089  
C 2.480772 0.024213 -0.502824  
C 3.490723 0.281776 0.347615  
C 4.568867 -0.698173 0.112856  
O 5.640307 -0.818136 0.658600  
O 4.172384 -1.529462 -0.896445  
C 2.870444 -1.151749 -1.354583  
H 2.192169 -2.012717 -1.242242  
H 2.926537 -0.903290 -2.427122  
C 3.514747 1.391426 1.344079  
C 2.427653 2.410794 0.988472  
H 2.280443 3.111988 1.824686  
H 2.761586 3.018132 0.129445  
C 1.082518 1.743034 0.648463  
C -0.020986 2.796401 0.520030  
H -0.980468 2.382137 0.179414  
H 0.265500 3.588391 -0.190025  
H -0.192524 3.279768 1.494609  
H 0.833017 1.098500 1.507659  
H 4.513662 1.856574 1.367746  
H 3.347176 0.982637 2.357134  
C 1.189617 1.593073 -1.919249  
H 1.976592 2.361146 -1.925207  
H 0.220301 2.087348 -2.075367  
H 1.362560 0.926565 -2.777329  
H 0.851983 -1.619278 0.759669  
H -3.029054 -3.090283 0.652229  
H -2.231723 -1.039001 2.661774  
H -3.850181 -1.605613 2.281728  
H -3.717498 0.799620 1.995102  
H -2.301583 0.691226 0.958282  
O -3.507387 -0.426736 -1.147203  
H -2.998795 -1.187018 -0.818287

4-c21,  $\Delta G = 2.3745$  kcal/mol, population = 0.81 %

O 2.527810 1.538240 0.995094  
H 1.994548 2.341258 0.861925  
C 3.380629 1.373667 -0.124696  
H 2.821616 1.461943 -1.070524  
H 4.173895 2.146118 -0.120411  
C 4.043438 -0.008876 -0.030440  
C 5.249264 -0.053692 -0.966530

H 4.937325 0.069518 -2.015132  
H 5.765216 -1.021107 -0.871806  
H 5.962738 0.744875 -0.713881  
C 3.078355 -1.164667 -0.392430  
C 1.958125 -1.466057 0.612745  
C 1.233735 -2.741221 0.276773  
C -0.089427 -2.990190 0.269160  
C -0.620814 -4.356820 -0.084719  
H -1.270398 -4.319605 -0.976218  
H -1.243382 -4.760158 0.733860  
H 0.190399 -5.071704 -0.286436  
C -1.136939 -1.961198 0.621568  
H -1.676624 -2.301564 1.522817  
C -2.155894 -1.697678 -0.506622  
H -2.979711 -2.425573 -0.460594  
H -1.673912 -1.863002 -1.484344  
C -2.753171 -0.265288 -0.507584  
C -1.614271 0.711642 -0.659426  
C -1.408640 1.806204 0.098165  
C -0.127024 2.406683 -0.297500  
O 0.486156 3.332165 0.198384  
O 0.370385 1.706444 -1.351157  
C -0.486990 0.596745 -1.643873  
H 0.095101 -0.330731 -1.527526  
H -0.817470 0.666064 -2.692464  
C -2.309603 2.277398 1.190108  
C -3.657221 1.555195 1.076572  
H -4.245932 1.714950 1.993012  
H -4.242290 1.994165 0.250136  
C -3.484834 0.043693 0.841461  
C -4.817756 -0.692248 0.990261  
H -5.582507 -0.290755 0.307259  
H -5.200111 -0.577776 2.016321  
H -4.720637 -1.770497 0.791939  
H -2.818297 -0.315932 1.643015  
H -2.431687 3.371440 1.136828  
H -1.839500 2.071712 2.168762  
C -3.691809 -0.125600 -1.725490  
H -4.470193 -0.901503 -1.706369  
H -3.131205 -0.243596 -2.664987  
H -4.181594 0.858727 -1.747560  
H -0.648417 -1.018941 0.905224  
H 1.895150 -3.579440 0.017821  
H 2.430884 -1.573625 1.606328

H 1.279177 -0.607745 0.695721  
H 3.692394 -2.075785 -0.499817  
H 2.647528 -0.967218 -1.389303  
O 4.535725 -0.173590 1.300928  
H 3.881816 0.263209 1.870257

4-c24,  $\Delta G = 2.4730$  kcal/mol, population = 0.69 %

O -3.198685 1.175446 1.903539  
H -2.639080 1.854749 1.498146  
C -4.216884 0.808695 0.990379  
H -4.894978 0.129440 1.531169  
H -4.804725 1.690149 0.671238  
C -3.682524 0.104010 -0.271633  
C -4.842105 -0.201049 -1.214326  
H -5.575857 -0.866282 -0.735461  
H -4.477837 -0.688392 -2.130696  
H -5.348103 0.731779 -1.506631  
C -2.917719 -1.174735 0.133305  
C -2.012509 -1.757247 -0.962031  
C -1.275468 -2.985179 -0.506115  
C 0.048556 -3.146078 -0.320190  
C 0.609497 -4.459924 0.163634  
H 1.378483 -4.839361 -0.532490  
H -0.173238 -5.225754 0.266247  
H 1.106868 -4.349572 1.142673  
C 1.071431 -2.059908 -0.562523  
H 1.790082 -2.412527 -1.322766  
C 1.842817 -1.658497 0.709801  
H 2.624644 -2.400592 0.929620  
H 1.158875 -1.692461 1.574330  
C 2.494608 -0.250772 0.669628  
C 1.408170 0.782631 0.498466  
C 1.447242 1.829633 -0.347256  
C 0.176513 2.563669 -0.260163  
O -0.218002 3.537917 -0.845819  
O -0.619509 1.910307 0.669450  
C 0.100412 0.801070 1.232244  
H -0.491491 -0.112850 1.088977  
H 0.214080 0.965344 2.315499  
C 2.587601 2.168202 -1.248542  
C 3.823616 1.362649 -0.832632  
H 4.582225 1.405914 -1.629170  
H 4.282708 1.823703 0.058407

C 3.484639 -0.109280 -0.533996  
C 4.756229 -0.944999 -0.377167  
H 5.409640 -0.547618 0.415065  
H 5.332806 -0.934103 -1.314961  
H 4.535292 -1.995997 -0.137016  
H 2.947299 -0.487204 -1.420024  
H 2.783927 3.252353 -1.219712  
H 2.307413 1.939059 -2.292505  
C 3.191795 -0.006892 2.026700  
H 3.927217 -0.797964 2.231208  
H 2.459581 -0.017193 2.848027  
H 3.708431 0.963302 2.048655  
H 0.586315 -1.173906 -0.995251  
H -1.917485 -3.847802 -0.282549  
H -2.630766 -2.015817 -1.840015  
H -1.323641 -0.971217 -1.300258  
H -3.647428 -1.931881 0.466429  
H -2.306857 -0.940857 1.019532  
O -2.831744 1.012600 -0.977287  
H -2.101848 1.275532 -0.393913

4-c10,  $\Delta G = 2.4893$  kcal/mol, population = 0.67 %

O -4.401434 1.229912 -1.454029  
H -3.650283 0.830576 -1.924609  
C -4.534201 0.458383 -0.280949  
H -5.165244 1.017843 0.428202  
H -5.042583 -0.506286 -0.488739  
C -3.160030 0.156246 0.345625  
C -3.292588 -0.864529 1.469979  
H -3.914322 -0.461327 2.284277  
H -2.310825 -1.135768 1.880502  
H -3.768684 -1.788599 1.103967  
C -2.477162 1.455305 0.795537  
C -1.070419 1.245221 1.389988  
C -0.150305 2.426723 1.227529  
C 0.607250 2.680107 0.143426  
C 1.513118 3.882657 0.085878  
H 1.277102 4.515772 -0.787560  
H 2.570021 3.585986 -0.023464  
H 1.430133 4.497865 0.993766  
C 0.557875 1.825536 -1.107283  
H -0.239662 1.076866 -1.020852  
C 1.860086 1.144404 -1.576315

H 2.679852 1.878343 -1.613754  
H 1.705742 0.833040 -2.622794  
C 2.360300 -0.102219 -0.792287  
C 1.245577 -1.114024 -0.676586  
C 0.882130 -1.754251 0.450386  
C -0.252354 -2.641300 0.146582  
O -0.901396 -3.352233 0.878407  
O -0.523164 -2.543869 -1.190517  
C 0.366186 -1.595588 -1.796324  
H -0.237254 -0.793043 -2.245068  
H 0.929786 -2.100630 -2.597027  
C 1.527519 -1.586431 1.783971  
C 2.898526 -0.930461 1.595706  
H 3.298770 -0.608958 2.569981  
H 3.609167 -1.675954 1.198298  
C 2.840206 0.282325 0.650016  
C 4.174100 1.033231 0.667811  
H 4.199564 1.862616 -0.054601  
H 5.020402 0.365997 0.440817  
H 4.351426 1.461054 1.666717  
H 2.073888 0.959145 1.054704  
H 1.609475 -2.561876 2.290120  
H 0.883821 -0.961292 2.428992  
C 3.504427 -0.743587 -1.612560  
H 3.135721 -1.117441 -2.579339  
H 3.959388 -1.588750 -1.075610  
H 4.289873 -0.004179 -1.824242  
H 0.248016 2.494614 -1.931154  
H -0.101874 3.136906 2.062036  
H -1.153060 0.992814 2.459043  
H -0.627171 0.370198 0.897669  
H -3.132254 1.975335 1.513049  
H -2.412742 2.101546 -0.092086  
O -2.334125 -0.358024 -0.719456  
H -2.478364 -1.309732 -0.824777

4-c19,  $\Delta G = 2.5433$  kcal/mol, population = 0.61 %

O -1.561636 -0.929298 1.965490  
H -2.147823 -0.558493 2.645672  
C -2.414939 -1.355287 0.923110  
H -1.790624 -1.567636 0.045388  
H -2.926238 -2.303378 1.187588  
C -3.491263 -0.303963 0.609983

C -4.438184 -0.816865 -0.471544  
H -4.920878 -1.755912 -0.154064  
H -3.901357 -1.021336 -1.410082  
H -5.225277 -0.074756 -0.673682  
C -2.882656 1.061072 0.262339  
C -1.944701 1.093722 -0.952311  
C -1.331903 2.457645 -1.149428  
C -0.225290 2.928394 -0.543731  
C 0.253635 4.339378 -0.766500  
H 1.281321 4.359806 -1.167831  
H 0.284002 4.894037 0.188211  
H -0.395859 4.887797 -1.464434  
C 0.603138 2.096577 0.408660  
H 0.607744 2.593408 1.394459  
C 2.063988 1.880282 -0.058334  
H 2.750656 2.532344 0.501667  
H 2.168845 2.186790 -1.111717  
C 2.568530 0.417480 0.054874  
C 1.684676 -0.460005 -0.797021  
C 1.138729 -1.629883 -0.416708  
C 0.321993 -2.149451 -1.529900  
O -0.354936 -3.150055 -1.595019  
O 0.412400 -1.269854 -2.570957  
C 1.257080 -0.171304 -2.207909  
H 0.680276 0.762739 -2.300452  
H 2.103637 -0.123687 -2.912298  
C 1.336690 -2.279693 0.911877  
C 2.535424 -1.632331 1.615223  
H 2.557433 -1.936603 2.673418  
H 3.474606 -1.999586 1.166082  
C 2.492509 -0.095049 1.532212  
C 3.544732 0.533883 2.447232  
H 3.553439 1.632199 2.375755  
H 4.557751 0.172405 2.211210  
H 3.338128 0.272065 3.496514  
H 1.501314 0.204219 1.910766  
H 1.478536 -3.365398 0.785202  
H 0.423868 -2.145812 1.516744  
C 4.006665 0.354630 -0.504794  
H 4.659657 1.067322 0.018886  
H 4.022799 0.616978 -1.573215  
H 4.436401 -0.652363 -0.399802  
H 0.116523 1.126271 0.573211  
H -1.883194 3.142252 -1.805534

H -1.161570 0.334690 -0.819066  
H -2.496187 0.807714 -1.861925  
H -2.324984 1.406939 1.145308  
H -3.711498 1.773158 0.118682  
O -4.208404 -0.060928 1.834364  
H -4.745011 -0.843772 2.027735

4-c8,  $\Delta G = 2.6901$  kcal/mol, population = 0.48 %

O 3.947857 -1.343323 0.771043  
H 3.199407 -1.968802 0.785247  
C 3.425109 -0.029357 0.832470  
H 2.513501 -0.003800 1.451706  
H 4.174618 0.616971 1.320343  
C 3.114280 0.538142 -0.567023  
C 4.392862 0.592086 -1.408535  
H 4.860708 -0.402914 -1.440312  
H 5.121548 1.301051 -0.984722  
H 4.154328 0.905467 -2.436070  
C 2.460121 1.925051 -0.492175  
C 1.174567 1.993280 0.341249  
C 0.357562 3.233107 0.072530  
C -0.967594 3.347866 0.271849  
C -1.726120 4.606912 -0.049520  
H -2.540595 4.403037 -0.767391  
H -1.075488 5.382612 -0.480074  
H -2.208687 5.020365 0.853881  
C -1.782544 2.183872 0.802287  
H -1.192137 1.655502 1.561716  
C -2.195562 1.208731 -0.317280  
H -1.368100 1.150111 -1.035244  
H -3.053291 1.630931 -0.867030  
C -2.577597 -0.243166 0.108377  
C -1.341791 -0.951054 0.611464  
C -0.522265 -1.687990 -0.166869  
C 0.600725 -2.147693 0.656094  
O 1.598596 -2.770772 0.332470  
O 0.413336 -1.727265 1.929957  
C -0.804418 -0.974545 2.013050  
H -0.563969 0.017670 2.422240  
H -1.487475 -1.476690 2.717169  
C -0.724038 -1.999255 -1.611357  
C -1.906984 -1.197122 -2.180381  
H -1.546489 -0.211913 -2.509926

H -2.293601 -1.695991 -3.082169  
C -3.060444 -1.015624 -1.170402  
C -3.718397 -2.363867 -0.850686  
H -3.061078 -3.008636 -0.245624  
H -3.946292 -2.903294 -1.783399  
H -4.662992 -2.242184 -0.302429  
H -3.821257 -0.377351 -1.650440  
H -0.892177 -3.085901 -1.715037  
H 0.198231 -1.778806 -2.170686  
C -3.667658 -0.196516 1.190928  
H -3.931707 -1.199809 1.552201  
H -4.578623 0.275539 0.790907  
H -3.342033 0.391622 2.061283  
H -2.676729 2.561363 1.321704  
H 0.902560 4.102829 -0.316134  
H 0.583824 1.091616 0.124205  
H 1.424257 1.940460 1.417618  
H 2.230120 2.222388 -1.529487  
H 3.198259 2.653453 -0.117192  
O 2.162924 -0.317039 -1.214811  
H 2.435894 -1.234192 -1.058559

4-c7,  $\Delta G = 2.7999$  kcal/mol, population = 0.40 %

O 4.021256 0.976873 -1.551787  
H 3.194288 1.470687 -1.408533  
C 4.555395 0.561823 -0.312787  
H 5.333829 -0.184494 -0.542640  
H 5.047246 1.399803 0.221625  
C 3.537949 -0.058048 0.670604  
C 4.297436 -0.688948 1.835107  
H 4.971060 0.050630 2.295931  
H 4.895243 -1.549801 1.500994  
H 3.594460 -1.029696 2.609056  
C 2.657780 -1.084608 -0.069277  
C 1.485189 -1.643608 0.739948  
C 0.557492 -2.467107 -0.110550  
C -0.774314 -2.612641 0.017938  
C -1.534393 -3.525837 -0.911948  
H -2.279565 -2.982131 -1.517907  
H -2.100823 -4.285334 -0.344565  
H -0.857445 -4.045989 -1.604643  
C -1.572180 -1.976992 1.137255  
H -1.795960 -2.779226 1.865769

C -2.926505 -1.356048 0.755879  
H -3.527707 -1.257081 1.672535  
H -3.473484 -2.076692 0.131535  
C -2.967161 0.046325 0.039672  
C -1.661218 0.380187 -0.633836  
C -0.698195 1.150957 -0.084330  
C 0.368914 1.315280 -1.072978  
O 1.413805 1.947328 -0.980049  
O 0.054321 0.628839 -2.187668  
C -1.237219 0.018177 -2.025549  
H -1.129887 -1.063072 -2.187897  
H -1.912449 0.427620 -2.793180  
C -0.754062 1.808327 1.255433  
C -2.006866 1.354348 2.023590  
H -1.796683 0.409947 2.546155  
H -2.245403 2.089182 2.807500  
C -3.229852 1.171662 1.103623  
C -3.653914 2.513293 0.492161  
H -2.937686 2.870106 -0.264788  
H -3.713759 3.281224 1.279396  
H -4.642181 2.454958 0.015390  
H -4.065471 0.814284 1.727828  
H -0.755823 2.902495 1.106816  
H 0.163099 1.588600 1.825724  
C -4.100893 -0.000543 -1.002767  
H -4.171652 0.926382 -1.588424  
H -5.067055 -0.161973 -0.499944  
H -3.949084 -0.834153 -1.705558  
H -0.950693 -1.254585 1.679660  
H 1.045675 -3.031316 -0.916046  
H 1.871036 -2.263260 1.571017  
H 0.950588 -0.809398 1.215775  
H 3.302036 -1.910723 -0.416783  
H 2.272815 -0.613687 -0.984990  
O 2.741865 0.981081 1.254023  
H 2.281264 1.461263 0.542536

4-c15,  $\Delta G = 2.8062$  kcal/mol, population = 0.39 %

O -3.664603 -0.608112 -1.361229  
H -3.002976 -1.324264 -1.340699  
C -4.263654 -0.474567 -0.090630  
H -5.096462 0.237331 -0.209710  
H -4.701046 -1.435550 0.247196

C -3.359098 0.040442 1.048647  
C -4.233271 0.224862 2.290773  
H -4.947632 1.051708 2.159286  
H -3.595131 0.451872 3.157887  
H -4.794980 -0.695968 2.511646  
C -2.667329 1.385758 0.712679  
C -1.489683 1.287997 -0.266038  
C -0.763593 2.583014 -0.493481  
C 0.486639 2.904653 -0.105954  
C 1.083792 4.250833 -0.427641  
H 0.395354 4.877643 -1.013332  
H 2.022062 4.146832 -1.000068  
H 1.346571 4.793504 0.497872  
C 1.382190 1.977337 0.686744  
H 1.714792 2.515355 1.590562  
C 2.632720 1.461984 -0.077674  
H 3.550372 1.866436 0.374541  
H 2.626269 1.841826 -1.111979  
C 2.777860 -0.087084 -0.131104  
C 1.549934 -0.653549 -0.796761  
C 0.732888 -1.590729 -0.275862  
C -0.423846 -1.723532 -1.165486  
O -1.471723 -2.329473 -0.979435  
O -0.227329 -0.972765 -2.265847  
C 0.987369 -0.218687 -2.118067  
H 0.725252 0.850351 -2.140137  
H 1.648905 -0.439439 -2.969814  
C 0.953470 -2.295029 1.019756  
C 2.424422 -2.133111 1.416826  
H 2.578541 -2.495041 2.445001  
H 3.051501 -2.764593 0.763370  
C 2.888756 -0.668739 1.322343  
C 4.277441 -0.492897 1.939725  
H 4.247108 -0.745115 3.010845  
H 4.640753 0.542656 1.854376  
H 5.021016 -1.152471 1.466407  
H 2.184295 -0.089403 1.941030  
H 0.673088 -3.356508 0.927038  
H 0.285833 -1.867064 1.788911  
C 4.008157 -0.439438 -0.994612  
H 3.866680 -0.106106 -2.033460  
H 4.189080 -1.524595 -1.009667  
H 4.910084 0.057420 -0.611342  
H 0.793134 1.127179 1.053342

H -1.329934 3.347563 -1.041978  
H -0.802987 0.533522 0.131600  
H -1.864411 0.906598 -1.226219  
H -2.294007 1.814438 1.658685  
H -3.427493 2.089393 0.331580  
O -2.383123 -0.948783 1.404594  
H -2.130826 -1.467938 0.624092

4-c22,  $\Delta G = 2.9505$  kcal/mol, population = 0.31 %

O 2.207407 -0.532959 -1.630641  
H 2.206991 -1.274695 -0.996549  
C 3.237958 0.370039 -1.302500  
H 4.236079 -0.053310 -1.530392  
H 3.101577 1.237845 -1.969768  
C 3.257175 0.884025 0.154203  
C 4.259194 2.046934 0.212121  
H 3.985594 2.836942 -0.505633  
H 5.281593 1.711417 -0.022851  
H 4.260864 2.484514 1.221091  
C 3.684608 -0.182205 1.191867  
C 2.612886 -1.174381 1.678479  
C 2.299955 -2.336446 0.777075  
C 1.097818 -2.689842 0.273862  
C 0.939683 -3.961280 -0.519515  
H 0.173285 -4.610296 -0.060672  
H 1.882068 -4.524955 -0.572817  
H 0.600044 -3.761006 -1.548880  
C -0.155122 -1.869308 0.506048  
H -0.681261 -2.301515 1.375755  
C -1.120847 -1.810462 -0.685605  
H -1.599192 -2.789613 -0.837062  
H -0.551124 -1.611993 -1.607981  
C -2.235304 -0.732597 -0.572198  
C -1.592537 0.632093 -0.527227  
C -1.884546 1.609363 0.351669  
C -1.000548 2.757588 0.093266  
O -0.913201 3.820217 0.660827  
O -0.193031 2.438085 -0.971456  
C -0.520265 1.121508 -1.452070  
H 0.390334 0.501801 -1.440993  
H -0.871736 1.207547 -2.493805  
C -2.937214 1.531272 1.407142  
C -3.867671 0.351965 1.102168

H -4.506892 0.142198 1.973897  
H -4.546542 0.621023 0.274665  
C -3.079582 -0.917883 0.733862  
C -3.991775 -2.145193 0.699630  
H -4.829239 -2.010149 -0.002451  
H -4.423923 -2.323283 1.696507  
H -3.449411 -3.056833 0.406029  
H -2.354866 -1.068411 1.550614  
H -3.492519 2.482159 1.457040  
H -2.463917 1.404221 2.397729  
C -3.110792 -0.817443 -1.842256  
H -3.940210 -0.096069 -1.808759  
H -3.531428 -1.826337 -1.958877  
H -2.514073 -0.603195 -2.741584  
H 0.125657 -0.846267 0.792938  
H 3.149369 -2.999405 0.564620  
H 2.986532 -1.601238 2.626851  
H 1.707632 -0.610063 1.933141  
H 4.036836 0.365330 2.080627  
H 4.563023 -0.722060 0.799427  
O 1.966285 1.340151 0.549626  
H 1.628726 1.975572 -0.101556

4-c20,  $\Delta G = 2.9687$  kcal/mol, population = 0.30 %

O -5.716620 0.859586 -0.706468  
H -5.372794 1.296659 0.091992  
C -4.972513 -0.335644 -0.780031  
H -5.357266 -1.091968 -0.066159  
H -5.078267 -0.749930 -1.795229  
C -3.488311 -0.082863 -0.459518  
C -2.871280 0.830946 -1.522323  
H -3.504052 1.720235 -1.652953  
H -2.798387 0.309207 -2.488458  
H -1.865995 1.166204 -1.233097  
C -2.746339 -1.427463 -0.340648  
C -1.328785 -1.298859 0.223820  
C -0.590958 -2.600979 0.347634  
C 0.650294 -2.896823 -0.085216  
C 1.249191 -4.261185 0.143925  
H 2.196118 -4.194182 0.707419  
H 1.496968 -4.745145 -0.817526  
H 0.568222 -4.922571 0.699440  
C 1.539751 -1.924415 -0.828699

H 1.865180 -2.403773 -1.767452  
C 2.796056 -1.463693 -0.038631  
H 3.708987 -1.853539 -0.512753  
H 2.785269 -1.898834 0.973528  
C 2.956806 0.078026 0.100465  
C 1.728631 0.621456 0.785766  
C 0.924580 1.592913 0.311358  
C -0.235623 1.705750 1.206074  
O -1.262569 2.343530 1.065457  
O -0.045967 0.884171 2.268575  
C 1.161899 0.131520 2.086372  
H 0.903249 -0.938406 2.067715  
H 1.828392 0.315308 2.943640  
C 1.174651 2.375204 -0.934019  
C 2.647756 2.214352 -1.324190  
H 2.820891 2.638856 -2.325136  
H 3.276864 2.791720 -0.624325  
C 3.085842 0.739081 -1.316423  
C 4.474390 0.575291 -1.937522  
H 5.225852 1.196348 -1.426143  
H 4.453283 0.885819 -2.993431  
H 4.821286 -0.468876 -1.906801  
H 2.374444 0.208438 -1.970411  
H 0.909478 3.432907 -0.776163  
H 0.517927 2.014108 -1.746137  
C 4.183924 0.367872 0.990944  
H 4.375332 1.448499 1.069414  
H 5.084203 -0.115533 0.587040  
H 4.030833 -0.022499 2.008088  
H 0.952913 -1.048163 -1.131944  
H -1.140229 -3.392858 0.874172  
H -0.753651 -0.588568 -0.384078  
H -1.422081 -0.846038 1.224150  
H -2.718882 -1.906399 -1.334171  
H -3.333687 -2.092799 0.315512  
O -3.527456 0.586336 0.810399  
H -2.783717 1.212340 0.888578

4-c17,  $\Delta G = 3.1852$  kcal/mol, population = 0.21 %

O -5.667699 -0.314630 0.047459  
H -5.340151 0.158123 0.830529  
C -4.922951 0.220397 -1.025514  
H -5.056291 -0.441149 -1.896445

H -5.290933 1.228323 -1.304272  
C -3.431670 0.333820 -0.664754  
C -2.704500 1.168494 -1.717348  
H -3.129242 2.183035 -1.762109  
H -2.800496 0.705744 -2.711577  
H -1.633761 1.263729 -1.488641  
C -2.824778 -1.079598 -0.521447  
C -1.457834 -1.094496 0.165890  
C -0.859245 -2.461658 0.330942  
C 0.366071 -2.880711 -0.042002  
C 0.822005 -4.292654 0.223707  
H 1.748351 -4.307833 0.824127  
H 1.060496 -4.810771 -0.722250  
H 0.059858 -4.878906 0.757737  
C 1.377291 -2.005938 -0.750342  
H 1.709148 -2.530966 -1.661982  
C 2.625055 -1.641635 0.101259  
H 3.520039 -2.140553 -0.298835  
H 2.509279 -2.030555 1.125581  
C 2.931923 -0.118870 0.198028  
C 1.733210 0.565918 0.804763  
C 1.062476 1.604569 0.269306  
C -0.128199 1.854997 1.093473  
O -1.075995 2.588836 0.882290  
O -0.081953 1.044743 2.180242  
C 1.047495 0.165744 2.078403  
H 0.677232 -0.870827 2.060031  
H 1.681497 0.295357 2.969610  
C 1.457913 2.327056 -0.974881  
C 2.919297 1.991931 -1.293098  
H 3.181364 2.364175 -2.295421  
H 3.579835 2.516471 -0.580699  
C 3.187528 0.477940 -1.229180  
C 4.571078 0.142023 -1.789762  
H 5.368074 0.690294 -1.264123  
H 4.624235 0.423274 -2.852876  
H 4.797363 -0.932833 -1.720326  
H 2.444829 0.010502 -1.896326  
H 1.308704 3.411203 -0.846260  
H 0.801566 2.026395 -1.811508  
C 4.140864 0.081916 1.136342  
H 4.429034 1.141921 1.196881  
H 5.008279 -0.494260 0.785198  
H 3.907807 -0.262924 2.154827

H 0.888354 -1.088268 -1.100790  
H -1.508810 -3.191341 0.832740  
H -0.764902 -0.440738 -0.379461  
H -1.592906 -0.640003 1.160518  
H -2.754310 -1.538141 -1.522438  
H -3.535301 -1.688814 0.060636  
O -3.435214 0.994110 0.608431  
H -2.661731 1.580599 0.700588

4-c29,  $\Delta G = 3.6835$  kcal/mol, population = 0.09 %

O -2.890042 1.728943 -0.943527  
H -3.387362 1.520097 -1.751937  
C -3.801199 1.526503 0.115718  
H -3.222572 1.456647 1.049159  
H -4.487389 2.391340 0.222904  
C -4.649789 0.263337 -0.111018  
C -5.719211 0.129854 0.968745  
H -6.385283 1.008473 0.967864  
H -5.271392 0.053472 1.970859  
H -6.330564 -0.767800 0.791164  
C -3.781626 -0.995099 -0.242568  
C -2.965228 -1.389382 0.997251  
C -2.045601 -2.538870 0.695790  
C -0.707138 -2.484326 0.581783  
C 0.096251 -3.693005 0.178162  
H 0.659181 -3.496981 -0.752401  
H -0.538542 -4.574902 0.007231  
H 0.848057 -3.945958 0.946101  
C 0.092221 -1.213163 0.792099  
H -0.303710 -0.653717 1.652576  
C 0.100298 -0.304048 -0.448696  
H -0.877781 0.188158 -0.553614  
H 0.209638 -0.926688 -1.352836  
C 1.209353 0.782110 -0.478498  
C 2.562983 0.117096 -0.532803  
C 3.641523 0.468263 0.191460  
C 4.765151 -0.415763 -0.172268  
O 5.901137 -0.436798 0.240138  
O 4.325044 -1.288169 -1.127476  
C 2.946872 -1.035398 -1.417433  
H 2.369272 -1.949204 -1.205512  
H 2.841133 -0.808623 -2.490970  
C 3.688854 1.580100 1.184984

C 2.469907 2.487667 0.988568  
H 2.357742 3.159191 1.854187  
H 2.633727 3.137593 0.111903  
C 1.166936 1.689363 0.797018  
C -0.046789 2.619171 0.839070  
H 0.056904 3.445008 0.117687  
H -0.146960 3.067283 1.839908  
H -0.981540 2.095631 0.600296  
H 1.095326 1.005245 1.659131  
H 4.631913 2.141187 1.080874  
H 3.699240 1.159551 2.207044  
C 1.015738 1.606555 -1.772017  
H 1.736384 2.434622 -1.838211  
H -0.001977 2.019967 -1.809344  
H 1.149785 0.972903 -2.661776  
H 1.128152 -1.483432 1.057884  
H -2.539095 -3.498522 0.494832  
H -2.388393 -0.524044 1.354440  
H -3.652832 -1.668412 1.814425  
H -3.093784 -0.835495 -1.086534  
H -4.444999 -1.825833 -0.534403  
O -5.259561 0.402441 -1.407833  
H -5.944346 1.084873 -1.345657

4-c25,  $\Delta G = 3.7098$  kcal/mol, population = 0.09 %

O -4.906227 -0.180640 -0.668026  
H -4.713727 0.692099 -1.036470  
C -3.684089 -0.791930 -0.306012  
H -3.914183 -1.847995 -0.085067  
H -2.958761 -0.790825 -1.138387  
C -3.030187 -0.163249 0.941144  
C -3.950742 -0.309262 2.153668  
H -3.506598 0.177093 3.035619  
H -4.105673 -1.375005 2.386811  
H -4.931676 0.144625 1.950579  
C -2.669045 1.315620 0.716442  
C -1.842051 1.569260 -0.556900  
C -1.099107 2.879296 -0.562886  
C 0.162019 3.076062 -0.134003  
C 0.814084 4.432693 -0.189048  
H 1.723479 4.413501 -0.814835  
H 1.138593 4.754104 0.816570  
H 0.137086 5.198020 -0.596378



C 1.010642 1.962679 0.434426  
H 1.358371 2.268263 1.436122  
C 2.234506 1.595051 -0.434189  
H 3.092314 2.238181 -0.185046  
H 2.010418 1.801062 -1.493811  
C 2.674722 0.108801 -0.314396  
C 1.527311 -0.758149 -0.774535  
C 0.981074 -1.772518 -0.080540  
C -0.188421 -2.270888 -0.820492  
O -1.003534 -3.112808 -0.505828  
O -0.282220 -1.579768 -1.990652  
C 0.768614 -0.606450 -2.062781  
H 0.314303 0.387903 -2.188546  
H 1.387605 -0.814894 -2.950466  
C 1.470069 -2.273036 1.235415  
C 2.894070 -1.754472 1.463653  
H 3.205052 -1.948811 2.501942  
H 3.596823 -2.308144 0.816767  
C 3.001158 -0.246317 1.177546  
C 4.342783 0.314072 1.652814  
H 4.447172 1.386402 1.427089  
H 5.191722 -0.212671 1.190066  
H 4.436555 0.194890 2.743311  
H 2.214718 0.228569 1.786007  
H 1.428777 -3.374046 1.261788  
H 0.792689 -1.920171 2.033684  
C 3.879314 -0.129077 -1.249057  
H 4.700789 0.562486 -1.014793  
H 3.597150 0.038907 -2.299476  
H 4.256833 -1.158835 -1.163042  
H 0.393340 1.068131 0.592388  
H -1.653570 3.750305 -0.933711  
H -1.143016 0.731072 -0.659871  
H -2.498822 1.531384 -1.442517  
H -2.086739 1.636823 1.595113  
H -3.587052 1.925462 0.715105  
O -1.790777 -0.835137 1.187433  
H -1.875744 -1.774554 0.961068

4-c18,  $\Delta G = 3.7374$  kcal/mol, population = 0.08 %

O 3.152131 2.148809 0.315845  
H 2.488886 2.839540 0.139759  
C 2.526314 0.906111 0.060922

H 1.596814 0.807031 0.654198  
H 2.261285 0.809476 -1.004767  
C 3.483046 -0.215882 0.481549  
C 4.696107 -0.272840 -0.453439  
H 4.405341 -0.529920 -1.483636  
H 5.413690 -1.024677 -0.091632  
H 5.194911 0.707558 -0.476622  
C 2.733421 -1.553633 0.558084  
C 2.050130 -2.011698 -0.742805  
C 1.152028 -3.211149 -0.561556  
C -0.117607 -3.189703 -0.115051  
C -0.923418 -4.455524 0.024996  
H -1.804296 -4.448438 -0.640082  
H -1.312571 -4.563359 1.052885  
H -0.326460 -5.347487 -0.215257  
C -0.816912 -1.917283 0.307144  
H -1.101095 -2.029221 1.367545  
C -2.071202 -1.572613 -0.513063  
H -2.876063 -2.290227 -0.293868  
H -1.849537 -1.696531 -1.586415  
C -2.620986 -0.135055 -0.289971  
C -1.565956 0.862839 -0.703498  
C -1.143971 1.910977 0.030506  
C -0.040585 2.567035 -0.686609  
O 0.687535 3.471818 -0.328777  
O 0.119230 1.950362 -1.888235  
C -0.795645 0.851701 -1.992935  
H -0.214185 -0.071059 -2.146657  
H -1.435014 1.001477 -2.877424  
C -1.692435 2.307129 1.360070  
C -3.038242 1.605669 1.569844  
H -3.360714 1.718049 2.616477  
H -3.809966 2.094412 0.950396  
C -2.960757 0.109010 1.220994  
C -4.213124 -0.633995 1.689143  
H -5.129251 -0.197325 1.262367  
H -4.299629 -0.574066 2.785022  
H -4.188709 -1.700136 1.417107  
H -2.108892 -0.288362 1.796154  
H -1.792521 3.403158 1.415600  
H -0.979139 2.025844 2.155766  
C -3.856007 0.057463 -1.197755  
H -4.614278 -0.710731 -0.990823  
H -3.579675 -0.031138 -2.259050

H -4.313760 1.046518 -1.050303  
H -0.119202 -1.069525 0.276032  
H 1.590833 -4.187580 -0.799412  
H 1.467838 -1.177018 -1.160372  
H 2.816593 -2.245524 -1.498164  
H 1.975529 -1.451459 1.351323  
H 3.437938 -2.328602 0.903572  
O 3.918379 0.069981 1.812417  
H 4.046630 1.032913 1.830141

4-c16,  $\Delta G = 3.7475$  kcal/mol, population = 0.08 %

O -5.382579 0.661245 0.087361  
H -5.301400 0.012511 -0.632093  
C -4.577414 0.139114 1.122085  
H -4.366783 0.950464 1.836971  
H -5.104146 -0.665879 1.672926  
C -3.263467 -0.433988 0.568349  
C -2.533919 -1.224052 1.654492  
H -2.319070 -0.603141 2.537003  
H -1.583518 -1.624247 1.275650  
H -3.156307 -2.074263 1.971429  
C -2.405726 0.686384 -0.060915  
C -1.533392 1.508209 0.898029  
C -0.813136 2.617810 0.185214  
C 0.509012 2.871829 0.133535  
C 1.021761 4.073651 -0.622355  
H 0.198484 4.668776 -1.043124  
H 1.687413 3.786642 -1.453737  
H 1.618807 4.725806 0.039616  
C 1.557715 2.064466 0.872198  
H 1.955551 2.708145 1.676560  
C 2.752268 1.557110 0.023701  
H 3.696654 1.892075 0.476112  
H 2.737295 2.019938 -0.974703  
C 2.856583 0.018642 -0.170107  
C 1.599397 -0.500050 -0.820732  
C 0.894670 -1.577524 -0.421704  
C -0.265460 -1.726179 -1.311277  
O -1.196523 -2.506695 -1.248861  
O -0.201877 -0.766387 -2.270150  
C 0.933201 0.079879 -2.033622  
H 0.568466 1.105581 -1.865906  
H 1.574402 0.073558 -2.928832

C 1.251492 -2.462295 0.726074  
C 2.712084 -2.213460 1.116159  
H 2.926769 -2.688394 2.085838  
H 3.376528 -2.696591 0.379360  
C 3.046380 -0.713400 1.202184  
C 4.431055 -0.503892 1.819326  
H 4.715488 0.558442 1.855137  
H 5.211256 -1.044361 1.261278  
H 4.443115 -0.884147 2.852336  
H 2.309200 -0.271045 1.893364  
H 1.078253 -3.517003 0.458415  
H 0.584068 -2.252906 1.580888  
C 4.037206 -0.259255 -1.129400  
H 4.208521 -1.338191 -1.255509  
H 4.961688 0.197658 -0.749124  
H 3.843429 0.169295 -2.123848  
H 1.081182 1.219582 1.385393  
H -1.472827 3.303731 -0.362492  
H -2.173754 1.948209 1.685652  
H -0.823343 0.847676 1.414599  
H -3.093533 1.352528 -0.606216  
H -1.760818 0.237953 -0.827162  
O -3.700305 -1.317453 -0.472515  
H -2.915100 -1.738852 -0.869271

Coordinates of the dominating conformers of **5**

5-c12,  $\Delta G = 0.0000$  kcal/mol, population = 32.04 %

O -2.685060 -1.979803 1.242478  
C -3.564008 -1.518190 0.536096  
O -3.716407 -0.212195 0.329181  
C -2.697688 0.674177 0.828512  
C -2.911301 2.044814 0.196449  
C -4.190005 2.700997 0.722306  
H -5.057554 2.036432 0.593394  
H -4.095309 2.931473 1.796925  
H -4.397968 3.643057 0.191679  
H -3.024372 1.872217 -0.888991  
C -1.677421 2.939902 0.403372  
C -0.459961 2.511799 -0.431000  
C 0.737096 3.406215 -0.272031  
C 1.923582 3.098911 0.286617

C 3.039164 4.108620 0.364374  
H 2.756680 5.071302 -0.086439  
H 3.944664 3.741961 -0.149926  
H 3.332055 4.287663 1.414028  
C 2.242548 1.741475 0.870027  
H 2.614397 1.880915 1.899169  
C 3.285534 0.931355 0.057387  
H 4.267361 0.959732 0.553254  
H 3.441372 1.401879 -0.926909  
C 2.900576 -0.555394 -0.178339  
C 1.601405 -0.597158 -0.943688  
C 0.491205 -1.270524 -0.587392  
C -0.553946 -1.026423 -1.604555  
O -1.698889 -1.409784 -1.672303  
O -0.025292 -0.203325 -2.558662  
C 1.327561 0.124491 -2.231568  
H 1.416425 1.218362 -2.135801  
H 1.983793 -0.202844 -3.053841  
C 0.377867 -2.139869 0.639411  
C 1.793167 -2.526573 1.064374  
H 1.745437 -3.056924 2.028002  
H 2.195305 -3.238527 0.322883  
C 2.706814 -1.297775 1.188080  
C 4.024044 -1.654403 1.879758  
H 4.554199 -2.464762 1.356239  
H 3.828273 -1.998305 2.907008  
H 4.703166 -0.790382 1.942349  
H 2.177971 -0.592120 1.849375  
H -0.079864 -1.538484 1.447974  
O -0.398583 -3.297611 0.418927  
H -1.321529 -3.040732 0.599879  
C 3.993655 -1.218215 -1.044633  
H 4.979863 -1.119028 -0.570354  
H 4.055382 -0.739621 -2.033141  
H 3.788611 -2.288001 -1.199350  
H 1.318347 1.157673 0.966883  
H 0.608644 4.427776 -0.653423  
H -0.761365 2.497222 -1.494039  
H -0.196663 1.476642 -0.181578  
H -1.947150 3.977185 0.142570  
H -1.404389 2.957368 1.474061  
H -2.765307 0.721808 1.927972  
H -1.719775 0.249166 0.571479  
C -4.565623 -2.335970 -0.225698

H -4.142145 -2.508110 -1.228111  
H -4.714718 -3.304181 0.267784  
H -5.518079 -1.802295 -0.339254

5-c1,  $\Delta G = 0.4876$  kcal/mol, population = 14.06 %

O -1.098628 0.693464 -0.918504  
C -1.842648 1.613979 -1.184740  
O -2.984665 1.858453 -0.535444  
C -3.318032 1.082437 0.638349  
C -4.185604 -0.144785 0.339848  
C -5.381768 0.225498 -0.541892  
H -5.048687 0.524069 -1.548176  
H -6.064738 -0.630806 -0.651826  
H -5.953377 1.065005 -0.114703  
H -4.573170 -0.444525 1.331901  
C -3.425899 -1.358725 -0.223688  
C -2.316102 -1.887943 0.696674  
C -1.718824 -3.190034 0.239433  
C -0.494355 -3.395790 -0.281155  
C -0.036320 -4.777850 -0.673380  
H 0.862120 -5.077458 -0.105945  
H 0.248131 -4.810735 -1.740091  
H -0.815135 -5.534906 -0.498791  
C 0.509739 -2.289117 -0.511003  
H 0.879247 -2.375111 -1.547101  
C 1.711890 -2.330101 0.452112  
H 2.393575 -3.151437 0.182755  
H 1.353370 -2.566982 1.467839  
C 2.528445 -1.010504 0.526823  
C 1.625275 0.091644 1.021630  
C 1.484062 1.294738 0.444669  
C 0.469262 2.060924 1.172348  
O 0.037761 3.172883 0.943691  
O 0.032140 1.307190 2.218021  
C 0.711860 0.041499 2.214515  
H -0.041107 -0.757516 2.149942  
H 1.253167 -0.072353 3.167344  
C 2.194510 1.772654 -0.781750  
C 3.425968 0.895833 -0.980652  
H 3.879096 1.109775 -1.961008  
H 4.170053 1.170141 -0.213599  
C 3.067695 -0.598694 -0.888769  
C 4.227710 -1.471702 -1.370730

H 5.148162 -1.276652 -0.799189  
H 4.445695 -1.260606 -2.428963  
H 3.998707 -2.544981 -1.287283  
H 2.231113 -0.750617 -1.589239  
H 1.509281 1.637662 -1.643636  
O 2.575131 3.135576 -0.669874  
H 1.787889 3.620677 -0.372857  
C 3.671177 -1.198054 1.548607  
H 3.267887 -1.386378 2.555021  
H 4.311788 -0.305654 1.604100  
H 4.297596 -2.059861 1.278757  
H 0.020164 -1.309193 -0.448561  
H -2.375252 -4.064645 0.341584  
H -2.740095 -2.029694 1.708240  
H -1.541149 -1.118131 0.782418  
H -4.161182 -2.162474 -0.403551  
H -2.992263 -1.113010 -1.207054  
H -2.392733 0.818823 1.166301  
H -3.886578 1.785965 1.261963  
C -1.563607 2.648242 -2.240277  
H -0.980500 2.200357 -3.054819  
H -2.487434 3.100912 -2.621813  
H -0.954361 3.437420 -1.770077

5-c14,  $\Delta G = 0.6275$  kcal/mol, population =

11.10 %

O -1.666019 1.552992 1.907847  
C -2.484710 2.121066 1.213553  
O -3.527053 1.500153 0.652831  
C -3.667202 0.080263 0.865684  
C -4.591134 -0.488602 -0.201142  
C -6.025619 0.023877 -0.044200  
H -6.688679 -0.424195 -0.800558  
H -6.430792 -0.219781 0.950786  
H -6.063554 1.118013 -0.166708  
H -4.589649 -1.578002 -0.019728  
C -4.068980 -0.240622 -1.627297  
C -2.615979 -0.663536 -1.890188  
C -2.351440 -2.114000 -1.582272  
C -1.206114 -2.656844 -1.133852  
C -1.091910 -4.133499 -0.854999  
H -0.339543 -4.601407 -1.514365  
H -2.049228 -4.656346 -0.996545

H -0.750984 -4.317275 0.179128  
C 0.050136 -1.853519 -0.865642  
H 0.917481 -2.476255 -1.136475  
C 0.167309 -1.418439 0.603377  
H 0.009571 -2.289653 1.257238  
H -0.652472 -0.722514 0.838096  
C 1.497495 -0.736963 1.020068  
C 1.756030 0.467216 0.150437  
C 2.935149 0.770881 -0.418269  
C 2.809650 2.048804 -1.130973  
O 3.656256 2.669410 -1.740553  
O 1.533073 2.492950 -0.988324  
C 0.785185 1.562723 -0.190465  
H -0.073649 1.207028 -0.780809  
H 0.392807 2.078115 0.698421  
C 4.201471 -0.023913 -0.313268  
C 4.067608 -0.970917 0.874979  
H 4.892604 -1.699608 0.862181  
H 4.180155 -0.373043 1.794890  
C 2.717898 -1.711344 0.873616  
C 2.723293 -2.841072 1.905887  
H 3.496503 -3.581599 1.649903  
H 1.759789 -3.370681 1.947099  
H 2.947805 -2.466417 2.916369  
H 2.622318 -2.177858 -0.121106  
H 4.318641 -0.622898 -1.241063  
O 5.329164 0.818086 -0.134389  
H 5.262040 1.520125 -0.803002  
C 1.329205 -0.239358 2.475557  
H 1.061436 -1.075358 3.137500  
H 0.520731 0.502250 2.536299  
H 2.253719 0.220630 2.853993  
H 0.096144 -0.971920 -1.522215  
H -3.196199 -2.791729 -1.761864  
H -1.929666 -0.013983 -1.324834  
H -2.395891 -0.462278 -2.955510  
H -4.730723 -0.779881 -2.326776  
H -4.176350 0.830281 -1.865753  
H -2.675558 -0.386576 0.828335  
H -4.074937 -0.081555 1.876322  
C -2.428037 3.576210 0.835236  
H -1.845656 4.131363 1.580568  
H -1.922525 3.663797 -0.140694  
H -3.435447 4.000093 0.731508

5-c13,  $\Delta G = 0.6790$  kcal/mol, population = 10.17 %

O -0.877089 -1.739895 -0.311875  
C -1.676598 -2.648848 -0.231490  
O -2.881859 -2.528035 0.339579  
C -3.264597 -1.251558 0.887134  
C -3.978384 -0.370556 -0.140171  
C -5.191987 -1.092157 -0.731232  
H -4.910022 -2.063074 -1.164345  
H -5.953000 -1.276837 0.046173  
H -5.659030 -0.485186 -1.522220  
H -3.264375 -0.154056 -0.953978  
C -4.383367 0.962611 0.513416  
C -3.231143 1.964102 0.718652  
C -2.783471 2.618825 -0.559663  
C -1.602581 2.468726 -1.185336  
C -1.279180 3.216033 -2.452710  
H -2.094071 3.889152 -2.757817  
H -1.077788 2.514887 -3.281767  
H -0.362415 3.820206 -2.331375  
C -0.504110 1.576345 -0.651699  
H -0.934933 0.691312 -0.171461  
C 0.428114 2.304300 0.328088  
H -0.169871 2.710579 1.158469  
H 0.872442 3.183072 -0.169716  
C 1.573734 1.443539 0.923088  
C 2.409156 0.879595 -0.197203  
C 2.787181 -0.404346 -0.310848  
C 3.610853 -0.555912 -1.517313  
O 4.155673 -1.549431 -1.951672  
O 3.709134 0.658225 -2.122981  
C 2.985195 1.636675 -1.362173  
H 2.215926 2.089185 -2.007480  
H 3.683102 2.431170 -1.053056  
C 2.458261 -1.510726 0.644354  
C 2.038235 -0.877781 1.967324  
H 1.617395 -1.651363 2.628306  
H 2.945605 -0.489880 2.461356  
C 1.003436 0.242644 1.758593  
C 0.386006 0.666231 3.092890  
H 1.150708 0.989735 3.816197  
H -0.154474 -0.181596 3.541719

H -0.335686 1.488617 2.974057  
H 0.202236 -0.201939 1.151690  
H 1.601888 -2.080380 0.232346  
O 3.572663 -2.367155 0.851375  
H 3.914390 -2.597331 -0.028309  
C 2.471642 2.361765 1.782376  
H 1.874792 2.873494 2.550631  
H 2.948103 3.137160 1.164029  
H 3.267815 1.791568 2.283033  
H 0.083064 1.184879 -1.499170  
H -3.523931 3.287271 -1.018786  
H -2.389605 1.473493 1.229924  
H -3.582589 2.751271 1.408732  
H -5.155938 1.441011 -0.112315  
H -4.869268 0.752800 1.483135  
H -3.946984 -1.495885 1.714555  
H -2.373431 -0.757156 1.295957  
C -1.432779 -4.052091 -0.717205  
H -1.193795 -4.690703 0.148539  
H -2.333047 -4.462677 -1.194598  
H -0.586014 -4.062540 -1.413667

5-c11,  $\Delta G = 0.8365$  kcal/mol, population = 7.80 %

O -1.730400 1.339204 1.524591  
C -2.799315 1.884226 1.708909  
O -3.733038 2.022876 0.759918  
C -3.490626 1.454673 -0.541220  
C -4.116400 0.066878 -0.678123  
C -5.625157 0.119578 -0.426953  
H -6.129248 0.718054 -1.205019  
H -6.060300 -0.891630 -0.445233  
H -5.852569 0.573818 0.548815  
H -3.653855 -0.585936 0.083680  
C -3.791384 -0.510172 -2.068020  
C -2.390810 -1.127380 -2.205699  
C -2.253565 -2.414593 -1.436583  
C -1.194447 -2.865928 -0.742393  
C -1.236257 -4.200593 -0.041349  
H -1.014166 -4.095965 1.034699  
H -0.468436 -4.881610 -0.449364  
H -2.217510 -4.687363 -0.140587  
C 0.104218 -2.103240 -0.592552  
H 0.935012 -2.819825 -0.697674

C 0.201328 -1.389162 0.764306  
H 0.045738 -2.118300 1.573995  
H -0.628753 -0.671828 0.848216  
C 1.522566 -0.628563 1.052126  
C 1.736900 0.447941 0.018654  
C 2.907700 0.712498 -0.586607  
C 2.738560 1.867985 -1.476306  
O 3.566181 2.427381 -2.166665  
O 1.444838 2.276330 -1.403661  
C 0.725338 1.438497 -0.485452  
H -0.106401 0.959768 -1.024354  
H 0.288310 2.058465 0.310433  
C 4.201629 -0.014004 -0.376344  
C 4.096773 -0.806755 0.922421  
H 4.942971 -1.506809 0.998608  
H 4.191402 -0.094975 1.759316  
C 2.768531 -1.580162 1.016071  
C 2.805115 -2.582283 2.171526  
H 3.011219 -2.086839 3.132804  
H 3.603191 -3.322102 2.004828  
H 1.858388 -3.133982 2.270763  
H 2.684226 -2.160811 0.082198  
H 4.346195 -0.721985 -1.219837  
O 5.297067 0.885285 -0.307138  
H 5.210182 1.488075 -1.064398  
C 1.367788 0.063360 2.427780  
H 2.275861 0.616538 2.708376  
H 1.161298 -0.682948 3.208431  
H 0.521515 0.763335 2.409412  
H 0.227309 -1.375838 -1.408661  
H -3.138537 -3.063650 -1.479241  
H -1.620877 -0.400679 -1.905097  
H -2.210956 -1.325111 -3.279013  
H -4.535803 -1.287869 -2.308478  
H -3.927721 0.278849 -2.828335  
H -3.957280 2.153910 -1.250637  
H -2.409376 1.429593 -0.723748  
C -3.252997 2.468941 3.018451  
H -3.992215 1.789971 3.473173  
H -2.398220 2.575478 3.696586  
H -3.746679 3.437591 2.859346

O -2.440177 -0.639216 -1.816936  
C -3.622006 -0.722172 -1.557209  
O -4.109527 -0.779822 -0.311115  
C -3.199621 -0.680443 0.800829  
C -3.136881 0.746407 1.348282  
C -4.519816 1.220678 1.800887  
H -4.874826 0.625530 2.659529  
H -4.488518 2.276230 2.112656  
H -5.259795 1.122920 0.992784  
H -2.789459 1.405024 0.532891  
C -2.109841 0.816447 2.491636  
C -0.641542 0.858691 2.028611  
C -0.234611 2.196803 1.475760  
C -0.002622 2.541828 0.194950  
C 0.413546 3.947468 -0.158346  
H -0.268718 4.383921 -0.908590  
H 1.421159 3.968943 -0.606482  
H 0.426032 4.603014 0.724426  
C -0.194835 1.604796 -0.976008  
H -0.622635 0.655051 -0.639060  
C 1.009460 1.326765 -1.896818  
H 1.452892 2.272857 -2.243823  
H 0.614467 0.841191 -2.804263  
C 2.149853 0.425935 -1.343544  
C 1.555652 -0.827439 -0.753863  
C 1.826288 -1.308806 0.471188  
C 1.062518 -2.544566 0.681825  
O 1.048442 -3.277505 1.649877  
O 0.325132 -2.785322 -0.433833  
C 0.587617 -1.767120 -1.418101  
H -0.368665 -1.301676 -1.697050  
H 1.018635 -2.249940 -2.310031  
C 2.785957 -0.720795 1.459853  
C 3.732396 0.198987 0.696503  
H 4.346547 0.772609 1.407887  
H 4.420973 -0.435952 0.113101  
C 2.968478 1.165695 -0.225688  
C 3.914494 2.236519 -0.774055  
H 4.786664 1.791889 -1.277944  
H 4.292813 2.861336 0.049512  
H 3.416713 2.904291 -1.492916  
H 2.224046 1.672130 0.405364  
H 2.214202 -0.119088 2.196310  
O 3.525149 -1.731026 2.127769

5-c10,  $\Delta G = 1.0981$  kcal/mol, population = 5.01 %

H 2.882702 -2.398964 2.420443  
C 3.055324 0.015136 -2.527496  
H 3.416064 0.902994 -3.065671  
H 2.502496 -0.605025 -3.248666  
H 3.927286 -0.560887 -2.184112  
H -0.975326 2.053023 -1.616990  
H -0.127072 2.985853 2.231800  
H -0.452318 0.056614 1.302294  
H -0.000632 0.633907 2.898394  
H -2.314850 1.713667 3.099418  
H -2.262004 -0.045756 3.165096  
H -3.602658 -1.362033 1.564675  
H -2.212438 -1.043162 0.487405  
C -4.726302 -0.761089 -2.578577  
H -4.303483 -0.900761 -3.580244  
H -5.437429 -1.565584 -2.343076  
H -5.280710 0.190188 -2.544433

5-c27,  $\Delta G = 1.1967$  kcal/mol, population = 4.24 %

O -0.939426 -1.882043 -0.973415  
C -1.830278 -2.255585 -0.237915  
O -3.064308 -1.738014 -0.258358  
C -3.331237 -0.652102 -1.170959  
C -4.501031 0.167528 -0.642995  
C -5.823511 -0.599421 -0.730146  
H -6.047451 -0.895522 -1.767301  
H -5.783504 -1.514485 -0.117659  
H -6.660747 0.015069 -0.363682  
H -4.557955 1.037957 -1.320855  
C -4.261748 0.690457 0.784737  
C -2.891285 1.338157 1.035842  
C -2.570581 2.474408 0.105362  
C -1.417345 2.670762 -0.559349  
C -1.205083 3.874570 -1.438628  
H -0.325580 4.455079 -1.107667  
H -2.077440 4.544798 -1.441448  
H -0.998078 3.569024 -2.479452  
C -0.232761 1.734486 -0.429278  
H -0.571550 0.690461 -0.396986  
C 0.616007 2.040673 0.816132  
H -0.050619 2.164148 1.682795  
H 1.114936 3.015722 0.686229  
C 1.683591 0.974916 1.185483

C 2.551871 0.689826 -0.011884  
C 2.833847 -0.532814 -0.491563  
C 3.727922 -0.397357 -1.649671  
O 4.220792 -1.264112 -2.341042  
O 3.967419 0.926145 -1.852001  
C 3.274076 1.699329 -0.861354  
H 2.598251 2.404492 -1.370256  
H 4.012792 2.285073 -0.291172  
C 2.361113 -1.836203 0.077279  
C 1.924719 -1.584161 1.517002  
H 1.413980 -2.477598 1.908408  
H 2.832268 -1.437043 2.127234  
C 0.992194 -0.365002 1.627318  
C 0.360819 -0.293349 3.019434  
H -0.263738 -1.182576 3.195732  
H -0.284771 0.589322 3.138360  
H 1.123459 -0.266795 3.812702  
H 0.179936 -0.541373 0.907061  
H 1.483716 -2.178573 -0.505368  
O 3.389799 -2.815900 0.052645  
H 3.761279 -2.807822 -0.844839  
C 2.575471 1.551660 2.307420  
H 1.962794 1.877901 3.159639  
H 3.136373 2.428451 1.951319  
H 3.301732 0.807328 2.665941  
H 0.390462 1.811764 -1.334161  
H -3.368147 3.218725 -0.019151  
H -2.104683 0.570370 0.997942  
H -2.883290 1.710131 2.077503  
H -5.057841 1.418853 1.016290  
H -4.390462 -0.141803 1.496394  
H -2.427213 -0.040696 -1.272786  
H -3.559704 -1.081250 -2.159744  
C -1.681175 -3.302161 0.832276  
H -2.596622 -3.900177 0.932477  
H -0.818944 -3.943025 0.612530  
H -1.507113 -2.793106 1.794093

5-c5,  $\Delta G = 1.3404$  kcal/mol, population = 3.33 %

O -1.104842 -1.365086 -0.979646  
C -1.553079 -2.300003 -0.348443  
O -2.282879 -2.158896 0.765000  
C -2.562432 -0.827237 1.244245

C -3.750122 -0.178208 0.527791  
C -4.954412 -1.123172 0.482229  
H -5.790326 -0.658558 -0.063340  
H -4.707641 -2.071631 -0.016401  
H -5.307616 -1.360240 1.500459  
H -3.434593 0.043628 -0.505445  
C -4.133893 1.147596 1.207513  
C -3.086127 2.277310 1.152140  
C -2.791788 2.737066 -0.249033  
C -1.661959 2.569376 -0.961824  
C -1.580776 3.042734 -2.391332  
H -0.814012 3.825287 -2.520859  
H -2.542151 3.450244 -2.736472  
H -1.296118 2.215044 -3.065274  
C -0.456433 1.832507 -0.421100  
H -0.525403 1.784863 0.672345  
C 0.913126 2.395300 -0.811231  
H 1.019151 3.429606 -0.445955  
H 0.997184 2.458440 -1.908008  
C 2.116978 1.557835 -0.298709  
C 1.991767 0.143227 -0.807709  
C 2.124001 -0.963571 -0.059080  
C 1.965820 -2.142616 -0.917078  
O 2.020676 -3.318864 -0.611249  
O 1.757053 -1.724578 -2.188004  
C 1.712996 -0.290001 -2.220485  
H 0.712942 0.014533 -2.564344  
H 2.461594 0.069885 -2.943397  
C 2.414250 -1.007424 1.409421  
C 3.002832 0.341648 1.809308  
H 3.070739 0.406025 2.906259  
H 4.033340 0.388623 1.418296  
C 2.161681 1.512685 1.270746  
C 2.604950 2.833958 1.902540  
H 3.675178 3.027408 1.732206  
H 2.445034 2.803524 2.991266  
H 2.038691 3.691076 1.508304  
H 1.128656 1.323460 1.603871  
H 1.455809 -1.158056 1.951040  
O 3.322808 -2.047709 1.731819  
H 3.004143 -2.846693 1.279551  
C 3.412543 2.164432 -0.883585  
H 3.420373 2.085115 -1.980817  
H 4.307010 1.651140 -0.501250

H 3.488188 3.231241 -0.630139  
H -0.527766 0.786382 -0.761180  
H -3.634836 3.229734 -0.751604  
H -2.169481 1.968437 1.675657  
H -3.490725 3.126912 1.730409  
H -5.062901 1.510338 0.735213  
H -4.389940 0.946015 2.263322  
H -2.789032 -0.964212 2.311875  
H -1.653014 -0.221612 1.146094  
C -1.324916 -3.744942 -0.698936  
H -1.387664 -3.865272 -1.788893  
H -0.299279 -4.010472 -0.397471  
H -2.039147 -4.405287 -0.192680

5-c8,  $\Delta G = 1.4960$  kcal/mol, population = 2.56 %

O -2.258198 0.830893 -2.003797  
C -3.300371 0.924273 -1.390019  
O -3.975273 -0.140587 -0.927745  
C -3.350241 -1.429361 -1.090152  
C -2.326571 -1.686203 0.014292  
C -2.997140 -1.777038 1.385903  
H -3.628035 -2.679414 1.456024  
H -2.254147 -1.811503 2.195277  
H -3.632416 -0.896466 1.561337  
H -1.651162 -0.813759 0.015112  
C -1.460009 -2.905136 -0.335289  
C -0.354069 -3.172266 0.708851  
C 0.879871 -3.850255 0.167238  
C 1.904292 -3.226908 -0.445019  
C 3.112504 -3.979334 -0.937195  
H 4.033788 -3.618803 -0.447228  
H 3.258225 -3.825669 -2.021020  
H 3.027776 -5.059582 -0.748040  
C 1.915493 -1.734194 -0.689113  
H 2.117002 -1.561787 -1.759852  
C 2.950273 -0.959212 0.150896  
H 3.956249 -1.071455 -0.281581  
H 3.010294 -1.405811 1.157172  
C 2.644597 0.557722 0.313025  
C 1.328921 0.706884 1.034656  
C 0.287404 1.441089 0.606945  
C -0.822388 1.293137 1.558416  
O -1.933136 1.782078 1.524307



O -0.416704 0.471978 2.563893  
C 0.944347 0.072775 2.342466  
H 0.993003 -1.026112 2.332845  
H 1.559116 0.433837 3.182362  
C 0.265327 2.301577 -0.620857  
C 1.712325 2.569279 -1.021542  
H 1.738311 3.070428 -2.001489  
H 2.153252 3.265239 -0.287556  
C 2.517508 1.258540 -1.085562  
C 3.863321 1.466692 -1.781604  
H 3.703947 1.785820 -2.822983  
H 4.460906 0.542662 -1.804924  
H 4.463087 2.245522 -1.286010  
H 1.927855 0.575063 -1.717200  
H -0.245828 1.748911 -1.429563  
O -0.411948 3.528195 -0.378843  
H -1.254609 3.304082 0.047298  
C 3.752545 1.192354 1.181250  
H 3.600358 2.275601 1.297456  
H 4.741521 1.026781 0.731825  
H 3.768689 0.743337 2.185583  
H 0.916916 -1.315442 -0.504483  
H 0.934823 -4.939834 0.278006  
H -0.764330 -3.766107 1.540217  
H -0.073584 -2.205402 1.150171  
H -2.090855 -3.803219 -0.459649  
H -0.988422 -2.722406 -1.314801  
H -4.173729 -2.156648 -1.049544  
H -2.875483 -1.473356 -2.079885  
C -3.976839 2.216432 -1.028762  
H -3.493368 3.044980 -1.559928  
H -5.050117 2.176452 -1.262498  
H -3.865415 2.365211 0.055650

5-c18,  $\Delta G = 1.6579$  kcal/mol, population = 1.95 %

O 1.000410 -1.347833 -0.534437  
C 1.752413 -1.989675 -1.237346  
O 2.961085 -1.549175 -1.612774  
C 3.378996 -0.259505 -1.113071  
C 3.914484 -0.360789 0.315201  
C 5.166927 -1.239955 0.365515  
H 5.496511 -1.399721 1.404002  
H 4.979609 -2.224609 -0.088433

H 5.998593 -0.766801 -0.183869  
H 3.124776 -0.839513 0.919197  
C 4.176482 1.023483 0.931802  
C 2.919649 1.885804 1.186925  
C 2.539516 2.831229 0.080907  
C 1.383349 2.884083 -0.604798  
C 1.137793 3.951361 -1.640193  
H 1.969649 4.668314 -1.703444  
H 0.215049 4.514279 -1.413531  
H 0.987448 3.503251 -2.638380  
C 0.246663 1.904181 -0.407353  
H -0.266755 1.784668 -1.374440  
C -0.769119 2.345128 0.657527  
H -1.143625 3.354667 0.425609  
H -0.249251 2.439016 1.625925  
C -1.989034 1.400253 0.845675  
C -1.506584 0.003256 1.149256  
C -1.926087 -1.112218 0.532918  
C -1.223826 -2.268865 1.099932  
O -1.329646 -3.443862 0.807340  
O -0.407357 -1.829549 2.089858  
C -0.486573 -0.400058 2.177842  
H 0.510868 0.013691 1.967947  
H -0.769276 -0.123051 3.205534  
C -2.943561 -1.186552 -0.561172  
C -3.764665 0.098001 -0.522240  
H -4.411773 0.152821 -1.411399  
H -4.428353 0.048635 0.357770  
C -2.865950 1.346183 -0.456472  
C -3.688292 2.615861 -0.688322  
H -4.514237 2.703068 0.034264  
H -4.132743 2.598083 -1.695310  
H -3.075233 3.526535 -0.613762  
H -2.160068 1.257458 -1.297899  
H -2.406278 -1.243982 -1.531864  
O -3.792554 -2.313218 -0.408841  
H -3.213305 -3.073759 -0.233212  
C -2.805042 1.900188 2.059012  
H -3.085483 2.955299 1.931902  
H -2.214708 1.825706 2.984470  
H -3.722965 1.309752 2.195962  
H 0.631426 0.907608 -0.156809  
H 3.303286 3.583920 -0.156023  
H 3.108903 2.496624 2.087527

H 2.078375 1.227221 1.450216  
H 4.685956 0.854029 1.894034  
H 4.895913 1.582447 0.305862  
H 4.169000 0.069077 -1.803622  
H 2.538491 0.439388 -1.181137  
C 1.440521 -3.349633 -1.799174  
H 2.288360 -4.032386 -1.645196  
H 0.536263 -3.741593 -1.318350  
H 1.276472 -3.266114 -2.885268

5-c17,  $\Delta G = 1.8712$  kcal/mol, population = 1.36 %

O 2.520526 -1.688010 -0.951060  
C 3.657994 -1.701557 -1.372223  
O 4.532342 -0.706212 -1.177751  
C 4.109874 0.431463 -0.396426  
C 4.212085 0.169336 1.107178  
C 5.607442 -0.339919 1.482325  
H 6.372257 0.427265 1.272470  
H 5.659535 -0.582074 2.555158  
H 5.873713 -1.243339 0.914796  
H 3.473538 -0.612729 1.355425  
C 3.857462 1.422456 1.926371  
C 2.402937 1.916695 1.841674  
C 2.065321 2.690702 0.594659  
C 0.932124 2.631074 -0.126789  
C 0.734844 3.483345 -1.353548  
H 0.527648 2.861380 -2.242131  
H 1.616326 4.104404 -1.571044  
H -0.137764 4.149621 -1.233571  
C -0.205200 1.688042 0.203115  
H -0.204754 1.455899 1.276182  
C -0.121000 0.388620 -0.611045  
H 0.845374 -0.097849 -0.423984  
H -0.116477 0.634937 -1.686455  
C -1.240600 -0.654977 -0.361448  
C -2.585376 -0.042914 -0.651136  
C -3.667454 -0.136831 0.139624  
C -4.794136 0.549969 -0.504651  
O -5.941423 0.658779 -0.124191  
O -4.359437 1.069201 -1.684102  
C -2.972628 0.748062 -1.870342  
H -2.402974 1.684883 -1.975268  
H -2.865387 0.174998 -2.805087

C -3.744665 -0.861890 1.449146  
C -2.564372 -1.825459 1.525377  
H -2.483651 -2.232397 2.545188  
H -2.782448 -2.674610 0.855849  
C -1.239375 -1.150175 1.127349  
C -0.049045 -2.051763 1.464088  
H 0.015680 -2.199284 2.553241  
H 0.904259 -1.627289 1.119182  
H -0.154431 -3.045867 1.002503  
H -1.153600 -0.246390 1.752926  
H -3.657199 -0.117657 2.268745  
O -4.962173 -1.579844 1.574445  
H -5.674769 -0.966107 1.330300  
C -1.015042 -1.827027 -1.345875  
H -1.151590 -1.493759 -2.385766  
H -1.719912 -2.650952 -1.161417  
H 0.012098 -2.204726 -1.253476  
H -1.163712 2.197768 0.003781  
H 2.838755 3.398573 0.268216  
H 2.232373 2.577241 2.712956  
H 1.722141 1.061761 1.975581  
H 4.078606 1.191565 2.981060  
H 4.543502 2.244497 1.649607  
H 4.793736 1.239966 -0.693374  
H 3.089564 0.707168 -0.687214  
C 4.274657 -2.829364 -2.155635  
H 4.828345 -2.439323 -3.021282  
H 4.995873 -3.359786 -1.513544  
H 3.495441 -3.529414 -2.479082

5-c6,  $\Delta G = 2.0369$  kcal/mol, population = 1.03 %

O -2.048669 -1.218974 -1.278283  
C -2.549250 -1.834434 -0.356197  
O -3.848087 -1.772442 -0.047130  
C -4.703900 -0.862614 -0.773602  
C -5.192527 0.254295 0.148214  
C -6.067843 -0.303829 1.275405  
H -5.486339 -0.983745 1.917805  
H -6.460844 0.507011 1.907985  
H -6.924332 -0.868936 0.874294  
H -5.819957 0.901005 -0.493047  
C -4.051187 1.114075 0.713022  
C -3.181682 1.844258 -0.325487

C -2.245760 2.823895 0.327616  
C -0.932769 2.666285 0.573241  
C -0.143024 3.730788 1.293563  
H 0.268459 3.337048 2.239942  
H -0.756770 4.613532 1.525183  
H 0.724053 4.066187 0.699113  
C -0.133055 1.446468 0.169522  
H 0.483979 1.149026 1.033821  
C 0.778027 1.700696 -1.054048  
H 0.952104 2.780153 -1.178198  
H 0.247432 1.385251 -1.967031  
C 2.170532 1.011809 -1.017007  
C 2.001291 -0.460577 -0.745875  
C 2.624220 -1.146263 0.228328  
C 2.219563 -2.555166 0.157286  
O 2.572316 -3.488469 0.849427  
O 1.341681 -2.694358 -0.871589  
C 1.146999 -1.422486 -1.519632  
H 0.072063 -1.185315 -1.501710  
H 1.467455 -1.517310 -2.569665  
C 3.628833 -0.593613 1.193415  
C 4.175377 0.700070 0.599335  
H 4.799619 1.216137 1.345032  
H 4.834626 0.429695 -0.243164  
C 3.051204 1.636605 0.125382  
C 3.618649 3.013819 -0.227436  
H 4.045591 3.485324 0.670873  
H 2.848468 3.693115 -0.622011  
H 4.422190 2.943926 -0.976572  
H 2.379237 1.776022 0.988754  
H 3.117757 -0.363765 2.152147  
O 4.690239 -1.507812 1.415649  
H 4.283203 -2.374573 1.582439  
C 2.835438 1.175326 -2.401500  
H 2.876997 2.234935 -2.689837  
H 2.261800 0.646643 -3.176961  
H 3.859625 0.773592 -2.404611  
H -0.791096 0.593301 -0.037469  
H -2.715671 3.749335 0.686179  
H -3.846848 2.388162 -1.020368  
H -2.625121 1.115254 -0.929692  
H -4.496042 1.861907 1.391409  
H -3.401214 0.488054 1.349951  
H -4.155155 -0.474548 -1.639766

H -5.551918 -1.465852 -1.129028  
C -1.782057 -2.714104 0.590857  
H -2.423661 -3.490091 1.026767  
H -0.918130 -3.152918 0.076855  
H -1.403411 -2.080428 1.410087

5-c28,  $\Delta G = 2.2967$  kcal/mol, population = 0.66 %

O -2.643224 1.282824 -0.703706  
C -3.770625 1.488951 -1.100548  
O -4.858438 1.425507 -0.322279  
C -4.721261 1.030295 1.059086  
C -5.172569 -0.417117 1.262910  
C -6.625933 -0.605699 0.815937  
H -7.296339 0.110209 1.317890  
H -6.721481 -0.451326 -0.270198  
H -6.978758 -1.622487 1.047043  
H -5.121931 -0.581140 2.355488  
C -4.245331 -1.443452 0.593517  
C -2.836836 -1.535371 1.193562  
C -2.007659 -2.601545 0.529264  
C -0.699419 -2.550027 0.223555  
C -0.011503 -3.698672 -0.469612  
H 0.815402 -4.094210 0.146219  
H 0.440113 -3.376003 -1.424532  
H -0.705003 -4.523567 -0.689331  
C 0.181592 -1.356259 0.524661  
H -0.213066 -0.797494 1.384280  
C 0.329673 -0.410954 -0.679176  
H -0.612713 0.134558 -0.824421  
H 0.470995 -1.006288 -1.596955  
C 1.497376 0.606406 -0.594346  
C 2.811252 -0.132592 -0.566553  
C 3.837939 0.143199 0.255353  
C 4.957674 -0.754726 -0.056018  
O 6.064311 -0.796551 0.439923  
O 4.573060 -1.581929 -1.064524  
C 3.227020 -1.272655 -1.455198  
H 2.605821 -2.171757 -1.318800  
H 3.219841 -1.009909 -2.525114  
C 3.870558 1.213921 1.303617  
C 2.744549 2.199790 1.010350  
H 2.612704 2.876729 1.868437  
H 3.057275 2.822091 0.155085

C 1.415850 1.485437 0.701599  
C 0.255156 2.482033 0.689005  
H 0.138438 2.934115 1.686425  
H -0.698049 2.009616 0.415578  
H 0.439562 3.303421 -0.021463  
H 1.240627 0.784626 1.534719  
H 3.687581 0.740542 2.291473  
O 5.116609 1.892714 1.315195  
H 5.806937 1.209188 1.326987  
C 1.459441 1.472483 -1.874617  
H 2.240496 2.246386 -1.865122  
H 0.480555 1.962431 -1.972922  
H 1.609592 0.851607 -2.770647  
H 1.177274 -1.723358 0.831390  
H -2.550142 -3.521640 0.273526  
H -2.937273 -1.760241 2.273741  
H -2.336531 -0.560121 1.120128  
H -4.724872 -2.434903 0.666041  
H -4.174211 -1.229414 -0.487634  
H -3.682819 1.187099 1.376449  
H -5.373687 1.713630 1.620925  
C -4.133668 1.826036 -2.521616  
H -3.232846 2.103158 -3.081613  
H -4.593822 0.941512 -2.990381  
H -4.873700 2.637895 -2.549369

5-c21,  $\Delta G = 2.3500$  kcal/mol, population = 0.60 %

O -4.500358 1.470355 -0.040882  
C -3.491661 1.307695 0.609745  
O -2.403088 0.675907 0.129271  
C -2.476790 0.165422 -1.213411  
C -3.131155 -1.219112 -1.288338  
C -3.579278 -1.482933 -2.730196  
H -4.049454 -2.474099 -2.820169  
H -4.306099 -0.728521 -3.069799  
H -2.718911 -1.459152 -3.420455  
H -4.030591 -1.186907 -0.649255  
C -2.208442 -2.346061 -0.801515  
C -1.730275 -2.257021 0.658682  
C -0.774869 -3.368985 1.018008  
C 0.533095 -3.412691 0.702316  
C 1.397330 -4.593298 1.060946  
H 1.877677 -5.015818 0.160451

H 0.816543 -5.389650 1.549121  
H 2.216857 -4.304018 1.741141  
C 1.216236 -2.295709 -0.051938  
H 1.518209 -2.673819 -1.044822  
C 2.447739 -1.710606 0.659911  
H 3.338023 -2.325879 0.460930  
H 2.298861 -1.755047 1.751781  
C 2.757665 -0.238264 0.287039  
C 1.618140 0.637577 0.745403  
C 1.061407 1.625256 0.024933  
C 0.050930 2.304517 0.846258  
O -0.624625 3.276747 0.576409  
O -0.004606 1.683700 2.052957  
C 0.933756 0.599194 2.083551  
H 0.383525 -0.340570 2.252454  
H 1.622720 0.751625 2.929148  
C 1.435286 2.020483 -1.371543  
C 2.808870 1.431636 -1.682425  
H 3.016685 1.526788 -2.759249  
H 3.561423 2.040976 -1.154691  
C 2.913552 -0.046083 -1.261068  
C 4.181893 -0.687632 -1.825488  
H 4.286873 -1.736853 -1.510586  
H 5.086795 -0.146516 -1.508781  
H 4.156444 -0.671812 -2.925828  
H 2.053164 -0.559043 -1.721752  
H 0.688872 1.581864 -2.067707  
O 1.469009 3.429689 -1.524134  
H 0.647589 3.773623 -1.135118  
C 4.027976 0.196816 1.052803  
H 4.870827 -0.465347 0.809058  
H 3.867335 0.138337 2.139628  
H 4.314863 1.229849 0.809797  
H 0.497963 -1.488159 -0.247566  
H -1.202381 -4.234680 1.538365  
H -2.607043 -2.288329 1.326434  
H -1.265817 -1.275505 0.828341  
H -2.722501 -3.311635 -0.946205  
H -1.324504 -2.377617 -1.463296  
H -3.034356 0.885053 -1.828206  
H -1.434463 0.128989 -1.563937  
C -3.276294 1.791913 2.015654  
H -2.793115 1.015748 2.624267  
H -2.589921 2.651787 1.983030

H -4.235579 2.092907 2.453065

5-c25,  $\Delta G = 2.3538$  kcal/mol, population = 0.60 %

O -2.502828 -1.317253 1.936930

C -3.514380 -1.269749 1.268115

O -4.091672 -0.122352 0.874456

C -3.345450 1.097699 1.069177

C -2.560397 1.407955 -0.206257

C -3.490999 1.821549 -1.347210

H -4.289021 1.077312 -1.490855

H -3.965648 2.794234 -1.133824

H -2.929292 1.906299 -2.288788

H -2.078705 0.463103 -0.499625

C -1.440423 2.433618 0.010406

C -0.395177 2.041555 1.068382

C 0.901539 2.785005 0.888521

C 2.141334 2.369946 1.206686

C 3.335519 3.256414 0.951897

H 4.077078 2.770840 0.293982

H 3.865660 3.481830 1.894037

H 3.043151 4.206784 0.482578

C 2.440315 1.059360 1.904994

H 2.967218 1.315921 2.841108

C 3.334500 0.051735 1.149457

H 3.897277 -0.537290 1.888285

H 4.100702 0.592888 0.571620

C 2.639146 -0.969555 0.204981

C 1.828518 -0.267673 -0.854765

C 0.553939 -0.557960 -1.169175

C 0.140930 0.274735 -2.304330

O -0.919284 0.280560 -2.899413

O 1.174176 1.086241 -2.640026

C 2.304058 0.803302 -1.797292

H 2.597385 1.729832 -1.285522

H 3.138768 0.470396 -2.434266

C -0.299638 -1.583291 -0.488760

C 0.625377 -2.611926 0.146545

H 0.032522 -3.300924 0.767501

H 1.095087 -3.210288 -0.652377

C 1.690437 -1.923284 1.019614

C 2.440056 -2.957928 1.862709

H 1.739146 -3.459708 2.547154

H 3.231357 -2.502908 2.477009

H 2.901573 -3.736593 1.236421

H 1.135186 -1.278281 1.720423

H -0.858018 -1.090558 0.327492

O -1.218405 -2.200177 -1.380770

H -1.543666 -1.507476 -1.981751

C 3.749238 -1.768089 -0.519511

H 4.348091 -1.109634 -1.165729

H 3.324288 -2.564369 -1.148002

H 4.435565 -2.225810 0.206544

H 1.508463 0.573080 2.222856

H 0.806814 3.784939 0.445482

H -0.220013 0.956988 1.024430

H -0.799698 2.236925 2.078688

H -0.932344 2.572263 -0.958451

H -1.872962 3.418932 0.261828

H -4.089811 1.877327 1.286348

H -2.687938 0.971562 1.936942

C -4.226815 -2.475922 0.724600

H -5.269206 -2.256825 0.462788

H -3.680036 -2.772627 -0.186151

H -4.165234 -3.303216 1.443482

5-c20,  $\Delta G = 2.3613$  kcal/mol, population = 0.59 %

O 4.546839 -1.311339 -0.061975

C 3.537291 -1.176902 0.593758

O 2.424592 -0.587783 0.114375

C 2.472009 -0.088630 -1.233752

C 3.075542 1.317774 -1.326105

C 3.506006 1.583138 -2.773030

H 2.643275 1.521658 -3.457995

H 3.939769 2.589586 -2.875398

H 4.257576 0.851934 -3.109518

H 3.979036 1.324316 -0.691939

C 2.115429 2.415585 -0.844989

C 1.648567 2.323958 0.618731

C 0.654721 3.403568 0.972445

C -0.655657 3.395737 0.663879

C -1.561018 4.547170 1.015753

H -1.007540 5.369111 1.493121

H -2.365924 4.234597 1.703060

H -2.061119 4.942879 0.113822

C -1.301001 2.246778 -0.075503

H -1.621945 2.603532 -1.070351

|   |           |           |           |   |           |           |           |
|---|-----------|-----------|-----------|---|-----------|-----------|-----------|
| C | -2.506206 | 1.623641  | 0.648889  | O | -1.610698 | -1.490065 | -2.289704 |
| H | -3.419565 | 2.203996  | 0.449566  | C | -2.494385 | -0.663281 | -2.390854 |
| H | -2.353028 | 1.683715  | 1.739416  | O | -3.519361 | -0.574741 | -1.537705 |
| C | -2.764017 | 0.137497  | 0.291315  | C | -3.563522 | -1.474189 | -0.413841 |
| C | -1.590850 | -0.691867 | 0.751265  | C | -4.473567 | -0.869757 | 0.649089  |
| C | -1.002320 | -1.665361 | 0.036793  | C | -4.674624 | -1.871822 | 1.789697  |
| C | 0.036658  | -2.299603 | 0.858579  | H | -3.717925 | -2.159242 | 2.254581  |
| O | 0.745935  | -3.248942 | 0.593825  | H | -5.312853 | -1.441738 | 2.577115  |
| O | 0.075876  | -1.665872 | 2.059216  | H | -5.157648 | -2.793416 | 1.428599  |
| C | -0.901137 | -0.615942 | 2.085061  | H | -5.452347 | -0.704208 | 0.165466  |
| H | -0.384556 | 0.344770  | 2.242007  | C | -3.975730 | 0.506795  | 1.125226  |
| H | -1.579525 | -0.785210 | 2.935991  | C | -2.696360 | 0.503341  | 1.979026  |
| C | -1.369109 | -2.087281 | -1.353748 | C | -2.204527 | 1.901704  | 2.227161  |
| C | -2.764805 | -1.551640 | -1.662335 | C | -0.972415 | 2.387398  | 1.998126  |
| H | -2.974746 | -1.664471 | -2.737035 | C | -0.642294 | 3.839432  | 2.228531  |
| H | -3.491905 | -2.182885 | -1.124739 | H | -0.238211 | 4.300595  | 1.309627  |
| C | -2.920956 | -0.074794 | -1.254062 | H | 0.141944  | 3.949658  | 2.998265  |
| C | -4.214756 | 0.514862  | -1.817257 | H | -1.522160 | 4.419392  | 2.543828  |
| H | -5.097667 | -0.055821 | -1.490522 | C | 0.169341  | 1.546943  | 1.461326  |
| H | -4.194527 | 0.489631  | -2.917530 | H | 1.116033  | 1.981850  | 1.816397  |
| H | -4.356246 | 1.562477  | -1.511442 | C | 0.173855  | 1.480434  | -0.074333 |
| H | -2.082242 | 0.464738  | -1.724273 | H | 0.044810  | 2.493967  | -0.483742 |
| H | -0.642844 | -1.628688 | -2.058286 | H | -0.714177 | 0.917415  | -0.405283 |
| O | -1.352571 | -3.498205 | -1.492791 | C | 1.430039  | 0.850466  | -0.732672 |
| H | -0.516731 | -3.808318 | -1.106077 | C | 1.669528  | -0.530654 | -0.175623 |
| C | -4.013525 | -0.336428 | 1.068157  | C | 2.862821  | -1.005997 | 0.219629  |
| H | -3.849293 | -0.262128 | 2.153481  | C | 2.706565  | -2.403629 | 0.642578  |
| H | -4.263894 | -1.381407 | 0.836093  | O | 3.553240  | -3.181523 | 1.032886  |
| H | -4.881246 | 0.292353  | 0.823261  | O | 1.399359  | -2.746524 | 0.507173  |
| H | -0.554396 | 1.464411  | -0.267299 | C | 0.656110  | -1.627637 | -0.002581 |
| H | 1.052722  | 4.289629  | 1.481819  | H | -0.128533 | -1.371080 | 0.726946  |
| H | 2.527103  | 2.394262  | 1.281163  | H | 0.156232  | -1.915664 | -0.938989 |
| H | 1.221467  | 1.327828  | 0.800829  | C | 4.164511  | -0.263685 | 0.202513  |
| H | 2.593515  | 3.397557  | -1.002089 | C | 4.013592  | 0.936060  | -0.727008 |
| H | 1.227410  | 2.408713  | -1.501997 | H | 4.878391  | 1.606922  | -0.609329 |
| H | 3.051749  | -0.793826 | -1.844712 | H | 4.035687  | 0.561558  | -1.764218 |
| H | 1.427079  | -0.093410 | -1.578331 | C | 2.711919  | 1.713534  | -0.460692 |
| C | 3.347650  | -1.654632 | 2.005556  | C | 2.720228  | 3.045371  | -1.214884 |
| H | 2.696755  | -2.542054 | 1.984381  | H | 2.858429  | 2.897851  | -2.297004 |
| H | 4.320144  | -1.912339 | 2.441479  | H | 3.551342  | 3.673700  | -0.859697 |
| H | 2.835656  | -0.892834 | 2.608626  | H | 1.790176  | 3.613889  | -1.066170 |
|   |           |           |           | H | 2.705764  | 1.947143  | 0.616779  |
|   |           |           |           | H | 4.373183  | 0.100568  | 1.230752  |
|   |           |           |           | O | 5.228109  | -1.089422 | -0.243971 |

5-c19,  $\Delta G = 2.4674$  kcal/mol, population = 0.50 %

H 5.160673 -1.922906 0.251298  
C 1.155191 0.709092 -2.248293  
H 0.843297 1.673247 -2.675306  
H 0.351036 -0.015931 -2.432768  
H 2.050429 0.365398 -2.786415  
H 0.130750 0.529998 1.879670  
H -2.963456 2.597243 2.609229  
H -1.915607 -0.097897 1.490242  
H -2.906719 0.005297 2.942724  
H -3.810133 1.140411 0.239161  
H -4.782873 0.990531 1.701702  
H -3.948125 -2.446633 -0.760430  
H -2.542261 -1.636453 -0.041251  
C -2.551643 0.409675 -3.443887  
H -2.103729 1.327618 -3.029562  
H -1.969544 0.102192 -4.320936  
H -3.589066 0.636570 -3.722429

5-c16,  $\Delta G = 2.4762$  kcal/mol, population = 0.49 %

O -2.095972 0.193066 1.913527  
C -2.925982 1.064804 1.755144  
O -4.157568 0.847532 1.280412  
C -4.544370 -0.482250 0.872791  
C -4.702251 -0.552362 -0.646559  
C -5.732151 0.468832 -1.140684  
H -5.912006 0.352337 -2.220404  
H -6.695741 0.350614 -0.619700  
H -5.377687 1.496230 -0.963851  
H -5.095625 -1.565936 -0.847881  
C -3.367727 -0.410496 -1.394854  
C -2.405822 -1.591246 -1.220284  
C -1.139319 -1.437179 -2.020896  
C 0.084249 -1.896243 -1.701341  
C 1.242211 -1.732689 -2.652042  
H 0.961595 -1.151601 -3.542903  
H 1.612206 -2.718831 -2.985034  
H 2.095060 -1.228382 -2.172738  
C 0.357782 -2.663783 -0.417859  
H -0.445950 -3.403733 -0.270319  
C 0.441942 -1.851156 0.888294  
H 0.501834 -2.574709 1.716834  
H -0.500220 -1.308741 1.048638  
C 1.604332 -0.839543 1.082852

C 1.464262 0.356638 0.174354  
C 2.474323 0.925813 -0.506516  
C 1.972353 2.112616 -1.208975  
O 2.578851 2.896412 -1.911492  
O 0.649816 2.244111 -0.933183  
C 0.234758 1.190666 -0.047364  
H -0.581231 0.631107 -0.521869  
H -0.142074 1.635671 0.884378  
C 3.901096 0.468074 -0.530989  
C 4.125608 -0.447146 0.668777  
H 5.097527 -0.954828 0.571235  
H 4.181617 0.186967 1.569275  
C 3.003474 -1.491083 0.810872  
C 3.388122 -2.560612 1.835402  
H 4.290874 -3.095100 1.501739  
H 2.592785 -3.308028 1.973983  
H 3.612317 -2.119064 2.818703  
H 2.922582 -1.993853 -0.166411  
H 4.071321 -0.111781 -1.463458  
O 4.798877 1.564962 -0.477909  
H 4.489277 2.209800 -1.136093  
C 1.488616 -0.306838 2.533729  
H 1.570537 -1.132289 3.254852  
H 0.508637 0.167886 2.685210  
H 2.271814 0.431529 2.758523  
H 1.277450 -3.256041 -0.543285  
H -1.253138 -0.920469 -2.982824  
H -2.930481 -2.511516 -1.545103  
H -2.177043 -1.736128 -0.155642  
H -3.584303 -0.289308 -2.469806  
H -2.874567 0.529229 -1.087770  
H -3.803328 -1.199197 1.246777  
H -5.508079 -0.673537 1.366222  
C -2.692419 2.526160 2.028933  
H -1.894715 2.644392 2.772382  
H -2.373401 3.009971 1.091066  
H -3.614087 3.019562 2.363750

5-c4,  $\Delta G = 2.5684$  kcal/mol, population = 0.42 %

O -1.667733 -0.894812 1.827114  
C -2.664207 -1.438599 1.395974  
O -3.705824 -0.763536 0.887405  
C -3.586958 0.673693 0.830736

C -2.778881 1.109807 -0.392051  
C -3.541624 0.846227 -1.689376  
H -2.909760 1.060219 -2.564054  
H -3.851071 -0.207833 -1.751898  
H -4.445420 1.475815 -1.750747  
H -1.871040 0.489137 -0.393267  
C -2.299505 2.563890 -0.273163  
C -1.375535 2.794435 0.948451  
C -0.239336 3.744949 0.693480  
C 1.074634 3.450921 0.643193  
C 2.105031 4.529293 0.422724  
H 2.835069 4.546998 1.251834  
H 1.643192 5.524817 0.349917  
H 2.688519 4.356191 -0.497489  
C 1.618293 2.052325 0.838971  
H 2.112246 1.998833 1.825875  
C 2.618516 1.599994 -0.242243  
H 3.634691 1.940184 0.008471  
H 2.377190 2.087706 -1.201157  
C 2.648333 0.068458 -0.489796  
C 1.313536 -0.361991 -1.042539  
C 0.599200 -1.416312 -0.614527  
C -0.601354 -1.546831 -1.448296  
O -1.483071 -2.381291 -1.394436  
O -0.595440 -0.547601 -2.368749  
C 0.564381 0.276878 -2.178355  
H 0.232516 1.301830 -1.946579  
H 1.136443 0.304055 -3.118669  
C 0.973489 -2.329945 0.511928  
C 2.478106 -2.206570 0.732982  
H 2.760827 -2.738629 1.654519  
H 2.994185 -2.708882 -0.102560  
C 2.909244 -0.730309 0.835408  
C 4.348411 -0.609947 1.339106  
H 4.680555 0.438297 1.386966  
H 5.052628 -1.159624 0.695900  
H 4.430083 -1.031249 2.352811  
H 2.257604 -0.276711 1.599645  
H 0.441360 -1.979677 1.416386  
O 0.615364 -3.679948 0.239128  
H -0.252984 -3.659568 -0.196706  
C 3.720638 -0.231382 -1.561990  
H 4.703667 0.138928 -1.239235  
H 3.475684 0.268328 -2.511012

H 3.802319 -1.310101 -1.759881  
H 0.786311 1.336758 0.880617  
H -0.527232 4.792431 0.533606  
H -0.989106 1.821170 1.282226  
H -1.974790 3.179527 1.791964  
H -1.750887 2.807269 -1.198246  
H -3.164314 3.250264 -0.246564  
H -4.620285 1.045557 0.779405  
H -3.125867 1.021339 1.763621  
C -2.900277 -2.924274 1.402761  
H -3.468410 -3.231840 0.516401  
H -1.937700 -3.447872 1.439441  
H -3.484568 -3.187607 2.299423

5-c9,  $\Delta G = 2.6519$  kcal/mol, population = 0.36 %

O 1.187195 1.355912 -0.225995  
C 1.731323 2.084295 0.578830  
O 2.686196 1.657065 1.419210  
C 3.037408 0.263085 1.335639  
C 4.061275 -0.021194 0.230189  
C 5.469658 0.386666 0.663823  
H 5.490471 1.436393 0.997095  
H 5.819412 -0.240854 1.501114  
H 6.188452 0.277670 -0.163372  
H 3.776069 0.584386 -0.646871  
C 3.955035 -1.501580 -0.170800  
C 2.714512 -1.778775 -1.057521  
C 2.097841 -3.126683 -0.820936  
C 0.893009 -3.394230 -0.282000  
C 0.442959 -4.817709 -0.064582  
H 1.237377 -5.537559 -0.310346  
H -0.438691 -5.064057 -0.680747  
H 0.141066 -4.978619 0.985662  
C -0.090579 -2.330333 0.155361  
H -0.234443 -2.421846 1.246782  
C -1.456875 -2.444466 -0.539823  
H -2.000565 -3.322215 -0.159463  
H -1.298055 -2.642511 -1.613583  
C -2.378813 -1.205417 -0.416044  
C -1.762927 -0.023959 -1.123503  
C -1.777642 1.237573 -0.667610  
C -1.153117 2.114721 -1.663602  
O -1.026568 3.323729 -1.643847



O -0.750823 1.353364 -2.711602  
C -1.059232 -0.024188 -2.451711  
H -0.117276 -0.595508 -2.423847  
H -1.675236 -0.411700 -3.278589  
C -2.308098 1.696931 0.653242  
C -3.228236 0.614188 1.209082  
H -3.451350 0.824111 2.266575  
H -4.184085 0.671671 0.662627  
C -2.610370 -0.791078 1.077848  
C -3.416958 -1.818186 1.873917  
H -4.467406 -1.851887 1.545967  
H -3.413984 -1.556309 2.943184  
H -3.000545 -2.832324 1.779610  
H -1.608662 -0.731146 1.535275  
H -1.440958 1.818813 1.337005  
O -3.010585 2.925032 0.541475  
H -2.454486 3.511918 0.001978  
C -3.709086 -1.537141 -1.132937  
H -4.428539 -0.709390 -1.058447  
H -4.167151 -2.438090 -0.700368  
H -3.534838 -1.735242 -2.201236  
H 0.321299 -1.325820 -0.013289  
H 2.732674 -3.984614 -1.079988  
H 3.018364 -1.689291 -2.115693  
H 1.975695 -0.982682 -0.894799  
H 4.874034 -1.813149 -0.693150  
H 3.906778 -2.116094 0.746177  
H 3.454857 0.012312 2.321202  
H 2.118641 -0.317607 1.184199  
C 1.415391 3.540590 0.775095  
H 0.677697 3.859196 0.030117  
H 1.013534 3.690302 1.789374  
H 2.334607 4.139818 0.695959

5-c24,  $\Delta G = 2.6707$  kcal/mol, population = 0.35 %

O -1.589514 1.286098 1.532216  
C -2.649286 1.756134 1.892986  
O -3.671317 2.003831 1.065052  
C -3.555107 1.621202 -0.319431  
C -4.228914 0.274438 -0.580884  
C -5.724855 0.339867 -0.265567  
H -6.190222 -0.653163 -0.364102  
H -5.900589 0.700890 0.758865

H -6.240566 1.025051 -0.959879  
H -3.761045 -0.467928 0.089758  
C -3.964969 -0.163760 -2.032252  
C -2.581382 -0.802652 -2.257432  
C -2.481481 -2.177169 -1.657540  
C -1.733988 -2.586645 -0.616391  
C -1.784010 -4.019876 -0.148005  
H -2.496207 -4.617996 -0.735031  
H -2.077992 -4.073751 0.915037  
H -0.795232 -4.504833 -0.219283  
C -0.800925 -1.683253 0.159089  
H -1.041012 -0.630438 -0.024930  
C 0.681147 -1.971872 -0.132697  
H 0.855565 -1.921554 -1.220834  
H 0.890101 -3.012571 0.153775  
C 1.729307 -1.065246 0.577474  
C 1.893744 0.226424 -0.188863  
C 3.072007 0.760932 -0.556717  
C 2.831139 2.036772 -1.241311  
O 3.638676 2.827073 -1.687296  
O 1.491587 2.247251 -1.292573  
C 0.807121 1.149032 -0.667985  
H 0.159695 0.674416 -1.422283  
H 0.164759 1.530013 0.139157  
C 4.431937 0.186804 -0.305342  
C 4.307285 -0.861447 0.792470  
H 5.239217 -1.443583 0.858849  
H 4.192987 -0.328510 1.751423  
C 3.115826 -1.808378 0.564637  
C 3.189534 -2.974854 1.554201  
H 3.240190 -2.616339 2.593823  
H 4.096604 -3.569808 1.367179  
H 2.327285 -3.653143 1.474215  
H 3.220604 -2.224486 -0.454085  
H 4.779707 -0.305402 -1.238347  
O 5.357544 1.188710 0.086187  
H 5.261186 1.918341 -0.548641  
C 1.292831 -0.721161 2.019492  
H 2.101293 -0.203181 2.555882  
H 1.040054 -1.633703 2.578382  
H 0.410920 -0.067291 2.027950  
H -0.988201 -1.840376 1.233608  
H -3.134402 -2.923301 -2.129885  
H -1.793890 -0.140068 -1.869898

H -2.406595 -0.876037 -3.344990  
H -4.739246 -0.890116 -2.331710  
H -4.090159 0.703796 -2.704335  
H -4.061280 2.418342 -0.883878  
H -2.494329 1.606031 -0.598914  
C -2.990974 2.110478 3.314107  
H -3.560042 3.049232 3.355210  
H -3.628793 1.314878 3.732109  
H -2.074494 2.184290 3.911420

5-c23,  $\Delta G = 2.8464$  kcal/mol, population = 0.26 %

O 2.602837 2.537297 0.239739  
C 2.850895 2.162179 -0.885733  
O 3.529502 1.039327 -1.167489  
C 3.980774 0.215988 -0.073164  
C 3.894590 -1.250932 -0.482366  
C 4.862710 -1.558464 -1.628226  
H 5.908279 -1.451861 -1.292492  
H 4.729142 -2.588238 -1.994704  
H 4.706335 -0.870029 -2.472124  
H 2.866154 -1.426846 -0.845696  
C 4.130936 -2.174205 0.727599  
C 2.917031 -2.381661 1.657457  
C 2.500023 -1.164598 2.434666  
C 1.346000 -0.478115 2.350164  
C 1.129032 0.777751 3.155206  
H 1.027882 1.653685 2.490886  
H 1.968448 0.976287 3.837671  
H 0.202248 0.716072 3.751740  
C 0.215061 -0.849317 1.416510  
H 0.256372 -1.918831 1.169889  
C 0.217819 -0.022472 0.120194  
H 1.069921 -0.329342 -0.502375  
H 0.403556 1.036727 0.354790  
C -1.072899 -0.107262 -0.731655  
C -2.230154 0.460295 0.048362  
C -3.454369 -0.087124 0.119875  
C -4.321146 0.783035 0.926249  
O -5.496772 0.652674 1.194883  
O -3.584643 1.847051 1.346075  
C -2.244244 1.734980 0.845669  
H -1.547961 1.715653 1.698845  
H -2.015841 2.625434 0.238247

C -3.894948 -1.362240 -0.533884  
C -2.877622 -1.726123 -1.612209  
H -3.055361 -2.756851 -1.955207  
H -3.052977 -1.064791 -2.477060  
C -1.430125 -1.586569 -1.105200  
C -0.439042 -2.220665 -2.082568  
H 0.601533 -2.116162 -1.739877  
H -0.511584 -1.772223 -3.085277  
H -0.646183 -3.296664 -2.186785  
H -1.376369 -2.160161 -0.165259  
H -3.905257 -2.162201 0.236173  
O -5.183423 -1.230964 -1.112881  
H -5.758189 -0.844344 -0.431859  
C -0.870793 0.767397 -1.989992  
H 0.016254 0.435758 -2.548055  
H -0.714919 1.820249 -1.712557  
H -1.740525 0.720292 -2.660435  
H -0.742783 -0.695300 1.944480  
H 3.259555 -0.785460 3.131433  
H 3.186005 -3.179792 2.373042  
H 2.079903 -2.773630 1.059213  
H 4.433167 -3.164204 0.348865  
H 4.992355 -1.802024 1.312340  
H 5.024325 0.493722 0.153562  
H 3.366406 0.431825 0.805633  
C 2.432033 2.871865 -2.145858  
H 3.310677 3.070627 -2.777124  
H 1.753396 2.225720 -2.722390  
H 1.925219 3.810493 -1.894200

5-c7,  $\Delta G = 3.0158$  kcal/mol, population = 0.20 %

O 0.946033 1.685130 0.383253  
C 1.868456 2.097957 -0.289905  
O 3.158924 1.899922 0.010865  
C 3.518973 1.216826 1.227455  
C 4.437469 0.028922 0.936860  
C 5.285083 -0.269315 2.179923  
H 5.904257 0.595889 2.464360  
H 4.644526 -0.524003 3.041189  
H 5.955124 -1.123768 2.000480  
H 5.114302 0.340740 0.120908  
C 3.685420 -1.236800 0.498579  
C 2.827585 -1.142020 -0.775922

C 2.281142 -2.493414 -1.149508  
C 1.077743 -3.002769 -0.826353  
C 0.724082 -4.427654 -1.172801  
H 1.575683 -4.956652 -1.624832  
H -0.122523 -4.482141 -1.877694  
H 0.411228 -4.983468 -0.270869  
C 0.025449 -2.225207 -0.064314  
H 0.016758 -2.588214 0.979502  
C -1.389473 -2.362479 -0.646732  
H -1.799739 -3.354916 -0.407436  
H -1.337328 -2.328064 -1.748110  
C -2.404399 -1.285251 -0.191165  
C -1.991859 0.063527 -0.723649  
C -2.065467 1.215835 -0.040630  
C -1.643029 2.317282 -0.911198  
O -1.605788 3.508360 -0.679515  
O -1.306553 1.797781 -2.122811  
C -1.461680 0.371942 -2.095533  
H -0.478334 -0.091237 -2.278865  
H -2.140498 0.072553 -2.909764  
C -2.463779 1.370724 1.392636  
C -3.205275 0.110602 1.829329  
H -3.309746 0.104139 2.925312  
H -4.224599 0.157165 1.411329  
C -2.487259 -1.172801 1.369702  
C -3.097067 -2.407549 2.035078  
H -4.173860 -2.493827 1.822273  
H -2.981664 -2.345043 3.128128  
H -2.611565 -3.337565 1.702924  
H -1.446677 -1.086684 1.724076  
H -1.529666 1.468322 1.984458  
O -3.286361 2.510400 1.592220  
H -2.844078 3.251464 1.145960  
C -3.775396 -1.632019 -0.817788  
H -4.552660 -0.916597 -0.514194  
H -4.094163 -2.641646 -0.521265  
H -3.714126 -1.615125 -1.916397  
H 0.302803 -1.162366 -0.007348  
H 2.985085 -3.157468 -1.667701  
H 3.444394 -0.744719 -1.600207  
H 2.008012 -0.429298 -0.619611  
H 4.426996 -2.042270 0.359089  
H 3.037206 -1.567784 1.330303  
H 4.043517 1.963122 1.843033

H 2.605992 0.905452 1.754260  
C 1.710072 2.858159 -1.578033  
H 2.639292 3.366674 -1.861348  
H 1.430505 2.146248 -2.369851  
H 0.881518 3.570969 -1.476140

5-c26,  $\Delta G = 3.0698$  kcal/mol, population = 0.18 %

O -1.774704 -1.513623 -1.808172  
C -2.683900 -2.171164 -1.343282  
O -3.881784 -1.668036 -1.017029  
C -4.104604 -0.246067 -1.140358  
C -4.140836 0.418946 0.235137  
C -5.394867 0.032305 1.024118  
H -5.431739 -1.057986 1.179127  
H -5.409447 0.514773 2.013335  
H -6.311417 0.331522 0.491397  
H -4.176884 1.502263 0.022199  
C -2.850723 0.130199 1.022474  
C -2.505790 1.169740 2.103704  
C -2.238044 2.545734 1.543462  
C -1.105041 2.957341 0.944105  
C -0.973473 4.354839 0.394786  
H -0.719834 4.341856 -0.679267  
H -0.154209 4.898326 0.898000  
H -1.900416 4.933589 0.518715  
C 0.112326 2.075909 0.762975  
H 1.007385 2.672277 1.004547  
C 0.239636 1.524502 -0.667787  
H 0.171368 2.353427 -1.388059  
H -0.624884 0.878582 -0.885476  
C 1.527452 0.720957 -0.988334  
C 1.677875 -0.437749 -0.034579  
C 2.820906 -0.784954 0.581726  
C 2.593178 -2.006966 1.363623  
O 3.382938 -2.644245 2.030531  
O 1.294514 -2.374277 1.212472  
C 0.626844 -1.442826 0.346154  
H -0.215860 -0.999235 0.896887  
H 0.211290 -1.980249 -0.519059  
C 4.141504 -0.085892 0.465003  
C 4.104509 0.787786 -0.784377  
H 4.977457 1.458465 -0.793601  
H 4.198470 0.124740 -1.660752

C 2.810073 1.616573 -0.869869  
C 2.920574 2.672183 -1.972313  
H 3.737922 3.372520 -1.741735  
H 1.998586 3.263392 -2.075182  
H 3.143172 2.216999 -2.949641  
H 2.722556 2.153628 0.089368  
H 4.275110 0.563694 1.355870  
O 5.213108 -1.011092 0.375259  
H 5.076708 -1.665334 1.080971  
C 1.364371 0.135657 -2.411658  
H 1.168331 0.939122 -3.136091  
H 0.511305 -0.556371 -2.446177  
H 2.265980 -0.407199 -2.730616  
H 0.095725 1.243101 1.481578  
H -3.061858 3.266223 1.607126  
H -1.626766 0.803901 2.660565  
H -3.325476 1.227513 2.837875  
H -2.923197 -0.870779 1.481527  
H -2.010879 0.085873 0.316841  
H -3.309667 0.181116 -1.764873  
H -5.068931 -0.138341 -1.657653  
C -2.592535 -3.637227 -1.019523  
H -3.569772 -4.129236 -1.105850  
H -1.852745 -4.116653 -1.672488  
H -2.250659 -3.737369 0.023999

5-c2,  $\Delta G = 3.4745$  kcal/mol, population = 0.09 %

O 1.177131 1.314271 1.417107  
C 2.019289 2.183910 1.333117  
O 3.336995 1.925915 1.298434  
C 3.724504 0.538235 1.271246  
C 3.930462 0.041245 -0.168472  
C 5.356654 0.315774 -0.648711  
H 5.616592 1.378776 -0.521364  
H 6.084888 -0.281636 -0.074475  
H 5.475129 0.061045 -1.713508  
H 3.238325 0.620320 -0.804762  
C 3.525384 -1.439184 -0.280607  
C 2.006310 -1.592878 -0.443210  
C 1.508949 -3.007282 -0.326208  
C 0.349312 -3.429098 0.214657  
C -0.001231 -4.893952 0.269771  
H 0.789119 -5.523491 -0.164833

H -0.941293 -5.103561 -0.269430  
H -0.166834 -5.215434 1.313522  
C -0.696065 -2.495613 0.783149  
H -0.908550 -2.785488 1.826630  
C -2.019641 -2.500034 -0.023647  
H -2.758413 -3.164139 0.449590  
H -1.841520 -2.927769 -1.023755  
C -2.665344 -1.102466 -0.222073  
C -1.669189 -0.219744 -0.929035  
C -1.303373 1.010689 -0.534772  
C -0.287153 1.524423 -1.462587  
O 0.280345 2.597398 -1.465360  
O -0.055440 0.575704 -2.410820  
C -0.899718 -0.561206 -2.173349  
H -0.269251 -1.455471 -2.060368  
H -1.549320 -0.706368 -3.051394  
C -1.837922 1.740027 0.658973  
C -3.160695 1.092298 1.052061  
H -3.499266 1.499634 2.017462  
H -3.921787 1.363819 0.300702  
C -3.018386 -0.438705 1.155051  
C -4.242662 -1.059200 1.829998  
H -5.173746 -0.798832 1.303485  
H -4.333168 -0.687703 2.862290  
H -4.175360 -2.156694 1.876949  
H -2.153195 -0.623506 1.813820  
H -1.110038 1.611918 1.479160  
O -2.018533 3.125394 0.387688  
H -1.217644 3.424163 -0.073538  
C -3.910709 -1.258680 -1.121441  
H -3.629135 -1.621836 -2.121078  
H -4.438753 -0.301977 -1.246865  
H -4.611455 -1.988506 -0.691972  
H -0.296138 -1.473825 0.827550  
H 2.177488 -3.774562 -0.739100  
H 1.752890 -1.181904 -1.438019  
H 1.493931 -0.935629 0.274863  
H 4.033819 -1.901764 -1.143440  
H 3.876816 -1.991953 0.609613  
H 4.660832 0.482686 1.844709  
H 2.955479 -0.046383 1.790405  
C 1.727512 3.653514 1.223169  
H 2.460708 4.248252 1.784233  
H 1.791777 3.928378 0.159172

H 0.706583 3.855931 1.569014

5-c15,  $\Delta G = 3.6797$  kcal/mol, population = 0.06 %

O -1.571022 1.728761 0.634913  
C -2.090712 2.398851 -0.236198  
O -3.053303 1.935734 -1.037561  
C -3.460311 0.557976 -0.865897  
C -4.368381 0.360406 0.347541  
C -5.604405 1.260773 0.261861  
H -6.222575 1.166143 1.168137  
H -5.323849 2.318560 0.149720  
H -6.230039 0.984420 -0.603943  
H -3.784791 0.646455 1.238158  
C -4.775097 -1.113099 0.519284  
C -3.634416 -2.119225 0.765695  
C -2.932249 -2.584110 -0.482430  
C -1.618191 -2.796150 -0.673097  
C -1.095655 -3.284231 -2.000675  
H -0.333807 -2.597176 -2.408418  
H -1.896790 -3.384431 -2.747509  
H -0.598403 -4.264175 -1.890543  
C -0.557882 -2.551762 0.379991  
H -0.985614 -2.618887 1.389753  
C 0.124962 -1.184748 0.195220  
H -0.573512 -0.397027 0.511209  
H 0.304678 -1.004402 -0.874421  
C 1.467274 -0.986670 0.966023  
C 1.890479 0.439053 0.732087  
C 2.720229 0.832988 -0.250544  
C 2.923767 2.284377 -0.148778  
O 3.648251 3.004635 -0.801915  
O 2.150087 2.750960 0.870791  
C 1.468171 1.653436 1.503633  
H 0.382538 1.829476 1.452972  
H 1.779821 1.610056 2.559858  
C 3.434423 -0.052842 -1.224853  
C 2.963085 -1.503483 -1.057384  
H 2.093705 -1.659919 -1.712407  
H 3.758645 -2.161281 -1.439203  
C 2.601513 -1.902115 0.388566  
C 3.850830 -1.948199 1.278600  
H 4.283756 -0.947657 1.423627  
H 4.625398 -2.570974 0.805155

H 3.635324 -2.382001 2.265314

H 2.195686 -2.925489 0.345307

H 3.198243 0.282315 -2.253420

O 4.846378 0.023066 -1.023840

H 5.089881 0.958281 -1.101423

C 1.229828 -1.237847 2.465612

H 1.071614 -2.308132 2.661829

H 0.334894 -0.696900 2.810890

H 2.080777 -0.907780 3.077277

H 0.190293 -3.358163 0.306038

H -3.601748 -2.795091 -1.327137

H -4.080150 -3.004846 1.256554

H -2.922259 -1.698969 1.493460

H -5.467836 -1.155890 1.375342

H -5.364857 -1.435614 -0.358819

H -3.992344 0.310972 -1.795802

H -2.560952 -0.064484 -0.799075

C -1.745624 3.836060 -0.515863

H -0.687880 4.007358 -0.276391

H -1.959288 4.104986 -1.557983

H -2.355100 4.478267 0.140564

Coordinates of the dominating conformers of **6**

6-c19,  $\Delta G = 0.0000$  kcal/mol, population = 22.83 %

O 0.476218 -1.825321 -0.300020

C -0.679021 -1.666118 0.428986

C -1.360159 -0.313659 0.252224

C -2.549941 -0.515571 -0.332399

C -2.749380 -1.961983 -0.526560

O -3.717649 -2.535891 -0.978917

O -1.658778 -2.615093 -0.062298

C -3.565550 0.529327 -0.686354

C -3.259166 1.786161 0.121745

H -3.843474 2.630995 -0.273922

H -3.605456 1.612931 1.154183

C -1.760200 2.135623 0.101536

C -1.524908 3.531175 0.682480

H -0.460459 3.808144 0.681240

H -1.894999 3.609303 1.716524

H -2.062145 4.282932 0.084081

H -1.465726 2.168778 -0.960495

C -0.872743 1.022614 0.761381  
C -1.044251 0.998151 2.301164  
H -0.472362 0.168313 2.742464  
H -2.096804 0.874995 2.592493  
H -0.665143 1.929525 2.745405  
C 0.635157 1.248427 0.478984  
H 0.931722 2.177829 0.988395  
C 1.065119 1.312343 -0.994515  
C 2.533317 1.654664 -1.140117  
C 3.503484 0.753498 -1.381256  
C 3.353895 -0.732319 -1.549089  
C 4.162032 -1.535336 -0.501432  
C 3.704585 -1.253794 0.914963  
O 2.581479 -1.568335 1.294808  
C 4.653238 -0.540890 1.831334  
H 5.607851 -1.087867 1.892751  
H 4.882369 0.444808 1.391069  
H 4.215503 -0.414881 2.829532  
H 4.023011 -2.613654 -0.685025  
H 5.234780 -1.312711 -0.599960  
H 3.732752 -1.033819 -2.541310  
H 2.300933 -1.035818 -1.505245  
H 4.533326 1.126925 -1.457233  
C 2.864677 3.118010 -0.986002  
H 2.508338 3.510403 -0.018074  
H 3.946371 3.305160 -1.051844  
H 2.360249 3.715898 -1.765404  
H 0.484765 2.089435 -1.517674  
H 0.824893 0.355656 -1.476258  
H 1.204132 0.449257 0.974578  
H -3.461325 0.760913 -1.767591  
O -4.885232 0.090915 -0.408134  
H -4.966733 -0.804999 -0.776303  
H -0.521247 -1.900149 1.496271  
H 1.258576 -1.884777 0.299915

6-c1,  $\Delta G = 0.1029$  kcal/mol, population = 19.18 %

O 0.652164 -1.266021 1.736517  
C -0.704409 -1.219386 1.561918  
C -1.298521 -0.161932 0.633448  
C -2.071604 -0.787440 -0.267663  
C -1.997610 -2.242267 -0.046961  
O -2.567589 -3.126140 -0.652210

O -1.184307 -2.478516 1.006278  
C -2.966860 -0.136232 -1.279808  
C -3.259707 1.276125 -0.786826  
H -3.793687 1.837937 -1.568591  
H -3.940649 1.195739 0.077405  
C -1.973664 2.021005 -0.397091  
C -2.268611 3.504505 -0.160063  
H -1.374777 4.061886 0.156973  
H -3.047120 3.647097 0.605020  
H -2.633093 3.966935 -1.090144  
H -1.307813 1.960533 -1.273027  
C -1.198304 1.340026 0.790945  
C -1.821074 1.708964 2.157232  
H -1.322494 1.166919 2.974176  
H -2.893528 1.465894 2.191962  
H -1.701566 2.782467 2.359321  
C 0.284100 1.805753 0.799711  
H 0.293357 2.904725 0.870010  
C 1.119604 1.353439 -0.404842  
C 2.507327 1.960482 -0.439038  
C 3.568818 1.433225 0.197107  
C 3.593217 0.196983 1.057670  
C 4.194970 -1.031310 0.351764  
C 3.294062 -1.648197 -0.700675  
O 2.095900 -1.816484 -0.505437  
C 3.926801 -2.068464 -1.995006  
H 4.274978 -1.163380 -2.521951  
H 4.820899 -2.682822 -1.802211  
H 3.210463 -2.613355 -2.622562  
H 5.174487 -0.791432 -0.088433  
H 4.372742 -1.836322 1.089401  
H 2.592421 -0.050827 1.430090  
H 4.209559 0.399894 1.948779  
H 4.532378 1.947298 0.089665  
C 2.626528 3.236631 -1.231644  
H 2.382738 3.063826 -2.294696  
H 1.904613 3.989993 -0.869211  
H 3.635155 3.671232 -1.172120  
H 0.606239 1.631013 -1.338060  
H 1.179102 0.259876 -0.409263  
H 0.762835 1.438084 1.719636  
H -2.428879 -0.078098 -2.249383  
O -4.180810 -0.850650 -1.435678  
H -3.947285 -1.791132 -1.516134

H -1.158646 -1.130538 2.562623  
H 1.120504 -1.441800 0.883888

6-c5,  $\Delta G = 0.2303$  kcal/mol, population = 15.47 %

O 0.533478 -0.951839 2.053241  
C -0.777067 -1.187257 1.752327  
C -1.403435 -0.435816 0.580826  
C -1.966136 -1.335976 -0.240428  
C -1.693584 -2.692952 0.264873  
O -2.049083 -3.754994 -0.204835  
O -0.979955 -2.595182 1.406080  
C -2.841151 -1.040030 -1.423854  
C -3.397770 0.368119 -1.239804  
H -3.921194 0.682709 -2.155866  
H -4.148011 0.333373 -0.431990  
C -2.274773 1.364489 -0.911229  
C -2.762947 2.809202 -1.031738  
H -3.073715 3.018348 -2.066860  
H -1.977206 3.533223 -0.767774  
H -3.630602 3.001303 -0.382079  
H -1.510899 1.212719 -1.689369  
C -1.565047 1.063444 0.454857  
C -2.423466 1.518820 1.659786  
H -2.581643 2.605729 1.633041  
H -1.916785 1.286641 2.608418  
H -3.405996 1.024060 1.669498  
C -0.196378 1.803352 0.550439  
H -0.405709 2.852749 0.806742  
C 0.686090 1.751325 -0.705445  
C 2.088376 2.294462 -0.511873  
C 3.177397 1.766527 -1.102087  
C 3.259819 0.563051 -2.003390  
C 3.985285 -0.612526 -1.333703  
C 3.207933 -1.189053 -0.173079  
O 1.984560 -1.133042 -0.164147  
C 3.979692 -1.809150 0.955856  
H 4.484472 -1.001245 1.513250  
H 3.314732 -2.360142 1.633434  
H 4.771739 -2.468456 0.568090  
H 4.133507 -1.442763 -2.050016  
H 4.993582 -0.326901 -0.993203  
H 3.818216 0.831463 -2.915979  
H 2.264453 0.232045 -2.328299

H 4.140521 2.257360 -0.909660  
C 2.212388 3.537069 0.334566  
H 1.539562 4.332100 -0.033284  
H 1.922983 3.347350 1.381566  
H 3.240252 3.927691 0.330992  
H 0.209413 2.353838 -1.499419  
H 0.735200 0.719068 -1.074607  
H 0.355591 1.384519 1.404275  
H -2.221744 -1.064976 -2.345121  
O -3.905797 -1.970214 -1.523845  
H -3.520701 -2.854509 -1.398775  
H -1.367998 -1.016796 2.667392  
H 1.078083 -1.059368 1.233230

6-c14,  $\Delta G = 0.4443$  kcal/mol, population =  
10.77 %

O 0.884562 -1.298764 -0.281523  
C -0.248960 -1.550575 0.435686  
C -1.278303 -0.443035 0.274719  
C -2.354534 -0.954932 -0.339668  
C -2.144091 -2.396370 -0.566868  
O -2.912158 -3.197949 -1.057692  
O -0.928061 -2.736614 -0.088430  
C -3.609044 -0.222251 -0.709198  
C -3.677138 1.058119 0.115897  
H -4.463112 1.715578 -0.286280  
H -3.982872 0.781691 1.138513  
C -2.331686 1.806354 0.134514  
C -2.503188 3.202159 0.737080  
H -2.899175 3.155291 1.763290  
H -3.217441 3.785477 0.135970  
H -1.558103 3.763999 0.763080  
H -2.034445 1.937114 -0.919473  
C -1.186515 0.969105 0.805589  
C -1.377755 0.877009 2.340743  
H -2.365090 0.473011 2.605250  
H -1.270833 1.868828 2.802914  
H -0.615218 0.222147 2.788240  
C 0.206176 1.606205 0.563907  
H 0.222141 2.575509 1.085089  
C 0.653589 1.804992 -0.893582  
C 1.964358 2.561952 -0.963386  
C 3.174322 1.973432 -0.995748

C 3.462863 0.497829 -0.985209  
C 3.824059 -0.008439 0.436755  
C 4.138264 -1.488646 0.443885  
O 3.247036 -2.329126 0.387953  
C 5.582579 -1.897293 0.493897  
H 6.014613 -1.578941 1.457533  
H 5.686109 -2.983498 0.378131  
H 6.148260 -1.370247 -0.291726  
H 4.678449 0.563145 0.828257  
H 2.963939 0.158965 1.101539  
H 4.309232 0.284107 -1.659849  
H 2.601582 -0.076322 -1.348840  
H 4.056721 2.625651 -0.995403  
C 1.834275 4.063606 -0.942554  
H 1.286031 4.420788 -1.832094  
H 1.251298 4.399179 -0.066960  
H 2.812768 4.565124 -0.914163  
H -0.107896 2.381496 -1.442418  
H 0.730223 0.822702 -1.376893  
H 0.957187 0.985607 1.073693  
H -3.546038 0.045448 -1.785324  
O -4.764068 -1.009505 -0.470780  
H -4.588113 -1.886312 -0.852120  
H -0.038472 -1.779729 1.495027  
H 1.669502 -1.793969 0.063461

6-c3,  $\Delta G = 0.6087$  kcal/mol, population = 8.16 %

O -0.375656 1.088637 2.077921  
C 0.939829 0.803207 1.805915  
C 1.194159 -0.155978 0.652479  
C 1.892718 0.492010 -0.290651  
C 2.212853 1.846270 0.190709  
O 2.898418 2.691941 -0.342328  
O 1.648005 2.015942 1.409888  
C 2.395220 -0.062297 -1.587598  
C 1.982484 -1.534396 -1.725477  
H 1.017545 -1.577067 -2.250394  
H 2.716460 -2.027544 -2.380615  
C 1.878002 -2.287593 -0.384890  
C 3.259046 -2.457557 0.260571  
H 3.229563 -3.139279 1.122029  
H 3.678375 -1.496040 0.590928  
H 3.961972 -2.881913 -0.472622

H 1.491154 -3.296199 -0.607638  
C 0.810033 -1.614355 0.555676  
C 0.813348 -2.267697 1.947349  
H 0.593014 -3.343473 1.863991  
H 0.056999 -1.816595 2.603435  
H 1.786657 -2.158500 2.444430  
C -0.593469 -1.767327 -0.118609  
H -0.675557 -1.037278 -0.936683  
C -1.821722 -1.609395 0.792372  
C -3.118877 -1.558122 0.017406  
C -3.963438 -0.510112 0.034270  
C -3.810213 0.801375 0.755247  
C -3.608340 1.972192 -0.223471  
C -2.295809 1.901153 -0.976707  
O -1.247768 1.628836 -0.405421  
C -2.318188 2.177500 -2.450986  
H -1.299884 2.208787 -2.858562  
H -2.896649 1.378281 -2.945410  
H -2.848443 3.121459 -2.655380  
H -4.445023 2.033990 -0.935617  
H -3.592664 2.929910 0.328565  
H -2.983080 0.777843 1.476805  
H -4.723771 1.009501 1.337367  
H -4.876492 -0.590499 -0.570166  
C -3.441448 -2.786232 -0.796943  
H -3.406755 -3.693994 -0.169190  
H -4.437725 -2.720438 -1.257859  
H -2.704847 -2.939530 -1.603812  
H -1.704113 -0.715843 1.412655  
H -1.870096 -2.468411 1.483913  
H -0.619118 -2.765958 -0.583001  
H 1.937125 0.515342 -2.414684  
O 3.814709 0.057162 -1.659584  
H 4.021890 0.992666 -1.505159  
H 1.413282 0.458065 2.738357  
H -0.816169 1.317756 1.222823

6-c41,  $\Delta G = 0.6796$  kcal/mol, population = 7.24 %

O 0.972896 0.475953 -2.317616  
C -0.337689 0.853944 -2.162740  
C -1.070815 0.301328 -0.945354  
C -1.460692 1.333966 -0.183893  
C -1.044903 2.593063 -0.827073



O -1.237157 3.729936 -0.449616  
O -0.418546 2.299254 -1.988316  
C -2.258577 1.259203 1.083666  
C -2.969116 -0.090034 1.111510  
H -3.409318 -0.255518 2.106921  
H -3.804374 -0.046329 0.392862  
C -2.008938 -1.241931 0.768568  
C -2.647162 -2.596740 1.080461  
H -2.873042 -2.668551 2.155436  
H -1.982521 -3.435028 0.824182  
H -3.593590 -2.736003 0.535592  
H -1.145431 -1.124182 1.442854  
C -1.434840 -1.143503 -0.688740  
C -2.495223 -1.531777 -1.747692  
H -3.398281 -0.909987 -1.666154  
H -2.785511 -2.585750 -1.634640  
H -2.091688 -1.410877 -2.764025  
C -0.219780 -2.092290 -0.880672  
H -0.595807 -3.126081 -0.861926  
C 0.916301 -1.931908 0.138625  
C 2.108932 -2.825044 -0.121983  
C 3.337750 -2.348956 -0.392230  
C 3.719892 -0.890523 -0.513496  
C 3.704294 -0.098923 0.811042  
C 2.886364 1.175427 0.823089  
O 2.076325 1.456089 -0.049848  
C 3.094581 2.096374 1.994874  
H 4.067836 2.601935 1.875202  
H 2.298029 2.850061 2.034561  
H 3.141503 1.530452 2.937550  
H 3.280212 -0.711451 1.628205  
H 4.720389 0.149245 1.158439  
H 3.047717 -0.398029 -1.229033  
H 4.724017 -0.819521 -0.955294  
H 4.145059 -3.076408 -0.534223  
C 1.849932 -4.306854 -0.024703  
H 2.775309 -4.890683 -0.135454  
H 1.390775 -4.562769 0.946539  
H 1.141856 -4.644814 -0.800540  
H 0.539426 -2.173163 1.147325  
H 1.215611 -0.878070 0.165346  
H 0.189390 -1.932930 -1.889591  
H -1.556122 1.315269 1.942209  
O -3.210619 2.306517 1.163196

H -2.745552 3.127508 0.929012  
H -0.871177 0.618708 -3.097179  
H 1.460537 0.745713 -1.503511

6-c8,  $\Delta G = 0.9375$  kcal/mol, population = 4.68 %

O -0.464400 1.554691 1.372884  
C 0.821934 1.110167 1.475843  
C 1.281640 0.000884 0.530968  
C 2.353680 0.452986 -0.140618  
C 2.648449 1.836143 0.273512  
O 3.551675 2.555617 -0.103036  
O 1.750600 2.208565 1.205507  
C 3.208068 -0.319566 -1.100101  
C 3.005774 -1.797271 -0.800126  
H 3.494594 -2.405745 -1.576439  
H 3.514216 -2.019851 0.153496  
C 1.516688 -2.160686 -0.714331  
C 1.361707 -3.683981 -0.660286  
H 1.942488 -4.116355 0.168796  
H 1.736403 -4.132156 -1.593191  
H 0.315180 -3.999404 -0.538778  
H 1.047905 -1.810484 -1.651785  
C 0.743627 -1.416038 0.441354  
C 0.983572 -2.098029 1.805456  
H 2.059921 -2.197152 2.010473  
H 0.534054 -3.100276 1.829746  
H 0.539430 -1.519533 2.627719  
C -0.765963 -1.438600 0.045620  
H -0.930772 -0.658558 -0.710942  
C -1.820713 -1.303085 1.157587  
C -3.227823 -1.350927 0.596720  
C -4.021239 -0.273359 0.449456  
C -3.710340 1.157445 0.790891  
C -3.699895 2.071127 -0.453526  
C -2.621050 1.701845 -1.451836  
O -1.442731 1.623316 -1.122956  
C -3.043690 1.414447 -2.861832  
H -3.695683 0.523828 -2.850574  
H -3.652640 2.244041 -3.255674  
H -2.173229 1.233976 -3.504969  
H -4.683210 2.059456 -0.946700  
H -3.503114 3.112677 -0.144022  
H -2.754028 1.249108 1.318297

H -4.485846 1.550038 1.471138  
H -5.016973 -0.436184 0.016196  
C -3.712116 -2.719793 0.187233  
H -3.046182 -3.175904 -0.564992  
H -3.716027 -3.406220 1.052252  
H -4.727767 -2.688276 -0.233457  
H -1.654625 -0.379162 1.720762  
H -1.706652 -2.139682 1.866472  
H -0.947059 -2.393606 -0.467532  
H 2.860320 -0.107931 -2.133425  
O 4.578118 0.015621 -0.965547  
H 4.627451 0.986278 -0.923455  
H 0.997935 0.826370 2.526141  
H -0.754834 1.627761 0.428995

6-c16,  $\Delta G = 1.3272$  kcal/mol, population = 2.42 %

O -0.923975 -0.131290 2.148914  
C 0.410327 0.202954 2.115520  
C 1.177281 -0.220299 0.868965  
C 1.643311 0.881712 0.267258  
C 1.251965 2.064059 1.054555  
O 1.501060 3.230936 0.834521  
O 0.572355 1.649481 2.147365  
C 2.450613 0.930705 -0.993472  
C 3.064894 -0.447751 -1.215485  
H 3.505929 -0.497810 -2.222979  
H 3.892278 -0.566515 -0.495799  
C 2.028318 -1.572259 -1.043452  
C 2.593646 -2.909200 -1.526746  
H 2.831007 -2.852725 -2.600251  
H 1.878625 -3.734071 -1.388540  
H 3.522482 -3.174213 -0.998330  
H 1.184459 -1.316703 -1.705379  
C 1.435603 -1.635763 0.407380  
C 2.429366 -2.273245 1.405777  
H 2.597657 -3.331552 1.160730  
H 2.031120 -2.233319 2.430716  
H 3.399582 -1.755557 1.400734  
C 0.121355 -2.458710 0.446600  
H 0.365118 -3.510936 0.236092  
C -0.974161 -1.958819 -0.514306  
C -2.406099 -2.004170 -0.001222  
C -3.367225 -1.221955 -0.526306

C -3.242233 -0.261008 -1.677748  
C -3.582896 1.195689 -1.339795  
C -2.516372 1.937229 -0.566591  
O -1.562586 1.362175 -0.063641  
C -2.661649 3.433226 -0.459777  
H -1.951291 3.833530 0.274869  
H -2.454622 3.881508 -1.446392  
H -3.693417 3.710386 -0.193957  
H -3.793768 1.776298 -2.254206  
H -4.513137 1.260613 -0.744164  
H -3.942245 -0.582604 -2.469064  
H -2.238725 -0.299051 -2.124729  
H -4.379410 -1.307863 -0.109545  
C -2.732936 -2.969907 1.108787  
H -2.368634 -3.985846 0.878378  
H -2.250950 -2.666975 2.052603  
H -3.817040 -3.023914 1.285153  
H -0.917327 -2.536911 -1.453862  
H -0.757410 -0.919910 -0.800009  
H -0.238738 -2.438641 1.481691  
H 1.762489 1.159102 -1.835198  
O 3.473789 1.910133 -0.921505  
H 3.058920 2.723043 -0.587391  
H 0.871044 -0.184259 3.037511  
H -1.332839 0.176851 1.314022

6-c24,  $\Delta G = 1.4069$  kcal/mol, population = 2.12 %

O -0.925377 -1.586090 -2.067829  
C -0.575054 -0.262881 -2.083260  
C -0.787660 0.548157 -0.812226  
C 0.369652 1.155156 -0.502222  
C 1.401911 0.753472 -1.473153  
O 2.563697 1.101767 -1.527284  
O 0.853640 -0.109492 -2.356404  
C 0.582407 2.155609 0.595666  
C -0.773687 2.769999 0.919582  
H -0.687595 3.402576 1.816295  
H -1.055684 3.431239 0.082708  
C -1.845977 1.692696 1.148909  
C -3.118467 2.324177 1.720197  
H -3.920445 1.586667 1.871504  
H -3.506327 3.119020 1.065051  
H -2.901063 2.780768 2.697791

H -1.442038 1.023875 1.925927  
C -2.105578 0.793655 -0.115868  
C -3.023889 1.510489 -1.135768  
H -3.152630 0.901820 -2.042772  
H -2.609395 2.484159 -1.435354  
H -4.022465 1.673527 -0.708018  
C -2.819915 -0.527997 0.293347  
H -3.785111 -0.232989 0.728862  
C -2.092287 -1.459695 1.293287  
C -1.354409 -2.638583 0.696240  
C -0.013126 -2.787963 0.737458  
C 0.995942 -1.845825 1.332735  
C 2.298578 -1.806276 0.533081  
C 3.258135 -0.710606 0.962731  
O 2.948835 0.118642 1.798667  
C 4.601609 -0.687801 0.275070  
H 5.098001 -1.667815 0.351184  
H 4.444025 -0.475144 -0.794127  
H 5.235542 0.094717 0.711744  
H 2.829141 -2.772565 0.590355  
H 2.101951 -1.667019 -0.544757  
H 1.229726 -2.157231 2.367219  
H 0.590859 -0.829989 1.415281  
H 0.400159 -3.716218 0.322181  
C -2.230934 -3.713206 0.101905  
H -1.639801 -4.522714 -0.349803  
H -2.878932 -4.149019 0.881872  
H -2.903188 -3.306476 -0.671186  
H -2.855123 -1.880832 1.969382  
H -1.421248 -0.878869 1.937987  
H -3.069422 -1.083102 -0.622400  
H 0.972231 1.622626 1.485102  
O 1.488629 3.172098 0.202638  
H 2.268585 2.726814 -0.168427  
H -1.090939 0.205129 -2.936432  
H -0.673174 -1.983014 -1.207585

6-c45,  $\Delta G = 1.5813$  kcal/mol, population = 1.58 %

O 0.268083 1.195627 -2.283266  
C -0.972036 1.281780 -1.711666  
C -1.312397 0.266118 -0.631288  
C -1.673375 0.925676 0.478107  
C -1.611672 2.376371 0.217239

O -1.930646 3.287046 0.949660  
O -1.158352 2.568558 -1.045154  
C -2.193550 0.328985 1.747638  
C -2.082232 -1.197669 1.692144  
H -1.098656 -1.472856 2.086042  
H -2.822098 -1.610866 2.394646  
C -2.296161 -1.828076 0.295462  
C -3.783517 -1.751695 -0.081388  
H -4.394703 -2.150929 0.742603  
H -4.019028 -2.337438 -0.980263  
H -4.103760 -0.712012 -0.246089  
H -2.031344 -2.896319 0.381179  
C -1.346295 -1.228742 -0.806384  
C -1.866709 -1.546222 -2.226704  
H -2.818089 -1.043522 -2.446939  
H -2.017495 -2.630242 -2.340641  
H -1.131790 -1.226224 -2.979880  
C 0.095777 -1.827668 -0.756874  
H 0.012062 -2.860345 -1.131105  
C 0.852529 -1.835705 0.577838  
C 2.304988 -2.241405 0.437012  
C 3.328768 -1.565585 0.990462  
C 3.287844 -0.301045 1.805555  
C 3.918013 0.888181 1.070686  
C 3.109148 1.363798 -0.112332  
O 1.924824 1.071517 -0.210283  
C 3.808363 2.191110 -1.154440  
H 3.082537 2.702429 -1.800300  
H 4.493436 2.916403 -0.690289  
H 4.426353 1.515237 -1.770695  
H 4.018095 1.761111 1.743436  
H 4.943935 0.663365 0.733136  
H 3.852408 -0.457056 2.740369  
H 2.261610 -0.039559 2.096321  
H 4.338183 -1.967211 0.830089  
C 2.562246 -3.509233 -0.339871  
H 3.619754 -3.807062 -0.292050  
H 1.949640 -4.341727 0.049500  
H 2.289656 -3.395847 -1.402688  
H 0.371641 -2.559426 1.258937  
H 0.784208 -0.846685 1.044226  
H 0.697679 -1.277740 -1.496584  
H -1.580874 0.697832 2.592840  
O -3.552702 0.716919 1.952066

H -3.569653 1.686261 1.963153  
H -1.718807 1.250183 -2.521655  
H 0.942732 1.172893 -1.558864

6-c9,  $\Delta G = 1.8631$  kcal/mol, population = 0.98 %

O 0.996310 0.056721 2.520799  
C 0.814899 -1.166604 1.917625  
C -0.125823 -1.213720 0.713735  
C 0.588123 -1.590959 -0.357907  
C 1.979961 -1.850544 0.053364  
O 2.908281 -2.229099 -0.628850  
O 2.082271 -1.642123 1.385361  
C 0.071656 -1.796689 -1.749740  
C -1.433722 -2.021134 -1.664619  
H -1.869332 -1.981704 -2.674906  
H -1.595680 -3.044649 -1.286546  
C -2.133724 -0.991325 -0.760835  
C -3.652337 -1.136234 -0.893921  
H -4.199888 -0.467075 -0.215147  
H -3.982161 -2.166398 -0.688784  
H -3.963515 -0.889327 -1.920533  
H -1.866871 0.003857 -1.143323  
C -1.628940 -1.033548 0.725299  
C -2.213712 -2.258293 1.474161  
H -3.300634 -2.148699 1.595671  
H -1.779737 -2.350163 2.480630  
H -2.016529 -3.194915 0.933625  
C -2.058529 0.230893 1.516635  
H -3.157856 0.282633 1.508927  
C -1.458120 1.588926 1.108631  
C -1.952848 2.260167 -0.155128  
C -1.139374 2.520986 -1.195828  
C 0.305287 2.098749 -1.274504  
C 1.270942 3.020825 -0.480812  
C 2.545424 2.271650 -0.161927  
O 2.557944 1.415400 0.713618  
C 3.768662 2.566087 -0.980726  
H 4.074488 3.612779 -0.816289  
H 4.589075 1.887145 -0.716296  
H 3.526263 2.476111 -2.052505  
H 1.472602 3.945133 -1.040563  
H 0.804320 3.293374 0.477005  
H 0.631223 2.056305 -2.324982

H 0.412894 1.079687 -0.876784  
H -1.545169 3.071942 -2.051473  
C -3.394694 2.692159 -0.157973  
H -3.660157 3.221831 -1.084376  
H -4.072761 1.828575 -0.056058  
H -3.607909 3.356040 0.698019  
H -0.369050 1.491321 1.090928  
H -1.675184 2.284356 1.939597  
H -1.779734 0.066038 2.568660  
H 0.268583 -0.872818 -2.333462  
O 0.685175 -2.908873 -2.378938  
H 1.641021 -2.832428 -2.218856  
H 0.505574 -1.881655 2.695870  
H 1.449039 0.652505 1.878725

6-c27,  $\Delta G = 2.0043$  kcal/mol, population = 0.77 %

O -0.191534 0.665791 2.429984  
C 1.002450 0.872001 1.793056  
C 1.348582 0.046804 0.558703  
C 1.690677 0.889410 -0.428344  
C 1.556937 2.276439 0.052736  
O 1.830094 3.304956 -0.527482  
O 1.104544 2.248198 1.328843  
C 2.313292 0.538836 -1.747455  
C 2.577729 -0.975208 -1.839456  
H 1.758966 -1.441998 -2.403216  
H 3.483464 -1.108636 -2.449423  
C 2.755883 -1.687893 -0.481577  
C 4.092816 -1.300204 0.161171  
H 4.127968 -0.229081 0.410793  
H 4.914780 -1.494255 -0.544994  
H 4.298867 -1.877400 1.073543  
H 2.782283 -2.771645 -0.686448  
C 1.513440 -1.452483 0.455506  
C 1.711908 -2.084150 1.841930  
H 2.570003 -1.652224 2.374956  
H 1.883865 -3.167104 1.742508  
H 0.824301 -1.931040 2.470565  
C 0.267066 -2.080842 -0.230989  
H 0.154173 -1.629819 -1.223914  
C -1.069337 -1.919199 0.510412  
C -2.265408 -2.125417 -0.397095  
C -2.652499 -1.192547 -1.285490

C -2.008854 0.147767 -1.525500  
C -2.961336 1.320699 -1.276403  
C -3.233964 1.603769 0.185447  
O -2.438917 1.305062 1.063333  
C -4.525700 2.301579 0.515110  
H -5.354062 1.586468 0.371978  
H -4.522554 2.652714 1.554808  
H -4.705462 3.137921 -0.178151  
H -2.530083 2.259616 -1.673768  
H -3.917724 1.189630 -1.808061  
H -1.669404 0.202946 -2.574616  
H -1.115379 0.285496 -0.903762  
H -3.520271 -1.412247 -1.920965  
C -2.975145 -3.447071 -0.276478  
H -2.274505 -4.284073 -0.445692  
H -3.378875 -3.585179 0.742130  
H -3.804239 -3.541038 -0.993527  
H -1.119870 -0.915091 0.944439  
H -1.121613 -2.619061 1.358059  
H 0.476578 -3.150232 -0.401276  
H 1.621121 0.829658 -2.561490  
O 3.542531 1.247429 -1.892915  
H 3.337787 2.188811 -1.769867  
H 1.797727 0.736211 2.545354  
H -0.943995 0.861190 1.828938

6-c40,  $\Delta G = 2.0382$  kcal/mol, population = 0.73 %

O -0.962007 -1.189332 0.090164  
C 0.144839 -1.496190 -0.651382  
C 1.283717 -0.519884 -0.383366  
C 2.267341 -1.190059 0.235517  
C 1.900777 -2.614590 0.333324  
O 2.557498 -3.528728 0.787332  
O 0.684167 -2.787078 -0.226417  
C 3.565813 -0.628688 0.731901  
C 3.815873 0.704521 0.037121  
H 4.627791 1.241347 0.551144  
H 4.172677 0.488564 -0.983357  
C 2.554752 1.585948 -0.004337  
C 2.911047 2.998166 -0.474168  
H 3.644983 3.447406 0.212337  
H 2.035629 3.663017 -0.501644  
H 3.363101 2.989799 -1.478112

H 2.193253 1.665736 1.034902  
C 1.385712 0.927271 -0.819149  
C 1.698045 0.904097 -2.337050  
H 2.662288 0.421440 -2.548473  
H 1.722428 1.926238 -2.741326  
H 0.919128 0.352429 -2.884396  
C 0.059494 1.709805 -0.645294  
H 0.215834 2.727561 -1.034911  
C -0.523616 1.794149 0.772512  
C -1.749532 2.687933 0.848645  
C -2.960925 2.334054 0.380583  
C -3.319189 1.035319 -0.289498  
C -3.966822 0.000348 0.661904  
C -4.307164 -1.271764 -0.088650  
O -3.428472 -1.980565 -0.567501  
C -5.757824 -1.616838 -0.264365  
H -6.223568 -1.755438 0.725562  
H -6.282248 -0.771761 -0.740662  
H -5.873962 -2.525928 -0.867723  
H -3.246171 -0.254837 1.455344  
H -4.863946 0.420401 1.139210  
H -2.434502 0.564348 -0.731086  
H -4.022128 1.238629 -1.115294  
H -3.781890 3.053074 0.492826  
C -1.519453 4.042875 1.464942  
H -1.178282 3.946832 2.510936  
H -0.716787 4.580440 0.928761  
H -2.423965 4.668705 1.449844  
H 0.237304 2.190230 1.461942  
H -0.764823 0.778093 1.111157  
H -0.688247 1.257720 -1.312881  
H 3.461824 -0.451989 1.823645  
O 4.648551 -1.509954 0.483776  
H 4.363279 -2.391733 0.777454  
H -0.078924 -1.610440 -1.726035  
H -1.792009 -1.598621 -0.261434

6-c7,  $\Delta G = 2.1210$  kcal/mol, population = 0.63 %

O -0.845527 -1.328286 2.120175  
C 0.001833 -0.259386 2.284182  
C 0.819743 0.125338 1.058048  
C 0.441454 1.352613 0.671583  
C -0.558054 1.870645 1.623635

O -1.104220 2.955383 1.619032  
O -0.756918 0.948216 2.587754  
C 0.996499 2.136498 -0.479845  
C 2.378854 1.579590 -0.807646  
H 2.726089 1.994929 -1.766089  
H 3.074671 1.937952 -0.031165  
C 2.383447 0.042348 -0.878824  
C 3.703967 -0.467252 -1.459881  
H 3.733787 -1.564940 -1.520784  
H 4.566598 -0.136712 -0.861188  
H 3.842026 -0.074911 -2.479078  
H 1.591089 -0.229437 -1.593769  
C 1.993507 -0.631944 0.482641  
C 3.131905 -0.474686 1.527085  
H 3.376978 0.581671 1.705286  
H 4.039904 -0.991897 1.187170  
H 2.841546 -0.921181 2.489571  
C 1.754943 -2.163643 0.331714  
H 2.751405 -2.614111 0.215164  
C 0.873042 -2.687106 -0.823917  
C -0.602305 -2.879469 -0.546376  
C -1.569337 -2.127231 -1.098581  
C -1.380750 -0.936790 -2.002925  
C -2.554865 0.043338 -1.995261  
C -2.867335 0.663452 -0.650038  
O -2.537442 0.137600 0.400656  
C -3.596685 1.981487 -0.658011  
H -2.856064 2.771195 -0.873100  
H -4.358459 2.020556 -1.450908  
H -4.041085 2.179652 0.325545  
H -2.399825 0.849255 -2.730178  
H -3.487193 -0.462103 -2.314004  
H -1.235342 -1.271826 -3.046076  
H -0.464626 -0.390664 -1.734557  
H -2.609442 -2.398170 -0.881804  
C -0.940671 -4.036043 0.358722  
H -2.026835 -4.141014 0.497617  
H -0.547450 -4.984696 -0.047186  
H -0.486842 -3.899538 1.353978  
H 1.268972 -3.682848 -1.089207  
H 1.019775 -2.074098 -1.722581  
H 1.374435 -2.547728 1.289785  
H 0.329975 1.988360 -1.356746  
O 1.096285 3.517195 -0.177371

H 0.266140 3.770594 0.261673  
H 0.631388 -0.462367 3.163350  
H -1.377872 -1.169309 1.313237

6-c35,  $\Delta G = 2.2327$  kcal/mol, population = 0.52 %

O 0.580410 1.255564 -2.005088  
C -0.742306 1.297842 -1.633074  
C -1.232929 0.200914 -0.701860  
C -1.712438 0.768125 0.413856  
C -1.625087 2.233855 0.279671  
O -2.028127 3.086671 1.038633  
O -1.035444 2.523523 -0.908741  
C -2.360549 0.074177 1.572940  
C -2.361878 -1.446472 1.351271  
H -1.464734 -1.871815 1.818900  
H -3.219443 -1.858075 1.904585  
C -2.438316 -1.881342 -0.126288  
C -3.831212 -1.576789 -0.695744  
H -4.013285 -0.494031 -0.764776  
H -4.602179 -1.991646 -0.028345  
H -3.981405 -2.021399 -1.689093  
H -2.301122 -2.975365 -0.150470  
C -1.265334 -1.277752 -0.983019  
C -1.502112 -1.523732 -2.486648  
H -2.410611 -1.028138 -2.854230  
H -1.598840 -2.603315 -2.680737  
H -0.650535 -1.148560 -3.072416  
C 0.108646 -1.946715 -0.631602  
H -0.075259 -3.020008 -0.459747  
C 0.923467 -1.356275 0.529665  
C 2.274229 -2.023550 0.691679  
C 3.352729 -1.672792 -0.032027  
C 3.417264 -0.603188 -1.091625  
C 4.111340 0.686556 -0.608554  
C 3.285505 1.446278 0.411376  
O 2.120336 1.749701 0.180949  
C 3.932284 1.806053 1.715085  
H 4.190673 0.871819 2.242817  
H 4.880804 2.337464 1.535503  
H 3.259200 2.413252 2.333193  
H 5.107749 0.461797 -0.200731  
H 4.254890 1.371879 -1.462940  
H 2.418505 -0.351444 -1.471977

H 3.987769 -0.984388 -1.954270  
H 4.294262 -2.202576 0.159645  
C 2.333657 -3.134474 1.706350  
H 3.322068 -3.615923 1.738978  
H 2.096150 -2.756465 2.716233  
H 1.579128 -3.909211 1.482426  
H 0.375050 -1.443037 1.477129  
H 1.057449 -0.283416 0.360109  
H 0.743576 -1.890702 -1.528061  
H -1.780232 0.299361 2.489026  
O -3.698640 0.541093 1.736735  
H -3.648547 1.505496 1.829998  
H -1.345023 1.322989 -2.555429  
H 1.155758 1.393581 -1.212483

6-c18,  $\Delta G = 2.4090$  kcal/mol, population = 0.39 %

O -0.678783 0.580480 2.503465  
C 0.656195 0.477535 2.172186  
C 0.971332 -0.188496 0.838198  
C 1.537575 0.726636 0.037094  
C 1.719312 1.980071 0.792816  
O 2.253123 3.005944 0.429474  
O 1.234039 1.804526 2.043914  
C 2.089268 0.510472 -1.339495  
C 1.950515 -0.967367 -1.738032  
H 1.011047 -1.092977 -2.294107  
H 2.762093 -1.196111 -2.444848  
C 1.991844 -1.950694 -0.550969  
C 3.388163 -1.984078 0.082563  
H 4.144477 -2.161201 -0.697426  
H 3.486147 -2.788455 0.824902  
H 3.641146 -1.029390 0.566445  
H 1.786697 -2.956110 -0.955009  
C 0.832074 -1.650346 0.472061  
C 0.952799 -2.532332 1.725475  
H 1.895851 -2.356852 2.260310  
H 0.913344 -3.596446 1.444654  
H 0.132573 -2.337443 2.429920  
C -0.521778 -1.934038 -0.247515  
H -0.675134 -1.169113 -1.020116  
C -1.787683 -1.996628 0.624652  
C -3.041359 -2.067683 -0.223238  
C -3.736013 -0.974504 -0.590541

C -3.388537 0.440889 -0.217231  
C -2.536812 1.167127 -1.270580  
C -1.597991 2.217476 -0.720520  
O -1.327112 2.292711 0.469445  
C -0.961453 3.155329 -1.711616  
H -0.053402 3.600396 -1.284482  
H -0.735525 2.643627 -2.658854  
H -1.681790 3.959031 -1.942436  
H -1.871836 0.451307 -1.789014  
H -3.144210 1.612480 -2.075265  
H -2.832450 0.448376 0.728138  
H -4.306119 1.024735 -0.038849  
H -4.607824 -1.111761 -1.241589  
C -3.439798 -3.445469 -0.683109  
H -4.322045 -3.423366 -1.339705  
H -2.615747 -3.933851 -1.232221  
H -3.663858 -4.097292 0.179699  
H -1.810815 -1.126073 1.291817  
H -1.744582 -2.886098 1.272783  
H -0.411421 -2.890632 -0.784687  
H 1.511493 1.127430 -2.055593  
O 3.460154 0.897640 -1.382952  
H 3.501290 1.813146 -1.062261  
H 1.171789 -0.020354 3.007222  
H -1.108650 1.134933 1.813511

6-c13,  $\Delta G = 2.5376$  kcal/mol, population = 0.31 %

O 0.582091 0.487702 -2.573389  
C -0.602990 0.941894 -2.081504  
C -1.180211 0.354453 -0.796186  
C -1.555198 1.371719 -0.004014  
C -1.147879 2.644858 -0.620411  
O -1.308948 3.771468 -0.197490  
O -0.541324 2.381066 -1.798915  
C -2.387643 1.266709 1.241465  
C -3.155313 -0.049453 1.158414  
H -3.682069 -0.231761 2.107810  
H -3.923062 0.054538 0.372876  
C -2.203942 -1.217296 0.856641  
C -2.888995 -2.567086 1.077307  
H -3.188844 -2.670466 2.131443  
H -2.223155 -3.410328 0.837613  
H -3.797689 -2.669000 0.464425

H -1.402615 -1.138434 1.606272  
C -1.503501 -1.100408 -0.543262  
C -2.426832 -1.565046 -1.693539  
H -3.356459 -0.977394 -1.729400  
H -2.690273 -2.624711 -1.575062  
H -1.919433 -1.461956 -2.664223  
C -0.210107 -1.969396 -0.594166  
H -0.514243 -3.016189 -0.744790  
C 0.701668 -1.875428 0.637529  
C 2.075226 -2.488104 0.457359  
C 3.189477 -1.959110 0.993913  
C 3.308419 -0.722265 1.838526  
C 3.908920 0.501980 1.091346  
C 2.913115 1.053330 0.101288  
O 2.667037 0.431961 -0.925701  
C 2.198924 2.330245 0.448125  
H 1.572263 2.667161 -0.385455  
H 1.574291 2.168310 1.343485  
H 2.929079 3.111046 0.711913  
H 4.197300 1.274128 1.818435  
H 4.809182 0.186422 0.540835  
H 3.979493 -0.935033 2.686666  
H 2.342065 -0.436984 2.281169  
H 4.138137 -2.476886 0.804039  
C 2.137408 -3.777319 -0.320870  
H 3.151181 -4.202908 -0.315601  
H 1.445714 -4.527379 0.102164  
H 1.832756 -3.633144 -1.370981  
H 0.212916 -2.393834 1.481915  
H 0.794100 -0.823540 0.942137  
H 0.352193 -1.681973 -1.493909  
H -1.718430 1.239115 2.126944  
O -3.296513 2.348130 1.345585  
H -2.796669 3.159773 1.153122  
H -1.352010 0.833795 -2.884194  
H 1.306900 0.529037 -1.898445

6-c23,  $\Delta G = 2.7359$  kcal/mol, population = 0.22 %

O 0.694699 0.790869 -1.941025  
C -0.674603 0.757435 -1.851765  
C -1.255570 -0.019726 -0.676520  
C -1.948334 0.832743 0.092775  
C -1.913346 2.172611 -0.520034

O -2.452243 3.189621 -0.137260  
O -1.191675 2.107209 -1.662721  
C -2.714436 0.494772 1.337184  
C -2.986230 -1.006379 1.332878  
H -3.361026 -1.316553 2.320331  
H -3.794046 -1.198994 0.607764  
C -1.727059 -1.815739 0.976924  
C -1.941345 -3.305375 1.250228  
H -2.152450 -3.466691 2.318487  
H -1.055648 -3.905459 0.993494  
H -2.796005 -3.703687 0.682057  
H -0.937000 -1.465933 1.661427  
C -1.206506 -1.516669 -0.472541  
C -2.132155 -2.135603 -1.549884  
H -3.167431 -1.779116 -1.452783  
H -2.131500 -3.232110 -1.473765  
H -1.779322 -1.877534 -2.559532  
C 0.214832 -2.095293 -0.704640  
H 0.119134 -3.187692 -0.789666  
C 1.259550 -1.752659 0.362875  
C 2.670577 -2.193672 0.022299  
C 3.752321 -1.439546 0.291227  
C 3.731120 -0.075020 0.926012  
C 3.643479 1.080043 -0.123025  
C 2.781627 2.189306 0.426856  
O 1.590638 2.254447 0.140645  
C 3.405567 3.162847 1.384912  
H 2.644280 3.824047 1.817450  
H 3.940995 2.622514 2.182074  
H 4.160508 3.760988 0.847943  
H 4.649891 1.449437 -0.369503  
H 3.177194 0.703747 -1.043279  
H 4.632669 0.066381 1.540913  
H 2.878196 -0.002357 1.617712  
H 4.738209 -1.832024 0.015956  
C 2.817757 -3.562507 -0.590420  
H 2.348505 -3.614292 -1.587071  
H 3.875074 -3.844759 -0.697097  
H 2.315977 -4.326761 0.029097  
H 0.977965 -2.243656 1.311909  
H 1.232946 -0.671644 0.556525  
H 0.574212 -1.742547 -1.682880  
H -2.080089 0.744177 2.214109  
O -3.940448 1.203279 1.404215



H -3.740761 2.131512 1.195657  
H -1.073085 0.396368 -2.813268  
H 1.040765 1.256380 -1.136719

6-c43,  $\Delta G = 2.7661$  kcal/mol, population = 0.21 %

O 0.466593 1.563424 0.435106  
C -0.522779 1.399867 -0.501860  
C -1.411982 0.202415 -0.188587  
C -2.620499 0.669717 0.159366  
C -2.643620 2.134410 -0.007573  
O -3.576178 2.893323 0.157354  
O -1.431973 2.539375 -0.443552  
C -3.801516 -0.131819 0.611831  
C -3.595218 -1.573994 0.172097  
H -4.327001 -2.223426 0.676394  
H -3.816083 -1.624327 -0.907112  
C -2.170777 -2.089255 0.444647  
C -2.125013 -3.593832 0.157303  
H -1.121244 -4.023992 0.282987  
H -2.461474 -3.815566 -0.867252  
H -2.799470 -4.125830 0.845486  
H -1.966090 -1.944173 1.521057  
C -1.059259 -1.267129 -0.310448  
C -1.059703 -1.609027 -1.818995  
H -0.690069 -2.630731 -1.988264  
H -0.416559 -0.924526 -2.389394  
H -2.073215 -1.532911 -2.237279  
C 0.316398 -1.603998 0.338506  
H 0.380392 -1.093465 1.311545  
C 1.580027 -1.296259 -0.481077  
C 2.843150 -1.820612 0.176615  
C 3.543108 -1.136617 1.099756  
C 3.216207 0.224795 1.652143  
C 4.119890 1.350788 1.099245  
C 3.893254 1.601628 -0.378545  
O 2.804918 1.978524 -0.799962  
C 5.036370 1.350195 -1.315933  
H 5.915769 1.939000 -1.008340  
H 5.324270 0.288128 -1.232910  
H 4.756501 1.586754 -2.350127  
H 3.886137 2.293362 1.623061  
H 5.178685 1.118356 1.285824  
H 3.350186 0.209978 2.746449

H 2.166319 0.484540 1.470465  
H 4.451491 -1.603622 1.500945  
C 3.265894 -3.199177 -0.260451  
H 4.144367 -3.560465 0.293964  
H 2.444921 -3.923682 -0.116424  
H 3.503294 -3.213362 -1.338738  
H 1.663879 -0.219834 -0.657299  
H 1.497658 -1.769244 -1.470465  
H 0.321205 -2.681114 0.560336  
H -3.835264 -0.090408 1.721323  
O -5.015065 0.363437 0.070128  
H -5.004276 1.327400 0.196734  
H -0.124845 1.382947 -1.529895  
H 1.300138 1.879601 0.010518

6-c37,  $\Delta G = 2.8997$  kcal/mol, population = 0.17 %

O 0.083855 -1.974122 -1.714895  
C 1.308723 -1.412048 -1.463598  
C 1.345598 -0.146050 -0.624909  
C 2.160553 -0.341554 0.420805  
C 2.724182 -1.702266 0.338530  
O 3.553033 -2.221055 1.052295  
O 2.179309 -2.328841 -0.735972  
C 2.541298 0.674756 1.453960  
C 1.711847 1.951742 1.261463  
H 0.781462 1.840668 1.836904  
H 2.262876 2.783998 1.725134  
C 1.377516 2.298326 -0.205973  
C 2.637964 2.727221 -0.967877  
H 2.402139 3.121564 -1.966195  
H 3.343819 1.891052 -1.078177  
H 3.160756 3.520908 -0.412304  
H 0.692329 3.162539 -0.182255  
C 0.600572 1.131429 -0.903954  
C 0.468142 1.343800 -2.422627  
H 0.046331 2.334810 -2.643236  
H -0.194830 0.582820 -2.860215  
H 1.440078 1.273061 -2.930340  
C -0.810207 0.935944 -0.275639  
H -1.139849 -0.071684 -0.536883  
C -1.914870 1.910713 -0.701084  
C -3.172218 1.706214 0.128117  
C -3.945306 0.608270 0.041155

C -3.740597 -0.583825 -0.853050  
C -3.620062 -1.926940 -0.083276  
C -2.484821 -1.954908 0.922219  
O -1.329070 -2.177574 0.583311  
C -2.817697 -1.672215 2.358991  
H -3.551036 -2.407302 2.728290  
H -1.911395 -1.693564 2.977071  
H -3.299106 -0.682573 2.423560  
H -4.568999 -2.128439 0.436621  
H -3.446297 -2.736424 -0.808893  
H -2.864710 -0.457256 -1.503254  
H -4.609141 -0.693701 -1.525539  
H -4.824206 0.550940 0.696114  
C -3.482953 2.804123 1.109879  
H -3.647571 3.763825 0.589233  
H -4.371590 2.580892 1.718438  
H -2.627834 2.965352 1.790363  
H -2.140668 1.771059 -1.769535  
H -1.573617 2.951547 -0.589541  
H -0.721461 0.938846 0.819799  
H 2.326385 0.259774 2.457482  
O 3.932885 0.979068 1.361562  
H 4.412655 0.143587 1.468649  
H 1.793997 -1.241061 -2.438695  
H -0.433700 -2.083540 -0.881515

6-c47,  $\Delta G = 3.0302$  kcal/mol, population = 0.14 %

O -0.885467 0.985666 -0.296919  
C 0.167318 1.174741 0.557216  
C 1.331366 0.255815 0.218048  
C 2.352967 1.022232 -0.193682  
C 1.976578 2.442893 -0.086293  
O 2.655170 3.419395 -0.328801  
O 0.714716 2.519401 0.386952  
C 3.690405 0.556933 -0.680620  
C 3.894477 -0.877582 -0.215190  
H 4.759368 -1.317626 -0.734767  
H 4.148829 -0.845723 0.857437  
C 2.651025 -1.754679 -0.440511  
C 3.006333 -3.216901 -0.151799  
H 3.432594 -3.333580 0.856500  
H 3.762928 -3.567839 -0.870140  
H 2.139547 -3.888869 -0.230202

H 2.382658 -1.676944 -1.509966  
C 1.384284 -1.251710 0.347195  
C 1.509314 -1.585392 1.851554  
H 2.465890 -1.222877 2.253929  
H 1.452966 -2.669934 2.019136  
H 0.706486 -1.116050 2.436512  
C 0.123228 -1.917399 -0.284782  
H -0.163115 -1.343061 -1.178534  
C -1.103949 -2.079368 0.626668  
C -2.316089 -2.619933 -0.099813  
C -3.492412 -1.971204 -0.189057  
C -3.825409 -0.612844 0.355379  
C -4.028427 0.434308 -0.768197  
C -4.124639 1.822903 -0.175158  
O -3.124108 2.378928 0.265301  
C -5.474463 2.473711 -0.100210  
H -6.188945 1.792944 0.391162  
H -5.420738 3.427754 0.439171  
H -5.852665 2.639191 -1.122955  
H -3.152914 0.409595 -1.434368  
H -4.923201 0.194070 -1.360926  
H -3.031542 -0.250912 1.020999  
H -4.748910 -0.665685 0.958113  
H -4.304789 -2.465273 -0.737188  
C -2.145464 -3.981313 -0.727329  
H -1.408286 -3.957310 -1.547788  
H -1.765473 -4.709980 0.010163  
H -3.092133 -4.362975 -1.136504  
H -1.342297 -1.124883 1.107910  
H -0.854339 -2.787071 1.436083  
H 0.417697 -2.914485 -0.639997  
H 3.674775 0.579984 -1.791023  
O 4.741308 1.374478 -0.192378  
H 4.473838 2.295528 -0.351102  
H -0.127707 1.118703 1.620596  
H -1.657324 1.539635 -0.013882

6-c42,  $\Delta G = 3.2417$  kcal/mol, population = 0.10 %

O 0.599864 -0.998996 2.035505  
C -0.715075 -0.631575 1.943002  
C -1.163465 0.063062 0.658600  
C -2.122396 -0.690388 0.096258  
C -2.375128 -1.873133 0.938979

O -3.187313 -2.758667 0.765964  
O -1.562466 -1.819631 2.013162  
C -2.904018 -0.375724 -1.143273  
C -2.829070 1.127971 -1.361939  
H -3.252383 1.382512 -2.345696  
H -3.467597 1.609082 -0.601682  
C -1.388921 1.652589 -1.264087  
C -1.347388 3.113795 -1.722409  
H -0.349776 3.564597 -1.618205  
H -2.057705 3.732254 -1.152568  
H -1.631416 3.181219 -2.783700  
H -0.782575 1.061077 -1.973974  
C -0.723234 1.421916 0.147370  
C -1.198544 2.480458 1.165880  
H -2.296925 2.517095 1.208498  
H -0.830020 3.479680 0.895147  
H -0.833469 2.257583 2.178132  
C 0.819563 1.491906 -0.073657  
H 1.137249 0.536646 -0.514960  
C 1.732000 1.838447 1.114676  
C 3.169353 2.028530 0.658238  
C 3.988712 1.001812 0.367651  
C 3.614761 -0.452875 0.437620  
C 3.367567 -1.076599 -0.948794  
C 2.354793 -2.201979 -0.989132  
O 1.443276 -2.295011 -0.177607  
C 2.480191 -3.187973 -2.117527  
H 3.370704 -3.814944 -1.940615  
H 1.588483 -3.824764 -2.175476  
H 2.646173 -2.664619 -3.072149  
H 2.944577 -0.317403 -1.634887  
H 4.302245 -1.403491 -1.429834  
H 2.713014 -0.570252 1.047094  
H 4.408709 -1.029375 0.941735  
H 4.998756 1.230728 0.005626  
C 3.609199 3.458416 0.487135  
H 2.931900 3.994689 -0.201559  
H 3.565012 4.002631 1.447102  
H 4.632885 3.534726 0.091570  
H 1.662913 1.056860 1.882283  
H 1.388589 2.774125 1.579247  
H 1.002965 2.248181 -0.851266  
H -2.424024 -0.892176 -2.001524  
O -4.257834 -0.776581 -1.025013

H -4.254423 -1.674873 -0.651896  
H -0.960407 -0.028971 2.831799  
H 0.890081 -1.454700 1.207981

6-c36,  $\Delta G = 3.3409$  kcal/mol, population = 0.08 %

O -0.864368 -0.481083 -2.200331  
C 0.401588 -0.953557 -1.943529  
C 1.149431 -0.359296 -0.753622  
C 1.413368 -1.349435 0.113444  
C 0.934445 -2.624771 -0.452182  
O 1.065713 -3.743216 -0.005126  
O 0.348589 -2.374355 -1.647077  
C 2.248851 -1.270239 1.356012  
C 2.818110 0.147288 1.522843  
H 2.142854 0.722193 2.171744  
H 3.768783 0.057768 2.069461  
C 3.044046 0.903065 0.197279  
C 4.186610 0.268077 -0.604771  
H 4.471393 0.879810 -1.472178  
H 3.926355 -0.740277 -0.958888  
H 5.076824 0.165783 0.034447  
H 3.350805 1.929875 0.458205  
C 1.699910 1.043639 -0.612311  
C 1.941827 1.668706 -1.996020  
H 2.618567 1.059179 -2.609605  
H 2.390367 2.668317 -1.885683  
H 1.000746 1.776610 -2.552180  
C 0.740426 1.951991 0.211550  
H 0.500088 1.447062 1.156980  
C -0.579931 2.357358 -0.462158  
C -1.506419 3.070594 0.502786  
C -2.312768 2.395700 1.341453  
C -2.411756 0.895299 1.399444  
C -3.497915 0.327275 0.448322  
C -3.348161 -1.172673 0.350501  
O -2.483697 -1.663127 -0.365877  
C -4.239632 -2.034051 1.197303  
H -3.940110 -3.087609 1.132335  
H -4.212023 -1.689849 2.243946  
H -5.282191 -1.917911 0.856626  
H -4.499691 0.610135 0.802744  
H -3.352376 0.751737 -0.556503  
H -2.632389 0.570566 2.429088

H -1.450746 0.434661 1.128683  
H -2.964701 2.960682 2.017678  
C -1.441233 4.573548 0.496257  
H -1.736791 4.974644 -0.489189  
H -2.091695 5.020326 1.262589  
H -0.408265 4.921598 0.673512  
H -1.059927 1.463950 -0.882260  
H -0.373980 3.020308 -1.316086  
H 1.300449 2.862206 0.484254  
H 1.612301 -1.504860 2.231547  
O 3.316564 -2.212264 1.281448  
H 2.912121 -3.078019 1.108570  
H 0.996963 -0.841100 -2.864097  
H -1.469614 -0.808727 -1.488513

6-c17,  $\Delta G = 3.3409$  kcal/mol, population = 0.08 %

O -0.213703 1.827943 -1.875845  
C -1.410276 1.181671 -1.679362  
C -1.374107 0.035999 -0.683178  
C -2.166763 0.345757 0.353200  
C -2.864402 1.611822 0.060876  
O -3.729109 2.162598 0.704235  
O -2.406373 2.090289 -1.124051  
C -2.374222 -0.467561 1.593536  
C -1.424027 -1.670626 1.580243  
H -0.463063 -1.349403 2.010593  
H -1.831400 -2.433867 2.260436  
C -1.186690 -2.275097 0.182646  
C -2.467568 -2.908607 -0.377511  
H -3.226096 -2.151767 -0.623960  
H -2.912084 -3.579670 0.373290  
H -2.266363 -3.506307 -1.277800  
H -0.452632 -3.086965 0.301999  
C -0.542824 -1.218851 -0.777906  
C -0.486491 -1.724889 -2.230137  
H -1.488475 -1.879528 -2.653274  
H 0.052761 -2.682649 -2.283175  
H 0.043482 -1.002805 -2.868962  
C 0.893475 -0.820466 -0.322423  
H 1.329817 -0.214572 -1.128675  
C 1.864175 -1.956548 0.035129  
C 3.317594 -1.510248 -0.017816  
C 3.854435 -0.583561 0.796690

C 3.176315 0.190414 1.892401  
C 3.145371 1.726346 1.647438  
C 2.354988 2.100926 0.411881  
O 1.137946 2.236168 0.474588  
C 3.104464 2.252784 -0.881176  
H 2.421161 2.418843 -1.723282  
H 3.807727 3.097637 -0.795439  
H 3.711715 1.350844 -1.056533  
H 2.669597 2.212467 2.512054  
H 4.177673 2.098509 1.558272  
H 3.726934 0.042933 2.837331  
H 2.153937 -0.170141 2.072294  
H 4.911949 -0.331370 0.645733  
C 4.140179 -2.154006 -1.102649  
H 5.172162 -1.774258 -1.124908  
H 4.173425 -3.250250 -0.974757  
H 3.681462 -1.972469 -2.091074  
H 1.732809 -2.799537 -0.659948  
H 1.625275 -2.348174 1.037521  
H 0.806999 -0.149748 0.537629  
H -2.131164 0.167579 2.467614  
O -3.726145 -0.908790 1.696130  
H -4.283602 -0.116201 1.666145  
H -1.790128 0.870275 -2.664825  
H 0.207268 2.036296 -1.005415

6-c28,  $\Delta G = 3.3427$  kcal/mol, population = 0.08 %

O 0.695336 -0.650942 2.225412  
C -0.617397 -0.853725 1.868654  
C -1.143423 -0.099009 0.651337  
C -1.536622 -0.999338 -0.263344  
C -1.364349 -2.355302 0.291170  
O -1.683880 -3.415827 -0.200019  
O -0.827938 -2.250413 1.530063  
C -2.247706 -0.730289 -1.555727  
C -2.509095 0.775721 -1.713724  
H -1.687954 1.214859 -2.297203  
H -3.416820 0.889630 -2.324997  
C -2.674156 1.536775 -0.382224  
C -3.975180 1.130342 0.320695  
H -3.947800 0.083783 0.658177  
H -4.819617 1.221617 -0.379417  
H -4.193569 1.770616 1.186762

H -2.750036 2.609009 -0.629402  
C -1.390773 1.388478 0.519312  
C -1.601512 2.024029 1.903336  
H -0.700354 1.929454 2.524265  
H -2.428872 1.552575 2.450328  
H -1.831803 3.095474 1.795808  
C -0.212419 2.099550 -0.208939  
H -0.010578 1.573945 -1.152104  
C 1.110536 2.217892 0.563989  
C 2.227544 2.747313 -0.313626  
C 2.940969 1.939173 -1.117981  
C 2.742349 0.450854 -1.217314  
C 3.621908 -0.341212 -0.214355  
C 3.168920 -1.781730 -0.174410  
O 2.174333 -2.100381 0.466133  
C 3.929500 -2.790184 -0.985745  
H 3.421647 -3.762750 -0.974702  
H 4.047596 -2.429225 -2.020380  
H 4.946616 -2.892511 -0.571595  
H 4.682820 -0.259773 -0.491873  
H 3.492368 0.085925 0.791539  
H 2.967313 0.106836 -2.239736  
H 1.691767 0.188407 -1.026432  
H 3.739260 2.373478 -1.730856  
C 2.463275 4.232249 -0.263183  
H 3.243048 4.552732 -0.969747  
H 1.535968 4.784302 -0.497557  
H 2.761511 4.547719 0.752139  
H 1.370906 1.238476 0.985909  
H 0.980549 2.892929 1.423367  
H -0.558095 3.108867 -0.488748  
H -1.609393 -1.071864 -2.393991  
O -3.484485 -1.439218 -1.583572  
H -3.274464 -2.371748 -1.412410  
H -1.243492 -0.640784 2.750264  
H 1.272935 -1.080037 1.545261

6-c26,  $\Delta G = 3.4199$  kcal/mol, population = 0.07 %

O 0.342201 -1.082487 2.304960  
C -0.928137 -0.943292 1.807821  
C -1.169007 0.016751 0.646455  
C -1.763265 -0.662667 -0.346351  
C -1.935260 -2.067454 0.066972

O -2.485749 -2.966422 -0.531424  
O -1.416386 -2.219371 1.307996  
C -2.379475 -0.098060 -1.592326  
C -2.288357 1.438251 -1.592535  
H -1.415671 1.738311 -2.188342  
H -3.170147 1.815426 -2.131518  
C -2.219112 2.083798 -0.191780  
C -3.568264 1.962842 0.527134  
H -3.586406 2.523014 1.472392  
H -3.823752 0.913698 0.738108  
H -4.367616 2.367741 -0.112397  
H -2.013630 3.157449 -0.341043  
C -1.006715 1.519815 0.640245  
C -0.995824 2.073080 2.074529  
H -0.133345 1.689356 2.636177  
H -1.899991 1.794010 2.632181  
H -0.934524 3.172161 2.055000  
C 0.303462 1.938794 -0.086602  
H 0.257131 1.589698 -1.125858  
C 1.616269 1.424857 0.516037  
C 2.817706 1.777221 -0.339091  
C 3.181421 1.065881 -1.422400  
C 2.501917 -0.162238 -1.971230  
C 3.166577 -1.500304 -1.550073  
C 2.869495 -1.769386 -0.093346  
O 1.733189 -2.092654 0.236414  
C 3.959424 -1.538469 0.909189  
H 4.313212 -0.498894 0.801714  
H 3.608949 -1.719061 1.933409  
H 4.820414 -2.187592 0.680535  
H 2.724080 -2.318786 -2.138669  
H 4.249178 -1.470573 -1.740521  
H 2.519585 -0.118232 -3.071726  
H 1.442830 -0.208071 -1.676864  
H 4.070956 1.394945 -1.973380  
C 3.574688 3.008720 0.081551  
H 4.394568 3.248994 -0.610928  
H 2.900227 3.881447 0.136471  
H 3.997603 2.881735 1.093509  
H 1.540537 0.341495 0.649157  
H 1.760431 1.841581 1.523986  
H 0.322306 3.040549 -0.132361  
H -1.834447 -0.487563 -2.474132  
O -3.747301 -0.495391 -1.667088

H -3.759617 -1.464131 -1.598325  
H -1.582654 -0.662705 2.650032  
H 0.911878 -1.493020 1.610599

6-c32,  $\Delta G = 3.9339$  kcal/mol, population = 0.03 %

O 1.007892 -0.692148 -2.191041  
C -0.116734 0.090289 -2.227251  
C -0.941682 0.137304 -0.947140  
C -0.944116 1.400556 -0.494155  
C -0.188566 2.250961 -1.431457  
O 0.004201 3.447234 -1.370484  
O 0.250153 1.484135 -2.453616  
C -1.637287 1.916495 0.731503  
C -2.717331 0.916849 1.134784  
H -3.067772 1.144829 2.152913  
H -3.577351 1.063823 0.461492  
C -2.220717 -0.539068 1.073226  
C -3.237518 -1.481386 1.720563  
H -3.399393 -1.194757 2.770895  
H -2.899529 -2.527785 1.711775  
H -4.213620 -1.435479 1.213720  
H -1.305921 -0.577619 1.687854  
C -1.792595 -0.971315 -0.371831  
C -3.021938 -1.064890 -1.317345  
H -3.552901 -0.106263 -1.392633  
H -3.724885 -1.829578 -0.958219  
H -2.708155 -1.356384 -2.330708  
C -1.134617 -2.382631 -0.394222  
H -1.961397 -3.094728 -0.263201  
C -0.044233 -2.746382 0.642969  
C 1.396567 -2.689170 0.185885  
C 2.353276 -1.988074 0.820886  
C 2.184515 -1.093865 2.021013  
C 1.763649 0.357814 1.671670  
C 2.712389 0.994781 0.684819  
O 2.635488 0.748083 -0.511749  
C 3.772008 1.914954 1.222958  
H 4.311639 1.428784 2.052024  
H 4.471642 2.208520 0.430300  
H 3.288409 2.811707 1.645541  
H 0.772100 0.332960 1.202808  
H 1.703692 0.956193 2.592698  
H 3.129215 -1.064074 2.587307

H 1.425155 -1.490356 2.712252  
H 3.369370 -2.046452 0.414859  
C 1.740955 -3.552355 -1.000276  
H 1.246383 -3.182739 -1.911504  
H 2.824485 -3.563886 -1.188357  
H 1.403166 -4.591450 -0.841132  
H -0.231289 -3.794828 0.936583  
H -0.179207 -2.162077 1.561350  
H -0.760017 -2.565773 -1.411038  
H -0.887620 1.987763 1.548038  
O -2.224203 3.186836 0.505152  
H -1.547212 3.735744 0.074504  
H -0.721588 -0.221408 -3.093011  
H 1.584684 -0.364881 -1.460532

6-c20,  $\Delta G = 3.9709$  kcal/mol, population = 0.03 %

O 0.015666 1.827196 -1.591622  
C -1.192297 1.184131 -1.603585  
C -1.383235 0.014579 -0.637983  
C -2.421295 0.301937 0.161344  
C -2.981660 1.612223 -0.212868  
O -3.944013 2.180089 0.261471  
O -2.260132 2.113953 -1.236434  
C -2.993769 -0.583090 1.224126  
C -2.572933 -2.007773 0.897177  
H -2.853374 -2.677209 1.724825  
H -3.149096 -2.329371 0.012545  
C -1.064226 -2.135593 0.621172  
C -0.726122 -3.627951 0.510796  
H 0.326764 -3.818451 0.275454  
H -1.337639 -4.116521 -0.263317  
H -0.949171 -4.128366 1.465794  
H -0.538891 -1.732565 1.505917  
C -0.573087 -1.268199 -0.599261  
C -0.762437 -1.999618 -1.944543  
H -0.111618 -2.882194 -2.009623  
H -0.504772 -1.339653 -2.786319  
H -1.802895 -2.331016 -2.079333  
C 0.911214 -0.837744 -0.422817  
H 1.212511 -0.292592 -1.328714  
C 1.974763 -1.904874 -0.121711  
C 3.376328 -1.341392 -0.288176  
C 3.955395 -0.500886 0.587927

C 3.361898 0.056660 1.851663  
C 3.309094 1.608859 1.863560  
C 2.448596 2.142681 0.738178  
O 1.226358 2.116737 0.835782  
C 3.136760 2.631690 -0.503422  
H 3.773932 1.822106 -0.895292  
H 2.414233 2.942730 -1.267798  
H 3.808022 3.468070 -0.249122  
H 2.871086 1.944565 2.815742  
H 4.329924 2.012331 1.785710  
H 3.977020 -0.243141 2.717976  
H 2.352499 -0.339542 2.032974  
H 4.969250 -0.147682 0.359203  
C 4.081888 -1.753115 -1.552959  
H 5.066025 -1.273084 -1.656598  
H 4.220380 -2.847863 -1.590120  
H 3.472839 -1.488779 -2.435892  
H 1.863758 -2.761616 -0.802827  
H 1.840076 -2.293835 0.898935  
H 0.939018 -0.104509 0.391263  
H -2.558209 -0.289317 2.202578  
O -4.407743 -0.498587 1.271626  
H -4.634860 0.446249 1.234436  
H -1.401456 0.884058 -2.642777  
H 0.324843 1.986956 -0.666965

Coordinates of the dominating conformers of 7

7-c2,  $\Delta G = 0.0000$  kcal/mol, population = 33.35 %

O -4.691987 0.817052 0.584160  
H -4.534702 1.712414 0.928111  
C -3.476928 0.101613 0.740927  
C -2.307239 0.894774 0.243043  
C -1.267779 0.418192 -0.462809  
C -0.366244 1.572615 -0.795747  
H 0.657708 1.462625 -0.409556  
H -0.288131 1.745585 -1.881429  
O -0.991640 2.719251 -0.194949  
C -2.146893 2.344503 0.411853  
O -2.884205 3.134236 0.967054  
C -1.080065 -1.021451 -0.868159  
C -1.246870 -1.110518 -2.402295  
H -0.552613 -0.424927 -2.910199

H -2.269185 -0.849376 -2.712983  
H -1.023969 -2.126607 -2.756883  
C 0.362280 -1.478130 -0.516621  
H 0.479521 -2.520805 -0.849217  
C 0.757781 -1.353434 0.963511  
C 2.179907 -1.789083 1.236578  
C 3.182679 -0.945118 1.537851  
C 3.144930 0.554106 1.650137  
C 4.175239 1.227905 0.737211  
C 3.861666 1.125717 -0.743988  
O 2.727661 0.945145 -1.149880  
C 5.025207 1.277033 -1.692691  
H 5.660511 2.128866 -1.403120  
H 5.654776 0.373170 -1.627202  
H 4.667534 1.396782 -2.723605  
H 4.236837 2.310707 0.956468  
H 5.189744 0.836101 0.920603  
H 3.375921 0.848321 2.689437  
H 2.146302 0.952200 1.425797  
H 4.171055 -1.386692 1.723567  
C 2.423178 -3.276067 1.157924  
H 1.770772 -3.819288 1.864240  
H 3.468216 -3.532757 1.385007  
H 2.187813 -3.670565 0.154628  
H 0.088915 -1.978723 1.578569  
H 0.598948 -0.318504 1.297110  
H 1.071781 -0.884986 -1.113614  
C -2.155127 -1.885508 -0.118232  
C -2.283433 -3.307186 -0.668971  
H -2.910989 -3.915879 -0.000028  
H -1.307199 -3.807713 -0.753320  
H -2.756577 -3.316238 -1.662956  
H -1.807826 -1.969710 0.924379  
C -3.531782 -1.198865 -0.054509  
H -4.267331 -1.880788 0.399463  
H -3.895729 -0.959323 -1.068026  
H -3.313547 -0.138684 1.812828

7-c1,  $\Delta G = 0.0860$  kcal/mol, population = 28.84 %

O 1.380387 -3.111843 -0.159940  
H 2.166804 -2.691630 0.225673  
C 0.509945 -2.061839 -0.553662  
C 0.295748 -1.081535 0.560694

C -0.863901 -0.481039 0.882715  
C -0.622312 0.370022 2.098879  
H -0.818513 1.436802 1.924580  
H -1.205652 0.038005 2.972340  
O 0.775335 0.207037 2.395081  
C 1.329414 -0.665873 1.514419  
O 2.497381 -0.997072 1.569098  
C -2.178333 -0.711045 0.181960  
C -3.087028 -1.503106 1.152549  
H -4.091055 -1.630524 0.724310  
H -3.202110 -0.967368 2.106260  
H -2.672338 -2.497798 1.371134  
C -2.896697 0.630399 -0.136911  
H -3.844022 0.369061 -0.630280  
C -2.147635 1.655783 -1.017609  
C -1.336326 2.709416 -0.293016  
C -0.003561 2.849399 -0.412869  
C 0.949736 1.976802 -1.182348  
C 2.300745 1.856894 -0.476205  
C 3.199970 0.756578 -1.007754  
O 2.830436 -0.013045 -1.876058  
C 4.565659 0.645516 -0.373366  
H 5.088841 1.614248 -0.390767  
H 4.433519 0.355922 0.681355  
H 5.161692 -0.118485 -0.889388  
H 2.858972 2.808536 -0.522468  
H 2.166453 1.674111 0.604255  
H 1.118182 2.386705 -2.195436  
H 0.532247 0.973438 -1.335007  
H 0.458935 3.694072 0.114033  
C -2.135260 3.676589 0.545346  
H -1.493275 4.438322 1.010776  
H -2.684700 3.161155 1.352305  
H -2.898576 4.189554 -0.065769  
H -2.909388 2.196741 -1.605928  
H -1.526784 1.135476 -1.758702  
H -3.192967 1.100730 0.814237  
C -1.902084 -1.527906 -1.131919  
C -3.167147 -2.106454 -1.770842  
H -3.956492 -1.350390 -1.892986  
H -3.579858 -2.935441 -1.175623  
H -2.932886 -2.504354 -2.770022  
H -1.470820 -0.814325 -1.853396  
C -0.848765 -2.633132 -0.938454

H -0.754196 -3.220474 -1.864792  
H -1.161006 -3.331964 -0.144054  
H 0.942149 -1.519631 -1.417269

7-c10,  $\Delta G = 0.8214$  kcal/mol, population = 8.32 %

O -4.416431 1.795198 -0.859052  
H -5.028037 1.059548 -1.028135  
C -3.103628 1.270051 -0.978312  
C -2.943412 0.008747 -0.184541  
C -1.885809 -0.323309 0.574293  
C -2.164095 -1.665439 1.193120  
H -1.444474 -2.439527 0.882985  
H -2.181399 -1.635525 2.294297  
O -3.468703 -2.032304 0.720426  
C -3.952178 -1.054796 -0.092603  
O -5.050979 -1.111923 -0.603977  
C -0.663785 0.533170 0.780371  
C -0.719390 1.108279 2.214954  
H -1.580860 1.777464 2.352189  
H 0.198929 1.669873 2.437178  
H -0.799088 0.299629 2.956852  
C 0.613842 -0.337330 0.673273  
H 1.490897 0.282828 0.902213  
C 0.845081 -1.027638 -0.679905  
C 2.004087 -1.998549 -0.637251  
C 3.232584 -1.714179 -1.104773  
C 3.709725 -0.444616 -1.756166  
C 4.946697 0.139366 -1.065055  
C 4.663247 0.813474 0.266492  
O 3.570011 1.277891 0.532468  
C 5.818160 0.901911 1.234610  
H 5.573762 1.577389 2.064764  
H 6.024350 -0.106608 1.632294  
H 6.734917 1.235414 0.723185  
H 5.731105 -0.623812 -0.930891  
H 5.405811 0.923111 -1.697065  
H 2.921211 0.319560 -1.775055  
H 3.979078 -0.656481 -2.806316  
H 3.999924 -2.494673 -1.013175  
C 1.699828 -3.336015 -0.010546  
H 2.588421 -3.982574 0.035528  
H 0.915392 -3.865524 -0.579902  
H 1.311080 -3.220394 1.016149



H 1.013433 -0.269144 -1.455120  
H -0.066248 -1.574784 -0.980946  
H 0.568687 -1.098343 1.470298  
C -0.687900 1.670621 -0.299432  
C 0.367141 2.752989 -0.063611  
H 0.124555 3.367326 0.817580  
H 0.409711 3.429652 -0.931422  
H 1.370118 2.326724 0.079828  
H -0.449268 1.184341 -1.259849  
C -2.088450 2.288288 -0.467484  
H -2.038836 3.140986 -1.162008  
H -2.459282 2.678830 0.494944  
H -2.881827 1.042563 -2.042466

7-c27,  $\Delta G = 0.9111$  kcal/mol, population = 7.15 %

O 4.119333 2.067819 0.306778  
H 4.562544 1.632977 1.054022  
C 2.791955 1.568259 0.272448  
C 2.765969 0.071348 0.346192  
C 1.980239 -0.746393 -0.373707  
C 2.301573 -2.161750 0.020431  
H 1.444438 -2.689155 0.468377  
H 2.675294 -2.767954 -0.820262  
O 3.339016 -2.049455 1.005700  
C 3.634684 -0.737836 1.211456  
O 4.498496 -0.373631 1.981455  
C 0.988750 -0.298379 -1.416653  
C 1.568833 -0.649591 -2.806402  
H 0.840894 -0.419430 -3.597256  
H 1.799576 -1.723247 -2.873569  
H 2.494670 -0.093497 -3.011692  
C -0.340588 -1.075496 -1.242753  
H -1.021806 -0.799105 -2.062183  
C -1.061879 -0.874221 0.097560  
C -2.246074 -1.803900 0.252167  
C -3.475304 -1.496665 -0.197723  
C -3.899775 -0.231365 -0.893293  
C -4.905877 0.588028 -0.078213  
C -4.300732 1.318145 1.108705  
O -3.108807 1.549706 1.186892  
C -5.266332 1.763133 2.182187  
H -6.162361 2.226697 1.740550  
H -5.608354 0.874915 2.740530

H -4.775703 2.459195 2.875044  
H -5.367446 1.373529 -0.706399  
H -5.747073 -0.035020 0.269832  
H -4.373276 -0.493840 -1.855061  
H -3.034796 0.403362 -1.130324  
H -4.274678 -2.234745 -0.049398  
C -1.954375 -3.126785 0.910830  
H -1.149848 -3.664723 0.377864  
H -2.838307 -3.780912 0.940779  
H -1.594095 -2.979994 1.944335  
H -1.399721 0.164913 0.199399  
H -0.355409 -1.050934 0.926698  
H -0.132019 -2.148613 -1.390987  
C 0.782616 1.247814 -1.247495  
C -0.016694 1.882347 -2.386774  
H 0.558706 1.903163 -3.325063  
H -0.274275 2.922228 -2.134006  
H -0.957889 1.345697 -2.578482  
H 0.195882 1.379163 -0.323602  
C 2.110844 1.994578 -1.024511  
H 1.929767 3.080275 -1.006959  
H 2.811586 1.798716 -1.853210  
H 2.213262 1.968860 1.131405

7-c35,  $\Delta G = 1.3448$  kcal/mol, population = 3.44 %

O 4.252767 2.054365 0.881199  
H 4.946422 1.380454 0.974002  
C 3.010543 1.384194 1.022170  
C 2.941577 0.166150 0.151559  
C 1.885968 -0.230909 -0.578080  
C 2.272546 -1.491161 -1.302259  
H 1.658756 -2.359356 -1.014522  
H 2.227268 -1.388403 -2.398246  
O 3.632318 -1.741667 -0.917631  
C 4.051563 -0.772427 -0.060531  
O 5.175178 -0.741891 0.395726  
C 0.571302 0.501491 -0.668899  
C 0.492814 1.168112 -2.062054  
H 1.268589 1.936760 -2.188117  
H -0.490175 1.637350 -2.209603  
H 0.624655 0.421945 -2.859679  
C -0.600408 -0.506347 -0.560112  
H -1.543068 0.038945 -0.714767

C -0.690198 -1.301165 0.751331  
C -1.727898 -2.403551 0.676230  
C -3.039397 -2.179984 0.873757  
C -3.674266 -0.851504 1.172306  
C -4.471507 -0.300868 -0.016428  
C -4.863450 1.159942 0.121482  
O -4.302102 1.903605 0.904477  
C -5.968407 1.645830 -0.787234  
H -6.924266 1.203873 -0.458528  
H -6.041932 2.740526 -0.750478  
H -5.800591 1.307307 -1.821901  
H -3.866272 -0.360170 -0.941020  
H -5.369409 -0.905667 -0.225650  
H -2.921088 -0.104530 1.456835  
H -4.357317 -0.942718 2.035277  
H -3.727574 -3.028099 0.766561  
C -1.203154 -3.766026 0.307829  
H -0.660718 -3.731792 -0.654223  
H -2.008640 -4.509542 0.216532  
H -0.478088 -4.127192 1.058203  
H -0.922906 -0.618042 1.580540  
H 0.292903 -1.741520 0.987276  
H -0.530470 -1.210523 -1.406410  
C 0.534444 1.563524 0.485263  
C -0.637033 2.541993 0.379011  
H -0.683712 3.168650 1.282973  
H -1.606786 2.031094 0.288858  
H -0.525071 3.217873 -0.482783  
H 0.401882 0.994419 1.420500  
C 1.869776 2.317218 0.627308  
H 1.768352 3.115457 1.378345  
H 2.146374 2.802903 -0.323280  
H 2.868070 1.067143 2.076887

7-c20,  $\Delta G = 1.3811$  kcal/mol, population = 3.23 %

O -4.327621 0.991220 1.034217  
H -4.100116 1.933455 1.106451  
C -3.104236 0.273991 1.068763  
C -2.091497 0.870207 0.138977  
C -1.242302 0.194225 -0.653454  
C -0.424723 1.200559 -1.416607  
H 0.645024 1.164307 -1.159415  
H -0.537074 1.112705 -2.508620

O -0.930052 2.481678 -1.003438  
C -1.907421 2.310850 -0.077732  
O -2.505138 3.240082 0.426647  
C -1.177577 -1.309266 -0.766920  
C -1.756292 -1.706474 -2.144919  
H -2.826410 -1.464491 -2.219627  
H -1.630207 -2.784351 -2.320653  
H -1.233085 -1.177746 -2.955407  
C 0.298437 -1.784743 -0.714512  
H 0.310620 -2.884550 -0.767865  
C 1.109420 -1.316126 0.502267  
C 2.509071 -1.897736 0.531564  
C 3.530691 -1.406333 -0.191896  
C 3.506890 -0.235955 -1.138502  
C 4.265372 0.986174 -0.606860  
C 3.505356 1.779912 0.442769  
O 2.287542 1.807060 0.470892  
C 4.335353 2.560445 1.430823  
H 3.703036 3.244678 2.011294  
H 4.831359 1.849814 2.114023  
H 5.135104 3.116431 0.916358  
H 5.256609 0.706011 -0.215429  
H 4.461739 1.704543 -1.425712  
H 2.478981 0.064353 -1.379043  
H 3.973061 -0.541327 -2.090350  
H 4.506171 -1.900496 -0.094936  
C 2.685515 -3.107093 1.412666  
H 1.971240 -3.901774 1.132169  
H 2.471041 -2.859974 2.467444  
H 3.702381 -3.522346 1.352821  
H 0.591417 -1.613690 1.426810  
H 1.161129 -0.218957 0.517769  
H 0.803959 -1.443063 -1.632586  
C -2.017309 -1.925028 0.407117  
C -2.276203 -3.425179 0.250382  
H -2.716253 -3.829113 1.175016  
H -1.352409 -3.988319 0.051241  
H -2.983076 -3.632191 -0.567787  
H -1.412806 -1.790345 1.319264  
C -3.338615 -1.172783 0.647666  
H -3.927377 -1.692661 1.418982  
H -3.950700 -1.159725 -0.269940  
H -2.685431 0.286530 2.097393

7-c9,  $\Delta G = 1.6171$  kcal/mol, population = 2.17 %

O 4.439420 -1.671696 -0.865575  
H 5.022580 -0.911674 -1.027214  
C 3.107810 -1.201045 -1.001524  
C 2.884917 0.050933 -0.208157  
C 1.804767 0.337486 0.537356  
C 2.020298 1.688330 1.162564  
H 1.274874 2.434199 0.843961  
H 2.023614 1.656206 2.263836  
O 3.315069 2.108801 0.708721  
C 3.848726 1.154161 -0.100045  
O 4.950924 1.257126 -0.596414  
C 0.616767 -0.569636 0.726203  
C 0.673852 -1.143297 2.161066  
H 1.559649 -1.777149 2.310172  
H -0.223887 -1.742644 2.368477  
H 0.709554 -0.333051 2.904569  
C -0.694780 0.247007 0.599442  
H -1.541949 -0.413939 0.827432  
C -0.934222 0.919444 -0.761828  
C -2.104902 1.876945 -0.739577  
C -3.334345 1.564305 -1.188444  
C -3.798457 0.256627 -1.766236  
C -4.908992 -0.407714 -0.919537  
C -4.373955 -0.805367 0.445991  
O -3.573581 -1.717631 0.556412  
C -4.822249 0.009861 1.630433  
H -4.364718 -0.363576 2.555805  
H -4.533192 1.061418 1.463595  
H -5.921217 -0.007644 1.712999  
H -5.768661 0.272237 -0.819818  
H -5.250336 -1.323968 -1.427015  
H -2.968521 -0.456988 -1.867645  
H -4.206400 0.422267 -2.778583  
H -4.111782 2.335822 -1.113161  
C -1.812894 3.237042 -0.158454  
H -2.709146 3.873568 -0.127271  
H -1.037999 3.756922 -0.748845  
H -1.417854 3.157437 0.869318  
H -1.085998 0.149523 -1.529425  
H -0.028820 1.475082 -1.063651  
H -0.695049 1.012447 1.393215  
C 0.701906 -1.703510 -0.354484

C -0.307500 -2.831820 -0.135036  
H -0.049761 -3.437417 0.748027  
H -0.306765 -3.507603 -1.004601  
H -1.332424 -2.456767 -0.003919  
H 0.455963 -1.225972 -1.317390  
C 2.129363 -2.261400 -0.505277  
H 2.124216 -3.113982 -1.201666  
H 2.503974 -2.638714 0.460978  
H 2.890690 -0.981020 -2.068166

7-c38,  $\Delta G = 1.6246$  kcal/mol, population = 2.14 %

O -2.736362 1.601902 2.117434  
H -2.587700 2.474387 1.716712  
C -1.727687 0.743452 1.607357  
C -1.652769 0.821810 0.113007  
C -1.498948 -0.209454 -0.734578  
C -1.584883 0.329978 -2.136058  
H -0.693080 0.128583 -2.742086  
H -2.468762 -0.049074 -2.674482  
O -1.718975 1.751456 -1.980986  
C -1.774706 2.062866 -0.659722  
O -1.906809 3.201304 -0.258695  
C -1.346606 -1.651180 -0.322441  
C -2.637779 -2.394996 -0.739516  
H -3.516028 -2.008280 -0.202415  
H -2.550274 -3.471168 -0.534645  
H -2.824387 -2.281005 -1.817584  
C -0.159770 -2.325841 -1.067831  
H -0.145618 -3.380737 -0.755098  
C 1.255732 -1.747136 -0.865085  
C 1.598254 -0.520881 -1.684185  
C 1.766448 0.714072 -1.177484  
C 1.654427 1.160725 0.251899  
C 2.999765 1.604511 0.834990  
C 3.935399 0.452440 1.162902  
O 3.522633 -0.675842 1.354533  
C 5.404393 0.788910 1.261935  
H 5.961993 -0.049605 1.699183  
H 5.789837 0.994659 0.248671  
H 5.559683 1.704989 1.853373  
H 3.514575 2.319455 0.171840  
H 2.848167 2.145528 1.788210  
H 1.240105 0.369371 0.887864

H 0.956005 2.012198 0.309052  
H 2.040446 1.511314 -1.881022  
C 1.794585 -0.773956 -3.159077  
H 0.912789 -1.258118 -3.613636  
H 2.638410 -1.467027 -3.323533  
H 1.995909 0.154315 -3.713078  
H 1.965006 -2.539393 -1.162452  
H 1.457550 -1.564895 0.197324  
H -0.399290 -2.352283 -2.143680  
C -1.136474 -1.697098 1.233193  
C -1.276899 -3.099100 1.830162  
H -0.942238 -3.095216 2.878806  
H -0.669962 -3.842879 1.293220  
H -2.322769 -3.442505 1.820466  
H -0.098438 -1.373076 1.411024  
C -2.036890 -0.700738 1.985208  
H -1.913658 -0.834719 3.070804  
H -3.099364 -0.888655 1.755797  
H -0.743336 1.026421 2.032789

7-c6,  $\Delta G = 1.9014$  kcal/mol, population = 1.34 %

O 4.323289 1.229103 -0.041350  
H 4.090913 2.114804 -0.367189  
C 3.264939 0.366209 -0.425908  
C 1.926889 0.945872 -0.082754  
C 0.869769 0.282209 0.418154  
C -0.257712 1.263815 0.568702  
H -1.111973 1.005128 -0.072046  
H -0.622660 1.362388 1.602097  
O 0.281000 2.524057 0.135481  
C 1.569360 2.358365 -0.258204  
O 2.258281 3.274857 -0.659337  
C 0.884689 -1.172705 0.818720  
C 0.988480 -1.194688 2.365688  
H 1.902288 -0.697900 2.720805  
H 0.984509 -2.228867 2.738088  
H 0.126148 -0.679498 2.813959  
C -0.435139 -1.909718 0.460188  
H -0.399659 -2.883197 0.973636  
C -0.782858 -2.187922 -1.016233  
C -1.231541 -0.997579 -1.845118  
C -2.481628 -0.501985 -1.790701  
C -3.644604 -1.010733 -0.979916

C -4.419759 0.104801 -0.270181  
C -3.754286 0.656039 0.978121  
O -2.950820 0.004830 1.621624  
C -4.145557 2.053717 1.389256  
H -3.820507 2.257837 2.417719  
H -3.649111 2.764917 0.706116  
H -5.229653 2.214187 1.285147  
H -4.648632 0.935180 -0.958559  
H -5.404024 -0.268990 0.070146  
H -3.327430 -1.755699 -0.237862  
H -4.348682 -1.522918 -1.660758  
H -2.715021 0.354192 -2.437583  
C -0.211116 -0.410819 -2.786885  
H 0.709527 -0.120483 -2.257690  
H -0.597879 0.474493 -3.312773  
H 0.089168 -1.158227 -3.542581  
H -1.588409 -2.938694 -1.007585  
H 0.065911 -2.678687 -1.517581  
H -1.269160 -1.363363 0.923653  
C 2.134791 -1.837219 0.145662  
C 2.400266 -3.266469 0.622590  
H 2.738468 -3.287752 1.670116  
H 3.192780 -3.726189 0.012282  
H 1.508026 -3.904477 0.541603  
H 1.907521 -1.889843 -0.932273  
C 3.405389 -0.977788 0.280651  
H 4.268704 -1.523139 -0.130447  
H 3.628524 -0.778861 1.341792  
H 3.295182 0.199535 -1.524293

7-c23,  $\Delta G = 1.9641$  kcal/mol, population = 1.21 %

O -4.561469 -0.761658 0.008270  
H -4.466382 -1.608326 -0.459349  
C -3.391173 -0.009475 -0.268480  
C -2.152120 -0.827135 -0.060916  
C -1.012246 -0.414559 0.519246  
C -0.061757 -1.579340 0.547825  
H 0.862897 -1.421752 -0.026193  
H 0.222489 -1.873015 1.571081  
O -0.782593 -2.665021 -0.056041  
C -2.021202 -2.245335 -0.420767  
O -2.840083 -2.981009 -0.932851  
C -0.786939 0.960905 1.097025

C -0.788859 0.827071 2.638283  
H -1.763102 0.482034 3.013181  
H -0.555917 1.791902 3.110605  
H -0.025860 0.106311 2.967827  
C 0.604619 1.499714 0.674818  
H 0.778613 2.455104 1.193067  
C 0.838076 1.687300 -0.832769  
C 2.225703 2.217029 -1.128324  
C 3.281353 1.425110 -1.389211  
C 3.284443 -0.076153 -1.430414  
C 3.975496 -0.701791 -0.211836  
C 3.780599 -2.203607 -0.093999  
O 2.828653 -2.764352 -0.606030  
C 4.808029 -2.956220 0.715721  
H 5.764419 -2.962567 0.165903  
H 4.996390 -2.445857 1.673666  
H 4.479157 -3.988876 0.890107  
H 5.050737 -0.461705 -0.185689  
H 3.561948 -0.274445 0.721862  
H 3.804564 -0.426196 -2.339225  
H 2.262522 -0.472594 -1.496438  
H 4.252249 1.908029 -1.557958  
C 2.364283 3.716539 -1.070190  
H 3.404289 4.041390 -1.220485  
H 2.018862 4.110012 -0.098058  
H 1.734864 4.198941 -1.838746  
H 0.100396 2.399114 -1.234638  
H 0.660545 0.734341 -1.353708  
H 1.372535 0.813654 1.068759  
C -1.947118 1.890361 0.596836  
C -1.986413 3.247712 1.301750  
H -2.708171 3.911418 0.801468  
H -1.008058 3.750811 1.285552  
H -2.300882 3.151884 2.352383  
H -1.748439 2.081593 -0.470425  
C -3.321577 1.200386 0.658523  
H -4.111461 1.918544 0.390138  
H -3.537211 0.851455 1.682210  
H -3.406600 0.343212 -1.321447

7-c13,  $\Delta G = 2.0061$  kcal/mol, population = 1.12 %

O 3.779736 -1.578875 1.273906  
H 3.441655 -2.478578 1.131210

C 2.654745 -0.714145 1.244274  
C 1.786786 -0.982223 0.053472  
C 1.190045 -0.058671 -0.715254  
C 0.427183 -0.777527 -1.791945  
H -0.657302 -0.607161 -1.721929  
H 0.758703 -0.513697 -2.808816  
O 0.686818 -2.170110 -1.569407  
C 1.462630 -2.317037 -0.463060  
O 1.816560 -3.402292 -0.050336  
C 1.309779 1.433401 -0.531746  
C 2.199789 1.976040 -1.673842  
H 2.276488 3.071135 -1.618895  
H 1.769183 1.724968 -2.654847  
H 3.213998 1.552983 -1.633249  
C -0.091040 2.086484 -0.665732  
H 0.037525 3.174778 -0.768259  
C -1.075120 1.776851 0.474254  
C -2.532008 2.010016 0.121459  
C -3.535145 1.246489 0.594220  
C -3.461394 0.088084 1.555026  
C -3.705325 -1.276899 0.896125  
C -2.467580 -1.869640 0.243676  
O -1.349599 -1.585559 0.634854  
C -2.689135 -2.841232 -0.887807  
H -3.101559 -2.289945 -1.750283  
H -1.744573 -3.318197 -1.177174  
H -3.441220 -3.596442 -0.608900  
H -4.013725 -2.022398 1.653795  
H -4.531119 -1.236939 0.167580  
H -4.231892 0.238520 2.329485  
H -2.494008 0.054401 2.075066  
H -4.552456 1.503932 0.271081  
C -2.832305 3.201752 -0.754213  
H -2.409144 4.123105 -0.315856  
H -3.914879 3.348227 -0.879665  
H -2.383618 3.104236 -1.756416  
H -0.820601 2.414194 1.341008  
H -0.941645 0.737207 0.802896  
H -0.517515 1.754633 -1.626323  
C 1.945630 1.693195 0.877014  
C 2.349295 3.151527 1.098633  
H 2.627792 3.312177 2.151526  
H 1.527972 3.845494 0.863156  
H 3.216842 3.432392 0.481821

H 1.161619 1.454419 1.613784  
C 3.116146 0.739234 1.178587  
H 3.590859 1.020955 2.131116  
H 3.891219 0.812353 0.397486  
H 2.043162 -0.856523 2.160469

7-c15,  $\Delta G = 2.0501$  kcal/mol, population = 1.04 %

O -4.496825 0.805893 -0.431415  
H -4.949492 -0.020156 -0.659641  
C -3.182688 0.725637 -0.984732  
C -2.469471 -0.491637 -0.480547  
C -1.387985 -0.506236 0.317865  
C -1.036075 -1.935874 0.606599  
H -0.029227 -2.211490 0.253307  
H -1.091533 -2.171922 1.681784  
O -2.029279 -2.708870 -0.084070  
C -2.909090 -1.875503 -0.709168  
O -3.876325 -2.284043 -1.314087  
C -0.654117 0.719224 0.787437  
C -0.091217 0.483091 2.202219  
H 0.732530 -0.245166 2.164265  
H -0.861100 0.100656 2.886860  
H 0.298257 1.417587 2.631171  
C 0.526728 0.907234 -0.212218  
H 1.082324 -0.038226 -0.244246  
C 1.532890 2.020888 0.120696  
C 2.718867 1.968534 -0.818681  
C 3.857027 1.309245 -0.536274  
C 4.208870 0.559241 0.721012  
C 4.623234 -0.893636 0.452039  
C 3.474043 -1.849346 0.179473  
O 2.363327 -1.668297 0.647589  
C 3.787068 -3.049834 -0.677417  
H 3.918380 -2.710563 -1.719426  
H 4.738772 -3.512620 -0.372356  
H 2.971121 -3.782901 -0.633651  
H 5.356547 -0.956111 -0.368411  
H 5.137380 -1.313006 1.337781  
H 3.379433 0.563683 1.440757  
H 5.060639 1.063113 1.211651  
H 4.644766 1.310189 -1.301573  
C 2.527501 2.667582 -2.140187  
H 2.364867 3.749711 -1.991266

H 1.630706 2.290505 -2.662095  
H 3.392354 2.536154 -2.807029  
H 1.868062 1.916691 1.160577  
H 1.049159 3.008600 0.042454  
H 0.122872 1.064002 -1.223164  
C -1.658705 1.918624 0.740122  
C -2.660507 1.910469 1.902363  
H -2.160362 2.017726 2.875191  
H -3.256907 0.986466 1.915333  
H -3.365680 2.749443 1.797219  
H -1.058150 2.838807 0.829388  
C -2.385738 1.985364 -0.619623  
H -1.654144 2.169669 -1.420426  
H -3.080461 2.839059 -0.631791  
H -3.259830 0.660991 -2.087452

7-c21,  $\Delta G = 2.0513$  kcal/mol, population = 1.04 %

O 2.906449 2.342376 -0.929693  
H 2.481590 3.043908 -0.408914  
C 1.996114 1.254898 -0.969827  
C 1.466215 0.929984 0.392815  
C 1.251994 -0.301660 0.883230  
C 0.725422 -0.157326 2.284336  
H -0.285329 -0.576480 2.405617  
H 1.383582 -0.613838 3.040593  
O 0.670433 1.258731 2.518054  
C 1.109156 1.922718 1.414970  
O 1.176519 3.132793 1.361509  
C 1.501155 -1.590436 0.141964  
C 2.671482 -2.324882 0.831553  
H 3.609566 -1.756531 0.746623  
H 2.824242 -3.316965 0.384201  
H 2.463270 -2.474849 1.901377  
C 0.228994 -2.475013 0.241100  
H 0.442231 -3.441287 -0.240152  
C -1.040697 -1.827359 -0.367472  
C -2.252482 -1.852803 0.533527  
C -2.797363 -0.748070 1.078560  
C -2.343124 0.681723 0.937699  
C -3.231969 1.518234 0.008743  
C -2.903431 1.358531 -1.467665  
O -1.798363 1.016563 -1.847971  
C -4.011387 1.680628 -2.440372

H -3.620735 1.736461 -3.464776  
H -4.774862 0.886012 -2.382442  
H -4.512254 2.622770 -2.166859  
H -4.303336 1.321025 0.175709  
H -3.094328 2.596888 0.214974  
H -1.317959 0.739972 0.553469  
H -2.337363 1.151291 1.934480  
H -3.693724 -0.884521 1.697691  
C -2.839889 -3.217197 0.787301  
H -3.156723 -3.687426 -0.160446  
H -3.707497 -3.176278 1.462085  
H -2.091317 -3.895666 1.232253  
H -1.298981 -2.352203 -1.303161  
H -0.836311 -0.792847 -0.664130  
H 0.062944 -2.710951 1.305013  
C 1.825053 -1.248210 -1.355975  
C 2.429286 -2.423401 -2.127137  
H 1.840666 -3.344704 -2.001453  
H 3.461272 -2.634034 -1.806959  
H 2.458546 -2.193081 -3.203188  
H 0.859755 -1.010177 -1.831026  
C 2.697305 0.010703 -1.506663  
H 2.954604 0.159498 -2.566737  
H 3.646625 -0.105200 -0.956480  
H 1.134734 1.498973 -1.625977

7-c30,  $\Delta G = 2.1160$  kcal/mol, population = 0.93 %

O -2.772752 -1.948653 -1.827874  
H -2.266812 -2.774831 -1.751131  
C -1.918316 -0.907429 -1.380650  
C -1.273785 -1.250634 -0.072907  
C -1.083162 -0.418513 0.964576  
C -0.416299 -1.201008 2.064194  
H 0.588254 -0.827309 2.309857  
H -1.016945 -1.242075 2.986703  
O -0.280055 -2.533406 1.545137  
C -0.769232 -2.583816 0.280768  
O -0.776263 -3.601095 -0.382164  
C -1.508725 1.028735 1.001400  
C -2.706576 1.142966 1.973811  
H -2.978267 2.196717 2.130122  
H -2.455699 0.718713 2.957276  
H -3.588775 0.609496 1.591459

C -0.355640 1.904808 1.562017  
H -0.667128 2.959799 1.521060  
C 1.041893 1.724836 0.940194  
C 1.312164 2.319337 -0.424180  
C 1.677614 1.588102 -1.494304  
C 1.768019 0.086727 -1.608277  
C 3.182500 -0.486320 -1.430540  
C 3.545031 -0.843604 0.002449  
O 2.696470 -1.097162 0.838579  
C 5.017550 -0.906830 0.324928  
H 5.568253 -1.452568 -0.457259  
H 5.419320 0.120812 0.339216  
H 5.177611 -1.373976 1.305346  
H 3.280460 -1.441334 -1.981579  
H 3.953834 0.175445 -1.856116  
H 1.401834 -0.199507 -2.606988  
H 1.111441 -0.406566 -0.879979  
H 1.927886 2.136386 -2.411595  
C 1.214664 3.820868 -0.512529  
H 1.509588 4.193445 -1.504305  
H 1.852234 4.305096 0.247707  
H 0.184606 4.164670 -0.316956  
H 1.308276 0.663418 0.936171  
H 1.755526 2.204531 1.634963  
H -0.263608 1.674883 2.636481  
C -1.911934 1.459790 -0.452807  
C -2.653228 2.798004 -0.507576  
H -2.721547 3.147296 -1.549331  
H -2.142367 3.582573 0.069961  
H -3.680810 2.711660 -0.121639  
H -0.967972 1.584306 -1.003571  
C -2.718652 0.376200 -1.191246  
H -3.042641 0.758484 -2.171566  
H -3.632195 0.121013 -0.628012  
H -1.118019 -0.728270 -2.128392

7-c32,  $\Delta G = 2.2484$  kcal/mol, population = 0.75 %

O -0.248077 -2.671841 1.946232  
H -1.160003 -2.747063 1.620017  
C 0.273050 -1.453574 1.442931  
C 0.022927 -1.317311 -0.029235  
C 0.889888 -0.845438 -0.942107  
C 0.254084 -0.992238 -2.298353

H 0.137893 -0.044280 -2.844273  
H 0.806495 -1.691867 -2.946056  
O -1.050277 -1.536520 -2.042942  
C -1.200420 -1.755438 -0.711565  
O -2.208063 -2.239971 -0.236560  
C 2.269608 -0.321810 -0.635095  
C 3.300735 -1.314490 -1.222387  
H 4.319389 -0.912934 -1.125750  
H 3.115560 -1.486913 -2.292862  
H 3.260535 -2.287010 -0.710638  
C 2.493020 1.056502 -1.323220  
H 3.427318 1.483250 -0.927704  
C 1.366787 2.108404 -1.264254  
C 0.944669 2.638485 0.087468  
C -0.319920 2.570732 0.545739  
C -1.522377 1.970742 -0.130495  
C -2.437335 1.218147 0.833256  
C -3.668915 0.620902 0.178255  
O -3.933495 0.823602 -0.991670  
C -4.529262 -0.260131 1.053004  
H -4.004953 -1.222658 1.169595  
H -4.664345 0.171961 2.056059  
H -5.501611 -0.437916 0.574904  
H -1.901989 0.405072 1.350607  
H -2.786679 1.882615 1.644907  
H -1.235992 1.299001 -0.950912  
H -2.118439 2.771025 -0.606044  
H -0.525206 3.038471 1.517625  
C 2.013895 3.357223 0.871978  
H 1.630028 3.735929 1.830405  
H 2.407588 4.212541 0.294779  
H 2.877758 2.707452 1.085524  
H 0.488572 1.734801 -1.803999  
H 1.725225 2.970575 -1.856235  
H 2.692878 0.869557 -2.391254  
C 2.417005 -0.212226 0.925001  
C 3.861279 -0.013831 1.390956  
H 4.454295 -0.935151 1.283124  
H 3.876137 0.263910 2.455943  
H 4.377511 0.783415 0.835868  
H 1.842533 0.678143 1.218445  
C 1.778765 -1.398962 1.666921  
H 1.989130 -1.320940 2.744484  
H 2.207979 -2.354817 1.322003

H -0.192555 -0.593642 1.967407

7-c39,  $\Delta G = 2.3676$  kcal/mol, population = 0.61 %

O 4.142738 -1.495184 0.778888  
H 3.787811 -2.393252 0.890790  
C 3.039587 -0.607680 0.862565  
C 1.896715 -1.072219 0.011272  
C 1.104823 -0.300486 -0.752945  
C 0.136234 -1.202159 -1.469399  
H -0.921720 -1.027695 -1.221814  
H 0.243491 -1.152482 -2.564858  
O 0.474487 -2.530655 -1.037664  
C 1.510045 -2.478336 -0.163148  
O 2.001327 -3.471177 0.334909  
C 1.246547 1.194491 -0.905495  
C 1.791452 1.472287 -2.326198  
H 2.800085 1.055511 -2.459904  
H 1.832441 2.553491 -2.519249  
H 1.137583 1.026307 -3.090046  
C -0.139188 1.882249 -0.788436  
H -0.005290 2.961140 -0.962157  
C -0.896479 1.667777 0.531124  
C -2.205852 2.430137 0.570709  
C -3.363347 1.900626 0.137785  
C -3.521598 0.506836 -0.408270  
C -3.841174 -0.539836 0.666185  
C -3.661899 -1.975161 0.202572  
O -2.968117 -2.255847 -0.757679  
C -4.364883 -3.037273 1.013160  
H -4.201826 -2.876378 2.090576  
H -5.451760 -2.959497 0.840697  
H -4.019227 -4.036637 0.718605  
H -3.156256 -0.420876 1.527279  
H -4.852149 -0.405228 1.083838  
H -2.608547 0.192013 -0.930199  
H -4.319944 0.489209 -1.168134  
H -4.271124 2.512113 0.203930  
C -2.121745 3.836445 1.102129  
H -1.793555 3.839217 2.156609  
H -3.086821 4.360197 1.037951  
H -1.372440 4.426231 0.545107  
H -0.274494 2.004411 1.374552  
H -1.062051 0.591002 0.689291



H -0.772630 1.530587 -1.619741  
C 2.236541 1.706028 0.200019  
C 2.686480 3.153560 -0.009372  
H 3.229331 3.511363 0.878858  
H 1.836664 3.832798 -0.173354  
H 3.366458 3.246445 -0.870116  
H 1.680361 1.670584 1.150934  
C 3.451941 0.779621 0.381212  
H 4.157437 1.226455 1.098548  
H 3.994472 0.658097 -0.571298  
H 2.689224 -0.535248 1.914020

7-c36,  $\Delta G = 2.5671$  kcal/mol, population = 0.44 %

O 3.211688 1.648218 -1.209597  
H 3.420759 2.283934 -0.507372  
C 1.878681 1.193633 -0.964835  
C 1.781891 0.621457 0.416237  
C 1.457292 -0.640596 0.746611  
C 1.620000 -0.786762 2.233221  
H 0.688788 -1.052960 2.757090  
H 2.383442 -1.537074 2.495643  
O 2.061279 0.498227 2.691385  
C 2.195524 1.340776 1.628653  
O 2.622556 2.469676 1.741980  
C 1.074227 -1.700039 -0.254002  
C 1.499791 -3.094337 0.234003  
H 1.289672 -3.846177 -0.542576  
H 0.947709 -3.385473 1.139256  
H 2.571120 -3.140361 0.472037  
C -0.464973 -1.672545 -0.484609  
H -0.741082 -0.692991 -0.889363  
C -1.354705 -1.910699 0.746133  
C -2.822090 -1.742149 0.415758  
C -3.513013 -0.616204 0.668565  
C -3.025677 0.647255 1.325893  
C -3.334195 1.901960 0.502596  
C -2.450198 2.096595 -0.715900  
O -1.373342 1.538881 -0.824489  
C -2.966987 3.037408 -1.777476  
H -3.791051 2.540230 -2.317463  
H -3.385905 3.951007 -1.327699  
H -2.169748 3.289311 -2.488906  
H -4.392049 1.931747 0.190962

H -3.189520 2.810632 1.117100  
H -1.945396 0.609704 1.521176  
H -3.524926 0.759114 2.305146  
H -4.571402 -0.597466 0.375444  
C -3.475538 -2.924324 -0.253277  
H -4.525861 -2.723431 -0.510838  
H -3.442849 -3.812945 0.401744  
H -2.943877 -3.204549 -1.179050  
H -1.073366 -1.208044 1.541128  
H -1.193151 -2.924364 1.148883  
H -0.691538 -2.424791 -1.258742  
C 1.783785 -1.319555 -1.604417  
C 3.295488 -1.579308 -1.593002  
H 3.734313 -1.269376 -2.553940  
H 3.535038 -2.642380 -1.448622  
H 3.797802 -0.997330 -0.806025  
H 1.336826 -1.968344 -2.377151  
C 1.483011 0.139812 -2.008657  
H 0.411614 0.261647 -2.212007  
H 2.012525 0.382514 -2.942561  
H 1.175805 2.042726 -1.045538

7-c7,  $\Delta G = 2.5759$  kcal/mol, population = 0.43 %

O 2.774764 -2.842648 0.794886  
H 2.007729 -3.432111 0.881132  
C 2.287233 -1.515164 0.904224  
C 1.121668 -1.282693 -0.008628  
C 0.905835 -0.181428 -0.747993  
C -0.354813 -0.386887 -1.537436  
H -1.146708 0.341929 -1.309508  
H -0.182387 -0.381180 -2.625531  
O -0.820130 -1.691787 -1.154301  
C 0.038337 -2.243671 -0.255796  
O -0.133014 -3.348529 0.216212  
C 1.782959 1.044197 -0.763263  
C 2.447479 1.148124 -2.153157  
H 3.007180 2.089200 -2.247120  
H 1.689508 1.134830 -2.950425  
H 3.139362 0.312006 -2.331993  
C 0.881425 2.290639 -0.549712  
H 1.508482 3.191290 -0.627268  
C 0.089337 2.288370 0.782179  
C -1.371958 2.649078 0.641068

C -2.372578 1.809467 0.963902  
C -2.246791 0.418846 1.532086  
C -3.411726 -0.527903 1.214574  
C -3.607521 -0.856562 -0.257131  
O -3.451755 -0.018591 -1.126588  
C -4.016476 -2.272537 -0.578305  
H -4.277788 -2.365504 -1.640462  
H -3.164725 -2.935294 -0.351435  
H -4.858509 -2.591905 0.056381  
H -3.302097 -1.461250 1.787118  
H -4.365514 -0.078380 1.550918  
H -2.181671 0.484242 2.633962  
H -1.305073 -0.054090 1.216232  
H -3.399111 2.174316 0.841001  
C -1.651041 4.038367 0.127574  
H -2.729961 4.239083 0.052787  
H -1.205698 4.197109 -0.869880  
H -1.201827 4.799471 0.790502  
H 0.559756 3.000374 1.482585  
H 0.179696 1.305234 1.261670  
H 0.183868 2.345737 -1.400767  
C 2.841842 0.907489 0.385503  
C 3.986579 1.916816 0.276380  
H 4.594423 1.898614 1.193899  
H 3.617302 2.945021 0.143526  
H 4.655204 1.685259 -0.566930  
H 2.306752 1.125320 1.324773  
C 3.385238 -0.526398 0.522783  
H 4.184503 -0.551515 1.279315  
H 3.829290 -0.866513 -0.428135  
H 1.965827 -1.312601 1.947541

7-c11,  $\Delta G = 2.5866$  kcal/mol, population = 0.42 %

O 3.820561 -1.080118 1.048051  
H 3.575586 -2.010946 0.917038  
C 2.608894 -0.342911 1.093478  
C 1.712249 -0.682693 -0.056366  
C 0.982359 0.185465 -0.773501  
C 0.215109 -0.594556 -1.803195  
H -0.875200 -0.507688 -1.676494  
H 0.460814 -0.307444 -2.838086  
O 0.597869 -1.961391 -1.598812  
C 1.482972 -2.039266 -0.566419

O 1.974412 -3.088000 -0.205580  
C 0.965229 1.680029 -0.575234  
C 1.745672 2.323151 -1.744606  
H 2.802609 2.020111 -1.741315  
H 1.697373 3.419769 -1.685657  
H 1.313070 2.025785 -2.711682  
C -0.498765 2.188093 -0.636974  
H -0.489510 3.288078 -0.665348  
C -1.405346 1.692092 0.501415  
C -2.886572 1.782759 0.198370  
C -3.750097 0.793441 0.495000  
C -3.416686 -0.515296 1.166284  
C -3.097715 -1.683164 0.208929  
C -1.796121 -2.411481 0.516625  
O -0.934425 -1.918413 1.222200  
C -1.618346 -3.764571 -0.126989  
H -0.587786 -4.118185 -0.001028  
H -2.318446 -4.476627 0.341940  
H -1.873901 -3.719149 -1.196744  
H -3.912613 -2.422633 0.155545  
H -2.984354 -1.319918 -0.829468  
H -4.262354 -0.808791 1.807896  
H -2.552454 -0.390903 1.833124  
H -4.804417 0.946240 0.232974  
C -3.364192 3.070972 -0.421660  
H -4.458889 3.089051 -0.525119  
H -2.925047 3.234616 -1.420232  
H -3.060921 3.936478 0.194242  
H -1.196697 2.291032 1.406875  
H -1.138347 0.656542 0.754782  
H -0.919080 1.876231 -1.607658  
C 1.632567 1.984089 0.809374  
C 1.895789 3.472830 1.040244  
H 2.205912 3.645772 2.082237  
H 0.998098 4.082286 0.855799  
H 2.700254 3.849759 0.390048  
H 0.911000 1.655512 1.575016  
C 2.908289 1.152777 1.042003  
H 3.390808 1.465745 1.980721  
H 3.638383 1.322296 0.232935  
H 2.060399 -0.570864 2.031733

7-c25,  $\Delta G = 2.6688$  kcal/mol, population = 0.37 %

O -2.946824 -2.655071 0.030217  
H -3.301199 -2.545393 0.928428  
C -1.845555 -1.768283 -0.087477  
C -2.184448 -0.402005 0.427296  
C -1.796659 0.763394 -0.116840  
C -2.417202 1.875608 0.683580  
H -1.676960 2.545284 1.148589  
H -3.109617 2.491903 0.088324  
O -3.163875 1.220067 1.719583  
C -3.049428 -0.127759 1.582242  
O -3.611472 -0.910822 2.319754  
C -0.900215 0.908082 -1.318605  
C -1.697160 1.591750 -2.449718  
H -1.041135 1.825227 -3.299950  
H -2.136518 2.539769 -2.105270  
H -2.514913 0.948934 -2.808620  
C 0.312545 1.807176 -0.943262  
H 1.023766 1.780003 -1.782997  
C 1.033962 1.391483 0.351698  
C 2.435796 1.948929 0.476347  
C 3.510213 1.328150 -0.043187  
C 3.531394 0.042243 -0.829637  
C 4.096696 -1.151441 -0.047660  
C 3.112740 -1.821937 0.897211  
O 1.907977 -1.762447 0.726164  
C 3.710076 -2.601492 2.042682  
H 4.542042 -3.234161 1.695196  
H 4.134227 -1.889445 2.771150  
H 2.941996 -3.212224 2.534654  
H 4.408296 -1.953468 -0.744257  
H 5.009134 -0.876038 0.505871  
H 4.162088 0.191633 -1.721818  
H 2.531054 -0.221586 -1.197592  
H 4.491476 1.798041 0.103493  
C 2.558971 3.263419 1.201312  
H 1.924203 4.032508 0.726236  
H 3.594261 3.635149 1.217509  
H 2.204620 3.173215 2.243367  
H 1.076206 0.298353 0.413922  
H 0.444569 1.722081 1.221856  
H -0.021415 2.855785 -0.869515  
C -0.391778 -0.519765 -1.741665  
C 0.184214 -0.564006 -3.158748  
H -0.601124 -0.475395 -3.925216

H 0.699536 -1.522875 -3.323110  
H 0.918484 0.236804 -3.333019  
H 0.427000 -0.774191 -1.052063  
C -1.451185 -1.618665 -1.553024  
H -1.061509 -2.576991 -1.929982  
H -2.364666 -1.389784 -2.128655  
H -0.973974 -2.156608 0.479251

7-c40,  $\Delta G = 2.8401$  kcal/mol, population = 0.27 %

O -3.179045 -1.801822 -0.645657  
H -2.811312 -2.549241 -0.145031  
C -2.122592 -0.867875 -0.811146  
C -1.409345 -0.612990 0.480046  
C -0.967636 0.576878 0.917883  
C -0.317123 0.366401 2.257666  
H 0.749533 0.639496 2.264356  
H -0.820343 0.915123 3.069841  
O -0.437955 -1.041818 2.512307  
C -1.101728 -1.639807 1.485095  
O -1.382432 -2.819114 1.486914  
C -1.123695 1.886634 0.185890  
C -2.136664 2.753464 0.966667  
H -3.138555 2.299713 0.966163  
H -2.209642 3.757934 0.526304  
H -1.821783 2.875352 2.013748  
C 0.240982 2.626531 0.167965  
H 0.092938 3.611752 -0.297968  
C 1.388344 1.858366 -0.537719  
C 2.650423 1.732022 0.286118  
C 3.108798 0.549749 0.740489  
C 2.467690 -0.791540 0.503296  
C 2.982773 -1.519859 -0.743956  
C 2.035687 -2.597016 -1.249132  
O 0.855684 -2.603526 -0.949969  
C 2.629191 -3.636354 -2.169508  
H 3.256117 -3.162749 -2.941332  
H 3.290477 -4.296482 -1.582792  
H 1.835770 -4.236053 -2.634257  
H 3.080380 -0.805712 -1.583925  
H 3.991856 -1.939887 -0.603366  
H 1.383827 -0.689689 0.382731  
H 2.615019 -1.439070 1.383055  
H 4.046144 0.549941 1.310018

C 3.380861 3.020469 0.558857  
H 2.732380 3.747194 1.078185  
H 3.688166 3.501903 -0.386507  
H 4.278213 2.862176 1.174835  
H 1.639671 2.370944 -1.481890  
H 1.038044 0.860221 -0.829611  
H 0.519039 2.838610 1.213010  
C -1.621722 1.580738 -1.269932  
C -2.116382 2.822165 -2.015138  
H -2.279680 2.583824 -3.077371  
H -1.391231 3.648687 -1.969052  
H -3.072417 3.187000 -1.609173  
H -0.745440 1.199224 -1.820152  
C -2.677794 0.460965 -1.314338  
H -3.048660 0.341780 -2.344151  
H -3.546935 0.722638 -0.687262  
H -1.381156 -1.258302 -1.537051

7-c14,  $\Delta G = 2.9098$  kcal/mol, population = 0.24 %

O 4.355287 -1.038223 -0.489417  
H 4.853653 -0.242669 -0.730792  
C 3.031194 -0.867608 -0.996278  
C 2.422723 0.393862 -0.463988  
C 1.371273 0.481204 0.368902  
C 1.141696 1.929041 0.686991  
H 0.145696 2.288950 0.381345  
H 1.258421 2.142141 1.762235  
O 2.165283 2.633012 -0.032605  
C 2.958913 1.743285 -0.693467  
O 3.935216 2.084045 -1.325238  
C 0.564551 -0.693663 0.850011  
C 0.044402 -0.427934 2.275555  
H -0.723328 0.360960 2.260036  
H 0.850556 -0.107432 2.949833  
H -0.406177 -1.334386 2.704710  
C -0.646634 -0.800183 -0.125851  
H -1.139054 0.179350 -0.133832  
C -1.702439 -1.865278 0.212575  
C -2.891266 -1.772469 -0.720730  
C -3.989666 -1.044249 -0.446931  
C -4.266308 -0.231580 0.787818  
C -4.425330 1.284210 0.510509  
C -3.111919 1.902281 0.065012

O -2.224758 2.121152 0.873888  
C -2.934577 2.164528 -1.406605  
H -3.066314 1.214273 -1.951018  
H -3.720619 2.847481 -1.767976  
H -1.942249 2.584223 -1.616777  
H -5.208797 1.447966 -0.245214  
H -4.730067 1.785363 1.442276  
H -3.479143 -0.364578 1.543748  
H -5.208833 -0.576450 1.247489  
H -4.783686 -1.017902 -1.204463  
C -2.751250 -2.517158 -2.022817  
H -3.613246 -2.355118 -2.686331  
H -2.647588 -3.601906 -1.844474  
H -1.839412 -2.204297 -2.560716  
H -2.027533 -1.745742 1.254324  
H -1.259507 -2.871408 0.135081  
H -0.278068 -0.959339 -1.149647  
C 1.484137 -1.957536 0.776189  
C 2.517872 -2.016934 1.908750  
H 2.040559 -2.086927 2.896397  
H 3.178622 -1.137725 1.900276  
H 3.157967 -2.904186 1.785943  
H 0.827249 -2.835835 0.885176  
C 2.164431 -2.072146 -0.604256  
H 1.398836 -2.209474 -1.382096  
H 2.801304 -2.969269 -0.634878  
H 3.073404 -0.804679 -2.100914

7-c33,  $\Delta G = 2.9267$  kcal/mol, population = 0.24 %

O 3.171300 1.646228 -1.695114  
H 2.912755 2.516057 -1.348744  
C 2.086600 0.766999 -1.437118  
C 1.640922 0.851400 -0.010558  
C 1.289251 -0.183041 0.768529  
C 0.938754 0.357362 2.127571  
H -0.091684 0.126457 2.437451  
H 1.620315 -0.000848 2.916073  
O 1.078751 1.781125 2.009453  
C 1.516796 2.096551 0.757779  
O 1.757994 3.234470 0.417592  
C 1.220398 -1.623997 0.327468  
C 2.292905 -2.429454 1.089594  
H 3.307895 -2.107510 0.813105

H 2.199329 -3.503612 0.876499  
H 2.181218 -2.298227 2.176437  
C -0.185035 -2.172653 0.701170  
H -0.234934 -3.240606 0.439996  
C -1.334950 -1.390296 0.036717  
C -2.650982 -1.427256 0.772175  
C -3.234497 -0.328664 1.288664  
C -2.706342 1.085383 1.297930  
C -3.130375 1.956365 0.088111  
C -2.338670 1.590063 -1.157087  
O -1.163786 1.901826 -1.252284  
C -3.050236 0.795107 -2.219375  
H -2.361013 0.511098 -3.025007  
H -3.496760 -0.101721 -1.758799  
H -3.886169 1.386660 -2.628526  
H -4.212693 1.864796 -0.087571  
H -2.901236 3.009065 0.316857  
H -1.608805 1.115068 1.353110  
H -3.070341 1.584912 2.209025  
H -4.215474 -0.458531 1.761896  
C -3.298260 -2.783212 0.877883  
H -2.655445 -3.485353 1.436552  
H -3.444762 -3.226767 -0.122588  
H -4.272830 -2.736574 1.385188  
H -1.502188 -1.788304 -0.978609  
H -1.016151 -0.351230 -0.102573  
H -0.290936 -2.128652 1.797699  
C 1.438680 -1.669892 -1.226679  
C 1.715904 -3.077802 -1.756087  
H 1.673643 -3.082723 -2.856096  
H 0.976155 -3.807074 -1.392119  
H 2.715277 -3.434801 -1.463127  
H 0.491846 -1.333917 -1.678381  
C 2.508282 -0.673740 -1.708564  
H 2.687002 -0.811843 -2.786155  
H 3.468574 -0.850809 -1.194648  
H 1.220563 1.026542 -2.078781

7-c34,  $\Delta G = 2.9857$  kcal/mol, population = 0.21 %

O -4.946430 -0.197100 -0.240437  
H -5.169327 0.642534 0.195712  
C -3.688190 -0.601761 0.275836  
C -2.709968 0.530538 0.292773

C -1.404972 0.452059 -0.017481  
C -0.817360 1.831403 0.120055  
H -0.047476 1.892634 0.904162  
H -0.369338 2.210751 -0.810516  
O -1.921135 2.672787 0.491872  
C -3.048392 1.924592 0.603907  
O -4.127124 2.400915 0.895286  
C -0.668288 -0.801773 -0.426691  
C -0.214914 -0.619534 -1.892762  
H 0.341105 -1.496484 -2.249234  
H 0.449081 0.251009 -1.981775  
H -1.079233 -0.474441 -2.558032  
C 0.567275 -0.884217 0.515840  
H 1.124474 0.053558 0.398285  
C 1.578946 -2.022730 0.301235  
C 2.848487 -1.771317 1.088733  
C 3.931279 -1.162155 0.573522  
C 4.129947 -0.648790 -0.827650  
C 4.570069 0.820470 -0.860107  
C 3.461241 1.823981 -0.591615  
O 2.298127 1.582460 -0.861927  
C 3.878229 3.146740 0.001008  
H 4.167369 2.983649 1.053524  
H 4.766335 3.546078 -0.513746  
H 3.051874 3.868119 -0.041797  
H 5.408827 1.002962 -0.168613  
H 4.954981 1.081467 -1.864285  
H 3.219767 -0.759534 -1.431973  
H 4.917759 -1.244820 -1.322102  
H 4.791741 -1.012522 1.239471  
C 2.811543 -2.212768 2.529234  
H 1.962152 -1.751860 3.063106  
H 3.735320 -1.951313 3.066063  
H 2.664734 -3.304921 2.601800  
H 1.809212 -2.118070 -0.768204  
H 1.147016 -2.983726 0.620784  
H 0.202537 -0.911109 1.556366  
C -1.634542 -2.030216 -0.250043  
C -1.219876 -3.278756 -1.038537  
H -1.376408 -3.135500 -2.118848  
H -1.839547 -4.135116 -0.730260  
H -0.170097 -3.556533 -0.886136  
H -1.603722 -2.283193 0.825433  
C -3.100156 -1.702356 -0.597350

H -3.712452 -2.613064 -0.508618  
H -3.173076 -1.367047 -1.646195  
H -3.807958 -0.983892 1.311769

7-c26,  $\Delta G = 3.1030$  kcal/mol, population = 0.18 %

O -4.093096 1.414683 1.027688  
H -3.748010 2.321451 1.085850  
C -2.970922 0.547546 1.050266  
C -1.912317 1.001079 0.089840  
C -1.181846 0.212255 -0.716761  
C -0.318953 1.094834 -1.574556  
H 0.765295 0.923886 -1.478715  
H -0.582800 1.017358 -2.642229  
O -0.607640 2.433958 -1.133580  
C -1.564834 2.404313 -0.170513  
O -2.021165 3.410090 0.333955  
C -1.279139 -1.291540 -0.775978  
C -1.888998 -1.674402 -2.143257  
H -2.908167 -1.276655 -2.256484  
H -1.926498 -2.766513 -2.258723  
H -1.277849 -1.277693 -2.967556  
C 0.147202 -1.900814 -0.696778  
H 0.083693 -2.970978 -0.945106  
C 0.862401 -1.720522 0.652948  
C 2.354685 -1.950038 0.585913  
C 3.252426 -1.090301 1.099641  
C 2.970304 0.215148 1.809533  
C 2.557060 1.385868 0.882736  
C 3.428929 1.495526 -0.352060  
O 2.979107 1.290602 -1.466143  
C 4.883091 1.845350 -0.143198  
H 5.376304 1.059177 0.451092  
H 5.391646 1.943147 -1.110772  
H 4.972211 2.781606 0.430557  
H 1.518917 1.264268 0.549581  
H 2.617066 2.330053 1.449593  
H 3.868134 0.507640 2.374969  
H 2.170807 0.091449 2.557843  
H 4.311343 -1.355192 0.997387  
C 2.796861 -3.232871 -0.069845  
H 2.537440 -3.251477 -1.141741  
H 2.289907 -4.101016 0.387247  
H 3.882958 -3.379922 0.018518

H 0.438325 -2.436781 1.379356  
H 0.648103 -0.719328 1.052700  
H 0.755995 -1.447671 -1.496525  
C -2.173087 -1.770501 0.420055  
C -2.586470 -3.239315 0.315738  
H -3.054411 -3.568406 1.256168  
H -1.724243 -3.896691 0.126309  
H -3.318159 -3.399668 -0.490837  
H -1.552508 -1.670531 1.324838  
C -3.394238 -0.862244 0.647354  
H -4.040049 -1.292826 1.428043  
H -4.002077 -0.784413 -0.269760  
H -2.536218 0.514241 2.071618

7-c12,  $\Delta G = 3.1972$  kcal/mol, population = 0.15 %

O 4.069525 1.241625 -1.070079  
H 3.823492 2.179539 -1.005256  
C 2.859303 0.502516 -1.094934  
C 1.927233 0.940979 -0.004834  
C 1.173879 0.140867 0.769704  
C 0.446954 1.002456 1.762682  
H -0.650779 0.957802 1.674400  
H 0.723165 0.771309 2.804045  
O 0.871692 2.345788 1.467165  
C 1.751343 2.331778 0.429355  
O 2.275071 3.339376 0.000612  
C 1.153558 -1.364925 0.692269  
C 1.899570 -1.899679 1.938050  
H 2.949017 -1.572508 1.953545  
H 1.876029 -2.998254 1.960245  
H 1.420695 -1.541508 2.861382  
C -0.305403 -1.889245 0.758399  
H -0.267238 -2.974014 0.935423  
C -1.181326 -1.598376 -0.466693  
C -2.646457 -1.935850 -0.272483  
C -3.650417 -1.196380 -0.776396  
C -3.564324 0.049417 -1.610054  
C -3.997511 1.336225 -0.856374  
C -2.909750 1.765002 0.105454  
O -2.788337 1.230722 1.195374  
C -1.954169 2.826803 -0.382596  
H -1.180266 3.039917 0.363998  
H -1.483835 2.501803 -1.325958

H -2.515358 3.746376 -0.615817  
H -4.202695 2.135614 -1.583545  
H -4.917238 1.135304 -0.285540  
H -4.237995 -0.061476 -2.476090  
H -2.555858 0.190903 -2.028238  
H -4.674468 -1.533847 -0.571695  
C -2.946332 -3.204307 0.486893  
H -4.022388 -3.429803 0.482349  
H -2.616771 -3.141368 1.537439  
H -2.412217 -4.064255 0.045285  
H -0.806739 -2.192237 -1.319740  
H -1.066553 -0.543534 -0.757485  
H -0.781500 -1.460940 1.656126  
C 1.869088 -1.786840 -0.637780  
C 2.132924 -3.290423 -0.733551  
H 2.475330 -3.550336 -1.746962  
H 1.228160 -3.881890 -0.526819  
H 2.915460 -3.611852 -0.029140  
H 1.177310 -1.523451 -1.454362  
C 3.154631 -0.981152 -0.895711  
H 3.671896 -1.378325 -1.782632  
H 3.852246 -1.074006 -0.046789  
H 2.349722 0.641214 -2.071865

7-c19,  $\Delta G = 3.3164$  kcal/mol, population = 0.12 %

O -4.751337 0.321219 0.203060  
H -4.769564 1.094271 0.791908  
C -3.512009 -0.332019 0.425759  
C -2.369904 0.638548 0.408152  
C -1.168336 0.444883 -0.162097  
C -0.360222 1.699016 0.030075  
H 0.551242 1.542639 0.625543  
H -0.051333 2.170645 -0.914406  
O -1.225888 2.595674 0.744474  
C -2.420134 1.992251 0.975188  
O -3.338648 2.548263 1.542148  
C -0.756037 -0.800269 -0.906552  
C -0.669092 -0.441067 -2.408785  
H -1.650884 -0.160125 -2.816817  
H -0.281564 -1.291845 -2.986893  
H 0.019885 0.402237 -2.562813  
C 0.658520 -1.249721 -0.455972  
H 0.926328 -2.159852 -1.015120

C 0.857386 -1.505100 1.046399  
C 2.227624 -2.084636 1.351920  
C 3.352144 -1.346301 1.356721  
C 3.433477 0.119522 1.040884  
C 4.023843 0.381349 -0.372072  
C 3.612154 1.752130 -0.877502  
O 2.498645 1.926082 -1.343056  
C 4.605352 2.876292 -0.736290  
H 4.961303 2.933149 0.305695  
H 5.490431 2.664693 -1.359361  
H 4.156583 3.831842 -1.036972  
H 5.118331 0.270224 -0.352974  
H 3.615052 -0.360082 -1.073991  
H 4.051956 0.643875 1.788502  
H 2.432828 0.571118 1.092147  
H 4.305570 -1.852019 1.552716  
C 2.257761 -3.568678 1.602254  
H 3.280630 -3.944907 1.750992  
H 1.807969 -4.114449 0.753657  
H 1.656335 -3.831307 2.490416  
H 0.091150 -2.204287 1.412780  
H 0.702605 -0.569705 1.607698  
H 1.369340 -0.478185 -0.785763  
C -1.829134 -1.911705 -0.634204  
C -1.694770 -3.126683 -1.555039  
H -0.668085 -3.521503 -1.575373  
H -1.986936 -2.886599 -2.588958  
H -2.353263 -3.937274 -1.207076  
H -1.653709 -2.261944 0.396830  
C -3.268082 -1.366250 -0.667719  
H -3.984049 -2.195502 -0.560139  
H -3.476519 -0.884158 -1.637564  
H -3.524370 -0.843796 1.411288

7-c42,  $\Delta G = 3.5574$  kcal/mol, population = 0.08 %

O -3.596108 1.590122 1.192561  
H -3.356391 2.465506 0.847036  
C -2.427212 0.789815 1.129150  
C -1.800577 0.841258 -0.231275  
C -1.291567 -0.201506 -0.907418  
C -0.799169 0.302387 -2.236128  
H 0.278774 0.139463 -2.391216  
H -1.337514 -0.144831 -3.087176

O -1.055296 1.714566 -2.217589  
C -1.660363 2.055665 -1.046518  
O -1.998674 3.191177 -0.789925  
C -1.222054 -1.618895 -0.398969  
C -2.196790 -2.485129 -1.225968  
H -1.983867 -2.394508 -2.301570  
H -3.241755 -2.183983 -1.061964  
H -2.094600 -3.546215 -0.958256  
C 0.220386 -2.146517 -0.619602  
H 0.266298 -3.200401 -0.307073  
C 1.306411 -1.322547 0.096060  
C 2.682383 -1.448779 -0.509992  
C 3.377677 -0.399839 -0.986484  
C 2.962351 1.047787 -1.012494  
C 3.444412 1.852063 0.224423  
C 2.710878 1.420998 1.479225  
O 3.178533 0.596106 2.241156  
C 1.359641 2.056412 1.728766  
H 0.773078 1.446568 2.428083  
H 1.524592 3.051388 2.177232  
H 0.798445 2.220964 0.797321  
H 4.520799 1.685530 0.378697  
H 3.270838 2.924945 0.043293  
H 1.871527 1.161915 -1.106248  
H 3.391270 1.528167 -1.905750  
H 4.387502 -0.596755 -1.366835  
C 3.256499 -2.841342 -0.531649  
H 3.265147 -3.274881 0.483877  
H 4.283516 -2.854560 -0.924386  
H 2.645218 -3.518333 -1.152749  
H 1.367224 -1.630847 1.153210  
H 1.001049 -0.268534 0.115440  
H 0.418468 -2.150956 -1.704367  
C -1.596172 -1.605673 1.124480  
C -1.845285 -3.001672 1.697903  
H -2.783426 -3.435564 1.319121  
H -1.924786 -2.950529 2.794570  
H -1.027949 -3.698033 1.456761  
H -0.722700 -1.187291 1.651109  
C -2.774436 -0.664206 1.432969  
H -3.063603 -0.762070 2.490501  
H -3.657407 -0.934445 0.829621  
H -1.683157 1.144857 1.872355

7-c17,  $\Delta G = 3.7400$  kcal/mol, population = 0.06 %

O 3.388528 1.393890 -0.861895  
H 3.062501 2.266737 -0.588517  
C 2.256147 0.539772 -0.933388  
C 1.451897 0.595002 0.329928  
C 0.889889 -0.453734 0.953104  
C 0.225641 0.049940 2.205199  
H -0.855640 -0.153222 2.241013  
H 0.680377 -0.360761 3.120993  
O 0.429653 1.470998 2.187857  
C 1.175650 1.815500 1.100067  
O 1.514947 2.958083 0.878916  
C 0.922601 -1.879669 0.462601  
C 1.761239 -2.716505 1.452190  
H 1.727344 -3.782800 1.188169  
H 1.371242 -2.619095 2.476480  
H 2.812665 -2.393438 1.459411  
C -0.531462 -2.426324 0.451647  
H -0.507399 -3.493342 0.183577  
C -1.483083 -1.649318 -0.486064  
C -2.904776 -1.544295 0.014095  
C -3.472889 -0.364808 0.329152  
C -2.793866 0.980651 0.248570  
C -2.691027 1.549966 -1.194479  
C -1.491117 2.469877 -1.315653  
O -0.495990 2.118028 -1.924645  
C -1.553171 3.794364 -0.594724  
H -2.404632 4.388112 -0.964596  
H -1.724434 3.625998 0.480938  
H -0.613160 4.343048 -0.729818  
H -2.546895 0.732241 -1.913490  
H -3.619012 2.082867 -1.456535  
H -1.776742 0.909025 0.659467  
H -3.322382 1.701803 0.889309  
H -4.518646 -0.367339 0.657140  
C -3.658073 -2.842571 0.126872  
H -3.699645 -3.356638 -0.849619  
H -4.687165 -2.691007 0.484014  
H -3.153252 -3.536920 0.820610  
H -1.497117 -2.138806 -1.475167  
H -1.074029 -0.646053 -0.661102  
H -0.914929 -2.390950 1.484455  
C 1.534217 -1.887556 -0.982708



C 1.922506 -3.286042 -1.465627  
H 1.103223 -4.009076 -1.333773  
H 2.803803 -3.671176 -0.930093  
H 2.172664 -3.259726 -2.537263  
H 0.740570 -1.520240 -1.653310  
C 2.707153 -0.903045 -1.136949  
H 3.155350 -1.012526 -2.136535  
H 3.499814 -1.120804 -0.400932  
H 1.599368 0.844959 -1.770644

7-c22,  $\Delta G = 3.9288$  kcal/mol, population = 0.04 %

O -2.038469 -2.995185 -0.318130  
H -1.340778 -3.508275 0.120519  
C -1.487640 -1.717534 -0.605582  
C -0.891786 -1.093706 0.620109  
C -1.005514 0.193116 0.991246  
C -0.280383 0.366415 2.296782  
H 0.554552 1.081733 2.233500  
H -0.944985 0.678903 3.117873  
O 0.250989 -0.932886 2.602098  
C -0.097556 -1.811802 1.626197  
O 0.240228 -2.978028 1.644230  
C -1.738437 1.259615 0.219631  
C -2.991710 1.660644 1.029313  
H -3.506263 2.506873 0.552967  
H -2.716718 1.972459 2.047914  
H -3.700895 0.824188 1.112178  
C -0.825578 2.509875 0.084095  
H -1.403788 3.297470 -0.420542  
C 0.515957 2.267924 -0.656766  
C 1.756347 2.639345 0.127219  
C 2.678192 1.732006 0.504040  
C 2.599660 0.252149 0.230019  
C 3.064224 -0.147482 -1.198339  
C 2.392212 -1.442317 -1.608531  
O 1.469070 -1.435759 -2.406002  
C 2.820087 -2.712577 -0.912656  
H 2.523847 -3.585943 -1.509270  
H 3.899478 -2.729687 -0.704306  
H 2.290403 -2.771401 0.054354  
H 2.757377 0.622300 -1.919438  
H 4.161111 -0.241924 -1.230751  
H 1.560964 -0.081733 0.343495

H 3.183819 -0.303201 0.978779  
H 3.569108 2.089071 1.033103  
C 1.922798 4.104189 0.432621  
H 1.064875 4.494694 1.006358  
H 1.964673 4.693803 -0.500243  
H 2.837747 4.301670 1.009781  
H 0.519025 2.854572 -1.591196  
H 0.578605 1.220249 -0.974482  
H -0.633766 2.896760 1.097646  
C -2.116307 0.676020 -1.187788  
C -3.131558 1.533433 -1.945738  
H -3.219213 1.182841 -2.985414  
H -2.836037 2.592949 -1.977352  
H -4.132828 1.473915 -1.492199  
H -1.185951 0.671761 -1.779577  
C -2.585409 -0.788828 -1.116098  
H -2.916793 -1.121154 -2.111879  
H -3.451420 -0.885583 -0.439328  
H -0.695077 -1.808925 -1.374309

7-c44,  $\Delta G = 3.9621$  kcal/mol, population = 0.04 %

O -2.994413 1.406746 2.080451  
H -2.627130 2.305513 2.046832  
C -2.019907 0.542215 1.520159  
C -1.514615 1.062082 0.208708  
C -1.255377 0.327954 -0.886253  
C -0.826191 1.267690 -1.980795  
H 0.180808 1.060844 -2.373780  
H -1.527814 1.273424 -2.830311  
O -0.826275 2.570778 -1.376594  
C -1.258944 2.477913 -0.088236  
O -1.390658 3.445659 0.629792  
C -1.399125 -1.169075 -0.983728  
C -2.558066 -1.476594 -1.959873  
H -2.623666 -2.556431 -2.153889  
H -2.400571 -0.976963 -2.927201  
H -3.523245 -1.136647 -1.556726  
C -0.095192 -1.774699 -1.576171  
H -0.183719 -2.871567 -1.561955  
C 1.242798 -1.340223 -0.946576  
C 1.607157 -1.894254 0.413730  
C 1.893452 -1.123267 1.479125  
C 1.837716 0.376673 1.569526

C 3.211813 1.068992 1.374602  
C 3.694536 0.928928 -0.056125  
O 4.420648 0.014242 -0.396373  
C 3.208943 1.969789 -1.041945  
H 2.145450 2.212676 -0.895442  
H 3.768432 2.904721 -0.865987  
H 3.387028 1.634589 -2.071942  
H 3.115137 2.134804 1.635350  
H 3.957929 0.606320 2.037888  
H 1.465238 0.660450 2.566875  
H 1.117480 0.791217 0.850159  
H 2.223467 -1.630901 2.393740  
C 1.708217 -3.395256 0.499348  
H 2.373746 -3.790253 -0.287658  
H 0.727264 -3.875384 0.347327  
H 2.092649 -3.720961 1.476511  
H 1.298779 -0.244967 -0.932486  
H 2.039980 -1.662027 -1.639693  
H -0.057380 -1.502653 -2.643759  
C -1.691619 -1.736632 0.451207  
C -2.217596 -3.173881 0.438499  
H -2.196615 -3.591053 1.456902  
H -1.613221 -3.834346 -0.200886  
H -3.258242 -3.223340 0.082811  
H -0.725526 -1.740591 0.976519  
C -2.628922 -0.833233 1.271759  
H -2.859237 -1.314646 2.234596  
H -3.587725 -0.685660 0.746219  
H -1.159922 0.436965 2.213834
